# Supplementary material for: Off-line and on-line optical monitoring of microalgal growth
Source: PeerJ. 2019 Nov 1;7:e7956. doi: 10.7717/peerj.7956 (PMC6827447; doi:10.7717/peerj.7956)
Supplement: Supplemental Information 1 [file peerj-07-7956-s001.xlsx]

## Sheet: Exp. A bottle 1
Experiment A		Average of Bottle 1 Chl fluorescence measurements [W]; time in hours
bottle 1		12	24	36	48	60	72	84	96	108	168
	Wavelength [nm]	Pm	Am	Pm	Am	Pm	Am	Pm	Am	Pm	Am
	400	0.00195657	0.00159437	0.000759087	0.00062368	0.00023294	0.0003964	0.000189213	0.000164204	0.000135079	0.00022424
	400.5	0.00199133	0.00161267	0.00075051	0.000666843	0.000242713	0.00039702	0.000148987	0.000175756	0.000166234	0.000215997
	401	0.0020205	0.0016573	0.000757897	0.00067857	0.000238533	0.00046848	0.000118502	0.000132571	0.000160219	0.000177157
	401.5	0.00203427	0.00168323	0.00080642	0.0006492	0.000138404	0.00045585	9.56057e-05	9.30371e-05	0.000130195	0.000148953
	402	0.00201717	0.00168203	0.00083307	0.000606273	6.68603e-05	0.00040345	0.000123424	7.31527e-05	9.73047e-05	0.00012397
	402.5	0.0019975	0.00169953	0.000839227	0.000568693	7.9148e-05	0.00031358	0.000172477	8.19693e-05	6.9348e-05	0.000189568
	403	0.0019891	0.00169867	0.000829397	0.000550157	0.000131694	0.00021634	0.000153464	7.08459e-05	4.17367e-05	0.000250617
	403.5	0.00199957	0.00172827	0.000816137	0.000549613	0.000215283	0.00019431	0.000127822	6.63373e-05	2.60377e-05	0.00028961
	404	0.0020195	0.00172013	0.000839003	0.000540483	0.00026515	0.00019659	9.05656e-05	5.17153e-05	4.29503e-05	0.00030349
	404.5	0.0020379	0.00166763	0.000874153	0.000546037	0.000241183	0.00018059	8.57867e-05	4.73103e-05	5.14288e-05	0.00030308
	405	0.00203047	0.00162687	0.000880073	0.00057033	0.000188443	0.00017222	7.96073e-05	9.34063e-05	0.000131197	0.000325157
	405.5	0.0019872	0.00157423	0.00085424	0.000587237	0.000161261	0.00015541	6.04003e-05	0.000133704	0.000223507	0.00030725
	406	0.0019539	0.00155123	0.000858813	0.000594537	0.0001237	0.00017359	5.03767e-05	0.00016484	0.000289673	0.000276037
	406.5	0.00196803	0.001577	0.000835747	0.00056347	0.00015374	0.00023771	4.97157e-05	0.000198783	0.000338167	0.00022239
	407	0.0020087	0.0016073	0.00081874	0.00052134	0.000118971	0.00031344	5.3334e-05	0.00022704	0.00028433	0.000221493
	407.5	0.002048	0.0016566	0.000813793	0.000479437	0.000103281	0.00039419	7.1794e-05	0.00027096	0.000218647	0.000233527
	408	0.00206187	0.00169127	0.000784013	0.000474797	0.000114975	0.00045117	4.83533e-05	0.000276153	0.00018431	0.00024747
	408.5	0.00206137	0.0017179	0.00077816	0.000475053	0.00015339	0.00047793	3.54939e-05	0.00023662	0.000168329	0.000235983
	409	0.00205967	0.0017061	0.000800213	0.000507057	0.000221903	0.00044061	2.87261e-05	0.000179203	0.000115888	0.000222907
	409.5	0.00207757	0.0017151	0.000811567	0.000537303	0.00028157	0.0003389	2.5328e-05	0.000144591	5.71257e-05	0.00020821
	410	0.00210497	0.00171733	0.000844703	0.000567713	0.000302587	0.00021141	3.54017e-05	0.000133736	2.38422e-05	0.000225667
	410.5	0.0021468	0.001744	0.000877053	0.000581327	0.000275577	0.00017379	5.87233e-05	0.000124034	3.31027e-05	0.000268743
	411	0.0021703	0.0017815	0.000897643	0.000564053	0.000204084	0.00020907	9.32675e-05	0.000104014	8.71174e-05	0.00031193
	411.5	0.0021707	0.00179017	0.00093704	0.00054802	0.000138827	0.00025882	0.000124819	8.97827e-05	9.21833e-05	0.000314383
	412	0.00216693	0.00180623	0.00101432	0.000533133	0.000150635	0.0002762	0.00013768	8.98743e-05	7.915e-05	0.000274783
	412.5	0.0021673	0.0018194	0.00107834	0.000535097	0.000217423	0.00023316	0.000132501	0.000112815	5.13637e-05	0.000241777
	413	0.00219827	0.0018374	0.00110217	0.000547017	0.000317	0.00019863	7.8114e-05	0.000148393	4.26733e-05	0.000234217
	413.5	0.00222397	0.0018451	0.00109147	0.000568457	0.000333123	0.00022724	7.48783e-05	0.00015537	4.67489e-05	0.00024349
	414	0.00229	0.00187243	0.00106288	0.00060305	0.00030867	0.00027551	7.6553e-05	0.00015755	4.87813e-05	0.000243587
	414.5	0.0023836	0.0019363	0.0010558	0.000640553	0.00026473	0.00027532	8.14497e-05	0.000128027	5.22747e-05	0.00024352
	415	0.00246483	0.00200877	0.00105433	0.000667367	0.000225133	0.00022912	8.0683e-05	0.000108797	5.3629e-05	0.00025594
	415.5	0.00252727	0.00203837	0.00104003	0.000684257	0.00020324	0.00019484	6.8882e-05	0.000135583	7.60016e-05	0.00029103
	416	0.00258293	0.0020884	0.00103268	0.000689703	0.00017078	0.0002342	5.30973e-05	0.000163883	9.36033e-05	0.000303607
	416.5	0.0026551	0.00214387	0.00104767	0.000698233	0.000149737	0.00033599	6.0374e-05	0.00021846	0.000122949	0.000276953
	417	0.00276077	0.0022455	0.00109808	0.000709073	0.000123653	0.00043629	7.03617e-05	0.000227353	0.000147343	0.000261687
	417.5	0.00284263	0.0023215	0.0011595	0.00072859	0.000146363	0.00048471	9.6306e-05	0.000238933	0.000134027	0.00025695
	418	0.0029105	0.00237	0.00122267	0.0007499	0.000212983	0.00053808	0.000123013	0.000265113	0.00010941	0.00026372
	418.5	0.0029617	0.00240913	0.00127857	0.00077518	0.000303923	0.00055829	0.000139842	0.000288493	6.4665e-05	0.000273167
	419	0.0030034	0.00246077	0.00131873	0.00079832	0.000401123	0.00053881	0.000154741	0.00030282	1.85194e-05	0.000307563
	419.5	0.0031001	0.0025354	0.00142917	0.000815177	0.000456953	0.00045558	0.00016142	0.0003068	6.3616e-06	0.0003396
	420	0.00321693	0.00263647	0.0015275	0.000843047	0.00043633	0.00035672	0.00018148	0.000317873	2.86557e-06	0.000380377
	420.5	0.0033783	0.00274773	0.0016329	0.000872097	0.000397057	0.00034061	0.000214727	0.000335227	1.49733e-06	0.000406467
	421	0.00352753	0.00281763	0.0016986	0.000902533	0.000341817	0.00036426	0.00021256	0.0003701	2.26187e-05	0.00035672
	421.5	0.00364123	0.00285937	0.0016951	0.000962933	0.000329287	0.00037216	0.000183613	0.000350457	5.55053e-05	0.00033275
	422	0.00376347	0.00291433	0.00170983	0.00102563	0.000386833	0.00036641	0.000150795	0.000292413	0.000142848	0.00034408
	422.5	0.00391783	0.00301323	0.0017338	0.00109049	0.000450923	0.00038093	0.000126053	0.000239207	0.000196544	0.00036419
	423	0.00410353	0.0031474	0.00181107	0.00113901	0.000554073	0.00042068	0.000174977	0.000203663	0.000197817	0.000405657
	423.5	0.00430783	0.00328253	0.00191653	0.00115714	0.00064447	0.00047847	0.000206997	0.000190037	0.000211954	0.000444917
	424	0.00454357	0.0034344	0.0020526	0.00119608	0.000723817	0.00054846	0.000228527	0.000191697	0.000246427	0.000478463
	424.5	0.00480753	0.00363783	0.00215873	0.0012424	0.000775387	0.00057946	0.000210197	0.000168747	0.00030708	0.000520387
	425	0.00508187	0.00387593	0.00228787	0.0012808	0.000800383	0.00061636	0.00016729	0.000153427	0.000346167	0.00055166
	425.5	0.0053634	0.00412907	0.00241067	0.0013389	0.00080027	0.00061038	0.000206407	0.000205283	0.000356973	0.00057075
	426	0.0056805	0.00438787	0.00253213	0.00141753	0.00079855	0.00057372	0.000303807	0.00027305	0.000395097	0.000585307
	426.5	0.00602373	0.00462453	0.00268037	0.0015214	0.00080206	0.00054267	0.00039956	0.000329867	0.000474473	0.000620277
	427	0.00637207	0.00482833	0.0028389	0.00161773	0.00081612	0.00051013	0.00045735	0.000334477	0.000560673	0.00065058
	427.5	0.00674773	0.00504963	0.003011	0.00168283	0.000877617	0.0005209	0.0004614	0.000338007	0.000581333	0.000681143
	428	0.0071484	0.00533687	0.00322047	0.0017481	0.000946497	0.00053523	0.000457177	0.00035438	0.00055074	0.000727083
	428.5	0.0076026	0.00570817	0.003437	0.00185367	0.00106097	0.00060397	0.000491827	0.0004411	0.000515073	0.000789527
	429	0.00813777	0.00613323	0.00369513	0.00198873	0.00116077	0.00061008	0.000503513	0.000507977	0.000498973	0.00084122
	429.5	0.00870643	0.00656443	0.003953	0.0021431	0.0012524	0.00064106	0.000508877	0.000506863	0.000563773	0.00087026
	430	0.00934043	0.00700133	0.00420037	0.00227787	0.00135743	0.00064864	0.000480373	0.000493763	0.00063822	0.000896587
	430.5	0.0100486	0.00749897	0.004472	0.00238663	0.00145373	0.00063782	0.000492197	0.00051181	0.000676243	0.00092082
	431	0.0108053	0.00806103	0.00480257	0.0025426	0.00157353	0.00065833	0.00054478	0.000586703	0.00065311	0.00096093
	431.5	0.0115993	0.00863927	0.00518607	0.0027138	0.00168777	0.00068709	0.00060548	0.00068771	0.000601133	0.00101607
	432	0.012457	0.0092648	0.00561943	0.0029217	0.0017737	0.00072263	0.00068554	0.000738057	0.000572927	0.00105822
	432.5	0.013366	0.00989697	0.00603757	0.00314947	0.00187287	0.00076316	0.000722547	0.000738927	0.000655067	0.00114561
	433	0.0143477	0.0105964	0.00647333	0.0033775	0.00197643	0.00077884	0.000768037	0.00073852	0.000806167	0.00127493
	433.5	0.01541	0.0113627	0.006915	0.00360857	0.00210063	0.00079271	0.00082891	0.000764503	0.000977363	0.001414
	434	0.016531	0.012189	0.00741437	0.0038307	0.00222903	0.00082974	0.000931183	0.000807937	0.00112182	0.00154767
	434.5	0.0177033	0.0130443	0.0079459	0.0040604	0.00235853	0.00091578	0.00104753	0.000867233	0.0011934	0.0016557
	435	0.0189663	0.013938	0.00851997	0.00430363	0.0025227	0.0010262	0.0011662	0.00093494	0.0012293	0.00174083
	435.5	0.02043	0.0149527	0.009199	0.0046187	0.0027009	0.0011444	0.00127233	0.000998543	0.00126247	0.00185333
	436	0.0221447	0.0161223	0.00995283	0.00498867	0.00291747	0.0012622	0.00138113	0.00109301	0.0013009	0.00198023
	436.5	0.0241113	0.0174887	0.0108174	0.00542043	0.00317127	0.0013656	0.00149687	0.0012111	0.00138673	0.00210353
	437	0.0262933	0.0190187	0.011777	0.005903	0.00342297	0.0014458	0.00162243	0.001334	0.00153637	0.0022426
	437.5	0.0285457	0.0206143	0.012774	0.00639763	0.00371637	0.0015674	0.0017201	0.00144813	0.00173313	0.002384
	438	0.0309517	0.022328	0.0138313	0.0068912	0.00407037	0.0016658	0.0018584	0.0015782	0.00194823	0.0025698
	438.5	0.0334477	0.0241307	0.0149683	0.0074131	0.0044754	0.0017867	0.0020228	0.0017436	0.00213053	0.00276023
	439	0.036131	0.0260753	0.0161707	0.00797743	0.004897	0.0019062	0.0021861	0.0018982	0.0022678	0.00296587
	439.5	0.039015	0.0281847	0.017458	0.0085969	0.00528757	0.0020013	0.00237193	0.00204413	0.00242413	0.00320143
	440	0.042097	0.030447	0.0188537	0.0092742	0.00565757	0.0020895	0.00257197	0.00214963	0.0026471	0.00346437
	440.5	0.0454943	0.0329117	0.020401	0.0100535	0.00615827	0.0022063	0.00280717	0.00228443	0.0028913	0.00379783
	441	0.0491137	0.03554	0.0220913	0.0109168	0.00674543	0.0024102	0.00311923	0.00246583	0.00313423	0.00414307
	441.5	0.0530507	0.0383883	0.023951	0.0118717	0.00738507	0.0026802	0.00340477	0.0026924	0.0034125	0.00449457
	442	0.0572957	0.0414817	0.025932	0.012869	0.00803727	0.0029874	0.00367877	0.00291097	0.0037235	0.0048479
	442.5	0.061801	0.0447473	0.0280287	0.013914	0.00862717	0.0032479	0.00397827	0.00316507	0.00403987	0.00524327
	443	0.0666133	0.0482697	0.0303357	0.015022	0.0092468	0.0034466	0.004307	0.0034347	0.00432133	0.0056706
	443.5	0.0718097	0.0520717	0.0328577	0.0162453	0.0099147	0.0037003	0.004685	0.00373653	0.00462033	0.00616057
	444	0.077513	0.0562367	0.0356543	0.0176173	0.0106553	0.0039943	0.00506337	0.00407963	0.00502207	0.00670957
	444.5	0.0836493	0.060782	0.038632	0.0191107	0.011533	0.0043482	0.00545277	0.00442623	0.00548893	0.007282
	445	0.0901843	0.0656213	0.0417937	0.0207583	0.012538	0.0047693	0.00586163	0.00482113	0.00595903	0.00787503
	445.5	0.0970867	0.07076	0.045194	0.0224993	0.0136777	0.0051946	0.0063582	0.0052679	0.00640053	0.00845953
	446	0.104578	0.0763943	0.0489517	0.0243853	0.014917	0.0056786	0.00691253	0.00574723	0.0068866	0.00907603
	446.5	0.112893	0.0826583	0.0531607	0.0265037	0.016261	0.0062026	0.00751523	0.00627347	0.00750977	0.00980737
	447	0.12185	0.089416	0.0577507	0.0287983	0.0177637	0.0068279	0.00818337	0.00686303	0.00822373	0.010608
	447.5	0.131327	0.0966203	0.0626723	0.031302	0.019347	0.0075119	0.00893207	0.00748287	0.0090181	0.0114983
	448	0.14151	0.104308	0.068038	0.0340347	0.0210733	0.0082483	0.00977113	0.0081567	0.00990367	0.0124673
	448.5	0.15262	0.112717	0.073898	0.0370773	0.0228737	0.0089984	0.0106854	0.008866	0.0108219	0.0134673
	449	0.165077	0.122183	0.0804143	0.0405093	0.024863	0.0097931	0.0116527	0.00963913	0.0117498	0.014614
	449.5	0.17864	0.13246	0.0875103	0.0442347	0.0270503	0.010658	0.0126713	0.0105108	0.012731	0.0158723
	450	0.193043	0.143553	0.095169	0.0482177	0.029476	0.011597	0.013786	0.0114687	0.013793	0.0172607
	450.5	0.208103	0.155217	0.103279	0.0524473	0.0321233	0.012602	0.0149837	0.0125417	0.014971	0.0188023
	451	0.22375	0.167897	0.112159	0.05711	0.0351293	0.013712	0.0163457	0.013724	0.0163023	0.0204913
	451.5	0.237213	0.181793	0.121918	0.0622223	0.0384517	0.014971	0.01786	0.015015	0.0177433	0.0223667
	452	0.246243	0.196657	0.13232	0.0677	0.0420057	0.016363	0.0194407	0.016407	0.0193047	0.0243593
	452.5	0.250007	0.212333	0.143263	0.0735733	0.0457547	0.017843	0.0211537	0.017915	0.0210653	0.0264273
	453	0.250273	0.226627	0.153717	0.0798743	0.0496943	0.019479	0.0230157	0.0195047	0.0229433	0.0286323
	453.5	0.249997	0.23793	0.163037	0.0867293	0.054024	0.021219	0.0250333	0.0211907	0.0249797	0.031066
	454	0.249943	0.245337	0.170443	0.0939917	0.0586997	0.023038	0.0271843	0.022943	0.0271207	0.0337087
	454.5	0.249227	0.24799	0.175623	0.101559	0.0636267	0.02497	0.0293483	0.024787	0.0292913	0.036471
	455	0.24808	0.24808	0.17884	0.109489	0.0687733	0.026955	0.0316127	0.0267903	0.0315617	0.0393287
	455.5	0.246323	0.24646	0.180203	0.117646	0.0740483	0.029019	0.0339913	0.028882	0.0339873	0.042253
	456	0.24481	0.24493	0.180443	0.126053	0.0794003	0.031167	0.0364593	0.0310627	0.0364527	0.0452783
	456.5	0.243303	0.2434	0.17965	0.134553	0.0848593	0.033351	0.0389933	0.033205	0.0389727	0.0483817
	457	0.242093	0.24217	0.17876	0.14332	0.090422	0.035569	0.041579	0.0353693	0.041477	0.051566
	457.5	0.24091	0.24099	0.17789	0.151863	0.0960717	0.037796	0.044208	0.037527	0.0440003	0.054774
	458	0.239537	0.23963	0.17686	0.15847	0.101537	0.039803	0.046714	0.039575	0.046487	0.0578667
	458.5	0.23839	0.2385	0.17602	0.162957	0.10679	0.041821	0.0491227	0.0415873	0.048957	0.060859
	459	0.237157	0.23728	0.17514	0.165377	0.11174	0.043695	0.0513493	0.0435047	0.0512373	0.0637077
	459.5	0.23607	0.23619	0.17435	0.166797	0.116283	0.04553	0.0534267	0.0453407	0.0533187	0.0664293
	460	0.235113	0.23524	0.17366	0.168173	0.120483	0.047202	0.0553273	0.047044	0.0552407	0.0689817
	460.5	0.234063	0.23421	0.17284	0.169217	0.124067	0.048513	0.056972	0.04844	0.056907	0.0712173
	461	0.233243	0.23343	0.17218	0.17013	0.12704	0.049588	0.058318	0.0495363	0.0583127	0.0731423
	461.5	0.232597	0.23281	0.17168	0.17089	0.129363	0.050317	0.0594037	0.050346	0.0594183	0.0746917
	462	0.231787	0.232	0.17107	0.171173	0.13094	0.050877	0.060151	0.0508227	0.06013	0.075818
	462.5	0.231263	0.23145	0.17069	0.171323	0.13183	0.05125	0.060611	0.0510873	0.060544	0.0765243
	463	0.230773	0.23094	0.17032	0.171137	0.13186	0.051271	0.060649	0.051047	0.0605673	0.076781
	463.5	0.230553	0.2307	0.17014	0.170957	0.13137	0.051023	0.060407	0.0508557	0.0603737	0.0767833
	464	0.229697	0.22984	0.1695	0.17027	0.130217	0.050331	0.059779	0.0503943	0.059908	0.076407
	464.5	0.228593	0.22874	0.16869	0.169107	0.128387	0.049393	0.0588563	0.0495337	0.05909	0.0756003
	465	0.227577	0.22772	0.16797	0.167623	0.125897	0.048258	0.0576917	0.048413	0.0580003	0.0743217
	465.5	0.22664	0.22678	0.16729	0.165857	0.122717	0.046803	0.056249	0.0469953	0.0566377	0.0726497
	466	0.22612	0.22627	0.16687	0.164083	0.119137	0.04523	0.0545813	0.04545	0.0551077	0.0707523
	466.5	0.225507	0.22566	0.16635	0.16219	0.115247	0.04353	0.052771	0.04391	0.053469	0.0687077
	467	0.224837	0.22501	0.16577	0.16011	0.111077	0.041815	0.0507577	0.042207	0.0515543	0.0664503
	467.5	0.224577	0.22476	0.16559	0.15816	0.106626	0.040091	0.0486933	0.0404723	0.0494817	0.0639327
	468	0.224073	0.22425	0.16529	0.155997	0.10199	0.038321	0.0465993	0.0386877	0.047301	0.0613337
	468.5	0.22394	0.22411	0.16528	0.153563	0.0973423	0.03655	0.0445617	0.03693	0.0452043	0.058761
	469	0.224103	0.22426	0.16546	0.14994	0.0927037	0.034763	0.0425813	0.0352307	0.04313	0.0562523
	469.5	0.22375	0.22388	0.1652	0.14474	0.088194	0.033028	0.0405703	0.033541	0.0410727	0.0537037
	470	0.222707	0.22281	0.16442	0.138053	0.0838173	0.031342	0.0385347	0.031821	0.0390497	0.051069
	470.5	0.22141	0.2215	0.16344	0.131177	0.0797273	0.029829	0.0365847	0.0302287	0.0371303	0.048528
	471	0.21993	0.22001	0.16235	0.124787	0.0758977	0.028399	0.034745	0.0287687	0.035378	0.046143
	471.5	0.219097	0.21918	0.16176	0.119043	0.0723497	0.027117	0.0330773	0.0274647	0.033791	0.044035
	472	0.218087	0.21817	0.16103	0.113772	0.0690773	0.025882	0.0315403	0.0262687	0.032314	0.0420713
	472.5	0.216897	0.21698	0.16015	0.108826	0.0660437	0.024768	0.0301653	0.025097	0.0309283	0.040238
	473	0.215757	0.21586	0.15899	0.104323	0.0633283	0.023717	0.0289793	0.024032	0.0296977	0.038563
	473.5	0.214727	0.21484	0.157397	0.100133	0.0607937	0.022753	0.0279063	0.023069	0.028582	0.037014
	474	0.213807	0.21393	0.15545	0.096258	0.058464	0.021877	0.0268933	0.0222147	0.027542	0.0356233
	474.5	0.212893	0.21301	0.15323	0.092664	0.056311	0.021109	0.0259187	0.0214623	0.026584	0.034338
	475	0.211567	0.21166	0.150913	0.089319	0.054354	0.020451	0.0250067	0.0207697	0.0256277	0.033106
	475.5	0.209773	0.20985	0.148473	0.0862943	0.0525747	0.019845	0.0241813	0.020098	0.0247703	0.031946
	476	0.208133	0.2082	0.146237	0.0834983	0.0508873	0.019299	0.023429	0.0194683	0.0239637	0.030875
	476.5	0.20699	0.207007	0.144247	0.0809383	0.0493127	0.018791	0.0227467	0.018888	0.0232813	0.0299107
	477	0.20637	0.206	0.142313	0.0785667	0.0478357	0.018278	0.0221353	0.0183463	0.02265	0.0290277
	477.5	0.205837	0.204637	0.140213	0.0763757	0.0464307	0.017827	0.0215307	0.017843	0.02204	0.0281973
	478	0.204523	0.202213	0.13749	0.074194	0.045039	0.01736	0.020911	0.017359	0.0214067	0.0273777
	478.5	0.20242	0.198763	0.134243	0.0718873	0.043572	0.016869	0.0202397	0.0168807	0.0207413	0.0265363
	479	0.200117	0.194933	0.130777	0.069467	0.0420987	0.016395	0.019572	0.01639	0.0200743	0.0256717
	479.5	0.198183	0.19089	0.127063	0.0669807	0.0405987	0.015933	0.0189077	0.015864	0.019414	0.0247733
	480	0.19709	0.18673	0.123267	0.0646247	0.0392277	0.015516	0.0182687	0.0153027	0.0187597	0.023914
	480.5	0.195927	0.181653	0.119143	0.0623203	0.037845	0.015044	0.0176047	0.0147767	0.01809	0.0231
	481	0.194463	0.17555	0.114663	0.059997	0.036389	0.014484	0.0169143	0.0142543	0.0173963	0.0222793
	481.5	0.192493	0.16884	0.110096	0.0576813	0.0349107	0.013898	0.0162453	0.0137353	0.016679	0.0214163
	482	0.19039	0.161897	0.105486	0.0553017	0.0334037	0.013298	0.0155917	0.0132013	0.0159787	0.0205173
	482.5	0.18845	0.155113	0.10096	0.0530073	0.0320263	0.012749	0.014974	0.012691	0.015318	0.0196447
	483	0.18583	0.148333	0.096582	0.0507897	0.0306727	0.012194	0.014367	0.012204	0.0147137	0.0188317
	483.5	0.181653	0.141537	0.092259	0.0485977	0.029342	0.011682	0.0137663	0.0117073	0.0140987	0.0180327
	484	0.17556	0.13498	0.0881123	0.0464867	0.028061	0.011243	0.013168	0.0111957	0.0135293	0.017258
	484.5	0.168007	0.128603	0.084061	0.0443987	0.0268427	0.010818	0.012606	0.0107118	0.0129043	0.0164867
	485	0.15986	0.12239	0.0800963	0.0423597	0.0256683	0.010423	0.0120523	0.0102746	0.0123087	0.015764
	485.5	0.15196	0.116457	0.0763213	0.0404553	0.0245107	0.010008	0.011547	0.00989057	0.0117567	0.0151077
	486	0.14429	0.110723	0.072716	0.038653	0.0234173	0.0096276	0.0110733	0.00951577	0.0112535	0.014451
	486.5	0.13709	0.105383	0.0693577	0.0369657	0.0223963	0.009256	0.0106234	0.00911697	0.0108269	0.0138267
	487	0.13038	0.100421	0.0662717	0.035385	0.0214623	0.0089478	0.0101918	0.0087561	0.0104165	0.0132353
	487.5	0.124183	0.0958783	0.0634347	0.0339167	0.020649	0.0087163	0.00977483	0.00845907	0.0100004	0.0126903
	488	0.118307	0.0915147	0.0607537	0.03255	0.0198547	0.0084869	0.00937713	0.00816793	0.00957123	0.0121937
	488.5	0.11281	0.0874407	0.0582137	0.031284	0.019127	0.0082188	0.00903647	0.00791757	0.00917907	0.0117433
	489	0.10758	0.0835887	0.0558377	0.030103	0.018434	0.0079335	0.00870363	0.0076644	0.0088321	0.0113133
	489.5	0.10277	0.0800787	0.053675	0.0290317	0.0178293	0.0076732	0.00841353	0.00745643	0.00857337	0.0109357
	490	0.0983533	0.0768503	0.051743	0.0280557	0.017323	0.007499	0.0081321	0.00728483	0.0083244	0.0105915
	490.5	0.0942717	0.0739007	0.0499763	0.027157	0.0168503	0.0073406	0.00788883	0.00710957	0.00805773	0.0102557
	491	0.0905093	0.0711487	0.048311	0.0263287	0.0163843	0.0071895	0.00769173	0.00693207	0.007778	0.00994337
	491.5	0.086938	0.068524	0.0467233	0.0255653	0.0159253	0.0070281	0.0075078	0.00676097	0.0075354	0.00964263
	492	0.0837083	0.0661353	0.045286	0.0249017	0.0155067	0.0068876	0.00733707	0.0065945	0.0073464	0.0093651
	492.5	0.080709	0.0639127	0.04398	0.0243107	0.01517	0.0067314	0.00717307	0.006459	0.00717777	0.0091503
	493	0.0779017	0.061899	0.0427933	0.0237463	0.0148777	0.0066254	0.00699653	0.00634917	0.0070557	0.00896367
	493.5	0.0752817	0.060027	0.0417213	0.0232247	0.0146333	0.0065278	0.00686287	0.00627423	0.00694567	0.0087964
	494	0.072774	0.0582207	0.0407063	0.0227383	0.0143967	0.0064645	0.0067401	0.00623537	0.00685	0.00864353
	494.5	0.070332	0.0564383	0.0397167	0.0222853	0.014113	0.0064052	0.00661673	0.00617257	0.00673157	0.00849857
	495	0.0679647	0.054684	0.0387037	0.0218213	0.0137847	0.0063532	0.00647687	0.0060797	0.00657577	0.00834343
	495.5	0.0656447	0.052971	0.0376827	0.0213633	0.013451	0.0063402	0.00634693	0.00598663	0.00641103	0.00818613
	496	0.06344	0.0513387	0.036689	0.0209093	0.01316	0.0062742	0.006231	0.00590593	0.00625967	0.0079995
	496.5	0.061343	0.0498483	0.0357853	0.0204973	0.0129047	0.006211	0.00614503	0.0058264	0.00614367	0.00780487
	497	0.0593513	0.048475	0.0349473	0.0201243	0.0126727	0.0061249	0.00603843	0.00573727	0.00605577	0.00763893
	497.5	0.0574523	0.047139	0.034123	0.0197473	0.0124937	0.0060319	0.00592037	0.00564533	0.00597163	0.0075182
	498	0.0555527	0.0457467	0.0332753	0.0193587	0.0123153	0.0059286	0.00582737	0.0055759	0.0058747	0.00743477
	498.5	0.0536487	0.0442877	0.0323683	0.018942	0.0121723	0.0058307	0.00574203	0.0055318	0.00577707	0.00735617
	499	0.0516433	0.042761	0.0314557	0.0185183	0.0119863	0.0057443	0.00566053	0.00547573	0.00566033	0.0072672
	499.5	0.0496537	0.041259	0.0305513	0.0180797	0.0117623	0.0057122	0.00558523	0.00539297	0.0055547	0.00713163
	500	0.0477473	0.039835	0.0296747	0.017653	0.0115613	0.005673	0.00548523	0.00530857	0.00543513	0.00697023
	500.5	0.0459353	0.0385	0.028815	0.0172357	0.011313	0.0055964	0.0053974	0.00520783	0.0053286	0.00680737
	501	0.0442237	0.037203	0.0279487	0.0168153	0.0110723	0.0055447	0.00529627	0.00513107	0.00524907	0.006649
	501.5	0.0424923	0.0358727	0.0270587	0.0163793	0.0108023	0.005467	0.0051781	0.00502857	0.005172	0.00654157
	502	0.0407863	0.034561	0.026187	0.0159513	0.0105284	0.0053972	0.00505677	0.0049378	0.00509733	0.0064224
	502.5	0.039041	0.0332613	0.0253233	0.0155177	0.0103188	0.0053012	0.00494	0.00486417	0.0049901	0.0062819
	503	0.0373113	0.031996	0.0244857	0.015082	0.0100859	0.0051742	0.00479867	0.0047988	0.00483097	0.00612597
	503.5	0.0356773	0.0307733	0.0236763	0.01464	0.00984523	0.0050433	0.00464773	0.00476727	0.0046519	0.00598737
	504	0.0341773	0.0296463	0.022908	0.0142397	0.00961523	0.0049145	0.00449663	0.0047021	0.00448407	0.00585047
	504.5	0.032781	0.0285643	0.0221437	0.013858	0.00938223	0.0048213	0.0044223	0.0046324	0.00439703	0.00571403
	505	0.0314337	0.0274937	0.0213853	0.0134943	0.00918603	0.0047322	0.0043935	0.00455233	0.00432787	0.0055939
	505.5	0.0301187	0.0264177	0.0206703	0.0131157	0.00896987	0.0046432	0.004349	0.0044719	0.0042925	0.0054733
	506	0.028836	0.0253617	0.0200207	0.012749	0.00876243	0.004521	0.00425493	0.00440267	0.00422727	0.0053973
	506.5	0.027613	0.0243863	0.0194587	0.0124223	0.00858893	0.0044099	0.00414823	0.00432223	0.0041507	0.005318
	507	0.0264497	0.023464	0.0188953	0.0121183	0.00844337	0.0043616	0.0040733	0.0042663	0.00406047	0.00523277
	507.5	0.025404	0.0226313	0.0183243	0.0118257	0.00831177	0.004339	0.00400963	0.0042194	0.00395103	0.00513857
	508	0.024409	0.021865	0.0177467	0.0115417	0.00815717	0.0043272	0.00392843	0.00419283	0.00385807	0.00504773
	508.5	0.0234853	0.0211547	0.0172377	0.0112877	0.00800657	0.0042666	0.00387443	0.0041528	0.00380967	0.00497643
	509	0.0225723	0.020426	0.0167387	0.0110557	0.00787073	0.0041856	0.00385713	0.00409627	0.00372583	0.00490463
	509.5	0.0217053	0.019707	0.0162653	0.01082	0.00777663	0.004115	0.00386813	0.00402663	0.00364547	0.0048231
	510	0.0209027	0.0190517	0.0158107	0.0105835	0.0076662	0.004049	0.0038388	0.00397357	0.00353777	0.0047355
	510.5	0.020143	0.018436	0.0153877	0.0103319	0.00753817	0.0040254	0.00378447	0.00394777	0.00346547	0.00466803
	511	0.0194253	0.0178587	0.0150077	0.0101012	0.00738323	0.0040203	0.00371527	0.0039181	0.00344167	0.00462287
	511.5	0.018741	0.017269	0.0146083	0.0099079	0.00722093	0.0039959	0.00368087	0.0039048	0.00344303	0.00458037
	512	0.018108	0.0167627	0.0142047	0.00973273	0.0071386	0.0039992	0.00365737	0.00387143	0.0034725	0.00457087
	512.5	0.0175007	0.016286	0.013832	0.00954287	0.0070603	0.0039785	0.00362873	0.00385657	0.0034744	0.0045565
	513	0.0169297	0.0158257	0.0135053	0.0093395	0.00699803	0.0039357	0.0035785	0.00385603	0.00346353	0.0045364
	513.5	0.016383	0.0153667	0.0131853	0.0091297	0.00691647	0.0038935	0.00351797	0.00385083	0.0034307	0.00448843
	514	0.015873	0.0149053	0.012875	0.00896017	0.00681177	0.0038784	0.0034781	0.0038472	0.00343993	0.00442347
	514.5	0.0153983	0.014487	0.012559	0.00880243	0.00672877	0.0039059	0.00346247	0.00383623	0.00342503	0.00439057
	515	0.0149023	0.0140387	0.012256	0.00862283	0.00661217	0.0039745	0.003441	0.00381547	0.00336547	0.00436757
	515.5	0.0143947	0.013582	0.011972	0.008422	0.00650077	0.0039493	0.00342527	0.00377157	0.00327157	0.00435527
	516	0.0138493	0.013128	0.0116593	0.0082203	0.00641317	0.0038583	0.00341973	0.0037315	0.00319893	0.00433273
	516.5	0.013328	0.012717	0.0113652	0.0080165	0.0063286	0.0037222	0.00342253	0.0036954	0.0031708	0.00426903
	517	0.012858	0.012343	0.0110644	0.00783673	0.00625707	0.0036064	0.00340523	0.00366937	0.0031258	0.0042258
	517.5	0.0124307	0.011964	0.0107536	0.00767627	0.00614133	0.0035455	0.0033611	0.00363093	0.0030545	0.00416063
	518	0.0120183	0.011558	0.0104357	0.00753583	0.00599233	0.0034945	0.0033093	0.0035734	0.003005	0.0041006
	518.5	0.0116057	0.011148	0.010099	0.00738407	0.0058251	0.0034206	0.00327633	0.00351573	0.00295677	0.00405143
	519	0.0112083	0.0107683	0.00977377	0.0072176	0.00566633	0.0033174	0.00326123	0.00348483	0.00296003	0.00401177
	519.5	0.0108407	0.0104324	0.00947183	0.0070278	0.00555627	0.0032295	0.0032446	0.00344123	0.0029656	0.00399047
	520	0.0105007	0.010132	0.00916017	0.00684303	0.00546917	0.0031922	0.0032235	0.00339003	0.002966	0.0039642
	520.5	0.0101443	0.00982373	0.00887767	0.0066614	0.00536613	0.0031624	0.00319413	0.00332433	0.0029552	0.0038949
	521	0.00975567	0.00949173	0.0085991	0.00647147	0.00522823	0.0031265	0.00314617	0.0032839	0.00287147	0.00382567
	521.5	0.0093552	0.0091563	0.00832263	0.0062753	0.0050581	0.0030616	0.0030853	0.00324563	0.00278213	0.0037384
	522	0.00898993	0.00884493	0.00803203	0.00609703	0.0049221	0.0030112	0.0030272	0.00321793	0.00270687	0.00365577
	522.5	0.00867013	0.00856513	0.00772727	0.00593247	0.00480457	0.002957	0.00295497	0.00315517	0.00266467	0.00357683
	523	0.00837787	0.00826617	0.00742833	0.00576057	0.0047058	0.0028723	0.00287973	0.0030862	0.002649	0.00349733
	523.5	0.00809653	0.00796997	0.00718067	0.00557187	0.00459773	0.0027925	0.00281273	0.0030274	0.00260203	0.00344023
	524	0.00781347	0.0076805	0.0069316	0.0053718	0.00447263	0.0027206	0.00274803	0.00295133	0.00252763	0.00336927
	524.5	0.0075169	0.0073969	0.00671307	0.00520013	0.00432007	0.0026436	0.00270527	0.00286217	0.00244173	0.00329203
	525	0.00721323	0.0071297	0.006494	0.0050511	0.00417017	0.0026061	0.00263607	0.0027652	0.0023421	0.00319757
	525.5	0.00688523	0.00686333	0.0062772	0.00488177	0.0040506	0.0025567	0.00254113	0.00270017	0.0022535	0.00312353
	526	0.00661467	0.00663147	0.0060652	0.0047063	0.00397243	0.0025052	0.00244247	0.00266857	0.0022113	0.0030664
	526.5	0.0063918	0.0064091	0.00582807	0.0045247	0.0039006	0.0024294	0.00235427	0.00263643	0.00216623	0.00299677
	527	0.0061748	0.0061637	0.00560413	0.00437613	0.0038	0.0023267	0.0022851	0.0025412	0.0021508	0.0029091
	527.5	0.00599507	0.00594977	0.00541843	0.00425153	0.00369073	0.0022365	0.00221127	0.00241157	0.00211643	0.00281053
	528	0.0057912	0.00573827	0.00526203	0.00411683	0.0035654	0.0021862	0.00214093	0.002297	0.00206873	0.00272483
	528.5	0.0056076	0.0055726	0.00511177	0.00397623	0.0034244	0.0021386	0.00210027	0.002214	0.0020238	0.00265637
	529	0.00542967	0.0054167	0.00493577	0.0038585	0.0032773	0.0020903	0.002075	0.00218713	0.0019869	0.00257383
	529.5	0.005262	0.0052691	0.00475427	0.00374603	0.0031364	0.0020567	0.00204893	0.00214923	0.00193627	0.0025032
	530	0.00510013	0.0051148	0.00460297	0.00363807	0.0030274	0.0019995	0.0020028	0.00211717	0.0018722	0.00243727
	530.5	0.0049401	0.00493427	0.0044784	0.0035132	0.00294167	0.0019517	0.00193867	0.00208003	0.0017799	0.00237477
	531	0.00473917	0.00474197	0.00436037	0.0034058	0.00285393	0.0018978	0.00188193	0.0020554	0.001699	0.00232137
	531.5	0.004558	0.00456363	0.00422257	0.00333107	0.00277103	0.0018525	0.00181317	0.0020356	0.00165417	0.0022603
	532	0.00439347	0.00440893	0.00406923	0.0032741	0.00270173	0.0018246	0.0017588	0.00201037	0.00162333	0.00221213
	532.5	0.0042713	0.00428093	0.00393837	0.003186	0.0026417	0.0018048	0.0017237	0.00195773	0.0016049	0.00215197
	533	0.0041721	0.00416413	0.00381803	0.00306047	0.00257087	0.0017476	0.0016586	0.00191047	0.0015656	0.00208203
	533.5	0.0040772	0.00406103	0.00369683	0.00292347	0.00246603	0.0016935	0.00157523	0.00185793	0.0015063	0.002022
	534	0.0039803	0.00396383	0.00356917	0.0028159	0.0023535	0.0016168	0.00146983	0.001778	0.00146213	0.0019517
	534.5	0.00383033	0.00383483	0.00342927	0.00273717	0.00227643	0.0015463	0.0014016	0.00168503	0.00142853	0.00187247
	535	0.00367483	0.00371247	0.00332883	0.00265973	0.00226167	0.0014977	0.00140803	0.0015701	0.00141923	0.00179113
	535.5	0.0035351	0.00356487	0.00322707	0.00258603	0.002238	0.0014759	0.00143367	0.001518	0.00139483	0.00170823
	536	0.00342517	0.00342123	0.0031402	0.00251523	0.0021675	0.0014147	0.0014662	0.0015186	0.0013581	0.00166817
	536.5	0.00334693	0.00330427	0.00302727	0.00244593	0.00204577	0.001318	0.00145223	0.0015179	0.0012823	0.00163837
	537	0.00327583	0.00321833	0.0029271	0.00238007	0.0019246	0.001246	0.00140363	0.00148603	0.0012507	0.00161653
	537.5	0.00321247	0.0031644	0.00284347	0.0023073	0.00185987	0.0012235	0.0013503	0.00142567	0.00118243	0.00160023
	538	0.00315737	0.0031139	0.00277397	0.00224723	0.00181203	0.0012803	0.00128283	0.00137673	0.0011382	0.00158307
	538.5	0.0030792	0.0030597	0.0027128	0.00217797	0.00178873	0.0012934	0.0012378	0.00131407	0.00111093	0.00153797
	539	0.0030003	0.0030046	0.00261893	0.00209827	0.0017443	0.0012359	0.001199	0.00125967	0.00107569	0.0014747
	539.5	0.00292277	0.00295047	0.0025247	0.00202257	0.0016863	0.0011679	0.00116533	0.00119763	0.00107497	0.00139237
	540	0.00284557	0.00285763	0.00243883	0.0019615	0.00164057	0.0011276	0.00111363	0.00115503	0.00101027	0.0013356
	540.5	0.00277507	0.0027494	0.00236113	0.00190697	0.00160057	0.0011154	0.00106153	0.0011001	0.000941857	0.00132447
	541	0.00271533	0.00265677	0.0022761	0.00185337	0.00157963	0.0011379	0.00101418	0.00102946	0.000917507	0.0013199
	541.5	0.00265017	0.00255407	0.0021896	0.00180473	0.00155773	0.0011166	0.0009937	0.000990433	0.000897737	0.0013019
	542	0.00258297	0.00247873	0.00213287	0.00176757	0.00152453	0.001064	0.00096657	0.00100141	0.000891163	0.00123553
	542.5	0.00250843	0.00240593	0.00210473	0.00173533	0.00149553	0.00095664	0.000947033	0.00101424	0.000829857	0.0011716
	543	0.0024455	0.0023519	0.0021076	0.00169963	0.0014583	0.00086003	0.00091936	0.00101418	0.00074206	0.00111953
	543.5	0.00238823	0.00231557	0.0020668	0.00165937	0.00143013	0.0008224	0.000911267	0.000993447	0.000701717	0.00110053
	544	0.00233133	0.00228527	0.0020008	0.00161623	0.00140583	0.00087379	0.000867347	0.000979743	0.000676217	0.0010776
	544.5	0.00227637	0.00225303	0.00193893	0.00156943	0.0013517	0.00092659	0.000822707	0.00093729	0.00072677	0.00103343
	545	0.00222907	0.0022157	0.001879	0.00153303	0.0012981	0.00092466	0.00075725	0.000888673	0.00078298	0.00098882
	545.5	0.0021777	0.0021647	0.00183947	0.00148397	0.00120337	0.00090157	0.000735287	0.00085704	0.000825413	0.000945187
	546	0.00213297	0.0021159	0.00179223	0.00144493	0.00111907	0.00086375	0.000730663	0.00084069	0.000800783	0.000928907
	546.5	0.00209683	0.00207877	0.0017297	0.00141293	0.00105597	0.00086097	0.000738273	0.00083564	0.00072675	0.000899987
	547	0.00206587	0.002054	0.00166007	0.0013897	0.00101575	0.00086376	0.000747537	0.000814027	0.0006429	0.00087771
	547.5	0.00204733	0.0020404	0.00159307	0.0013802	0.00102427	0.00085404	0.000754863	0.000800263	0.000589807	0.0008641
	548	0.00201527	0.0020263	0.0015582	0.00136367	0.00103383	0.00088154	0.00076014	0.00079369	0.000595577	0.00085637
	548.5	0.00198477	0.00198363	0.0015509	0.00132697	0.0010388	0.0008743	0.00071986	0.000779207	0.000582273	0.000845613
	549	0.00193513	0.00191107	0.00153653	0.00127617	0.00100709	0.00086076	0.00065562	0.00077375	0.00058011	0.00080979
	549.5	0.0018697	0.00182363	0.00151557	0.00120057	0.000988113	0.00080627	0.00060646	0.00074587	0.000561243	0.00073346
	550	0.00181393	0.0017607	0.0014636	0.0011469	0.0009679	0.00076207	0.000595137	0.000705123	0.00057064	0.000665083
	550.5	0.0017867	0.00175463	0.00139987	0.00111743	0.00097761	0.0007278	0.000612047	0.000657313	0.000615863	0.00063249
	551	0.0017653	0.0017293	0.00132503	0.00110917	0.00093881	0.00067721	0.00062712	0.00062853	0.000638357	0.000652553
	551.5	0.00172913	0.0016987	0.00128587	0.0010912	0.000888813	0.00062549	0.00059685	0.000594753	0.00059825	0.000674727
	552	0.0016824	0.00164393	0.00127117	0.00106613	0.00082048	0.00057913	0.000560933	0.000568747	0.000545223	0.000688903
	552.5	0.00164763	0.0016049	0.00127897	0.00103999	0.00076052	0.00061605	0.000549907	0.000563527	0.00048714	0.00068584
	553	0.00159753	0.00157803	0.001277	0.00101745	0.000734613	0.000631	0.000547647	0.0005847	0.000470257	0.000680067
	553.5	0.00155393	0.00153153	0.00122797	0.00100855	0.000722517	0.00062296	0.000539257	0.00062508	0.000487443	0.00068297
	554	0.00152047	0.00149053	0.0011649	0.000998803	0.000739383	0.00063055	0.000517223	0.000628423	0.000493923	0.00065632
	554.5	0.00152487	0.00147303	0.00109987	0.0009815	0.00074877	0.00061658	0.000487083	0.000607593	0.000497933	0.000652587
	555	0.00154263	0.0014796	0.00109403	0.000964087	0.000725307	0.00061249	0.000466243	0.00056296	0.00048413	0.00064238
	555.5	0.00154243	0.00149463	0.00109887	0.00094153	0.000705843	0.00057293	0.000435577	0.000516057	0.0004828	0.000638623
	556	0.00151637	0.00147853	0.00108883	0.00093073	0.000677283	0.00057778	0.000408147	0.000484977	0.000472823	0.000642073
	556.5	0.001484	0.00146733	0.00103627	0.000925693	0.000667897	0.00059315	0.000363907	0.00046587	0.00046662	0.000621633
	557	0.0014496	0.00145943	0.00099405	0.000911283	0.000632457	0.0005769	0.000329373	0.000454833	0.000425953	0.00060644
	557.5	0.00143007	0.00145743	0.000944423	0.000886613	0.000598163	0.00054142	0.00032322	0.000433017	0.00037483	0.00057801
	558	0.00141643	0.0014438	0.000931127	0.000859183	0.00061708	0.00048946	0.000331753	0.000428017	0.000356247	0.000540273
	558.5	0.00141747	0.00140897	0.00094635	0.0008334	0.000677967	0.00049912	0.00039354	0.000427593	0.00035062	0.000497443
	559	0.00139893	0.00136133	0.000955337	0.00081561	0.00071237	0.00051757	0.00043474	0.000449237	0.000362757	0.00044365
	559.5	0.00138083	0.00131533	0.000971407	0.000797287	0.000700187	0.00054358	0.000452047	0.000483387	0.00034891	0.00040693
	560	0.00135323	0.0012953	0.00094763	0.000786217	0.000659483	0.0005859	0.000431817	0.000511063	0.000305273	0.00040796
	560.5	0.00129607	0.00127933	0.000929633	0.00077592	0.000607643	0.00053749	0.00038657	0.000497817	0.000278803	0.000423033
	561	0.00122367	0.00125107	0.000915527	0.00075633	0.000553833	0.00049398	0.00033995	0.000436607	0.000261537	0.00044928
	561.5	0.00116742	0.00120823	0.00091541	0.000719307	0.000514403	0.00046129	0.00028827	0.000373997	0.000249923	0.00045922
	562	0.00115624	0.00119853	0.000922773	0.000699073	0.000522063	0.00046402	0.000254477	0.000329627	0.000235293	0.00047031
	562.5	0.00116951	0.0012084	0.000908073	0.000688203	0.00050294	0.00049219	0.000245497	0.000331917	0.000241497	0.000458023
	563	0.0011929	0.00122737	0.000876597	0.000678917	0.000471777	0.00047308	0.000257097	0.000346093	0.000280197	0.000405147
	563.5	0.00119563	0.001202	0.000845107	0.000681737	0.000424647	0.00043137	0.000277757	0.000355587	0.000322173	0.000364043
	564	0.00119871	0.00117897	0.000831537	0.000665263	0.000443537	0.00036941	0.000269333	0.00034242	0.00034328	0.000346457
	564.5	0.00118264	0.00115467	0.000828627	0.000649753	0.000475657	0.00032656	0.00024864	0.000322943	0.00029303	0.00037855
	565	0.00116342	0.00113223	0.000791163	0.000621547	0.000493517	0.00029877	0.00022571	0.000310303	0.000234483	0.00042727
	565.5	0.00115798	0.0011269	0.000750223	0.000606583	0.000530837	0.00029873	0.000201187	0.000333743	0.000168657	0.000444737
	566	0.00113519	0.00110193	0.000731017	0.000607797	0.000531063	0.00031491	0.00020449	0.000337123	0.000149017	0.000459287
	566.5	0.00113152	0.0010975	0.00072864	0.000600693	0.000519097	0.00035177	0.00022816	0.000332763	0.000137813	0.00044354
	567	0.0011208	0.00109763	0.000723013	0.000594427	0.0004765	0.00041792	0.00025648	0.00030128	0.000150834	0.000420973
	567.5	0.00109365	0.00108273	0.00068627	0.000588423	0.000415837	0.00043492	0.000271783	0.000279637	0.00019234	0.000393033
	568	0.00104752	0.00106277	0.000660557	0.000592887	0.000352397	0.00038644	0.000275803	0.00026568	0.000227333	0.00035338
	568.5	0.000999113	0.00102008	0.000671563	0.000603697	0.00031918	0.00032176	0.000253107	0.00027784	0.00024907	0.000341877
	569	0.00100995	0.00102108	0.00067983	0.000595377	0.00031038	0.00030465	0.000235317	0.00026809	0.000257977	0.000355273
	569.5	0.00103283	0.00103042	0.000681863	0.000583617	0.00034342	0.00036716	0.00022878	0.000245727	0.000257067	0.000384143
	570	0.00106554	0.00105418	0.000641857	0.000584963	0.00031659	0.00044964	0.00023549	0.00021326	0.00024502	0.000384213
	570.5	0.00107923	0.00106663	0.000610063	0.0005977	0.000280687	0.00048512	0.000240357	0.000225613	0.00018762	0.00035
	571	0.00109077	0.00107936	0.00057506	0.000611093	0.000253613	0.00047863	0.000219537	0.00024823	0.000103228	0.000287887
	571.5	0.00104901	0.0010389	0.00055861	0.000602163	0.000239637	0.00042042	0.000205503	0.000234557	9.43697e-05	0.000236727
	572	0.00098517	0.00096981	0.000551733	0.000563863	0.000220327	0.00036416	0.00019946	0.000183253	0.000117667	0.000215543
	572.5	0.000906267	0.000879627	0.00054264	0.00052848	0.00020845	0.0003265	0.000196353	0.000138267	0.00011626	0.00019053
	573	0.000859	0.000855603	0.00052947	0.000492903	0.000202917	0.00030155	0.000197503	0.000179717	0.000102726	0.000203037
	573.5	0.00081502	0.000847627	0.000521917	0.00047883	0.000234883	0.00032803	0.000179927	0.00024656	8.46953e-05	0.000230133
	574	0.000805603	0.000843353	0.000542163	0.00046614	0.000251937	0.00035124	0.000156207	0.000299767	0.000110212	0.000298637
	574.5	0.00082869	0.00085669	0.000589253	0.000457117	0.000269683	0.00037052	0.000135755	0.000270817	0.000120427	0.000322497
	575	0.000863153	0.000865653	0.000617857	0.000439157	0.00024799	0.00033945	0.000106146	0.000199993	0.000117665	0.000291407
	575.5	0.00086605	0.000873417	0.000617947	0.000434097	0.000243973	0.00025762	0.000116631	0.000163357	0.00010989	0.000224833
	576	0.000838423	0.000842793	0.000586123	0.000436517	0.000277943	0.00022372	0.000113068	0.000140662	0.000102841	0.00018001
	576.5	0.000810453	0.000811853	0.00054646	0.000444257	0.000319577	0.00023235	0.000121447	0.000157377	8.20617e-05	0.000195587
	577	0.000798673	0.00081688	0.000522283	0.000445683	0.00031486	0.00030928	8.66677e-05	0.000163341	5.65017e-05	0.00021529
	577.5	0.000800613	0.0008274	0.00051804	0.000439317	0.000266493	0.00038195	5.05967e-05	0.000182697	6.0413e-05	0.000246983
	578	0.00080302	0.00085355	0.000564073	0.000430807	0.000199697	0.00043677	4.15027e-05	0.000198107	7.23993e-05	0.00023318
	578.5	0.000801817	0.00083982	0.000587253	0.00043205	0.000203237	0.00044212	7.42737e-05	0.00020952	9.51523e-05	0.000213407
	579	0.000781533	0.000808187	0.000573283	0.00044926	0.000230447	0.0003552	0.000136514	0.000208237	8.64163e-05	0.000193417
	579.5	0.000732823	0.000738907	0.0004928	0.000469853	0.000247713	0.00023552	0.00014625	0.0002102	4.83532e-05	0.000202453
	580	0.00071734	0.000739283	0.00043089	0.000468217	0.000266657	0.00015414	0.000112826	0.000193637	1.54573e-05	0.00019975
	580.5	0.00071155	0.000769523	0.000415367	0.000462397	0.00025838	0.00012657	0.0001008	0.000177033	7.28767e-06	0.000211953
	581	0.0007424	0.00082063	0.000443433	0.000441353	0.00024108	0.00013839	0.00013352	0.000146857	1.86667e-05	0.000200543
	581.5	0.000736927	0.000807583	0.000488597	0.00042286	0.000230307	0.00018146	0.00017522	0.00015621	6.11373e-05	0.000192607
	582	0.000712587	0.000758897	0.000508563	0.000383717	0.00021085	0.00025517	0.00019168	0.000195213	8.13443e-05	0.00018713
	582.5	0.00067861	0.000711507	0.00048826	0.000343623	0.000221977	0.00031713	0.000187187	0.00025276	8.83227e-05	0.000167237
	583	0.0006826	0.00069287	0.00043381	0.000338583	0.00023089	0.00032088	0.000158253	0.00025557	6.66467e-05	0.000181297
	583.5	0.000688683	0.00066801	0.00038259	0.000351153	0.000243417	0.00028185	0.00016651	0.00024604	5.73263e-05	0.000212887
	584	0.000713677	0.000688317	0.000358243	0.00038065	0.000273307	0.00025541	0.000156445	0.000223077	5.052e-05	0.00024708
	584.5	0.000741013	0.000726837	0.000354727	0.000398283	0.00025509	0.00023795	0.00020531	0.000189227	5.51367e-05	0.0002345
	585	0.00077197	0.000808737	0.00034111	0.000405213	0.000238887	0.00017967	0.000190417	0.000135506	9.956e-05	0.000198177
	585.5	0.000772223	0.000825997	0.00035068	0.000392987	0.000153023	0.00015944	0.0001862	0.000115969	0.000114653	0.00017614
	586	0.00074428	0.000786637	0.00036516	0.00037198	8.4403e-05	0.00015782	0.000150838	9.81377e-05	9.89263e-05	0.000176007
	586.5	0.000726343	0.00074838	0.000383377	0.000365913	3.34433e-05	0.00017839	0.000145017	0.000104131	2.5358e-05	0.00021056
	587	0.000716163	0.00073044	0.000384553	0.000370237	4.8391e-05	0.00013398	0.000144113	0.000108139	0	0.000195127
	587.5	0.000703927	0.000733667	0.000356937	0.000367943	3.93653e-05	8.6836e-05	0.000122058	0.00012588	0	0.000173197
	588	0.00068925	0.000727467	0.00034308	0.000344083	7.2861e-05	9.5262e-05	8.451e-05	0.000149845	7.86767e-06	0.000147662
	588.5	0.000680193	0.000714327	0.00030251	0.00032195	7.37147e-05	0.00012482	3.38053e-05	0.000116188	4.2425e-05	9.86367e-05
	589	0.000693967	0.000724667	0.00030249	0.00030721	9.44027e-05	0.000134	6.27067e-06	7.69463e-05	8.5212e-05	5.005e-05
	589.5	0.000666853	0.00069487	0.000319373	0.000307103	0.000110471	0.00016038	3.967e-06	9.41363e-05	7.24037e-05	2.93027e-05
	590	0.000634283	0.000652683	0.000344097	0.000336313	8.64163e-05	0.00019898	1.86047e-05	0.000122918	5.6859e-05	2.71537e-05
	590.5	0.000600407	0.00062	0.00033595	0.000359153	8.4422e-05	0.0002264	5.8041e-05	0.000134524	1.36744e-05	5.49527e-05
	591	0.00059833	0.000621863	0.00032155	0.000362627	0.00012224	0.00021518	0.000105228	0.000140809	1.60643e-05	5.27333e-05
	591.5	0.000618687	0.000657013	0.000296097	0.000343213	0.000168707	0.00020877	0.000121313	0.000114747	7.448e-07	0.000107403
	592	0.00062036	0.000666573	0.000284473	0.000329323	0.00019106	0.00028346	0.00010715	0.000136722	2.60353e-06	0.00016001
	592.5	0.00059567	0.000657207	0.000280037	0.000359287	0.000183153	0.00037048	9.92233e-05	0.00011421	1.3433e-05	0.00024047
	593	0.000582433	0.00065621	0.00027422	0.000381187	0.000142323	0.00042914	9.42393e-05	0.000122763	3.0689e-05	0.000256047
	593.5	0.000610067	0.00068516	0.000255443	0.000375333	0.000108661	0.00038954	8.1474e-05	0.00015065	3.76404e-05	0.000227373
	594	0.000623447	0.000690717	0.000220567	0.00034269	7.85727e-05	0.00031675	6.57023e-05	0.000197307	7.9967e-05	0.000196683
	594.5	0.00059718	0.000647707	0.000200737	0.000302037	7.5361e-05	0.0002729	2.58539e-05	0.000233287	0.000150351	0.000171627
	595	0.000532463	0.000583913	0.000231543	0.000317957	8.2946e-05	0.00029996	4.553e-05	0.000247537	0.000123437	0.000200943
	595.5	0.000500087	0.000558507	0.000273957	0.000330057	9.70937e-05	0.00034705	7.65047e-05	0.000261813	6.38097e-05	0.00022197
	596	0.000499557	0.000572307	0.00027375	0.000322053	0.000117463	0.00039543	0.000111041	0.000233747	3.05893e-05	0.00021513
	596.5	0.000507577	0.000591043	0.000266557	0.000296287	0.000120487	0.00034337	9.69497e-05	0.000199837	4.5293e-05	0.000206653
	597	0.000522967	0.000587537	0.00026231	0.00027767	0.000111779	0.00028834	8.24643e-05	0.000141464	6.357e-05	0.00021026
	597.5	0.00052167	0.000539013	0.000316177	0.000278593	0.000124249	0.00021615	8.4142e-05	0.00015233	3.46997e-05	0.000172017
	598	0.000521043	0.000500113	0.000356047	0.000299023	0.000109227	0.00016083	0.000131532	0.000173882	5.476e-06	0.000161647
	598.5	0.000501587	0.000502343	0.00035014	0.000338843	8.0643e-05	0.00017892	0.000167153	0.000205357	6.27e-06	0.000131503
	599	0.000493677	0.00054287	0.00028115	0.000374053	6.1853e-05	0.00015644	0.000168157	0.000182637	2.20913e-05	0.000135357
	599.5	0.00051088	0.000588903	0.000222303	0.000380377	6.13602e-05	0.00017875	0.000170128	0.000141278	4.27358e-05	0.000115096
	600	0.000503323	0.000576547	0.000218543	0.000357487	8.07657e-05	0.00019219	0.000148891	0.000129231	4.10484e-05	0.000126266
	600.5	0.00048765	0.00055457	0.00023113	0.000333143	8.26667e-05	0.00021269	0.000141776	0.000129576	3.18246e-05	0.000129191
	601	0.000453987	0.0005486	0.00021739	0.000323573	0.000104826	0.00025503	7.55713e-05	0.00012853	4.04937e-05	0.000169473
	601.5	0.000458347	0.00056568	0.0001557	0.00029313	0.000111422	0.00027419	3.2858e-05	0.000114561	6.32787e-05	0.000180267
	602	0.00047424	0.000570537	0.000143505	0.000280753	8.21827e-05	0.00022227	4.64633e-05	9.5575e-05	5.7475e-05	0.000187877
	602.5	0.000489263	0.000579877	0.000157238	0.000267613	2.14988e-05	0.00018592	6.40201e-05	9.81263e-05	3.58973e-05	0.000176567
	603	0.0004781	0.000592217	0.000231093	0.000271313	1.6638e-07	0.0001317	7.23626e-05	7.49007e-05	6.49201e-06	0.000127755
	603.5	0.000508487	0.000621523	0.00028219	0.00026531	4.43167e-06	0.00013706	5.582e-05	7.45373e-05	2.48177e-06	9.28223e-05
	604	0.000505147	0.000585867	0.000314363	0.000252053	7.32549e-05	0.00012608	3.9182e-05	8.75993e-05	1.91607e-06	7.4396e-05
	604.5	0.00051854	0.0005388	0.000269082	0.000236603	0.000153315	0.00014436	6.55837e-05	0.00015519	0	0.000114338
	605	0.000476463	0.000495297	0.00017914	0.000245863	0.000143233	0.00022904	8.03473e-05	0.000216573	2.15801e-05	0.000128481
	605.5	0.00046201	0.000516773	0.0001235	0.000261133	8.6087e-05	0.00028244	0.000115385	0.000233017	5.11127e-05	0.000135842
	606	0.000460837	0.000569857	0.000116947	0.000268853	6.6076e-05	0.00026144	0.000136238	0.000197437	5.14927e-05	0.000124467
	606.5	0.000475267	0.0006082	0.00015103	0.00026292	8.12773e-05	0.00023736	0.000123636	0.000131497	3.77833e-05	0.000140897
	607	0.00048722	0.000620473	0.000196083	0.00024672	0.000103415	0.00025888	7.92157e-05	8.89147e-05	3.03787e-05	0.000155017
	607.5	0.000477197	0.000611007	0.000191337	0.00023193	0.000113731	0.00031101	2.75068e-05	7.67523e-05	3.11147e-05	0.000181177
	608	0.000448513	0.000566143	0.000166297	0.00022196	0.000127593	0.00033519	3.03283e-05	5.37553e-05	6.2695e-05	0.00018391
	608.5	0.000430377	0.00053899	0.000121502	0.000218697	0.000143076	0.00031606	5.96783e-05	4.88837e-05	6.61037e-05	0.000179727
	609	0.000423147	0.000535953	0.000103444	0.00020696	0.000139523	0.00029626	8.7073e-05	7.1925e-05	4.01837e-05	0.000175063
	609.5	0.000481253	0.000581507	8.7697e-05	0.000187767	0.000132333	0.00030384	6.7122e-05	0.000137771	2.11327e-05	0.000165975
	610	0.000491971	0.000613353	8.45767e-05	0.000188107	0.00011573	0.00028609	2.35e-05	0.000198183	4.7226e-05	0.000188263
	610.5	0.000471502	0.000601407	7.6667e-05	0.000195637	0.000108346	0.00025064	8.21437e-06	0.00021764	6.92433e-05	0.000193893
	611	0.000448921	0.000609983	7.99573e-05	0.000220493	0.000110423	0.00015913	1.51122e-05	0.000180007	7.08729e-05	0.00016437
	611.5	0.000449361	0.0006284	8.52023e-05	0.000232273	6.37364e-05	0.00012274	5.14408e-05	0.000161573	0.000102764	0.000117706
	612	0.000463401	0.00063415	0.000109419	0.000251337	3.58007e-05	0.0001275	0.000103326	0.000117553	9.67357e-05	6.8629e-05
	612.5	0.000427168	0.000580813	0.000125546	0.000261683	2.49237e-05	0.00019707	0.000124327	9.4537e-05	6.07787e-05	7.77077e-05
	613	0.000371812	0.000503127	0.000129254	0.000259367	3.0499e-05	0.00027118	0.00015074	8.47483e-05	2.8572e-06	8.9324e-05
	613.5	0.000362664	0.000477573	0.000113218	0.000240787	2.15863e-05	0.00033283	0.000156595	0.00011702	0	8.88453e-05
	614	0.000377586	0.000466163	9.21127e-05	0.000229037	4.8212e-05	0.00039388	0.000128179	0.000177123	0	8.27703e-05
	614.5	0.000415107	0.000465553	0.000110264	0.000221003	0.000133271	0.00041723	8.451e-05	0.00016988	5.355e-06	6.72247e-05
	615	0.000462123	0.00048417	0.000124293	0.00023831	0.000189403	0.00037523	2.65903e-05	0.000136137	1.55737e-05	6.6716e-05
	615.5	0.00047339	0.000514657	0.000160378	0.00026305	0.0001303	0.00025314	2.71773e-05	9.71577e-05	2.93357e-05	7.44373e-05
	616	0.000485903	0.00056704	0.000202783	0.000261813	8.70827e-05	0.00014056	9.25237e-05	0.000100808	9.81687e-05	0.000111021
	616.5	0.000464095	0.000598403	0.000236657	0.00024763	4.12007e-05	0.00011312	0.000116425	9.15227e-05	0.000150456	0.000125577
	617	0.000435931	0.000582103	0.00025563	0.000252283	5.3885e-05	7.2517e-05	6.07649e-05	9.4491e-05	0.000134148	0.00015268
	617.5	0.000379607	0.000518337	0.00022821	0.000271623	3.5059e-05	0.00010107	5.32353e-05	0.00010211	0.000103983	0.000138823
	618	0.000374653	0.000500707	0.000195872	0.000291363	8.98367e-07	0.00016951	5.71353e-05	0.000163418	6.11433e-05	0.000127647
	618.5	0.000390957	0.000541437	0.000172649	0.000275127	0	0.00032559	7.68573e-05	0.000185007	2.8813e-05	0.000133881
	619	0.000414197	0.000598237	0.000142196	0.000242123	2.7084e-06	0.00041775	7.01717e-05	0.000170163	0	0.00019545
	619.5	0.000345773	0.000495973	0.000106407	0.000231813	3.96497e-05	0.00039569	7.4938e-05	0.000109906	0	0.000282997
	620	0.000284057	0.000407907	9.7418e-05	0.000240797	6.00137e-05	0.00036441	9.43967e-05	7.1284e-05	1.2613e-06	0.00031603
	620.5	0.000252623	0.000366093	0.000100943	0.000255927	3.4053e-05	0.00034281	0.000114042	6.66653e-05	2.58543e-05	0.000293277
	621	0.000277293	0.00042548	0.00010264	0.000270323	5.5925e-05	0.00029897	0.000139704	7.63373e-05	4.0986e-05	0.00021997
	621.5	0.000330963	0.00050786	9.08747e-05	0.000274097	0.000116868	0.00027566	0.000113251	5.13677e-05	5.82643e-05	0.000184107
	622	0.000356615	0.000537117	6.17014e-05	0.000263447	0.000209173	0.00019091	6.0864e-05	2.68033e-06	9.67243e-05	0.000151406
	622.5	0.000378377	0.000579147	6.21567e-05	0.000241653	0.0002867	0.00017579	2.13743e-05	0	8.8066e-05	0.000159029
	623	0.000389033	0.000597047	6.19867e-05	0.000215567	0.00027086	0.00017856	1.9275e-06	1.6679e-06	9.80717e-05	0.000215893
	623.5	0.00039242	0.0005872	7.27591e-05	0.000222683	0.000247777	0.0002404	3.1031e-05	3.25414e-05	0.000122558	0.00027325
	624	0.000419683	0.000599437	6.182e-05	0.000262057	0.00020961	0.00029825	0.000103033	5.09677e-05	0.000134442	0.000283107
	624.5	0.000434217	0.000595407	4.37633e-05	0.000277493	0.000227283	0.00031171	0.000148624	6.7633e-05	7.72117e-05	0.000309093
	625	0.00046682	0.000632577	4.10767e-05	0.000255833	0.000242083	0.00031223	0.00016956	7.0839e-05	3.02915e-05	0.00032812
	625.5	0.000445403	0.00060176	5.027e-05	0.000206683	0.000242233	0.00029314	0.000134867	0.000103187	1.76533e-05	0.000358713
	626	0.000416793	0.000574277	6.46993e-05	0.000177597	0.000245553	0.00029869	9.4e-05	0.00013431	4.09233e-05	0.000281283
	626.5	0.000401621	0.000553717	8.03068e-05	0.000206613	0.000190843	0.00030133	6.4937e-05	0.000128187	3.65706e-05	0.000153646
	627	0.000402262	0.000554657	8.12917e-05	0.00024835	0.000129781	0.00029025	8.88697e-05	0.000119481	8.01373e-05	7.4486e-05
	627.5	0.000372333	0.000519853	7.75209e-05	0.000332143	0.000121533	0.0002087	0.000106482	6.92027e-05	0.000116978	8.29637e-05
	628	0.000372607	0.000533933	6.99953e-05	0.000370153	0.0001638	0.00021445	7.17133e-05	6.44213e-05	0.000138283	0.000147383
	628.5	0.00038561	0.000581517	6.97043e-05	0.000380073	0.000217477	0.00024343	2.81887e-05	8.99673e-05	0.000138279	0.000163833
	629	0.000396219	0.000595287	0.000120698	0.000334883	0.000181113	0.00036655	3.86853e-05	0.000203933	0.000123919	0.000137513
	629.5	0.000433223	0.000585737	0.00016758	0.00034095	0.000112371	0.00042769	0.000109875	0.000283613	0.000126091	0.000102586
	630	0.000466627	0.000581057	0.00020547	0.000360433	9.47999e-05	0.00044897	0.000173043	0.000270257	8.92967e-05	9.80947e-05
	630.5	0.00048064	0.000578103	0.000207677	0.00037304	0.000127906	0.00045639	0.00024699	0.00020583	4.87931e-05	0.000134739
	631	0.000457247	0.000572573	0.000245517	0.000361237	0.000221393	0.00043399	0.000216153	0.000176737	3.2075e-05	0.00018917
	631.5	0.000406233	0.000542293	0.000236957	0.00037415	0.000205909	0.00040064	0.000184297	0.000201233	4.13583e-05	0.00030417
	632	0.00035869	0.000539273	0.000219093	0.000424457	0.00022723	0.00035667	0.000152716	0.00023929	0.000108523	0.00039873
	632.5	0.00033998	0.000520883	0.0001693	0.000459547	0.000218882	0.00039001	0.000174327	0.000239423	0.00015302	0.000467157
	633	0.000376305	0.000566187	0.000143981	0.000488983	0.00026167	0.00043427	0.000233753	0.000260723	0.000143213	0.000445513
	633.5	0.000445434	0.00063967	0.000145055	0.000472763	0.000240037	0.00051559	0.000264227	0.000288097	0.000106143	0.000433753
	634	0.000489067	0.000722313	0.000166473	0.00044634	0.000208547	0.00062221	0.000307837	0.00030564	0.000110109	0.000364137
	634.5	0.000460706	0.00070869	0.000200767	0.00040235	0.000239087	0.00074113	0.000340467	0.00029353	0.000156165	0.000339843
	635	0.000443321	0.000720717	0.000239903	0.000416023	0.000301033	0.00079868	0.00036137	0.00025654	0.00022412	0.0003089
	635.5	0.000436559	0.000747713	0.000289357	0.00048533	0.00040643	0.00075289	0.000324483	0.00026581	0.000291027	0.000354137
	636	0.00044007	0.000777363	0.000288823	0.0005351	0.000461263	0.0006683	0.00032294	0.00031964	0.000302453	0.00043277
	636.5	0.000481584	0.0008066	0.000246203	0.00054112	0.000514577	0.00064055	0.000328237	0.000348	0.00026514	0.000548207
	637	0.000525957	0.000842977	0.000185483	0.00050638	0.00049686	0.00060877	0.00035215	0.000394727	0.000233613	0.000583143
	637.5	0.000541757	0.000856023	0.000164826	0.00051085	0.000502383	0.00057856	0.00037466	0.00041415	0.00022878	0.000574163
	638	0.000516713	0.00084642	0.0001824	0.00051032	0.000557193	0.00060098	0.00041669	0.00044852	0.000241727	0.000534617
	638.5	0.0004527	0.000754803	0.000219863	0.000499167	0.000604633	0.00068575	0.00043341	0.000453933	0.000332037	0.000588307
	639	0.00041363	0.000725073	0.000228687	0.000511427	0.000681957	0.0008146	0.00042443	0.000454677	0.000445227	0.000637613
	639.5	0.000391007	0.000753623	0.000266267	0.00058073	0.000650953	0.00091028	0.000421733	0.000479503	0.000558757	0.00065741
	640	0.000425857	0.000840737	0.000287193	0.000651203	0.000624917	0.00098732	0.000461447	0.00047345	0.000636293	0.000661753
	640.5	0.000464943	0.00090134	0.000325587	0.00068056	0.000571513	0.0010579	0.000522107	0.00051509	0.000653277	0.0006776
	641	0.00046135	0.000888147	0.000338513	0.000663863	0.000637897	0.0011276	0.000548517	0.000565407	0.000692433	0.000679593
	641.5	0.000473833	0.000909077	0.00033596	0.00070823	0.00071711	0.0011366	0.00057421	0.000642523	0.000694293	0.00069601
	642	0.000470657	0.00090348	0.000352623	0.00074545	0.00082194	0.0010927	0.00057847	0.000715557	0.000683057	0.00072717
	642.5	0.000525667	0.000955823	0.0003833	0.000779457	0.000884247	0.0010038	0.000569717	0.000790597	0.000641663	0.000738453
	643	0.00060564	0.0010199	0.000478767	0.000794433	0.00101315	0.00091538	0.000619663	0.00085607	0.00061803	0.000742737
	643.5	0.000708737	0.00118123	0.000549277	0.000884027	0.00109261	0.00090897	0.000706497	0.00091364	0.00071311	0.000734403
	644	0.000745337	0.00129637	0.000609393	0.00101793	0.00113499	0.0010153	0.000794657	0.000986643	0.000805993	0.00083028
	644.5	0.000793587	0.00136353	0.000622423	0.00112225	0.00119477	0.0011216	0.000917083	0.00107274	0.000900503	0.000964673
	645	0.00085275	0.00134043	0.000679887	0.001212	0.00136063	0.0011952	0.00101056	0.00110757	0.000958143	0.00106477
	645.5	0.000937983	0.0013706	0.000750043	0.0012744	0.0014997	0.0012827	0.00110887	0.0011135	0.00104422	0.00112447
	646	0.000962967	0.00143263	0.000832423	0.00137837	0.00152527	0.0014451	0.001177	0.00114913	0.00113623	0.00109153
	646.5	0.000990063	0.00154917	0.000955313	0.0014544	0.00148803	0.0016416	0.00122347	0.00126353	0.0011384	0.0011212
	647	0.000936487	0.00157383	0.0010468	0.00149803	0.00154	0.0018623	0.0013074	0.0013445	0.00117507	0.0011808
	647.5	0.000854967	0.00151227	0.0011437	0.00156133	0.00162657	0.0020157	0.00133477	0.0014138	0.00125987	0.0012708
	648	0.000795243	0.00146863	0.0011874	0.0016587	0.0017525	0.002171	0.00140293	0.00153553	0.0014197	0.00138157
	648.5	0.00088723	0.0015771	0.0012208	0.00184347	0.00185063	0.0021996	0.0015493	0.00165597	0.00159037	0.001437
	649	0.00100322	0.001762	0.0012843	0.00196793	0.0019827	0.0022188	0.001686	0.00171497	0.00173653	0.00150933
	649.5	0.00114252	0.0020169	0.00133387	0.00204303	0.00214273	0.0022483	0.00172553	0.00168757	0.00187433	0.00160877
	650	0.00120764	0.0021803	0.00141547	0.00208243	0.00225477	0.002342	0.00170893	0.00172913	0.0019577	0.00176363
	650.5	0.00130229	0.00235283	0.00152457	0.00219613	0.002362	0.0025332	0.0017883	0.00187783	0.00205137	0.00191237
	651	0.00138608	0.00243887	0.00163077	0.0023208	0.00245487	0.0026494	0.00201627	0.0020431	0.0020994	0.00200433
	651.5	0.00146221	0.00254813	0.00173023	0.002425	0.00263073	0.002814	0.00223623	0.0021673	0.00218623	0.0020598
	652	0.00150132	0.00259777	0.00180377	0.00255137	0.00290063	0.0028985	0.00242037	0.0022894	0.00229603	0.00212863
	652.5	0.00148918	0.0025872	0.00186833	0.0027083	0.0031338	0.003011	0.00253997	0.00241313	0.0024984	0.0021906
	653	0.00149277	0.0025898	0.00192003	0.00285943	0.003304	0.0031295	0.0026585	0.0025423	0.0026781	0.0022943
	653.5	0.0015353	0.0026272	0.00197217	0.00293983	0.0033794	0.0032999	0.0027812	0.00266747	0.00282403	0.00241763
	654	0.00160727	0.00276023	0.00203387	0.00305037	0.00350367	0.0035382	0.00293867	0.0028156	0.0029133	0.00258063
	654.5	0.00166853	0.00288693	0.00215363	0.0031702	0.0037305	0.00377	0.0031203	0.00300323	0.00297523	0.00281117
	655	0.00169853	0.00298647	0.0022939	0.00335647	0.0038765	0.0039867	0.00330933	0.00318627	0.00306477	0.0030354
	655.5	0.00177617	0.0031035	0.0024758	0.00355493	0.00396233	0.0041362	0.0034968	0.0033522	0.00317093	0.00318677
	656	0.0018995	0.00330083	0.00263837	0.00375033	0.00402563	0.0041703	0.00363907	0.00349997	0.00339253	0.0032767
	656.5	0.00207173	0.00357133	0.00275847	0.00396383	0.00428933	0.0041843	0.00376733	0.0036626	0.00358773	0.00334487
	657	0.00222037	0.0037931	0.00286013	0.00415023	0.0045528	0.0044389	0.00391743	0.00387643	0.0037709	0.0035256
	657.5	0.0023113	0.00393923	0.0029836	0.0043357	0.00475973	0.0047637	0.00412477	0.0040974	0.00394633	0.00368017
	658	0.00243137	0.00409493	0.00316317	0.00451813	0.00496633	0.0051203	0.0043635	0.0043294	0.0041809	0.00381943
	658.5	0.00256417	0.00426233	0.0033175	0.00475833	0.00525737	0.0052874	0.0045935	0.00450957	0.00444387	0.00396233
	659	0.0026931	0.00443867	0.0034917	0.0050479	0.0055726	0.005526	0.004808	0.0046465	0.00468213	0.004147
	659.5	0.00281367	0.00459013	0.00368073	0.00530157	0.0058479	0.0058653	0.004971	0.00486127	0.0048837	0.0043242
	660	0.00298917	0.00482503	0.0039599	0.00557093	0.0061412	0.0062991	0.00514623	0.00510563	0.00514557	0.00450703
	660.5	0.00317667	0.00510317	0.0042113	0.0058774	0.00649597	0.0066831	0.00543173	0.00541217	0.0054184	0.0046502
	661	0.0034111	0.00549977	0.00445037	0.0062279	0.00687943	0.006961	0.0058317	0.0056758	0.00568317	0.00486533
	661.5	0.00355213	0.00585997	0.00474013	0.0065905	0.0072558	0.0073188	0.00619433	0.0059646	0.0059838	0.00515787
	662	0.0037373	0.00622123	0.00503507	0.00705687	0.0076911	0.0077107	0.00656833	0.00628177	0.00634373	0.00553683
	662.5	0.0038972	0.00654063	0.00530907	0.0076099	0.00817663	0.008109	0.00692723	0.00668873	0.00678127	0.0059806
	663	0.0041419	0.00692707	0.0055863	0.00815823	0.00876483	0.0084399	0.00731187	0.0071495	0.0072603	0.00641223
	663.5	0.0044126	0.00736647	0.00593647	0.00863877	0.00938803	0.0088742	0.00770793	0.00758993	0.00775243	0.00676337
	664	0.00469457	0.00784443	0.00642527	0.00906357	0.0101088	0.0094375	0.0082033	0.0080347	0.00824027	0.00709443
	664.5	0.00495743	0.00834193	0.00684493	0.00954783	0.010762	0.0099916	0.00881513	0.00846233	0.00866687	0.0073922
	665	0.00523933	0.0088542	0.00728307	0.0100401	0.011381	0.010482	0.00944167	0.0089656	0.00902177	0.0077898
	665.5	0.00565283	0.0094591	0.0076588	0.010592	0.011946	0.010989	0.010044	0.00940927	0.00939143	0.00818563
	666	0.0061179	0.0101062	0.00813153	0.0111445	0.0125763	0.011463	0.0106593	0.0098919	0.0098346	0.00863563
	666.5	0.0065323	0.0106607	0.00865673	0.0118071	0.0132637	0.01201	0.0112783	0.010409	0.0103773	0.00916037
	667	0.00677253	0.011044	0.00917943	0.0125287	0.014001	0.012649	0.0119277	0.0109084	0.0109837	0.009647
	667.5	0.0069916	0.0114847	0.00970567	0.013319	0.014853	0.013513	0.0125643	0.0114403	0.011717	0.010156
	668	0.00736333	0.0121103	0.0102146	0.0140653	0.015661	0.014404	0.0132127	0.0119777	0.0124473	0.010613
	668.5	0.00780097	0.0128403	0.0107929	0.014792	0.0165393	0.01524	0.013931	0.0126627	0.013171	0.011191
	669	0.00830963	0.0136227	0.0114025	0.0155473	0.0173717	0.015895	0.0146877	0.0134003	0.0137707	0.011825
	669.5	0.008744	0.0142787	0.0120022	0.0163893	0.0182767	0.016446	0.0153973	0.0141673	0.0143907	0.0124617
	670	0.00923607	0.0149713	0.0125915	0.0172703	0.0190747	0.017012	0.0160697	0.0149127	0.0150323	0.0130747
	670.5	0.00973043	0.0157067	0.0132217	0.0181513	0.0199303	0.017773	0.016848	0.015618	0.0156713	0.0136607
	671	0.010265	0.016643	0.0138617	0.0190143	0.020853	0.018605	0.0177447	0.0163573	0.0163633	0.0142293
	671.5	0.0107269	0.017533	0.0145393	0.019881	0.021921	0.019429	0.0186087	0.0171003	0.0170623	0.014833
	672	0.0111953	0.0183467	0.015187	0.0208603	0.0230917	0.020356	0.019397	0.0178473	0.0177833	0.015529
	672.5	0.0117673	0.019219	0.0158353	0.0218607	0.024241	0.02138	0.0201273	0.0186403	0.018571	0.01636
	673	0.0124537	0.0202303	0.0165367	0.0229097	0.0253673	0.022354	0.021007	0.0194173	0.0195747	0.0172133
	673.5	0.013084	0.0211957	0.0173207	0.0239	0.0264787	0.023251	0.0220823	0.020342	0.0207843	0.0179283
	674	0.0136067	0.022066	0.0181837	0.024937	0.02768	0.024344	0.0234063	0.0212983	0.021878	0.0187023
	674.5	0.0141487	0.022927	0.019081	0.0261087	0.0290497	0.025538	0.0247127	0.0223537	0.0228297	0.0195547
	675	0.0147513	0.0238533	0.0199863	0.0273643	0.030458	0.026797	0.0258463	0.0233603	0.0236837	0.0205137
	675.5	0.0154793	0.0248797	0.020991	0.0287737	0.0319	0.027992	0.0268633	0.0244357	0.0247377	0.021438
	676	0.0162057	0.0260167	0.0219263	0.0301753	0.03325	0.029266	0.0280333	0.0256233	0.025879	0.022349
	676.5	0.0169343	0.0273347	0.0228403	0.0315643	0.0347323	0.030571	0.0293973	0.026897	0.0271737	0.02329
	677	0.0176443	0.0287163	0.0237607	0.032916	0.0364703	0.031826	0.0308087	0.0280917	0.028443	0.024262
	677.5	0.0183977	0.0300967	0.0247967	0.0342977	0.03829	0.033186	0.0322233	0.0292303	0.029711	0.025355
	678	0.019208	0.031371	0.0259363	0.0356987	0.0398197	0.034541	0.0337037	0.030345	0.0307597	0.0264267
	678.5	0.0199603	0.0325507	0.0270193	0.0370133	0.041149	0.035891	0.0351393	0.031563	0.0318433	0.0274617
	679	0.020656	0.0336947	0.0280997	0.0382607	0.0424363	0.037115	0.036398	0.0328547	0.0330153	0.028595
	679.5	0.021307	0.0347787	0.0289907	0.039623	0.0439557	0.038536	0.0376347	0.034109	0.0344473	0.0298613
	680	0.022006	0.0358267	0.0298273	0.0409887	0.045473	0.039966	0.038921	0.035331	0.0358787	0.0310907
	680.5	0.022663	0.036828	0.0305657	0.0421927	0.0469193	0.041308	0.0401563	0.0363973	0.0369847	0.032028
	681	0.0232743	0.0378457	0.0313273	0.0431687	0.0482277	0.042353	0.0412693	0.037473	0.037944	0.0328237
	681.5	0.0237453	0.0387647	0.0320067	0.0440197	0.0492447	0.043406	0.0422063	0.0383717	0.0388817	0.033527
	682	0.024087	0.0393827	0.032436	0.044697	0.0500297	0.044378	0.0429847	0.0390997	0.039716	0.0342127
	682.5	0.0242753	0.0397663	0.0327577	0.0452633	0.0506537	0.045295	0.0435873	0.0397163	0.040398	0.0348673
	683	0.0243753	0.0399837	0.0330487	0.045734	0.0512307	0.046063	0.0441117	0.040427	0.0408927	0.035486
	683.5	0.0244297	0.0401393	0.033343	0.0461733	0.0518543	0.046546	0.0446247	0.0411497	0.0414273	0.0360647
	684	0.024374	0.040141	0.0335193	0.046438	0.052172	0.046873	0.044982	0.0416747	0.0418513	0.0365793
	684.5	0.0242133	0.0400423	0.0334653	0.0464893	0.052156	0.046997	0.045236	0.041991	0.0421633	0.0369577
	685	0.023946	0.0397537	0.0331717	0.0462283	0.0517797	0.047103	0.0452647	0.042128	0.0423107	0.037129
	685.5	0.023669	0.0394187	0.0328237	0.04586	0.051396	0.047246	0.04516	0.0422877	0.0424553	0.0372287
	686	0.0233153	0.0389127	0.0323777	0.045376	0.0510953	0.047529	0.0448383	0.0423467	0.042463	0.0373113
	686.5	0.0228557	0.0381747	0.031843	0.044842	0.050582	0.047716	0.0442817	0.0423283	0.0423663	0.0373897
	687	0.0222593	0.0372713	0.031168	0.0441293	0.0498017	0.047691	0.043639	0.0420783	0.0419783	0.0373093
	687.5	0.0216303	0.036346	0.0305117	0.043215	0.048735	0.047466	0.0429757	0.0416907	0.041519	0.0370557
	688	0.021	0.0354977	0.029855	0.0422327	0.047746	0.047088	0.0423687	0.0412923	0.0409853	0.036617
	688.5	0.0203783	0.0346353	0.0290407	0.0412073	0.046904	0.046455	0.0416503	0.0407857	0.0404517	0.0361467
	689	0.0197083	0.033635	0.0281077	0.040199	0.0461867	0.045844	0.0408467	0.0401637	0.0398397	0.0356647
	689.5	0.0190507	0.032536	0.0271867	0.039108	0.045383	0.045343	0.04	0.0395667	0.0392753	0.0352687
	690	0.0185083	0.031514	0.0263447	0.038094	0.0444303	0.044772	0.0392147	0.0391373	0.0386737	0.0348877
	690.5	0.017862	0.030578	0.0254833	0.0371407	0.043375	0.044159	0.0383157	0.038677	0.038033	0.034528
	691	0.0172253	0.0297537	0.024676	0.036204	0.0423573	0.043512	0.037481	0.038066	0.0373887	0.0341167
	691.5	0.0165137	0.028709	0.02394	0.0351933	0.0412673	0.042877	0.036734	0.0374607	0.0367123	0.0338003
	692	0.0158233	0.0276047	0.023267	0.0342453	0.040096	0.042133	0.0361307	0.0368953	0.036069	0.033541
	692.5	0.015141	0.026551	0.022541	0.033293	0.039033	0.041474	0.03547	0.0362737	0.0353937	0.0331433
	693	0.0145667	0.0257537	0.0218593	0.032361	0.0383287	0.04102	0.034765	0.0356347	0.0347717	0.0326627
	693.5	0.0140123	0.024967	0.0211673	0.0314233	0.037743	0.04056	0.0340563	0.0349867	0.0341843	0.0321753
	694	0.0133553	0.0239833	0.0205023	0.0305783	0.0370843	0.04012	0.033384	0.034416	0.0335737	0.0317997
	694.5	0.0127973	0.0230987	0.019853	0.0297637	0.0361177	0.039622	0.0327043	0.033883	0.033017	0.031414
	695	0.0124467	0.0223867	0.0192503	0.029028	0.0352033	0.039013	0.0321953	0.033493	0.0324267	0.0309887
	695.5	0.0121603	0.0217647	0.018689	0.0283173	0.0343607	0.038327	0.031812	0.0332107	0.0319957	0.0305757
	696	0.011683	0.0209303	0.018175	0.0276447	0.033789	0.037626	0.0314523	0.0328593	0.0315693	0.030176
	696.5	0.0112193	0.0202453	0.0176827	0.0269963	0.03314	0.037027	0.0309643	0.032423	0.031333	0.0297797
	697	0.0108199	0.0197317	0.0172947	0.0263573	0.0323577	0.036468	0.0303527	0.0320133	0.0308063	0.0293413
	697.5	0.0105715	0.0193293	0.016926	0.025611	0.0314917	0.03592	0.0296487	0.0316453	0.030261	0.0289057
	698	0.0103472	0.0188643	0.0165527	0.0249333	0.0308243	0.035473	0.0290947	0.0312373	0.0295927	0.028672
	698.5	0.0100866	0.0183617	0.016077	0.0243187	0.030342	0.035008	0.02868	0.0308013	0.0292117	0.0285247
	699	0.00975513	0.0178393	0.0155623	0.0238703	0.0299057	0.034712	0.0282793	0.0303773	0.028756	0.0284457
	699.5	0.0094749	0.0173983	0.0151813	0.023365	0.029305	0.0344	0.0278463	0.0300523	0.0284227	0.0283293
	700	0.0092132	0.0169917	0.0148377	0.0229357	0.0285857	0.034083	0.0274753	0.0297483	0.0281	0.0281227
	700.5	0.0089552	0.0165823	0.0145637	0.022501	0.027965	0.033578	0.0272683	0.0294783	0.0278983	0.0277353
	701	0.00869267	0.016083	0.0141807	0.0220967	0.027482	0.033027	0.0269997	0.029177	0.0275463	0.0272657
	701.5	0.0085127	0.0156763	0.0138147	0.0216313	0.027035	0.032519	0.0266163	0.0288543	0.0271427	0.0269517
	702	0.0083604	0.015337	0.01349	0.021163	0.0264977	0.032103	0.0261773	0.0285513	0.0268017	0.0268517
	702.5	0.00816933	0.0150783	0.0132327	0.0206963	0.0259957	0.031784	0.0257183	0.0282737	0.0265923	0.0266887
	703	0.0079601	0.0148313	0.01307	0.0202877	0.0255943	0.031505	0.0253943	0.0279043	0.0264703	0.026429
	703.5	0.00777967	0.0145573	0.0127943	0.0199243	0.0251073	0.031224	0.025034	0.027506	0.0262783	0.0261643
	704	0.00759803	0.01424	0.0126123	0.0195993	0.0246643	0.03088	0.0248067	0.027126	0.026045	0.0259927
	704.5	0.0074509	0.013959	0.0123027	0.0192697	0.0243013	0.030438	0.0245887	0.0268813	0.02581	0.025895
	705	0.00717473	0.0135827	0.0120673	0.0189337	0.0243463	0.030049	0.0242853	0.026676	0.0254947	0.0257177
	705.5	0.00697907	0.0132247	0.0116966	0.0185717	0.0241053	0.02961	0.0239293	0.0264863	0.0250077	0.025511
	706	0.00676977	0.0128883	0.0114253	0.0182947	0.023722	0.029151	0.0236033	0.026133	0.0247333	0.0253097
	706.5	0.0066331	0.0126907	0.0112636	0.0180153	0.0231393	0.028711	0.023373	0.0258147	0.024687	0.0251363
	707	0.0065661	0.0125257	0.0111773	0.0177773	0.0227657	0.02858	0.0231653	0.0256307	0.024677	0.025086
	707.5	0.0066249	0.0124947	0.0110204	0.0175223	0.0225167	0.028625	0.0230317	0.0255373	0.0244993	0.0249683
	708	0.00659443	0.012418	0.0107377	0.017327	0.0223417	0.028406	0.0229277	0.025331	0.0243417	0.0247927
	708.5	0.00642957	0.0123313	0.0105336	0.0171513	0.0221843	0.027867	0.022693	0.025121	0.024288	0.0244697
	709	0.00629913	0.0121883	0.0104269	0.0170593	0.0221503	0.027375	0.0225907	0.025157	0.024208	0.0243343
	709.5	0.00628463	0.0121873	0.0103949	0.016834	0.0221247	0.027241	0.0224667	0.0251237	0.024018	0.0243143
	710	0.00633483	0.012141	0.010356	0.0165957	0.021996	0.027284	0.022346	0.024963	0.0237473	0.0242773
	710.5	0.006318	0.0120703	0.0103692	0.0164417	0.021705	0.027251	0.022104	0.0246247	0.023484	0.024195
	711	0.00619473	0.0119053	0.0103579	0.0164153	0.0214283	0.027151	0.0219147	0.024385	0.023385	0.0240353
	711.5	0.00607127	0.0117267	0.0103096	0.016318	0.0211913	0.027023	0.021859	0.024218	0.0234183	0.0238977
	712	0.00609537	0.0116333	0.0101738	0.0161593	0.021063	0.027013	0.0218137	0.0241593	0.0235577	0.023803
	712.5	0.0061623	0.011588	0.0100945	0.0160523	0.0209067	0.026973	0.021864	0.0240517	0.0236007	0.0238257
	713	0.00608723	0.0113883	0.0100314	0.0159787	0.020892	0.02676	0.0218633	0.024012	0.0235933	0.02395
	713.5	0.00589907	0.0110863	0.0100669	0.015892	0.020764	0.026479	0.0217867	0.0239287	0.0235057	0.0239137
	714	0.00586333	0.0108897	0.0100151	0.0158207	0.0207073	0.026507	0.0216433	0.0239417	0.0234197	0.023758
	714.5	0.0058359	0.0108453	0.00990463	0.0157837	0.0205673	0.026755	0.021558	0.0239303	0.023313	0.0236433
	715	0.00580303	0.0108647	0.00972447	0.0157563	0.020357	0.026867	0.0215977	0.0239967	0.023209	0.0237413
	715.5	0.0056394	0.0108027	0.009744	0.0156917	0.02022	0.026714	0.0217717	0.0240147	0.0233043	0.02386
	716	0.00556537	0.0107377	0.0097673	0.0156147	0.0200873	0.026489	0.0218673	0.0239127	0.023365	0.0239733
	716.5	0.0055292	0.010677	0.00980183	0.0155713	0.020089	0.026354	0.0218603	0.0238147	0.0235283	0.0241273
	717	0.00556167	0.0107737	0.00974667	0.0155647	0.0201033	0.02625	0.021618	0.023824	0.0235813	0.0243267
	717.5	0.00553417	0.0108057	0.00971113	0.0155937	0.0202233	0.026208	0.021468	0.0240713	0.0236133	0.024233
	718	0.00557377	0.0108253	0.00966013	0.0156143	0.020345	0.026202	0.0214903	0.0242863	0.023502	0.024058
	718.5	0.00558373	0.010814	0.00970077	0.0156057	0.0205457	0.026276	0.0215887	0.0243733	0.0233923	0.0239243
	719	0.00559487	0.010872	0.00972867	0.0154967	0.0205733	0.026361	0.0216773	0.0242657	0.0232967	0.023973
	719.5	0.0055853	0.0108867	0.00959123	0.0153693	0.0204573	0.026394	0.0216273	0.024204	0.0231413	0.0237913
	720	0.00568757	0.01095	0.00935847	0.0153787	0.0202763	0.026383	0.0217137	0.0241837	0.023132	0.0236253
	720.5	0.00574933	0.0110563	0.0091424	0.015399	0.020177	0.026407	0.02173	0.024102	0.0232177	0.023549
	721	0.0057482	0.0111213	0.00914603	0.015484	0.0201447	0.026498	0.0217617	0.0240203	0.0233863	0.023795
	721.5	0.00563253	0.0111123	0.00926443	0.015517	0.019988	0.026603	0.0217333	0.023988	0.0233597	0.0240407
	722	0.00547707	0.01096	0.0095081	0.0155383	0.019801	0.026751	0.021707	0.0239113	0.023273	0.0238997
	722.5	0.00539943	0.0107613	0.00961773	0.015493	0.0197357	0.026818	0.0215727	0.023936	0.0233237	0.023803
	723	0.00540007	0.010714	0.0096148	0.0154657	0.0198937	0.026823	0.021458	0.0239547	0.0234223	0.0238343
	723.5	0.00556677	0.010775	0.00945777	0.0154357	0.020082	0.026856	0.0214613	0.024026	0.023552	0.0242217
	724	0.00566817	0.0108897	0.00931123	0.0154213	0.0201103	0.026721	0.0214657	0.023922	0.023666	0.0242287
	724.5	0.00565023	0.010846	0.0091634	0.015465	0.019974	0.026637	0.0216267	0.023969	0.0237697	0.0241617
	725	0.0055303	0.0108787	0.00912507	0.015612	0.019839	0.026663	0.021734	0.0240713	0.023679	0.024036
	725.5	0.00543383	0.0109307	0.00926763	0.01569	0.019994	0.026845	0.022006	0.0242623	0.0236127	0.0241107
	726	0.0055256	0.011122	0.00947967	0.0156527	0.020419	0.026926	0.0219393	0.0243577	0.023737	0.0242713
	726.5	0.00559243	0.011127	0.0094345	0.015491	0.0207447	0.026917	0.0219457	0.024482	0.023889	0.0245113
	727	0.0056126	0.0110457	0.00934763	0.0154223	0.0206933	0.026897	0.0219677	0.0246637	0.0239027	0.024626
	727.5	0.00557497	0.0110237	0.00931743	0.015451	0.02049	0.02703	0.0221453	0.0247997	0.0239417	0.024514
	728	0.0055347	0.011154	0.00939233	0.0155633	0.0204843	0.026933	0.0223053	0.0248563	0.0242173	0.024522
	728.5	0.00552617	0.011205	0.0094406	0.01552	0.020544	0.026968	0.0223897	0.0248903	0.024322	0.024792
	729	0.0055593	0.0111033	0.0095867	0.015502	0.0207557	0.026902	0.022284	0.0249693	0.0242217	0.0250757
	729.5	0.00561003	0.0110497	0.0097891	0.015607	0.0207977	0.02703	0.0221137	0.0249653	0.0241607	0.025174
	730	0.00565917	0.0111013	0.0099235	0.0156713	0.0207973	0.02693	0.0220313	0.0249473	0.0242867	0.0252797
	730.5	0.0056812	0.0111407	0.0099713	0.0157473	0.0206593	0.026988	0.0220257	0.0250253	0.0244803	0.0254013
	731	0.0055695	0.0109657	0.00991863	0.015794	0.020424	0.027092	0.0220947	0.0251283	0.0245413	0.0254333
	731.5	0.00539507	0.0108397	0.00979093	0.0158337	0.0202243	0.027372	0.0221293	0.025067	0.0244793	0.025393
	732	0.00543323	0.010865	0.00975097	0.0157723	0.0203657	0.027409	0.0221893	0.0251097	0.024378	0.0254293
	732.5	0.0055906	0.0110533	0.0097398	0.0156953	0.0206503	0.027529	0.0221357	0.025135	0.0245363	0.0255023
	733	0.0057196	0.0112317	0.00980143	0.0157187	0.0208	0.027617	0.0222147	0.0251213	0.024728	0.0254223
	733.5	0.0055475	0.01118	0.00976997	0.01573	0.020628	0.027734	0.022234	0.0249993	0.0249977	0.0253257
	734	0.00529357	0.0110523	0.0096833	0.0157467	0.0204703	0.027686	0.0222503	0.0249687	0.0250963	0.025193
	734.5	0.00504853	0.0107973	0.0096162	0.0157487	0.0203457	0.027652	0.0222243	0.0250907	0.0251107	0.0252507
	735	0.0051726	0.0108837	0.0097178	0.0158607	0.0203307	0.027781	0.0224837	0.0253433	0.0250013	0.0252993
	735.5	0.00523343	0.010843	0.00980517	0.01587	0.0204903	0.027911	0.0226333	0.025461	0.024824	0.0256013
	736	0.00541607	0.0109073	0.00975727	0.0158567	0.0207297	0.02788	0.0226757	0.0253697	0.0247913	0.0257883
	736.5	0.00560527	0.0110127	0.00957857	0.015824	0.0210553	0.027839	0.022666	0.0251803	0.024684	0.025786
	737	0.00591223	0.011406	0.0094359	0.0158623	0.021043	0.027853	0.022555	0.0251373	0.0245277	0.0255653
	737.5	0.00580603	0.0114643	0.00941577	0.0158443	0.0210577	0.027697	0.0224927	0.025081	0.0243873	0.025367
	738	0.00575067	0.0113973	0.00946997	0.0158317	0.0212357	0.027744	0.022365	0.0251423	0.024403	0.0251783
	738.5	0.00556593	0.0112083	0.0094809	0.0158033	0.0216363	0.027726	0.02234	0.0251007	0.0246087	0.025071
	739	0.0054303	0.011128	0.00931927	0.0157867	0.0216203	0.027696	0.022376	0.0250153	0.024894	0.025084
	739.5	0.0053182	0.0111163	0.00919687	0.0157877	0.0213297	0.027701	0.022383	0.0248123	0.0249987	0.0251133
	740	0.00540067	0.0110997	0.00912957	0.015781	0.020821	0.027634	0.02247	0.0248457	0.0247943	0.024994
	740.5	0.00545173	0.010982	0.00918267	0.015693	0.020703	0.027453	0.02245	0.0250377	0.0245383	0.024886
	741	0.00558153	0.0110667	0.0092081	0.015603	0.020528	0.027154	0.0223313	0.025165	0.0241897	0.024885
	741.5	0.0056306	0.0111737	0.00928963	0.015462	0.020194	0.027015	0.0220293	0.0248903	0.0237323	0.0248497
	742	0.00549733	0.0109687	0.00935897	0.0152633	0.0199147	0.026893	0.0216943	0.0245407	0.0233013	0.0246043
	742.5	0.00530353	0.0105488	0.0094435	0.0151097	0.019848	0.026845	0.0213433	0.024194	0.0233327	0.024408
	743	0.00521027	0.010366	0.0094033	0.0151383	0.0198827	0.026541	0.0210773	0.024041	0.0233133	0.0242417
	743.5	0.00515793	0.0103814	0.00926983	0.015111	0.0198267	0.026282	0.021063	0.0238373	0.023336	0.0240827
	744	0.00497413	0.010267	0.00905477	0.0150193	0.0196627	0.026044	0.021004	0.0236507	0.0233767	0.0237797
	744.5	0.00475137	0.0101185	0.00896223	0.0148627	0.0194407	0.025962	0.0207793	0.0233143	0.023415	0.023453
	745	0.0045651	0.00987417	0.00894303	0.0146243	0.019362	0.025607	0.020455	0.022819	0.0230887	0.023238
	745.5	0.0046492	0.0097659	0.00883467	0.0143857	0.0191213	0.025226	0.020282	0.022526	0.022599	0.0231007
	746	0.0047602	0.00984713	0.008674	0.0142473	0.0187383	0.025019	0.020096	0.0224847	0.0220567	0.0230543
	746.5	0.0048948	0.00999293	0.00852113	0.014154	0.0182833	0.025163	0.019709	0.0225273	0.0217037	0.0230513
	747	0.0049395	0.0100211	0.0082664	0.0139597	0.0179457	0.025238	0.0193897	0.022335	0.0215637	0.022812
	747.5	0.0048798	0.00982823	0.0079738	0.0136853	0.0178227	0.024829	0.0191753	0.0220173	0.0213387	0.0222503
	748	0.0045649	0.00937067	0.0079096	0.0133897	0.017663	0.024049	0.01903	0.021576	0.020854	0.0216607
	748.5	0.00435183	0.00910233	0.00791813	0.0131153	0.0176487	0.023419	0.018579	0.0211167	0.020539	0.0212947
	749	0.00435607	0.00914007	0.00798237	0.0128653	0.0176317	0.022976	0.0180777	0.0206053	0.020443	0.021118
	749.5	0.00446407	0.0093206	0.00784233	0.012712	0.017423	0.022555	0.0176583	0.0202083	0.0201417	0.0208147
	750	0.004513	0.00930053	0.0076583	0.0126467	0.017077	0.022279	0.0175037	0.019897	0.0195883	0.0205303
	750.5	0.00433647	0.0090672	0.00727913	0.0124543	0.0163537	0.021871	0.0174313	0.0194697	0.0191683	0.0201197
	751	0.00398753	0.00872443	0.00697223	0.0122177	0.0157963	0.021319	0.017305	0.0190033	0.018879	0.0197703
	751.5	0.00377273	0.0084581	0.00678497	0.0118735	0.015302	0.020574	0.017004	0.0185803	0.01857	0.0193677
	752	0.0038706	0.00836217	0.00662587	0.0116676	0.0150653	0.020132	0.016628	0.0183613	0.0182597	0.0189727
	752.5	0.00407343	0.00840083	0.00646683	0.0113644	0.014695	0.019951	0.016229	0.0182163	0.0179473	0.0186967
	753	0.00401943	0.0082755	0.00623827	0.0111482	0.014416	0.019908	0.015934	0.0180837	0.0175273	0.0184273
	753.5	0.00367803	0.0078574	0.00605937	0.0108742	0.014454	0.019136	0.015625	0.0177233	0.0170437	0.0179787
	754	0.0033469	0.00744243	0.0058598	0.0108148	0.014445	0.01856	0.015382	0.0172117	0.016461	0.017393
	754.5	0.0032233	0.0073331	0.00562553	0.0106738	0.014138	0.018221	0.0150673	0.0167577	0.0160333	0.017034
	755	0.003328	0.0074892	0.0055873	0.0104258	0.0135007	0.018117	0.014717	0.016432	0.0157313	0.0167913
	755.5	0.00327153	0.00746533	0.00565227	0.0101608	0.0131617	0.017615	0.014269	0.016171	0.015894	0.0165723
	756	0.00316233	0.00730943	0.00555023	0.0099841	0.012884	0.016982	0.013851	0.0156313	0.0160183	0.0163333
	756.5	0.00306117	0.00707277	0.0052995	0.0098441	0.012755	0.016674	0.013601	0.015308	0.0157277	0.0160363
	757	0.0031464	0.00702127	0.00528387	0.00969053	0.0125253	0.016895	0.013459	0.0150487	0.015125	0.015526
	757.5	0.00305577	0.00675543	0.0052959	0.009421	0.012308	0.017099	0.013197	0.014843	0.0147407	0.015071
	758	0.0029	0.00645127	0.0052486	0.00917263	0.0120687	0.016923	0.012889	0.0145087	0.0146903	0.014873
	758.5	0.00274883	0.0062103	0.00518487	0.00892717	0.0118653	0.016547	0.012568	0.0143377	0.014392	0.014653
	759	0.00269587	0.00610177	0.00536373	0.00876977	0.011781	0.016166	0.0123413	0.014325	0.013806	0.0142933
	759.5	0.00288053	0.00617227	0.0053355	0.0086025	0.011451	0.015658	0.012073	0.0141683	0.0133847	0.0138803
	760	0.00295823	0.00603057	0.00525327	0.0084497	0.010913	0.015078	0.0118813	0.0139257	0.0130693	0.013467
	760.5	0.00274563	0.00574667	0.00495493	0.00830797	0.01038	0.014816	0.0114943	0.013537	0.012753	0.0131117
	761	0.00241053	0.00545927	0.00476043	0.00818017	0.0101126	0.014655	0.0111113	0.0130807	0.0124823	0.0127137
	761.5	0.00229235	0.00544567	0.004593	0.00814293	0.00996257	0.014447	0.0107337	0.0125323	0.0121697	0.0125047
	762	0.00236918	0.00548013	0.00438063	0.00806653	0.00998807	0.01414	0.0106213	0.012258	0.011753	0.0121627
	762.5	0.00257057	0.00565747	0.00403257	0.007902	0.00977303	0.013715	0.0104077	0.0119413	0.011299	0.0121677
	763	0.0026837	0.0057335	0.0038442	0.00777553	0.0094939	0.013231	0.0100114	0.01171	0.010975	0.0119657
	763.5	0.00272887	0.00567587	0.00387843	0.00770657	0.00929647	0.013138	0.00955053	0.011421	0.0109277	0.011893
	764	0.00251593	0.00538263	0.00411663	0.00746827	0.00917597	0.013104	0.00943303	0.0111263	0.0108337	0.0116293
	764.5	0.0023543	0.00515283	0.00422157	0.0071871	0.00888823	0.012978	0.00961017	0.0107607	0.0105057	0.0113763
	765	0.0023433	0.00515427	0.0040327	0.0069227	0.00845043	0.012514	0.00974057	0.010353	0.0102645	0.0108517
	765.5	0.00237894	0.0050554	0.00354937	0.00663343	0.00801497	0.012111	0.00940823	0.0101348	0.0100863	0.0104129
	766	0.00215323	0.00478647	0.00327683	0.00617	0.00753207	0.011392	0.00878603	0.00995643	0.00975293	0.010126
	766.5	0.00190623	0.00449363	0.00307827	0.00586967	0.0075841	0.010791	0.00845677	0.00979223	0.0090873	0.009953
	767	0.001806	0.00426087	0.00294653	0.00567003	0.00775863	0.010447	0.00847707	0.00936843	0.008531	0.00981213
	767.5	0.00177615	0.00416287	0.0028737	0.0055874	0.00780073	0.010639	0.00833927	0.00896453	0.00814813	0.0095493
	768	0.0016752	0.00404897	0.00285567	0.00552267	0.00770167	0.010808	0.0078285	0.0086873	0.00797407	0.00932017
	768.5	0.00154349	0.0039865	0.00270633	0.00549997	0.00759643	0.010673	0.00728733	0.00871087	0.00776597	0.00899633
	769	0.00146691	0.00397353	0.00245983	0.00536847	0.007248	0.010133	0.0069845	0.0086433	0.00768833	0.00878537
	769.5	0.00138753	0.00393687	0.00234903	0.0050525	0.0067072	0.0097478	0.00677433	0.00847743	0.00753013	0.00860403
	770	0.00145497	0.00386583	0.0023977	0.0047495	0.00619227	0.0098447	0.00655607	0.0082505	0.00755263	0.00838247
	770.5	0.0015606	0.00382927	0.0025323	0.00468087	0.0059465	0.0096763	0.00646387	0.00795647	0.007516	0.0079606
	771	0.00153567	0.00378333	0.0026878	0.00468477	0.00583997	0.0091469	0.00636817	0.0076255	0.00741583	0.00750697
	771.5	0.0014024	0.00362883	0.002605	0.004698	0.00578623	0.0084345	0.00625067	0.0071722	0.00712613	0.0074433
	772	0.00143707	0.00353637	0.00243883	0.00462677	0.00559463	0.0081402	0.00595267	0.0067643	0.00696393	0.00732433
	772.5	0.00129027	0.003188	0.0024114	0.00457657	0.00521807	0.0081782	0.0056182	0.00647337	0.00653003	0.00740737
	773	0.000967367	0.002891	0.00220623	0.00437027	0.005021	0.0081996	0.00538263	0.0063795	0.00583477	0.00736343
	773.5	0.0009488	0.0029275	0.00192797	0.00422117	0.00487703	0.0079975	0.00546117	0.00633853	0.0053637	0.00749507
	774	0.001134	0.00309293	0.00178057	0.00404483	0.00488087	0.0077648	0.00535157	0.00617733	0.0054189	0.0070883
	774.5	0.0012219	0.00310853	0.001679	0.0039747	0.00468877	0.007588	0.00492737	0.0060064	0.0056252	0.00672573
	775	0.00107803	0.00292203	0.00155823	0.00388803	0.00440337	0.0073372	0.0046944	0.00568377	0.00567623	0.00644663
	775.5	0.000792333	0.0025747	0.0014812	0.00390037	0.00419413	0.0071049	0.00485597	0.00548987	0.00522867	0.00622973
	776	0.00065652	0.00234137	0.00143463	0.0038224	0.00435793	0.0068334	0.0052312	0.00546547	0.00505387	0.00574697
	776.5	0.0008033	0.0025935	0.00146353	0.0037127	0.0044868	0.006721	0.00515097	0.00530613	0.00493223	0.00544833
	777	0.0012443	0.00322153	0.00147	0.00367423	0.00423177	0.006663	0.00497583	0.00506027	0.00495987	0.0055441
	777.5	0.00129337	0.00324417	0.00152427	0.00365587	0.00400443	0.0065174	0.0048479	0.0050215	0.00481263	0.00534857
	778	0.00108173	0.0027456	0.0013911	0.00358233	0.00397713	0.0063375	0.00471473	0.0051743	0.0045474	0.00503003
	778.5	0.000869033	0.00232297	0.00126727	0.00335427	0.00378593	0.0063335	0.00429933	0.00520727	0.00421223	0.00493617
	779	0.000783367	0.0022116	0.00108198	0.00303933	0.00350583	0.006267	0.00393167	0.0050299	0.00401127	0.005178
	779.5	0.000778233	0.00228907	0.00110707	0.00286513	0.00330213	0.0062317	0.0038431	0.00490687	0.00404963	0.00529343
	780	0.000729493	0.002291	0.000943603	0.00284357	0.00323433	0.0059269	0.00359683	0.00486017	0.0042177	0.00516683
	780.5	0.00072479	0.00219797	0.000711003	0.00281673	0.00323743	0.0056935	0.0033979	0.00476413	0.00427923	0.0048258
	781	0.000772213	0.00207997	0.000462153	0.00268133	0.00332523	0.0054856	0.00342363	0.00471237	0.00433863	0.0045574
	781.5	0.000871833	0.00210557	0.000512144	0.0026476	0.00357793	0.0054208	0.00338353	0.0047089	0.00414727	0.00438713
	782	0.0012586	0.00279863	0.000478163	0.00261707	0.00384723	0.0053853	0.0030303	0.00437107	0.0040605	0.00432547
	782.5	0.00154323	0.00330977	0.000456218	0.0025715	0.00359723	0.005376	0.0029731	0.00394833	0.00394837	0.00431763
	783	0.0016142	0.00337837	0.000408444	0.00236167	0.00323443	0.0055479	0.0033742	0.00371657	0.00402103	0.00425467
	783.5	0.00129303	0.00290827	0.000330337	0.00213587	0.00306143	0.0059656	0.00375117	0.0039128	0.00362083	0.0042405
	784	0.0010697	0.00266353	0.000471932	0.0020102	0.0032228	0.0059899	0.00386007	0.00406267	0.00341417	0.0043053
	784.5	0.000911767	0.00257277	0.000858133	0.00209763	0.00317603	0.0054717	0.00397047	0.00407397	0.00332663	0.00440783
	785	0.0009699	0.0026098	0.00137187	0.00220563	0.0029949	0.0047852	0.00382233	0.00422663	0.00372263	0.00457993
	785.5	0.000861167	0.00233237	0.00139927	0.00217797	0.00323403	0.0043905	0.0034416	0.0042797	0.0038359	0.00470497
	786	0.000820963	0.0020478	0.00120153	0.00215927	0.00325763	0.00426	0.00300863	0.00404513	0.00362803	0.0047917
	786.5	0.000838033	0.00187893	0.0011323	0.00231367	0.00291037	0.004286	0.00297167	0.00386047	0.0031902	0.00453063
	787	0.000893933	0.00191977	0.00119406	0.0024648	0.0029374	0.0043626	0.0029879	0.0037281	0.0029331	0.00405303
	787.5	0.00105873	0.00220887	0.0011362	0.0025519	0.00315587	0.0044119	0.00303273	0.00356687	0.00287083	0.00362333
	788	0.00123133	0.0025459	0.000835423	0.0025695	0.00316983	0.0046111	0.00297147	0.003572	0.00303657	0.00363203
	788.5	0.0011706	0.00251327	0.000631317	0.0024761	0.0026084	0.0047145	0.00279797	0.0037916	0.00335143	0.0040495
	789	0.0009463	0.00217193	0.000601378	0.0022297	0.00205633	0.0050245	0.00280257	0.00379967	0.00322803	0.00434407
	789.5	0.0007956	0.0019525	0.000700003	0.0021196	0.0020801	0.0047757	0.00276877	0.00340417	0.0032302	0.00401817
	790	0.000895933	0.0018603	0.000703607	0.0020623	0.002242	0.0043959	0.00265633	0.00324423	0.00300593	0.00332203
	790.5	0.000882733	0.0017951	0.000533123	0.00212393	0.00200907	0.0041204	0.00228373	0.0034185	0.00314253	0.00305363
	791	0.000716883	0.0017583	0.000409847	0.00212067	0.0016723	0.004064	0.0021143	0.00347457	0.0031258	0.00330693
	791.5	0.000600687	0.00181907	0.000232365	0.0020737	0.00161423	0.0040531	0.00209837	0.00335367	0.00321797	0.00344653
	792	0.00058548	0.0017912	0.00016106	0.00190013	0.0017871	0.0041732	0.00207147	0.00331087	0.00298337	0.00344917
	792.5	0.000701963	0.00197213	0.00021194	0.00193913	0.0018079	0.0043797	0.0023903	0.0035259	0.00283647	0.00318217
	793	0.0009064	0.00217063	0.00029746	0.0019427	0.00148458	0.0041479	0.00279697	0.00356013	0.00277293	0.0028381
	793.5	0.00114207	0.0024144	0.000282807	0.00195387	0.00137196	0.0042827	0.0029443	0.00332817	0.0028893	0.00250393
	794	0.0011151	0.00233717	0.000298613	0.001833	0.00188157	0.0046145	0.0027989	0.003029	0.0028741	0.00262927
	794.5	0.000841933	0.0021842	0.000273647	0.00199613	0.0024278	0.0049003	0.00266607	0.00292927	0.0028268	0.0028987
	795	0.00068932	0.00209603	0.000272597	0.00206017	0.00230713	0.0052056	0.0024475	0.00318967	0.00278967	0.00325287
	795.5	0.000596297	0.00187823	0.00025399	0.0020829	0.0020912	0.0048683	0.0020923	0.00309323	0.00262187	0.003357
	796	0.00068762	0.00175463	0.000317087	0.00185913	0.0020073	0.0044947	0.00211117	0.0025996	0.00246717	0.0033086
	796.5	0.000955333	0.0020724	0.000363567	0.0017236	0.0020744	0.0041818	0.0022847	0.0023062	0.00257747	0.00305747
	797	0.0009944	0.00204547	0.000385	0.00168463	0.00196383	0.004032	0.00230123	0.00250703	0.00281097	0.00323117
	797.5	0.000725743	0.00164327	0.000364167	0.0015903	0.00188627	0.00336	0.00211727	0.0027321	0.00290867	0.00346067
	798	0.00048841	0.00133747	0.000295773	0.0015475	0.00195043	0.0030721	0.00206347	0.00275033	0.00279713	0.0034896
	798.5	0.000568197	0.00156253	0.000309473	0.00146357	0.0019055	0.0031166	0.00209493	0.00247783	0.00281027	0.00323547
	799	0.000841057	0.0020076	0.000410758	0.0016423	0.0016599	0.0036039	0.0022173	0.00220667	0.0025892	0.00309927
	799.5	0.00125973	0.0025594	0.00062181	0.00187393	0.00157113	0.0037113	0.00212087	0.0021441	0.00231233	0.0027607
	800	0.00142277	0.0027695	0.000604013	0.0021593	0.00143827	0.0036579	0.0021152	0.00193513	0.00207087	0.0027137
	800.5	0.0011754	0.0024294	0.000674457	0.00218863	0.00156863	0.0033977	0.00230767	0.00217193	0.00171637	0.00300047
	801	0.000747967	0.00185837	0.000725297	0.00201953	0.00146717	0.0032603	0.00255413	0.00281273	0.00157637	0.00363037
	801.5	0.00046066	0.00138487	0.000549936	0.0017957	0.00151747	0.0034593	0.00242187	0.00313723	0.00198007	0.00389483
	802	0.000374817	0.00111706	0.000300297	0.001593	0.0017753	0.0030064	0.00253853	0.00260853	0.00262037	0.00367683
	802.5	0.000477443	0.00113476	0.000208057	0.00172717	0.00176593	0.0027879	0.0025489	0.00234497	0.00316373	0.00318747
	803	0.00090033	0.00165437	0.000248007	0.00162383	0.0016883	0.0031368	0.0022828	0.00222133	0.00329843	0.0029559
	803.5	0.00113147	0.00215313	0.00031061	0.00144413	0.00163253	0.0040474	0.00188473	0.00197033	0.00301617	0.00269773
	804	0.00123207	0.00237173	0.0003527	0.00136017	0.00149017	0.0042009	0.00159503	0.0018455	0.00279093	0.0026145
	804.5	0.0010469	0.00219207	0.000415967	0.00148987	0.001425	0.0038618	0.00156107	0.00205957	0.00271647	0.00281063
	805	0.000845633	0.00197863	0.000365567	0.00165437	0.0017738	0.0036527	0.0015714	0.00243097	0.00248323	0.00337403
	805.5	0.000821867	0.00190187	0.000485047	0.0017654	0.00229603	0.0038121	0.00181303	0.00251503	0.0022395	0.00355253
	806	0.000808667	0.00175213	0.00055453	0.00172543	0.00232827	0.0037791	0.0021486	0.00252547	0.00204023	0.0034748
	806.5	0.000816933	0.0018831	0.000431367	0.00155013	0.00217333	0.003587	0.00242863	0.00253207	0.0019049	0.0036415
	807	0.000878167	0.0020416	0.000209497	0.00142957	0.00225767	0.0032017	0.0023211	0.00217653	0.00217443	0.0039372
	807.5	0.000935033	0.00192897	0.000130673	0.00151457	0.0022896	0.0027558	0.00215617	0.00209907	0.00264983	0.00375043
	808	0.0010695	0.00183867	0.000175297	0.0016229	0.00221677	0.0025732	0.00207377	0.00211773	0.00315883	0.00321717
	808.5	0.0011307	0.00190567	0.00026659	0.0015765	0.00221923	0.0029092	0.0017943	0.00229727	0.00300903	0.00267017
	809	0.00113327	0.00207497	0.000253697	0.0016219	0.0019704	0.0031932	0.00148247	0.00218573	0.00287027	0.00261457
	809.5	0.00114287	0.00232387	0.00023687	0.00168703	0.00180197	0.0036089	0.00142777	0.00224927	0.00310823	0.00240963
	810	0.00142597	0.00271853	0.000183147	0.00150917	0.00144296	0.0040067	0.00171854	0.00237773	0.00305467	0.00221923

## Sheet: Exp. A bottle 2
Experiment A		Average of Bottle 2 Chl fluorescence measurements [W]; time in hours
bottle 2		12	24	36	48	60	72	84	96	108	168
	Wavelength [nm]	Pm	Am	Pm	Am	Pm	Am	Pm	Am	Pm	Am
	400	0.00178967	0.00140547	0.000630083	0.00062865	0.000226393	0.00031253	0.000193323	0.000207247	1.27376e-05	0.000167045
	400.5	0.0018139	0.00144913	0.000610153	0.0006547	0.000254263	0.00035035	0.000233973	0.000185083	5.1738e-05	0.00012638
	401	0.00185543	0.0015002	0.000596387	0.00068328	0.00024167	0.00047757	0.000283713	0.000137683	4.06977e-05	0.000113101
	401.5	0.00187707	0.00149223	0.000622543	0.000668053	0.000288293	0.00054083	0.000266563	0.000122553	1.24956e-05	0.000126592
	402	0.00186887	0.00145647	0.000647457	0.000643457	0.000319067	0.00050528	0.000240467	0.00010798	1.18043e-06	0.000150462
	402.5	0.00184837	0.0014254	0.000642887	0.000614647	0.000316347	0.00040328	0.00023053	0.000101306	1.94187e-07	0.000203441
	403	0.00182357	0.00140713	0.000636997	0.000589393	0.00037148	0.00024455	0.00023738	6.8051e-05	4.745e-07	0.00021186
	403.5	0.0018316	0.00141243	0.00063255	0.000576343	0.00037956	0.00017975	0.00029724	6.0875e-05	0	0.00019765
	404	0.00185147	0.0014213	0.000644767	0.00054973	0.00035274	0.00018266	0.00033266	4.99387e-05	0	0.000185487
	404.5	0.00184287	0.00140337	0.000670197	0.000534963	0.000282967	0.00020208	0.00033215	5.59687e-05	0	0.00016344
	405	0.00184337	0.00141187	0.00065789	0.000558203	0.00018407	0.0002101	0.000300467	0.000107172	5.14153e-05	0.000130826
	405.5	0.0018241	0.00142237	0.000645683	0.00058618	0.000174967	0.0002363	0.00024216	0.000152307	0.000190353	9.803e-05
	406	0.00182617	0.0014327	0.000674447	0.000599747	0.000201877	0.0002616	0.000235947	0.000195683	0.00027828	8.32663e-05
	406.5	0.00188217	0.0014821	0.000673893	0.000579803	0.000230927	0.00031424	0.00021305	0.00020894	0.000325573	7.82657e-05
	407	0.00190947	0.0015086	0.000658943	0.000542997	0.000256917	0.00037553	0.000163443	0.000204697	0.000260257	9.28718e-05
	407.5	0.00192027	0.00152817	0.000637243	0.000522323	0.000269993	0.0004396	0.000128268	0.000197683	0.000168773	9.95233e-05
	408	0.00190987	0.00152607	0.000595737	0.00051233	0.000289757	0.00047645	8.42477e-05	0.00019011	0.000125547	0.00011329
	408.5	0.00189923	0.00152557	0.00059656	0.000505267	0.00030244	0.00050747	7.45307e-05	0.000165633	0.00012547	0.000132436
	409	0.0018827	0.0015058	0.00062476	0.000513647	0.000332363	0.00048936	8.03023e-05	0.00013549	6.83107e-05	0.000171094
	409.5	0.0019098	0.00150007	0.000649953	0.00053218	0.000365863	0.0004269	8.5328e-05	0.000129333	1.83687e-05	0.000205807
	410	0.00192893	0.00150343	0.000679067	0.00056516	0.000387727	0.00032936	0.000128347	0.000145353	1.32588e-06	0.00020692
	410.5	0.00197257	0.00153173	0.000696263	0.0005648	0.00034283	0.0002689	0.00015933	0.000177327	0	0.000198837
	411	0.00201857	0.00158817	0.0007208	0.000545627	0.00026644	0.00025804	0.000159923	0.00020258	1.41263e-05	0.000184466
	411.5	0.00203013	0.00160547	0.000780523	0.000518973	0.000204737	0.00030289	0.000147703	0.000212033	1.90763e-05	0.000145864
	412	0.00205647	0.00163543	0.000886353	0.000511043	0.00020948	0.00032927	0.00012715	0.00021606	1.20743e-05	0.000106219
	412.5	0.00205707	0.00164463	0.000967807	0.000524963	0.000274903	0.00030028	0.000146391	0.000222397	6.135e-07	9.34653e-05
	413	0.00208033	0.0016621	0.000982617	0.000552717	0.000296233	0.00028418	0.000167697	0.000222767	0	9.29947e-05
	413.5	0.00211303	0.0016693	0.00095185	0.00059422	0.00032952	0.00029911	0.00016925	0.00018291	0	0.000110103
	414	0.00217023	0.00168493	0.000897583	0.000638163	0.00033597	0.00033752	0.00016643	0.000133067	8.161e-08	0.000125081
	414.5	0.00227763	0.00175827	0.000870683	0.000677487	0.00037252	0.00032694	0.000188277	9.5421e-05	7.31567e-06	0.000147833
	415	0.00237197	0.00181833	0.000860653	0.000692093	0.000398243	0.0002842	0.00020963	9.90003e-05	2.5488e-05	0.000173363
	415.5	0.00240237	0.0018481	0.000859297	0.000692523	0.00040372	0.00026995	0.000238793	0.000167573	4.64442e-05	0.0002001
	416	0.002456	0.00188963	0.000875383	0.000703937	0.000393273	0.00029591	0.000226697	0.000240757	7.3135e-05	0.00022191
	416.5	0.00249967	0.00191933	0.000902037	0.000726023	0.000343683	0.00036821	0.000198513	0.000304817	9.3581e-05	0.000214137
	417	0.00259577	0.0019943	0.000938963	0.000758643	0.000371843	0.00039009	0.000218237	0.00030974	0.000110368	0.00021951
	417.5	0.00268183	0.0020538	0.000982137	0.000788677	0.000385567	0.00039974	0.000287457	0.00032483	9.87843e-05	0.000222467
	418	0.00273973	0.00209643	0.00103581	0.000811887	0.000441567	0.00042889	0.000365147	0.000327063	7.85e-05	0.000243603
	418.5	0.00278157	0.0021504	0.00108955	0.000842133	0.000493773	0.00044828	0.000418437	0.000329333	4.65192e-05	0.000262963
	419	0.00280983	0.00219753	0.00113305	0.00087221	0.000501527	0.00044708	0.00043466	0.000320997	6.86875e-07	0.00027543
	419.5	0.00286863	0.0022631	0.0012249	0.00088823	0.000535703	0.00042606	0.000398013	0.000300663	0	0.00027991
	420	0.00296053	0.0023575	0.0013039	0.000899347	0.000572567	0.00038388	0.000379017	0.00032235	0	0.0002804
	420.5	0.0031036	0.00245203	0.00139	0.00091359	0.000565553	0.0003975	0.000313433	0.000337797	0	0.000285317
	421	0.00323073	0.0025127	0.0014408	0.000949447	0.000531227	0.00041228	0.00027942	0.00036609	1.04907e-05	0.000264603
	421.5	0.00332493	0.00252813	0.00143567	0.00101893	0.000478103	0.00042975	0.000238793	0.0003409	4.76587e-05	0.00025428
	422	0.00341833	0.00257143	0.00145267	0.0010837	0.000427917	0.00045872	0.000263	0.000298757	0.000144677	0.000244443
	422.5	0.0035543	0.00268337	0.00147537	0.00114457	0.00045654	0.00051402	0.000306383	0.000280583	0.00017436	0.000230493
	423	0.00371563	0.00282183	0.00156127	0.00118337	0.00051669	0.00058293	0.000342907	0.000261457	0.000154589	0.000228503
	423.5	0.00388683	0.00296213	0.0016688	0.0012182	0.00057919	0.00063762	0.00038141	0.000237907	0.000154094	0.00023661
	424	0.00409097	0.00310803	0.00181073	0.00127037	0.000663633	0.00068343	0.000370633	0.000237503	0.0001966	0.000263187
	424.5	0.00431883	0.00327797	0.00192267	0.00133353	0.000716087	0.00071272	0.000367913	0.000209137	0.000240607	0.00029348
	425	0.00459683	0.00350827	0.0020477	0.00138293	0.000763157	0.00070873	0.000361057	0.00021621	0.000260507	0.000308023
	425.5	0.00487757	0.0037482	0.00215703	0.00143643	0.00079433	0.00064297	0.000387617	0.000281283	0.0002504	0.000313927
	426	0.00517367	0.00399293	0.00226257	0.00150493	0.00086365	0.00055417	0.00044844	0.00035943	0.00027809	0.000341103
	426.5	0.0054832	0.00421447	0.0023788	0.00160073	0.00091525	0.00049518	0.000520477	0.000407793	0.000364807	0.000370753
	427	0.00577383	0.0043679	0.00250223	0.0017074	0.00100859	0.00046541	0.00057968	0.00039713	0.000437063	0.000391537
	427.5	0.0060714	0.0045552	0.00265403	0.0017872	0.00108238	0.00050991	0.00059919	0.00034866	0.000445213	0.00041472
	428	0.0064071	0.00480287	0.0028447	0.00187687	0.00111612	0.00053696	0.00061037	0.00034013	0.000418157	0.000434013
	428.5	0.0067731	0.0051136	0.0030663	0.0019899	0.00117162	0.00059633	0.000621057	0.000418993	0.000395687	0.000473403
	429	0.00724437	0.0054697	0.0033057	0.00213797	0.00126543	0.00061822	0.000666397	0.000497913	0.000393333	0.00050709
	429.5	0.0077821	0.00582653	0.00355067	0.00231087	0.00135523	0.00065141	0.000686573	0.000553937	0.00045652	0.000548297
	430	0.0083653	0.0062219	0.00378703	0.0024719	0.00148627	0.00068635	0.00070868	0.000590367	0.000549757	0.00058054
	430.5	0.0089827	0.0066628	0.0040305	0.00260543	0.00162533	0.00074853	0.000729633	0.000657123	0.000615983	0.000624647
	431	0.00963033	0.0071586	0.00431663	0.00277053	0.00173017	0.00083205	0.0007884	0.000752917	0.00064386	0.00064402
	431.5	0.0103129	0.00765163	0.00464467	0.0029533	0.00184757	0.0008898	0.000865403	0.00084397	0.000649283	0.000662007
	432	0.0110693	0.00818	0.0050101	0.0031648	0.00194317	0.00095603	0.000918747	0.0008876	0.00065037	0.000681657
	432.5	0.0119127	0.00875547	0.00540163	0.0034079	0.00202767	0.0010228	0.000977003	0.00088505	0.000733647	0.000723183
	433	0.0128063	0.0093604	0.005827	0.0036473	0.0021624	0.0010603	0.00106137	0.00091875	0.00084324	0.000801217
	433.5	0.0137557	0.0100337	0.0062604	0.0038964	0.00231403	0.0010729	0.00115153	0.000976747	0.000977753	0.000884767
	434	0.0147547	0.0107553	0.0067186	0.0041459	0.0024305	0.0010759	0.0012391	0.00104398	0.00109072	0.000948213
	434.5	0.015773	0.0114893	0.00717673	0.00439323	0.0025837	0.0011496	0.0012893	0.00111924	0.00116743	0.000994813
	435	0.016886	0.0122813	0.0076503	0.00465347	0.00274303	0.0013109	0.00136163	0.00119375	0.00121693	0.00103462
	435.5	0.018171	0.013217	0.00823627	0.00499833	0.0029651	0.0014947	0.00144827	0.00127602	0.0012606	0.00111267
	436	0.0196947	0.014314	0.00889623	0.00541667	0.0031986	0.001618	0.00155037	0.00138607	0.00131717	0.0012122
	436.5	0.0214073	0.015575	0.00964643	0.00589587	0.00342213	0.001698	0.00168923	0.0015006	0.00141207	0.0013283
	437	0.0233213	0.016945	0.0105113	0.00642527	0.0036622	0.0017497	0.00185927	0.0016187	0.00155133	0.00144713
	437.5	0.0252823	0.0182987	0.0114157	0.00695423	0.00395673	0.0018443	0.00207557	0.001739	0.00175227	0.00155523
	438	0.027364	0.0197573	0.012398	0.0075226	0.00431297	0.0019891	0.00227433	0.0019038	0.0019461	0.00166753
	438.5	0.0295727	0.0212913	0.0134547	0.0081059	0.0047181	0.0021575	0.00247457	0.00211507	0.0021357	0.00177493
	439	0.03193	0.0229747	0.0145543	0.00872537	0.00511537	0.0023662	0.00264937	0.00232427	0.00227827	0.0019095
	439.5	0.0344923	0.0248127	0.0157283	0.00939883	0.00550563	0.0025516	0.0028261	0.00252803	0.0024057	0.00204987
	440	0.0372043	0.0267423	0.0169867	0.010131	0.00592057	0.0027442	0.00300577	0.00268063	0.0026082	0.00221267
	440.5	0.04015	0.0288553	0.0183377	0.010971	0.0063913	0.0029373	0.00323523	0.00283813	0.0028284	0.0023984
	441	0.0433537	0.0311583	0.019786	0.0118637	0.00695173	0.0031964	0.00352167	0.00304007	0.00307033	0.0026111
	441.5	0.0468157	0.0337453	0.021364	0.0128413	0.0075439	0.0034816	0.00386327	0.00329233	0.00336867	0.00286663
	442	0.0505673	0.03655	0.0231077	0.0139117	0.0081768	0.0037782	0.00422513	0.0035554	0.0037004	0.0031303
	442.5	0.0544917	0.0394637	0.0250087	0.0150613	0.0088339	0.0040413	0.00457333	0.0038644	0.00401927	0.00339107
	443	0.0587133	0.0425277	0.0271263	0.0163307	0.00954993	0.004305	0.00495717	0.0041885	0.00432577	0.00367227
	443.5	0.0633	0.045842	0.0294033	0.0176903	0.0103629	0.0046105	0.00537997	0.0045526	0.00465437	0.00394787
	444	0.068342	0.049598	0.0318877	0.0191583	0.0112547	0.0049709	0.00584967	0.004979	0.00506187	0.0042795
	444.5	0.073705	0.0536877	0.0345143	0.0207413	0.0122707	0.0053637	0.00635927	0.0054161	0.00552027	0.00462007
	445	0.079402	0.0580803	0.037357	0.0224807	0.0133597	0.0058285	0.00691063	0.00590897	0.0059653	0.0050123
	445.5	0.085426	0.0627177	0.0404177	0.0243683	0.0144983	0.006328	0.0074712	0.00641357	0.006399	0.005416
	446	0.0919917	0.067718	0.0437737	0.0264343	0.0157	0.0069285	0.00809843	0.00695157	0.00688003	0.00582753
	446.5	0.0992337	0.0732367	0.04751	0.0287487	0.0170337	0.007584	0.00882703	0.00755573	0.0074824	0.0063101
	447	0.107025	0.0791633	0.051508	0.0312153	0.0185487	0.0083513	0.00960167	0.00821087	0.00818807	0.006821
	447.5	0.115363	0.085524	0.0557983	0.0339247	0.020192	0.0091574	0.0104768	0.00893393	0.0089661	0.00739027
	448	0.124357	0.0923607	0.060509	0.0369097	0.0219813	0.0099938	0.0114261	0.00968747	0.00981417	0.0080029
	448.5	0.13407	0.0998347	0.065677	0.0402433	0.0239277	0.010865	0.0124357	0.0104997	0.0106911	0.00863343
	449	0.14483	0.108182	0.0714637	0.043939	0.0260817	0.011795	0.0136033	0.011396	0.011581	0.00933023
	449.5	0.156447	0.11729	0.0777647	0.047921	0.0284537	0.012813	0.014804	0.0123872	0.0125323	0.0101368
	450	0.16893	0.127043	0.0845167	0.0521377	0.0309997	0.013986	0.0161437	0.0134757	0.0135783	0.0110418
	450.5	0.18214	0.1374	0.091705	0.0565733	0.0336973	0.015198	0.0175803	0.01467	0.0147373	0.0120373
	451	0.196513	0.14874	0.099561	0.0614353	0.0367267	0.016497	0.019173	0.0159927	0.016049	0.0131123
	451.5	0.211913	0.161253	0.108177	0.0667923	0.0400433	0.017914	0.0209193	0.0174297	0.0174677	0.0142657
	452	0.226637	0.174647	0.117417	0.0726457	0.043657	0.019475	0.0227593	0.0190057	0.018956	0.0154893
	452.5	0.2385	0.188933	0.127367	0.078991	0.0475517	0.021217	0.024716	0.0206767	0.0205903	0.0168197
	453	0.245947	0.203837	0.137927	0.0857827	0.051698	0.023086	0.0268057	0.0224413	0.0223803	0.0182507
	453.5	0.24919	0.218277	0.149247	0.0930647	0.056265	0.025077	0.0290627	0.0242767	0.024405	0.0197827
	454	0.250047	0.231303	0.161017	0.100798	0.0611107	0.02723	0.0314727	0.026212	0.0265827	0.0214107
	454.5	0.24937	0.240443	0.171317	0.108887	0.0660937	0.029528	0.0339883	0.0282317	0.02875	0.023123
	455	0.24823	0.244913	0.177923	0.11738	0.0713137	0.031862	0.036663	0.0304267	0.0309757	0.024924
	455.5	0.24646	0.245853	0.180873	0.12615	0.076613	0.034262	0.0394607	0.032726	0.0333223	0.026802
	456	0.24493	0.24493	0.18072	0.13519	0.082067	0.03661	0.0424053	0.035122	0.0356937	0.028739
	456.5	0.2434	0.2434	0.17965	0.144327	0.0876803	0.039039	0.0454227	0.0375667	0.0381327	0.0307047
	457	0.24217	0.24217	0.17876	0.153697	0.0934147	0.041601	0.0484703	0.0400173	0.040595	0.0327737
	457.5	0.24099	0.24099	0.17789	0.16284	0.0991977	0.044261	0.0515013	0.0424877	0.0431183	0.034868
	458	0.23963	0.23963	0.17686	0.16994	0.104729	0.046821	0.054363	0.0447873	0.0456203	0.0368633
	458.5	0.2385	0.2385	0.17602	0.174193	0.109986	0.049251	0.0570607	0.047023	0.048038	0.03876
	459	0.23728	0.23728	0.17514	0.175577	0.11501	0.051447	0.0596617	0.0491697	0.0502517	0.0405307
	459.5	0.23619	0.23619	0.17435	0.17513	0.119787	0.0535	0.062107	0.0512363	0.0522723	0.0422073
	460	0.23524	0.23524	0.17366	0.17444	0.12423	0.055442	0.0643853	0.0532337	0.0541803	0.0437787
	460.5	0.23421	0.23421	0.17284	0.17365	0.128017	0.057092	0.0662903	0.0548967	0.055815	0.045201
	461	0.23343	0.23343	0.17218	0.17301	0.13116	0.058451	0.067843	0.0561917	0.0571903	0.0463943
	461.5	0.23281	0.23281	0.17168	0.17253	0.133603	0.059477	0.0690943	0.0571323	0.0582647	0.047357
	462	0.232	0.232	0.17107	0.17194	0.135253	0.060203	0.0699183	0.057687	0.058994	0.0479683
	462.5	0.23145	0.23145	0.17069	0.17158	0.13621	0.060618	0.0703623	0.058041	0.0595	0.048284
	463	0.23094	0.23094	0.17032	0.17121	0.13631	0.060511	0.070311	0.0580397	0.0596127	0.048299
	463.5	0.2307	0.2307	0.17014	0.17104	0.135953	0.060126	0.0700093	0.0578947	0.0595247	0.0481463
	464	0.22984	0.22984	0.1695	0.17041	0.13487	0.059401	0.0694017	0.0574307	0.0591037	0.0478113
	464.5	0.22874	0.22874	0.16869	0.16961	0.13296	0.058453	0.0683783	0.056618	0.0583157	0.0472153
	465	0.22772	0.22772	0.16797	0.16886	0.130337	0.057313	0.0669293	0.0555047	0.057271	0.0463997
	465.5	0.22678	0.22678	0.16729	0.16816	0.12696	0.055825	0.0651713	0.0540627	0.055874	0.045301
	466	0.22627	0.22627	0.16687	0.16774	0.123237	0.054145	0.063215	0.0524327	0.0543317	0.044054
	466.5	0.22566	0.22566	0.16635	0.16726	0.11927	0.052303	0.0611623	0.0507353	0.052679	0.0426837
	467	0.22501	0.22501	0.16577	0.16674	0.114973	0.050319	0.058919	0.0488853	0.050814	0.0411883
	467.5	0.22476	0.22476	0.16559	0.16656	0.110438	0.048209	0.056518	0.0469723	0.0488793	0.039597
	468	0.22425	0.22425	0.16529	0.16602	0.105631	0.046007	0.0540773	0.0449593	0.0468113	0.0379207
	468.5	0.22411	0.22411	0.16528	0.164583	0.10085	0.043815	0.0516833	0.0429443	0.044782	0.0362463
	469	0.22426	0.22426	0.16546	0.161637	0.0960863	0.041613	0.0493017	0.040984	0.042748	0.0345923
	469.5	0.22388	0.22388	0.1652	0.156447	0.091421	0.039524	0.0468627	0.039047	0.0407067	0.032906
	470	0.22281	0.22281	0.16442	0.149583	0.0867797	0.037535	0.0444037	0.0371237	0.0387007	0.03122
	470.5	0.2215	0.2215	0.16344	0.142367	0.082434	0.035792	0.0421	0.0353323	0.0368493	0.0296233
	471	0.22001	0.22001	0.16235	0.13554	0.0784267	0.034153	0.0399723	0.0336193	0.0351427	0.0281723
	471.5	0.21918	0.21918	0.16176	0.129397	0.0748487	0.032626	0.038101	0.0320543	0.033586	0.0269127
	472	0.21817	0.21817	0.16103	0.12367	0.0715437	0.031061	0.0364	0.030565	0.0320753	0.025768
	472.5	0.21698	0.21698	0.16015	0.118237	0.06839	0.029586	0.0348157	0.0291703	0.030648	0.0247027
	473	0.21586	0.21586	0.15932	0.11325	0.0654823	0.028301	0.033392	0.0279363	0.0293277	0.023708
	473.5	0.21484	0.21484	0.15853	0.108657	0.0628633	0.027124	0.0320707	0.02681	0.028149	0.0227797
	474	0.21393	0.213913	0.157303	0.104413	0.0604287	0.026107	0.0308517	0.0257563	0.027086	0.02188
	474.5	0.21301	0.212723	0.15528	0.100533	0.0582233	0.025158	0.0297297	0.0248223	0.0261527	0.021059
	475	0.21166	0.210617	0.152287	0.096966	0.0561067	0.024347	0.0286843	0.023996	0.025304	0.0203113
	475.5	0.20985	0.2076	0.148337	0.0936783	0.0541843	0.023577	0.0277613	0.023213	0.0244733	0.0196303
	476	0.2082	0.204263	0.14421	0.090628	0.052446	0.022872	0.0269197	0.0224863	0.0236903	0.0190177
	476.5	0.20706	0.20079	0.140043	0.0878043	0.0508397	0.022206	0.026152	0.021811	0.0229387	0.0183883
	477	0.20645	0.19736	0.135973	0.0852203	0.049337	0.021526	0.0254177	0.0212333	0.022247	0.017801
	477.5	0.20592	0.19371	0.132143	0.0828443	0.0479277	0.020936	0.0246967	0.02069	0.0216523	0.017278
	478	0.20462	0.189617	0.12826	0.080478	0.046483	0.020333	0.0239667	0.0200993	0.0210383	0.0167993
	478.5	0.20253	0.18502	0.12412	0.077969	0.0449557	0.019738	0.0231813	0.0194663	0.0204223	0.0163163
	479	0.20023	0.179903	0.11983	0.07535	0.0433907	0.019163	0.0223547	0.0187827	0.0197533	0.0158117
	479.5	0.19828	0.174283	0.115477	0.0726693	0.041797	0.018582	0.0215417	0.0181233	0.01909	0.0152707
	480	0.196957	0.16858	0.111423	0.070094	0.0403337	0.017992	0.0208017	0.0174813	0.0184447	0.0147327
	480.5	0.195077	0.162597	0.107463	0.067559	0.0388617	0.017427	0.020109	0.0168877	0.0177763	0.0142187
	481	0.192227	0.156537	0.103507	0.065057	0.0373993	0.016838	0.019407	0.0163263	0.0170887	0.0136767
	481.5	0.188093	0.15045	0.099496	0.062562	0.0359177	0.016228	0.018679	0.0157523	0.016379	0.0131377
	482	0.182797	0.14422	0.0953577	0.06001	0.0344153	0.015633	0.0178907	0.015119	0.0157127	0.0125983
	482.5	0.17655	0.138127	0.0912847	0.057513	0.0329813	0.015059	0.017129	0.0145047	0.015086	0.0120773
	483	0.169427	0.132023	0.0873173	0.0550687	0.0315943	0.014442	0.0163813	0.0138963	0.0144747	0.011579
	483.5	0.161787	0.126003	0.083421	0.0526723	0.030245	0.013828	0.0156757	0.01331	0.0138343	0.0110633
	484	0.15418	0.12022	0.07971	0.0503837	0.028951	0.013227	0.0150257	0.0127453	0.0132407	0.0105537
	484.5	0.146757	0.114623	0.0760973	0.0481323	0.027664	0.012676	0.0143737	0.012193	0.0126283	0.010088
	485	0.13948	0.10917	0.072524	0.0459443	0.0263973	0.012217	0.0137117	0.0116656	0.0120677	0.0096657
	485.5	0.13251	0.10392	0.069076	0.0438743	0.0251723	0.01176	0.01309	0.0111654	0.0115667	0.0092804
	486	0.125813	0.0989023	0.0657927	0.0419247	0.024022	0.011274	0.012501	0.0106821	0.0111026	0.0089071
	486.5	0.11949	0.0941307	0.0627813	0.0401067	0.0229643	0.010807	0.0120007	0.010209	0.0106812	0.00852463
	487	0.113553	0.0897273	0.060023	0.0384193	0.0219957	0.010405	0.0115637	0.0097953	0.010254	0.00816527
	487.5	0.108113	0.0856713	0.0575027	0.036868	0.021155	0.010074	0.0111397	0.0094329	0.00982007	0.00781673
	488	0.102948	0.0818183	0.0550753	0.0353737	0.0203547	0.0097605	0.0107126	0.00909613	0.00941907	0.0074904
	488.5	0.0981213	0.0782563	0.052788	0.0339677	0.0196243	0.009418	0.0102985	0.0087782	0.0090717	0.00721413
	489	0.093535	0.074873	0.0506347	0.032638	0.0189173	0.0090838	0.00990117	0.00845523	0.00876353	0.00697107
	489.5	0.0893523	0.0717587	0.0486823	0.0314307	0.0182503	0.0088483	0.0095654	0.0081532	0.0084994	0.0067567
	490	0.0855617	0.0689163	0.046949	0.030388	0.0176397	0.0086438	0.00927617	0.0078938	0.0082441	0.00654397
	490.5	0.082081	0.0662547	0.045364	0.0294447	0.017058	0.0084243	0.00901363	0.0076629	0.00797667	0.00635767
	491	0.07881	0.063796	0.043874	0.0285683	0.01654	0.0081928	0.00878227	0.0074477	0.007725	0.00616577
	491.5	0.0756703	0.061432	0.0424377	0.0277187	0.0160527	0.0079759	0.00853923	0.0072647	0.0075019	0.00599493
	492	0.0728093	0.0593047	0.041109	0.0269267	0.01564	0.0078127	0.00832663	0.00709873	0.00729187	0.00584583
	492.5	0.0701783	0.057374	0.0399173	0.026236	0.015269	0.0076243	0.00812943	0.0069616	0.0071105	0.00570793
	493	0.0677587	0.0556173	0.0388303	0.0256137	0.0149077	0.0074685	0.00796367	0.00684637	0.00695527	0.00561363
	493.5	0.0654943	0.0539963	0.037862	0.025055	0.0146133	0.0073549	0.0078284	0.00674713	0.00683783	0.0055159
	494	0.0633103	0.0524317	0.0369523	0.0245167	0.0143503	0.0072927	0.0076978	0.0066573	0.0067325	0.0054444
	494.5	0.0611787	0.0508737	0.0360387	0.0239853	0.0141367	0.0072272	0.00759487	0.00656773	0.00658753	0.00538743
	495	0.059087	0.0493057	0.0351383	0.0234733	0.0139013	0.0071314	0.00748043	0.00645727	0.0064185	0.00528147
	495.5	0.057098	0.0477853	0.0342677	0.0229723	0.0136417	0.0070493	0.00736863	0.0063642	0.0062498	0.00517603
	496	0.0552263	0.0463963	0.0334283	0.0224843	0.013362	0.006964	0.00725497	0.00626793	0.00611873	0.00505783
	496.5	0.0534567	0.0450953	0.0326087	0.0220117	0.0131053	0.0068514	0.00717413	0.0061488	0.00602873	0.00496963
	497	0.051759	0.043875	0.0318367	0.0215817	0.0128737	0.0067332	0.0070931	0.00600967	0.00595587	0.00492233
	497.5	0.0500563	0.0426527	0.0310607	0.0211567	0.012656	0.0066207	0.0069902	0.0058687	0.00588657	0.00486053
	498	0.0483283	0.0414003	0.0302993	0.0207303	0.0124213	0.0065278	0.0068656	0.00575953	0.0058048	0.00478733
	498.5	0.0466127	0.040139	0.0295323	0.0202647	0.0121817	0.006456	0.00674857	0.00569273	0.00569217	0.00470067
	499	0.0448507	0.0387947	0.0287193	0.01979	0.0119433	0.0063659	0.0066304	0.00561167	0.00558293	0.00462903
	499.5	0.0431267	0.037455	0.0279277	0.0193243	0.011703	0.0062936	0.0064826	0.0055137	0.0054544	0.0045645
	500	0.0414727	0.0361793	0.0271353	0.018875	0.0114733	0.006193	0.006329	0.00541693	0.00532907	0.00450633
	500.5	0.0398657	0.034978	0.0263493	0.0184503	0.011256	0.0060582	0.00620107	0.00531563	0.00521513	0.0044542
	501	0.0383297	0.033822	0.0255763	0.018023	0.0110653	0.0059927	0.00608707	0.00523253	0.00511833	0.00441197
	501.5	0.036803	0.0326467	0.0247997	0.0175617	0.0109012	0.0059262	0.00598493	0.00511717	0.0050393	0.00436943
	502	0.0352997	0.0314773	0.0240497	0.0171	0.0106945	0.0058832	0.0058481	0.00497473	0.00496607	0.00429993
	502.5	0.0338167	0.0303197	0.0232983	0.01663	0.0104459	0.0057777	0.0057526	0.00485623	0.0048666	0.00419623
	503	0.0323373	0.029158	0.022535	0.01616	0.0101719	0.0056345	0.0056299	0.00474973	0.00472017	0.00408763
	503.5	0.0309277	0.028053	0.0217857	0.0157007	0.00989963	0.0054981	0.005508	0.00471133	0.00455263	0.00399247
	504	0.029643	0.02703	0.0210677	0.015242	0.0096554	0.0053861	0.00538	0.00466433	0.00438407	0.0039168
	504.5	0.028443	0.02605	0.0203957	0.0147953	0.009369	0.0052602	0.00526983	0.0045975	0.00428983	0.00383497
	505	0.0272943	0.025089	0.019712	0.01438	0.00911263	0.0051482	0.0051962	0.0045042	0.00420387	0.0037594
	505.5	0.026177	0.0241537	0.019045	0.013984	0.00889583	0.0050288	0.00511107	0.0043948	0.00414413	0.00369197
	506	0.0250597	0.0232563	0.0184043	0.013621	0.00871177	0.0049005	0.00503883	0.00430077	0.0040675	0.00363213
	506.5	0.0239733	0.0224193	0.017838	0.0132737	0.0085715	0.0047689	0.00495977	0.00420283	0.00398927	0.00358937
	507	0.0229513	0.0216023	0.017335	0.0129433	0.00842043	0.0046817	0.00488693	0.00411883	0.00391253	0.00354497
	507.5	0.0220357	0.020805	0.016845	0.0126243	0.00826937	0.0046329	0.00481433	0.00405093	0.00382133	0.0034969
	508	0.0211713	0.0200573	0.016354	0.0123173	0.00809517	0.0045948	0.00472107	0.00398937	0.00372853	0.0034594
	508.5	0.0203613	0.019389	0.0158883	0.0120687	0.00790787	0.0045179	0.00464497	0.00393167	0.00368337	0.00341347
	509	0.0195523	0.01874	0.0154117	0.011814	0.00775963	0.0044259	0.00457843	0.00387427	0.00360197	0.00337817
	509.5	0.0187973	0.0181143	0.014965	0.0115533	0.00764347	0.004349	0.0045259	0.00381767	0.00353213	0.00333343
	510	0.0181163	0.017507	0.0145433	0.011272	0.00753637	0.0042969	0.0044894	0.00377603	0.0034314	0.0032911
	510.5	0.0174563	0.016923	0.014167	0.0109927	0.0074223	0.0042701	0.00443507	0.00374873	0.00334957	0.0032563
	511	0.0168477	0.0163753	0.0138297	0.010764	0.00729427	0.0042667	0.0043927	0.00371313	0.0033094	0.00322777
	511.5	0.0162403	0.0158387	0.013473	0.0105883	0.0071904	0.0042946	0.0043796	0.00368147	0.0032881	0.00320667
	512	0.015699	0.015371	0.013113	0.0104203	0.0070658	0.0043126	0.00438267	0.0036619	0.00332173	0.00317553
	512.5	0.0151827	0.0149553	0.0127647	0.0102324	0.00694027	0.0042652	0.00436867	0.00363257	0.0033373	0.00313637
	513	0.0146943	0.0145343	0.012455	0.00999817	0.00683613	0.0041429	0.00431313	0.00361103	0.0033226	0.003098
	513.5	0.014232	0.014113	0.0121467	0.00975073	0.00677383	0.0040295	0.00425893	0.00357433	0.00330527	0.00307143
	514	0.0137573	0.0136793	0.0118527	0.00953267	0.0067216	0.0039763	0.004214	0.00354093	0.00331093	0.00307783
	514.5	0.013328	0.013308	0.0115537	0.0093555	0.0066367	0.0039766	0.00418653	0.00351593	0.00331877	0.00308227
	515	0.0128813	0.012946	0.0112647	0.00916873	0.00652377	0.0040107	0.00413857	0.00348683	0.0032688	0.00307613
	515.5	0.0124567	0.012578	0.0109963	0.0089745	0.00640853	0.004017	0.00408837	0.00345133	0.00318407	0.0030709
	516	0.011989	0.0121593	0.010728	0.00877163	0.00629083	0.0039306	0.0040425	0.0034363	0.00313053	0.00306513
	516.5	0.0115627	0.011766	0.010488	0.00856613	0.00620057	0.0038435	0.0039974	0.00341843	0.00311917	0.00306603
	517	0.011176	0.0114133	0.0102256	0.00839423	0.0060791	0.0037664	0.0039596	0.00338573	0.00309177	0.0030512
	517.5	0.0108223	0.011077	0.009925	0.00823437	0.00597487	0.0037347	0.0039546	0.0033294	0.0030156	0.00302693
	518	0.010468	0.0107302	0.0096049	0.00806637	0.00587397	0.0037362	0.0039415	0.00326147	0.00295263	0.00297773
	518.5	0.0100791	0.0103783	0.00928723	0.0078859	0.0058078	0.0036523	0.00390783	0.00321087	0.00290063	0.0029416
	519	0.00970627	0.0100377	0.0090261	0.00767077	0.00574353	0.0035227	0.00381567	0.00318827	0.00290237	0.00289957
	519.5	0.0093889	0.0097336	0.008769	0.00746097	0.00564423	0.0034258	0.0037226	0.0031535	0.00289287	0.00285277
	520	0.00911547	0.00944353	0.0084916	0.00725413	0.00548077	0.0033654	0.00365923	0.00311073	0.00287473	0.00280913
	520.5	0.0088355	0.00913733	0.00822337	0.00704823	0.00528253	0.0033536	0.00362667	0.0030379	0.00283493	0.00275533
	521	0.00850277	0.00880637	0.00795233	0.0068466	0.00512597	0.0032932	0.00358533	0.00298593	0.00276017	0.00268873
	521.5	0.0081602	0.0084817	0.0077014	0.00664113	0.0050254	0.0032181	0.00349703	0.0029331	0.00269727	0.0026425
	522	0.00786503	0.00818883	0.00744017	0.006458	0.00493843	0.0031351	0.00338953	0.00289847	0.0026318	0.0026113
	522.5	0.00761083	0.00793163	0.0071724	0.0062819	0.00483453	0.0030607	0.00329247	0.00285457	0.0025836	0.00260847
	523	0.0073314	0.0076501	0.006919	0.00609953	0.00470513	0.0030004	0.00321537	0.0028136	0.0025388	0.00258373
	523.5	0.00704787	0.00737107	0.00670597	0.00590407	0.00456703	0.0029554	0.00316933	0.0027549	0.00249267	0.00254413
	524	0.0067654	0.0071051	0.00646977	0.00571287	0.00444223	0.002888	0.00311587	0.0026774	0.00243763	0.00248487
	524.5	0.00651903	0.00687183	0.00624747	0.00552583	0.004308	0.0028057	0.00306493	0.0025877	0.0023787	0.0024131
	525	0.00628993	0.00663457	0.0060066	0.00535287	0.00414337	0.002705	0.00299447	0.0025074	0.00228533	0.00232253
	525.5	0.00605263	0.00639983	0.00578567	0.0051712	0.00398957	0.0026078	0.0029047	0.00244847	0.0022081	0.00222403
	526	0.00582603	0.00618053	0.00558597	0.00499923	0.0038581	0.0025435	0.00281657	0.0024064	0.00217533	0.0021567
	526.5	0.0056079	0.00595643	0.00536727	0.00483573	0.00374353	0.002468	0.0027537	0.0023738	0.00214373	0.00211373
	527	0.00538977	0.0057197	0.00517213	0.0046972	0.00364503	0.0024142	0.0026849	0.0023171	0.0021363	0.00207243
	527.5	0.00520403	0.00552143	0.00500077	0.0045574	0.003554	0.0023474	0.00260037	0.0022414	0.00209023	0.0020359
	528	0.00505	0.00532517	0.00485177	0.00441157	0.0034697	0.0022922	0.00249497	0.0021335	0.00202427	0.00198843
	528.5	0.00492627	0.00516553	0.0046968	0.00424777	0.0033694	0.0022298	0.0023893	0.0020458	0.00196577	0.00194867
	529	0.00479433	0.00500217	0.00452967	0.00410713	0.00321923	0.0021464	0.0023354	0.0019839	0.00191197	0.00189647
	529.5	0.0046535	0.00485183	0.00436057	0.00396473	0.00306747	0.0020796	0.0022697	0.0019473	0.0018578	0.0018481
	530	0.00449297	0.00472517	0.00422457	0.00383873	0.00292337	0.0020155	0.0021945	0.00191413	0.00179977	0.00179923
	530.5	0.00434877	0.00459347	0.0041043	0.00371257	0.00284587	0.0019846	0.00211	0.0018832	0.00170483	0.00175107
	531	0.00420013	0.00443263	0.00400547	0.00361737	0.00280997	0.0019606	0.00204063	0.0018518	0.00163417	0.0016972
	531.5	0.00407	0.0042887	0.00389757	0.00355147	0.0027479	0.0019302	0.0019957	0.00181863	0.00158147	0.00164093
	532	0.00393077	0.00414317	0.00375533	0.00347897	0.0026511	0.0019323	0.00196463	0.0017707	0.0015516	0.00160213
	532.5	0.00380627	0.00402827	0.0036092	0.00337043	0.00252623	0.0019351	0.00191717	0.0017052	0.00152563	0.00155623
	533	0.00369083	0.00391767	0.00346643	0.0032307	0.00243543	0.001917	0.0018648	0.0016319	0.00148163	0.00152573
	533.5	0.00360477	0.00381403	0.00333867	0.00308977	0.0024134	0.0018425	0.00182543	0.00157143	0.00142713	0.00148537
	534	0.00354097	0.00371963	0.00324157	0.00298447	0.002383	0.0017357	0.00179543	0.00150723	0.0013585	0.00144907
	534.5	0.00342067	0.00359453	0.00313437	0.0029009	0.00231987	0.0016293	0.00178097	0.0014413	0.0013108	0.00141797
	535	0.00328747	0.00346563	0.00304853	0.00282143	0.0022267	0.0015271	0.00173117	0.00136137	0.00127527	0.00138927
	535.5	0.00313107	0.00331443	0.00295573	0.00274843	0.0021366	0.0014429	0.00165237	0.00132893	0.0012547	0.00134317
	536	0.00301017	0.0031665	0.00287453	0.00267493	0.00206053	0.0013951	0.0015965	0.0013241	0.00124037	0.00128787
	536.5	0.00292933	0.0030423	0.00277047	0.00258203	0.00199123	0.0013496	0.00151077	0.00133667	0.00119033	0.00122957
	537	0.00286463	0.00295177	0.0026796	0.0024992	0.00196053	0.0013434	0.0014477	0.00133367	0.00117413	0.0011741
	537.5	0.0028149	0.00290593	0.00259953	0.00241697	0.0019315	0.0013542	0.0013806	0.00130833	0.0011283	0.00114333
	538	0.0027627	0.0028799	0.002543	0.00236177	0.0018821	0.0013794	0.0013236	0.0012733	0.00110427	0.00110883
	538.5	0.00271393	0.00284597	0.00248717	0.00229417	0.00180683	0.0013898	0.00129863	0.0012029	0.00108068	0.00108097
	539	0.00266917	0.00278873	0.00240127	0.00220677	0.0017181	0.0013373	0.00127293	0.00114297	0.00103716	0.00105557
	539.5	0.00262813	0.00272447	0.0023003	0.00212287	0.00167187	0.0013092	0.00126743	0.00110473	0.00101231	0.00102529
	540	0.00254403	0.00263543	0.00221517	0.0020609	0.00161357	0.001262	0.00126667	0.00107938	0.00094528	0.000988463
	540.5	0.00245573	0.00253493	0.0021419	0.002	0.00157913	0.0012215	0.0012497	0.00105239	0.00088483	0.00095319
	541	0.0024011	0.00245833	0.0020692	0.0019391	0.00155677	0.001197	0.00118567	0.000995817	0.00086793	0.00091115
	541.5	0.00234027	0.0023774	0.00199587	0.00188197	0.00155463	0.0011557	0.0011189	0.000959853	0.00085749	0.000877853
	542	0.00229373	0.00232727	0.00193253	0.00185243	0.00152313	0.001145	0.00104347	0.000940313	0.000852677	0.000823403
	542.5	0.00224183	0.00226493	0.00189437	0.00182693	0.00147893	0.0010738	0.00100014	0.000917727	0.000779903	0.00078488
	543	0.0021797	0.00221547	0.0018856	0.00178463	0.00140223	0.00095954	0.000991287	0.000919567	0.00067439	0.000756207
	543.5	0.00212007	0.00217443	0.00184293	0.00172153	0.00131717	0.00088902	0.000960017	0.00092933	0.00062233	0.000761833
	544	0.00206953	0.0021433	0.0017877	0.00166593	0.0012501	0.00088881	0.000909433	0.00096034	0.000590337	0.000766983
	544.5	0.00203753	0.00209583	0.00175077	0.0016226	0.00119483	0.00089422	0.00084756	0.00093861	0.000630977	0.000750153
	545	0.00203313	0.00204793	0.00171633	0.00159417	0.0011881	0.00084707	0.000818983	0.00087565	0.000673783	0.00072251
	545.5	0.00200023	0.002006	0.00169627	0.00154237	0.0011716	0.00079434	0.000822647	0.00081413	0.000708647	0.000690083
	546	0.0019677	0.00198	0.00165003	0.0015016	0.00112063	0.00077196	0.000841313	0.000750207	0.000685493	0.000673773
	546.5	0.00192633	0.00196	0.00159417	0.00146963	0.0010668	0.000807	0.00082387	0.000714613	0.00061337	0.00065273
	547	0.00189097	0.00192733	0.00152623	0.00144307	0.00102723	0.00080502	0.000813257	0.000673317	0.00054806	0.000631503
	547.5	0.0018764	0.00189427	0.00145617	0.00141157	0.000991317	0.00077082	0.000776463	0.0006647	0.000506293	0.00062077
	548	0.00186803	0.00185273	0.00141683	0.00137123	0.00097165	0.00077767	0.00076306	0.00067853	0.000510343	0.000620327
	548.5	0.0018561	0.00181923	0.00141027	0.00132943	0.000947343	0.00081381	0.0007532	0.00068455	0.000481147	0.000613237
	549	0.00179933	0.0017723	0.00140407	0.00129073	0.000975247	0.00085207	0.000727573	0.00068767	0.000481507	0.000592913
	549.5	0.001717	0.00171263	0.0013832	0.00123837	0.00101447	0.00082572	0.00069992	0.00064431	0.000482513	0.000566497
	550	0.0016508	0.0016587	0.00132017	0.0011831	0.00103987	0.00077711	0.00066497	0.000597913	0.000495353	0.000552067
	550.5	0.00164617	0.0016243	0.00124503	0.00114737	0.0010543	0.0007083	0.000659627	0.000550163	0.00052738	0.000517787
	551	0.0016403	0.0015864	0.00116893	0.00111973	0.00102637	0.00063973	0.000692283	0.000531487	0.00053489	0.000492857
	551.5	0.00161487	0.00155653	0.00114573	0.00110463	0.000991497	0.00057834	0.000720827	0.00050989	0.00050465	0.00047939
	552	0.0015479	0.00150273	0.00114317	0.0010916	0.000942207	0.00053506	0.000733627	0.000495923	0.000468173	0.00048611
	552.5	0.00150703	0.0014755	0.00115027	0.00106906	0.00087419	0.00057003	0.0006863	0.00049599	0.000418197	0.00047762
	553	0.0014754	0.00143653	0.0011383	0.00105785	0.000812363	0.00057635	0.000638883	0.000516537	0.000398863	0.000449507
	553.5	0.00144303	0.00140693	0.00109515	0.00105617	0.000740427	0.00056482	0.000607423	0.000528867	0.00039512	0.000430613
	554	0.00141387	0.00136627	0.00105317	0.0010561	0.000704993	0.00057072	0.000595627	0.000528647	0.000382937	0.0004291
	554.5	0.00140553	0.00135123	0.00100028	0.00103157	0.000708377	0.00062985	0.000565687	0.000524743	0.000389313	0.00043468
	555	0.00142017	0.00136683	0.000981433	0.00100073	0.00069149	0.00068749	0.000528847	0.000511867	0.00040063	0.00043603
	555.5	0.00143437	0.0013916	0.000964083	0.000961723	0.000647967	0.00070394	0.000489877	0.000487493	0.000403677	0.000439753
	556	0.00141897	0.00138907	0.000943707	0.00094799	0.000592543	0.00070639	0.00050473	0.000469963	0.000381537	0.00045349
	556.5	0.00140273	0.00135597	0.000897227	0.00094005	0.000586367	0.00066736	0.000519317	0.000438193	0.000376283	0.000469907
	557	0.00139697	0.00132813	0.000856497	0.00093677	0.00063321	0.00060587	0.000526313	0.00039982	0.000353327	0.000463867
	557.5	0.00138697	0.0013386	0.00081105	0.0009245	0.000696727	0.00051669	0.000522223	0.000351423	0.000306393	0.000442023
	558	0.00138257	0.0013463	0.00080523	0.000900423	0.00072813	0.00046048	0.000498273	0.000357787	0.00027524	0.000407623
	558.5	0.00135593	0.0013475	0.0008102	0.00086326	0.00075289	0.0004706	0.000491657	0.00037415	0.00026194	0.000400957
	559	0.00130333	0.0012865	0.00081913	0.000833747	0.000753523	0.00047785	0.00047337	0.000395507	0.000275507	0.00037965
	559.5	0.00124937	0.0012177	0.000830583	0.00081593	0.00075072	0.0004857	0.000469077	0.000403247	0.000279393	0.00034465
	560	0.00120537	0.00115733	0.000813383	0.000813267	0.000702183	0.00050877	0.000471183	0.000404513	0.00024004	0.000318407
	560.5	0.0011699	0.0011169	0.000791107	0.00079885	0.000644307	0.00047301	0.00048039	0.00039165	0.00022322	0.00028826
	561	0.0011234	0.00107403	0.000755977	0.000759003	0.00059141	0.00046432	0.000468703	0.000351113	0.000214197	0.000293737
	561.5	0.00108823	0.00104273	0.00073905	0.000717747	0.000556773	0.00045928	0.000469433	0.000310427	0.000193993	0.00029639
	562	0.00109933	0.00105113	0.000734297	0.000700913	0.000529333	0.00049596	0.000445637	0.000272377	0.00018194	0.000306527
	562.5	0.00113813	0.00108533	0.000708027	0.000706703	0.00053442	0.00049398	0.000430923	0.000247497	0.000174137	0.000306613
	563	0.0011934	0.00113523	0.000664183	0.00069353	0.000568527	0.00045212	0.0003938	0.00024112	0.000193413	0.000291343
	563.5	0.0011898	0.00112133	0.000648583	0.00068946	0.000609633	0.00042256	0.000382587	0.00025596	0.000220203	0.000279067
	564	0.0011658	0.00110855	0.000665897	0.000673317	0.0006209	0.00044301	0.000379687	0.00027951	0.000247693	0.00028708
	564.5	0.00112477	0.00106992	0.00070331	0.000676117	0.000613037	0.00044747	0.000405467	0.000292907	0.000205847	0.000276877
	565	0.00109713	0.00104031	0.000693077	0.000656507	0.000569863	0.00042246	0.000411363	0.00029027	0.000155223	0.000255383
	565.5	0.00110253	0.00102296	0.000659503	0.00063935	0.000510103	0.00035497	0.000389517	0.000316657	8.77303e-05	0.000238467
	566	0.0010857	0.000993833	0.00063379	0.000615473	0.000465343	0.00034475	0.000347837	0.000316357	6.5267e-05	0.000227456
	566.5	0.0010781	0.000986717	0.000625087	0.000594953	0.000461263	0.00039007	0.000317293	0.000306957	4.56407e-05	0.000230833
	567	0.0010725	0.000987667	0.000606803	0.00057396	0.000493573	0.00045489	0.00031055	0.000275007	3.2958e-05	0.000230467
	567.5	0.00105075	0.000995983	0.000568943	0.000565343	0.000492017	0.00048009	0.000313563	0.000238067	7.7641e-05	0.000228317
	568	0.00102914	0.00098398	0.00053082	0.000578583	0.00046511	0.00044614	0.000279663	0.000239057	0.000115108	0.00021767
	568.5	0.00100437	0.00096335	0.00053178	0.000601063	0.00041667	0.0003833	0.000236933	0.00024709	0.00015676	0.000194947
	569	0.00100909	0.00096334	0.00054542	0.000601667	0.000369707	0.00037021	0.00020541	0.00025232	0.00016606	0.000174107
	569.5	0.00102396	0.0009834	0.00055534	0.000583527	0.000349733	0.00040905	0.000183427	0.000257213	0.00017643	0.00018797
	570	0.00102534	0.001005	0.000531957	0.000575943	0.00033364	0.00045777	0.000197847	0.00024357	0.00017869	0.000210645
	570.5	0.00102553	0.00101445	0.000501247	0.000582027	0.000331017	0.00044486	0.00023267	0.00025075	0.000145007	0.000221007
	571	0.00103699	0.00103537	0.00047807	0.00059418	0.000290347	0.0003855	0.00027331	0.00025553	7.17697e-05	0.000194559
	571.5	0.00101655	0.00102032	0.00046413	0.000590603	0.000287817	0.0003471	0.000299627	0.000233273	3.79187e-05	0.00015906
	572	0.000976583	0.00095312	0.000454837	0.000557723	0.000300873	0.00037905	0.0002972	0.000196767	3.0532e-05	0.000146744
	572.5	0.000903473	0.000867893	0.00044651	0.000524407	0.000329983	0.00040494	0.000280397	0.000158563	2.33457e-05	0.000146932
	573	0.00086101	0.000827027	0.00044019	0.000496653	0.00032061	0.00038647	0.00025479	0.00018442	1.61723e-05	0.000154563
	573.5	0.000810767	0.000804497	0.000449443	0.000489553	0.000333447	0.00037007	0.000228427	0.000240057	6.04333e-06	0.000141367
	574	0.000791843	0.000794377	0.00046619	0.000493457	0.000324573	0.00038836	0.000224397	0.00029102	1.98867e-05	0.00013825
	574.5	0.000814007	0.000812303	0.00050002	0.000494907	0.000315233	0.00041833	0.000219797	0.000260723	2.41863e-05	0.00016181
	575	0.000855607	0.00081736	0.00051141	0.00048826	0.000290507	0.00042681	0.000209903	0.000180457	1.91134e-05	0.000154367
	575.5	0.00087373	0.000799117	0.00049108	0.000478713	0.000240863	0.0003451	0.000163257	0.00010955	8.6387e-06	0.000143202
	576	0.000846757	0.000733063	0.000439657	0.000463817	0.000220483	0.00028136	0.000131581	6.5144e-05	4.04167e-06	0.000123204
	576.5	0.000800573	0.000688767	0.000377607	0.000455403	0.000225883	0.00023255	0.000137638	8.9119e-05	1.72073e-06	0.000136586
	577	0.00079494	0.000712897	0.000352327	0.000452313	0.000270193	0.00022244	0.000168204	0.000115869	1.55737e-05	0.000148205
	577.5	0.000810593	0.00075272	0.000374677	0.00045048	0.000309753	0.00025214	0.000206523	0.000151397	2.44083e-05	0.000168226
	578	0.000828963	0.000766107	0.000445087	0.00043424	0.000286907	0.00028969	0.000203287	0.000169547	3.673e-05	0.000160118
	578.5	0.000825497	0.00073087	0.000468123	0.000427997	0.00025127	0.00028903	0.000188497	0.000174013	3.91467e-05	0.000153089
	579	0.000792733	0.000681467	0.000447807	0.000427057	0.000249203	0.00022943	0.000198407	0.00015725	3.1713e-05	0.000126887
	579.5	0.000743717	0.00064327	0.00037168	0.000451863	0.00028362	0.00012885	0.000202267	0.000134202	1.56153e-05	0.00011066
	580	0.000747123	0.000657103	0.000337467	0.000459737	0.000305093	9.403e-05	0.000192457	9.71547e-05	0	0.000125309
	580.5	0.000771857	0.00068465	0.000351183	0.000463603	0.00031586	9.7573e-05	0.00015523	9.05397e-05	0	0.000134377
	581	0.00081471	0.000725333	0.000392123	0.00043952	0.000311697	0.00012154	0.000124784	0.000105325	0	0.00012637
	581.5	0.00079559	0.00070477	0.000418693	0.000401047	0.000315697	0.00018239	0.000107303	0.000160647	4.7533e-06	8.1421e-05
	582	0.000741427	0.00066956	0.000406003	0.000342093	0.000334823	0.00026004	9.5485e-05	0.00024237	2.74587e-05	6.6601e-05
	582.5	0.000704703	0.000638057	0.000352313	0.000293017	0.00030025	0.000327	0.000120137	0.00030356	2.8908e-05	8.47083e-05
	583	0.00070772	0.000653213	0.000305297	0.000279097	0.0002594	0.00031282	0.000140797	0.000284783	1.35285e-05	0.000140487
	583.5	0.000725437	0.000668137	0.0002844	0.000289207	0.00024254	0.00028244	0.000154597	0.00022991	5.559e-06	0.000172237
	584	0.00075016	0.000696167	0.0002784	0.000322107	0.000261403	0.00025775	0.000165807	0.000164951	1.08037e-06	0.0001782
	584.5	0.000756603	0.000705273	0.00026273	0.00034545	0.000287497	0.00023483	0.00017396	0.000159679	0	0.000178145
	585	0.000795853	0.000740113	0.00023863	0.000359567	0.000270983	0.00018535	0.000191363	0.000144771	1.35647e-05	0.000169561
	585.5	0.000791463	0.00073387	0.00025607	0.00036087	0.000276103	0.00016939	0.000179573	0.00014676	2.77507e-05	0.000190107
	586	0.000751797	0.000711	0.00028829	0.000363513	0.000281087	0.0001699	0.000173737	0.00011141	3.27573e-05	0.00018121
	586.5	0.000706883	0.000685157	0.000313563	0.000374217	0.00033163	0.00018102	0.00015707	8.82747e-05	2.70887e-06	0.00018771
	587	0.00070012	0.000672293	0.000304167	0.00038172	0.000360647	0.00010489	0.000132443	9.2884e-05	0	0.000171704
	587.5	0.000702313	0.00065388	0.000281887	0.000366963	0.00040648	7.6555e-05	0.000100274	0.000106637	0	0.000149431
	588	0.000713007	0.000657177	0.000268187	0.000332043	0.000384547	8.939e-05	7.55989e-05	0.000132771	0	0.000139685
	588.5	0.0007038	0.00063985	0.000237337	0.00029168	0.000310577	0.00015739	6.40563e-05	0.000123883	0	0.00012941
	589	0.000744593	0.00064829	0.000233863	0.000270583	0.00026237	0.0002049	5.5148e-05	0.000109033	1.5924e-06	0.00012707
	589.5	0.00073597	0.00060581	0.00024704	0.00028473	0.00024978	0.00022621	5.28903e-05	0.000133507	1.2369e-06	0.000107373
	590	0.000694503	0.000574683	0.000272677	0.000333373	0.00022336	0.00025887	7.4178e-05	0.000146497	0	7.9241e-05
	590.5	0.000644903	0.000558453	0.000257163	0.00037244	0.00016482	0.00023303	8.22757e-05	0.000124961	0	9.2415e-05
	591	0.00064185	0.00057728	0.000230807	0.00036952	0.000103862	0.0001506	7.77243e-05	0.0001089	0	0.00010736
	591.5	0.00067045	0.000602167	0.000186319	0.00034346	5.71217e-05	0.00012774	0.000101974	6.3086e-05	0	0.000126348
	592	0.000678033	0.000601243	0.000175247	0.000322733	7.3919e-05	0.00019997	0.000136333	8.53007e-05	4.81633e-06	0.000121367
	592.5	0.000649233	0.000582803	0.000186089	0.000342747	6.07966e-05	0.00031752	0.000163137	8.51093e-05	4.414e-06	0.000119215
	593	0.000621017	0.000574717	0.000191466	0.000361473	8.89233e-05	0.00036737	0.000153477	0.000106909	2.048e-07	0.000107417
	593.5	0.000624353	0.00060707	0.000168418	0.000353517	9.911e-05	0.00032754	0.000147553	0.000121944	0	9.30547e-05
	594	0.00063482	0.000620113	0.000126218	0.000317147	0.000131203	0.00030735	0.000140218	0.000152733	1.7386e-06	7.84893e-05
	594.5	0.000616083	0.000582173	0.000108366	0.00029315	0.000186043	0.00031048	0.000148893	0.00018378	1.83897e-05	8.16713e-05
	595	0.000577193	0.00050361	0.000127568	0.000307987	0.000217407	0.00034804	0.000143438	0.000205393	1.57553e-05	0.000117696
	595.5	0.000550963	0.00046475	0.000170984	0.000325103	0.00020357	0.00037975	0.000152433	0.00022749	1.22017e-05	0.000132011
	596	0.000545253	0.00048418	0.000191871	0.00030374	0.000147187	0.00043877	0.000138241	0.000198523	4.221e-06	0.000128969
	596.5	0.000557427	0.00053141	0.000202135	0.000270867	0.000135412	0.00043234	0.000106602	0.00017327	5.50083e-06	0.000113468
	597	0.000553837	0.000558313	0.00020136	0.00026638	0.00014992	0.00041985	7.64042e-05	0.000116406	1.21189e-05	0.000113846
	597.5	0.000540807	0.000542193	0.000236293	0.00026817	0.00016709	0.00035393	8.61833e-05	0.000105648	3.51e-06	0.000122589
	598	0.000523397	0.000520313	0.000255813	0.00029872	0.000133808	0.00027474	0.000101133	9.51107e-05	0	0.000148417
	598.5	0.00051962	0.000525327	0.000246803	0.000318753	0.000109652	0.00022104	0.000110033	0.000109168	0	0.0001959
	599	0.000545863	0.00053271	0.000191097	0.00034162	7.25627e-05	0.00013004	9.50367e-05	0.000108056	0	0.000207593
	599.5	0.000603623	0.000572587	0.000143255	0.000332827	3.83912e-05	0.00010117	8.51863e-05	0.000107619	0	0.00020068
	600	0.000597583	0.0005441	0.000154325	0.00030754	1.2963e-05	0.00015638	8.8514e-05	0.00012715	0	0.000175017
	600.5	0.000564103	0.000538757	0.000171386	0.000282747	2.63073e-05	0.00025066	0.000121378	0.000137487	0	0.000141247
	601	0.00052721	0.000523897	0.000157063	0.000278733	0.000107371	0.00037252	0.00012931	0.000162137	0	0.000131831
	601.5	0.000521277	0.0005268	8.62581e-05	0.000256	0.000153029	0.00037052	0.00014347	0.000150227	1.82673e-05	0.000122427
	602	0.000543843	0.000504177	7.73167e-05	0.000258347	0.000130965	0.00030798	0.000110689	0.000145732	3.14173e-05	0.000147167
	602.5	0.000565437	0.00050402	9.34257e-05	0.000240413	6.89765e-05	0.0002122	6.4477e-05	0.000125134	2.90347e-05	0.000140468
	603	0.000575307	0.000516007	0.000170536	0.00023316	5.10186e-05	0.00014579	5.46631e-05	8.5711e-05	9.21668e-06	0.000108394
	603.5	0.00060971	0.000548373	0.000228619	0.000204357	3.55133e-05	0.00011121	7.9753e-05	5.80543e-05	3.546e-07	7.67667e-05
	604	0.000588647	0.000505673	0.00027298	0.00019415	2.30895e-05	0.00010102	0.000140957	6.24593e-05	0	5.08914e-05
	604.5	0.00059453	0.000479983	0.00024733	0.00020068	4.1252e-05	0.00015214	0.000152673	0.000131982	0	5.68933e-05
	605	0.000560193	0.000464253	0.000190116	0.000242143	0.000122116	0.00027724	0.00018783	0.000202313	0	8.76337e-05
	605.5	0.000569187	0.000506253	0.000145837	0.000286977	0.000190497	0.00040223	0.00020138	0.000244363	0	0.000112517
	606	0.00058105	0.000538213	0.000124806	0.00030661	0.000164337	0.00038258	0.00023716	0.000229453	0	9.09272e-05
	606.5	0.00059244	0.000552357	0.000125611	0.00028011	9.0781e-05	0.00030509	0.000235637	0.000171817	0	6.77173e-05
	607	0.000588843	0.000561753	0.000129434	0.00021914	3.46289e-05	0.00024006	0.000223987	0.000111733	0	5.31407e-05
	607.5	0.00056134	0.000531457	0.000107076	0.000159687	3.466e-06	0.00021402	0.000165207	0.000103546	0	4.8331e-05
	608	0.000515527	0.000466677	8.10152e-05	0.000155407	0	0.00021361	0.000104479	9.62173e-05	0	4.96593e-05
	608.5	0.00049026	0.000427303	5.77467e-05	0.00018744	2.8707e-05	0.00018727	5.75107e-05	9.7449e-05	0	7.81947e-05
	609	0.000477173	0.000425077	4.11933e-05	0.000226967	0.000122752	0.00016781	7.9706e-05	7.8379e-05	0	8.0838e-05
	609.5	0.000520093	0.000495777	3.375e-05	0.000225727	0.00021924	0.00016668	0.000107225	0.000103876	0	8.334e-05
	610	0.000542913	0.000535877	3.92367e-05	0.000211743	0.000189913	0.00012574	8.28597e-05	0.000143582	2.8714e-06	0.00010861
	610.5	0.00056148	0.0005501	4.41667e-05	0.00018549	8.9985e-05	0.00016661	3.12111e-05	0.000171273	2.08523e-05	0.000128557
	611	0.00060034	0.000591857	6.23133e-05	0.000191773	2.34837e-05	0.00016109	2.37996e-05	0.000135425	3.12742e-05	0.000153236
	611.5	0.000629303	0.000614653	7.33967e-05	0.00018849	3.45444e-05	0.00022755	9.31913e-05	8.9227e-05	6.9615e-05	0.000120345
	612	0.000611353	0.000631187	8.05633e-05	0.000197837	8.94197e-05	0.00022842	0.000196917	2.06497e-05	5.86077e-05	7.7381e-05
	612.5	0.00054746	0.000571177	8.67067e-05	0.00018462	0.000157599	0.00028501	0.000206523	0	1.39043e-05	7.65173e-05
	613	0.000457473	0.0005016	9.72183e-05	0.00018337	0.000178987	0.00032367	0.000163203	3.66033e-06	0	7.14433e-05
	613.5	0.000414197	0.000471133	9.58807e-05	0.0001834	0.000188083	0.00037626	0.000136321	6.94517e-05	0	4.40987e-05
	614	0.00040365	0.000461503	6.99087e-05	0.00017546	0.000159807	0.00042353	0.000163289	0.000141806	0	1.72967e-05
	614.5	0.000407107	0.00044906	5.95797e-05	0.000181587	0.000131213	0.00043286	0.000180108	0.00017604	0	3.27061e-05
	615	0.000447057	0.00044727	5.04833e-05	0.000202863	0.000125294	0.00039379	0.000149737	0.000130588	5.32333e-07	7.64131e-05
	615.5	0.00045771	0.00041939	6.79333e-05	0.00024449	0.000147453	0.00028116	9.74233e-05	8.8961e-05	2.02023e-05	0.000118042
	616	0.000507917	0.000445537	8.55267e-05	0.000250443	0.000189597	0.00016707	3.74385e-05	7.75613e-05	5.94476e-05	0.000142488
	616.5	0.000569267	0.00046268	0.000113685	0.0002484	0.00017269	9.4199e-05	1.01356e-05	7.77103e-05	0.000109205	0.000156278
	617	0.000606873	0.000479947	0.000137475	0.00026446	0.000135637	4.2971e-05	0	8.94247e-05	0.000105934	0.00016215
	617.5	0.000572337	0.000464533	0.000141303	0.00027601	7.16803e-05	9.358e-05	5.64767e-06	7.3013e-05	7.7365e-05	0.000166349
	618	0.000551417	0.000465287	0.00013723	0.000284077	5.02572e-05	0.00013849	2.75161e-05	0.000115727	1.36118e-05	0.000152691
	618.5	0.00052868	0.000515563	0.000108921	0.000263413	7.13353e-05	0.00021225	9.9149e-05	0.000140572	0	0.000135248
	619	0.000548137	0.000567637	8.43196e-05	0.000249787	0.00010738	0.00028677	0.000124418	0.00013946	0	0.00011223
	619.5	0.000446733	0.00049572	6.76067e-05	0.000244833	0.000188547	0.00036239	0.000147713	9.9848e-05	0	0.000112943
	620	0.000375417	0.000395467	7.74433e-05	0.000240297	0.000235377	0.00039655	0.00016332	9.30793e-05	0	0.000132191
	620.5	0.000334467	0.00032111	8.95567e-05	0.000228863	0.000217053	0.00035552	0.000154967	0.000146277	0	0.000144392
	621	0.00035878	0.00035644	9.32235e-05	0.00023155	0.000159963	0.00021867	0.000210173	0.000162407	0	0.000134385
	621.5	0.0004298	0.000454427	0.000105184	0.000250077	0.00014605	0.00012073	0.000239943	0.0001079	0	0.000110902
	622	0.000477603	0.0005147	9.94938e-05	0.00027044	0.00016492	4.8936e-05	0.000281423	1.87158e-05	0	8.31087e-05
	622.5	0.000538107	0.000556063	9.313e-05	0.000266803	0.00019027	7.8481e-05	0.000246603	0	0	6.15877e-05
	623	0.000567507	0.00054688	6.87833e-05	0.00024021	0.000217683	0.00018662	0.00019611	4.448e-06	3.33567e-07	7.06724e-05
	623.5	0.000550633	0.000524343	5.94933e-05	0.000229307	0.000263407	0.00025531	0.000114511	2.62177e-05	4.88862e-06	9.83943e-05
	624	0.00054275	0.000543083	5.06533e-05	0.000262127	0.000301863	0.00029894	7.8621e-05	3.62403e-05	5.491e-06	0.00014274
	624.5	0.000535147	0.00055492	3.69467e-05	0.000294743	0.000262737	0.000249	6.639e-05	4.14453e-05	3.99233e-07	0.00016051
	625	0.0005774	0.00061027	2.9847e-05	0.000284727	0.000232433	0.00021578	0.00011487	5.5663e-05	0	0.000173209
	625.5	0.000566757	0.000595493	3.829e-05	0.00023516	0.000153747	0.0001884	0.000158293	7.8988e-05	1.46387e-06	0.000165679
	626	0.00055805	0.000596703	5.42067e-05	0.00017315	0.000103756	0.00022295	0.000182233	0.000106612	1.17987e-05	0.000100964
	626.5	0.000519367	0.00057759	6.37e-05	0.000175073	0.000116249	0.00028824	0.000256977	8.6711e-05	2.9275e-05	7.24027e-05
	627	0.000504703	0.00055011	6.06733e-05	0.00021119	0.000124017	0.00035553	0.000308193	7.6192e-05	6.46873e-05	7.70691e-05
	627.5	0.000453343	0.00047591	4.99e-05	0.00027691	0.00024012	0.00038524	0.000361067	3.96389e-05	6.4938e-05	0.000152753
	628	0.000453917	0.00045348	4.33267e-05	0.000294377	0.000271717	0.00050655	0.000348147	3.86913e-05	5.60287e-05	0.00019459
	628.5	0.000471173	0.000473117	5.39833e-05	0.00029054	0.000280757	0.00056428	0.000318303	5.53317e-05	4.1497e-05	0.000184804
	629	0.000442207	0.000464453	9.54597e-05	0.000268327	0.000253417	0.00062501	0.000290273	0.00016021	4.59263e-05	0.000180012
	629.5	0.00044643	0.00046314	0.0001304	0.000294443	0.00025427	0.00055362	0.000241483	0.000222677	8.41633e-05	0.000163847
	630	0.000485107	0.000486207	0.000148965	0.00031611	0.000336387	0.00047188	0.000202347	0.000199907	8.11667e-05	0.00016406
	630.5	0.000531777	0.000538177	0.000138339	0.000329093	0.00038778	0.00044259	0.000127882	0.000145247	1.84393e-05	0.000177873
	631	0.0005296	0.000557773	0.000164412	0.000338003	0.00038308	0.00047965	9.43528e-05	0.000129539	0	0.000186744
	631.5	0.000473957	0.000550463	0.000153617	0.0003598	0.000330757	0.00051828	0.000114904	0.000132207	0	0.000202857
	632	0.000450237	0.000527577	0.000141999	0.00041518	0.000296127	0.00051288	0.000132407	0.000121112	3.23497e-05	0.000176329
	632.5	0.000446627	0.000494453	0.000106716	0.000440147	0.000297893	0.00050153	0.000135131	0.000110406	7.8279e-05	0.000190481
	633	0.000532937	0.000522867	8.06267e-05	0.00047151	0.00031345	0.0004983	0.000137983	0.000150228	7.80053e-05	0.000188342
	633.5	0.000614187	0.00057122	6.406e-05	0.000480817	0.000357303	0.00055693	0.000177035	0.000211057	5.7594e-05	0.000224033
	634	0.000663807	0.00064334	7.3693e-05	0.00047334	0.00039848	0.00068311	0.0002577	0.00023035	5.51443e-05	0.000222197
	634.5	0.00060268	0.000617113	0.000137796	0.000429447	0.000390197	0.0008383	0.00033372	0.000213653	8.8914e-05	0.00024644
	635	0.000582417	0.000621813	0.0002309	0.000403877	0.000302983	0.00087943	0.00038084	0.00018183	0.000124986	0.00024022
	635.5	0.000590107	0.00064539	0.00032318	0.000455403	0.000196647	0.00080182	0.00040752	0.000175113	0.000185483	0.000289
	636	0.000634977	0.000707737	0.00032692	0.00051095	0.000168207	0.0006625	0.00040466	0.000207537	0.000183693	0.00030893
	636.5	0.000681947	0.00076995	0.000271626	0.000537253	0.000150535	0.00062951	0.00041486	0.000243633	0.000129319	0.00030326
	637	0.000705553	0.000794977	0.000199021	0.00051858	0.000181897	0.0006344	0.000433683	0.000308623	6.62183e-05	0.000314753
	637.5	0.000667833	0.00076276	0.000168593	0.000518067	0.000249407	0.00065677	0.000455913	0.000350713	8.1533e-05	0.000361067
	638	0.0006154	0.000737617	0.000172937	0.00051027	0.000379607	0.00070657	0.000531363	0.00037226	0.00013989	0.000446843
	638.5	0.000537797	0.000697453	0.000178659	0.00047955	0.000469227	0.00076907	0.00057918	0.000392313	0.00024437	0.000456547
	639	0.000531513	0.000722573	0.000172915	0.000500417	0.00051397	0.00086241	0.000553567	0.000400797	0.000319847	0.00044111
	639.5	0.00054685	0.000764557	0.000205609	0.000579037	0.00054072	0.00095003	0.000458413	0.000439073	0.00041222	0.00043096
	640	0.000601267	0.000817483	0.000232133	0.00067497	0.000619807	0.0010522	0.000401077	0.000431537	0.000456913	0.000481693
	640.5	0.00064672	0.000837523	0.000283947	0.000741263	0.000634253	0.0011455	0.000451143	0.00046441	0.00047567	0.000563867
	641	0.000678453	0.000805417	0.00030961	0.00077158	0.000713143	0.0012069	0.000554533	0.000463357	0.00054356	0.000626187
	641.5	0.00070437	0.000825527	0.000350867	0.00081393	0.000818643	0.0012608	0.000626273	0.00051906	0.00060321	0.00062863
	642	0.000669273	0.000801747	0.000382227	0.000828947	0.0009994	0.001275	0.00064908	0.000608347	0.000608453	0.000596387
	642.5	0.00066985	0.0008809	0.00038741	0.00081929	0.0010514	0.0012098	0.000688977	0.000716153	0.00053817	0.000533867
	643	0.000710897	0.000981007	0.000440053	0.000862103	0.00101098	0.0010806	0.00075217	0.00078874	0.000499953	0.000537473
	643.5	0.000853857	0.00116693	0.000512663	0.000960213	0.00097488	0.0010536	0.000818907	0.000828723	0.000583673	0.000557643
	644	0.000949663	0.00128327	0.00059185	0.00111073	0.00106783	0.0011984	0.000892803	0.00089226	0.000645157	0.000634693
	644.5	0.000997203	0.00134533	0.000628673	0.00120353	0.00119283	0.001332	0.00097475	0.00100418	0.000713033	0.000689893
	645	0.000960803	0.00136017	0.000694213	0.00130627	0.00130503	0.001445	0.00106832	0.00104061	0.000790143	0.000730883
	645.5	0.000971017	0.00140247	0.00076527	0.0014012	0.00134047	0.0015686	0.00114723	0.00103492	0.00089837	0.000735577
	646	0.000992383	0.00142963	0.0008403	0.00153347	0.00142483	0.0017466	0.00126337	0.00103649	0.00100908	0.000741313
	646.5	0.00104705	0.0014795	0.00094699	0.00161777	0.00151997	0.0019237	0.00138147	0.00112059	0.000978183	0.000789293
	647	0.00099867	0.0014397	0.00105286	0.00165427	0.00168143	0.0020945	0.00146107	0.0012089	0.000988697	0.000849733
	647.5	0.00090392	0.00135227	0.00119333	0.00170943	0.00182103	0.0022415	0.00145197	0.0012954	0.00101824	0.000899123
	648	0.00084646	0.00132217	0.00130753	0.0018082	0.00194523	0.0024012	0.00145473	0.0014061	0.0011188	0.00097181
	648.5	0.000943913	0.00146843	0.00141357	0.0020006	0.00207253	0.0024844	0.00150993	0.00149247	0.00127627	0.00103733
	649	0.00108907	0.0016706	0.00149447	0.00212283	0.00216447	0.0024841	0.00160783	0.0014904	0.00144537	0.00110669
	649.5	0.00127367	0.00193003	0.00151553	0.0022309	0.00225127	0.0025362	0.00170297	0.0014543	0.0016266	0.00115674
	650	0.00135763	0.0020768	0.001564	0.0023067	0.00231617	0.0026506	0.00177903	0.0015077	0.00174663	0.00124823
	650.5	0.00146553	0.00224817	0.00167597	0.00245803	0.00244767	0.0028422	0.0018736	0.0016666	0.0018614	0.0013569
	651	0.00154057	0.0023353	0.0017967	0.00259137	0.0025787	0.0028985	0.00199337	0.00187627	0.0019206	0.00138213
	651.5	0.0016182	0.0024431	0.00189057	0.00268873	0.00270843	0.0029655	0.00214837	0.0020164	0.0020078	0.00134453
	652	0.00163763	0.00251517	0.00196787	0.00281513	0.00279147	0.0030768	0.00231187	0.00214183	0.00209707	0.00131957
	652.5	0.00158973	0.0025406	0.0020673	0.00300207	0.00288283	0.0032524	0.00242047	0.00222597	0.00231313	0.0013739
	653	0.0015866	0.00256533	0.00215227	0.0032189	0.00300683	0.0034524	0.0024817	0.00231	0.00251213	0.00148027
	653.5	0.00161483	0.00260553	0.00222883	0.00337577	0.00322353	0.0036817	0.0025751	0.0024323	0.00270977	0.00160853
	654	0.0016927	0.00269313	0.00228177	0.00352667	0.0034339	0.0039498	0.00275953	0.00253677	0.00277687	0.00177483
	654.5	0.0017637	0.00279963	0.00240507	0.00364383	0.00363823	0.0041656	0.00294523	0.00269453	0.00280727	0.00192613
	655	0.00181467	0.00290067	0.00255463	0.00382673	0.00379887	0.0043387	0.00301163	0.00279167	0.00279657	0.00202167
	655.5	0.0019169	0.00304593	0.002765	0.0040127	0.0039816	0.0044588	0.00306177	0.00292543	0.0028754	0.00206807
	656	0.0020499	0.00323967	0.00294173	0.0042202	0.0040969	0.0045453	0.00312113	0.00302527	0.0030509	0.00216817
	656.5	0.00221287	0.00348143	0.00308177	0.00443897	0.00415957	0.0046156	0.0032526	0.0031628	0.0032303	0.00229697
	657	0.0022828	0.00367627	0.00320303	0.00466773	0.00430673	0.0047524	0.00345417	0.0033806	0.00337123	0.002397
	657.5	0.0023279	0.0038131	0.00335017	0.00489433	0.00464213	0.0049438	0.0037019	0.00364843	0.00351183	0.0024655
	658	0.00240243	0.00397347	0.0035618	0.00511063	0.00504997	0.0052089	0.00400173	0.0039378	0.0037408	0.00253563
	658.5	0.0025186	0.00415703	0.0037692	0.0053643	0.00540533	0.0054744	0.0042325	0.00411097	0.00400623	0.00266927
	659	0.00262147	0.0043501	0.00401617	0.00567337	0.00559833	0.0058153	0.0044735	0.00422817	0.00424507	0.0028375
	659.5	0.0026807	0.00449183	0.00423253	0.00598353	0.00581627	0.0061983	0.00469697	0.00439153	0.0044757	0.00301967
	660	0.00280637	0.00468583	0.00451877	0.00630147	0.00608953	0.0066946	0.0049499	0.00462503	0.0047827	0.0031845
	660.5	0.00296793	0.00489957	0.00478297	0.00667057	0.00642237	0.0071514	0.0051874	0.00491767	0.00507527	0.0032934
	661	0.00323617	0.00523177	0.0050503	0.00706297	0.00679273	0.0075898	0.00546893	0.0052082	0.00532447	0.00343517
	661.5	0.00342703	0.00557307	0.00536983	0.0075148	0.0071863	0.0080496	0.00577783	0.00549497	0.005612	0.00362583
	662	0.00362007	0.0059923	0.00572547	0.00800507	0.0076468	0.0085798	0.0061753	0.00580367	0.00596283	0.00384677
	662.5	0.00376307	0.00639057	0.0060983	0.00856107	0.00811137	0.0090633	0.0065335	0.0061674	0.00637687	0.00408917
	663	0.0040104	0.00681943	0.006463	0.00907807	0.00861203	0.0094475	0.00691343	0.0065243	0.00680847	0.00433213
	663.5	0.00431113	0.00729103	0.00683477	0.00959203	0.00920737	0.009908	0.00732873	0.0068598	0.00726393	0.00457167
	664	0.0046221	0.00776677	0.00733297	0.0101134	0.0098483	0.010519	0.00773883	0.00720667	0.0077489	0.00475873
	664.5	0.00491577	0.00823137	0.00776243	0.0107323	0.0104567	0.011219	0.00817223	0.0075724	0.00817737	0.0049504
	665	0.005212	0.00865403	0.00827323	0.011391	0.0110397	0.011815	0.00861203	0.00803717	0.0085413	0.00517233
	665.5	0.00558633	0.00918833	0.00874843	0.0121167	0.0116287	0.012294	0.00908217	0.0084369	0.00889453	0.005469
	666	0.00595823	0.0097817	0.009338	0.0127923	0.0123427	0.012773	0.00960333	0.00888003	0.00938267	0.005791
	666.5	0.00620413	0.0103097	0.009912	0.013498	0.0130913	0.013301	0.0101156	0.0093222	0.00997	0.0061811
	667	0.00631073	0.010713	0.0104632	0.0142153	0.0138693	0.014003	0.0107127	0.00977027	0.0105667	0.00653993
	667.5	0.00652427	0.011174	0.0110283	0.0150807	0.014606	0.014837	0.0113583	0.010232	0.0111833	0.00687827
	668	0.00691587	0.0118163	0.011607	0.0159577	0.0153567	0.015815	0.0119957	0.0107328	0.0117653	0.00721307
	668.5	0.0073979	0.012545	0.0122757	0.0168153	0.0161963	0.01676	0.0125557	0.0113652	0.012395	0.00756943
	669	0.0079257	0.0133587	0.013029	0.017674	0.0171	0.017597	0.013095	0.0120263	0.0129727	0.00793603
	669.5	0.00836317	0.0140473	0.0137877	0.018624	0.0181133	0.018344	0.01374	0.0126813	0.0135993	0.008249
	670	0.0087648	0.0147077	0.0145133	0.019607	0.0190573	0.019134	0.0145183	0.0133123	0.01418	0.00857257
	670.5	0.00911433	0.015363	0.0152263	0.0205683	0.0199297	0.020068	0.0153217	0.013934	0.0147573	0.00893783
	671	0.0096365	0.0162043	0.015948	0.0215077	0.0208273	0.021086	0.016102	0.0146	0.015419	0.00938537
	671.5	0.0101669	0.0170163	0.0166857	0.0224833	0.0218207	0.022061	0.0169157	0.0152303	0.016169	0.0098268
	672	0.0106719	0.0177903	0.01742	0.0235757	0.0229103	0.023011	0.017762	0.0158563	0.016922	0.0102843
	672.5	0.0111802	0.0186007	0.0181633	0.0246843	0.023899	0.023965	0.0185257	0.016541	0.0176727	0.0107447
	673	0.0117963	0.0195613	0.0189657	0.0258683	0.0249957	0.025036	0.0192613	0.0173113	0.018522	0.0112603
	673.5	0.0124197	0.0205123	0.0197977	0.0270547	0.0262067	0.02611	0.0201113	0.0181763	0.019603	0.0118413
	674	0.0129103	0.0213913	0.0207513	0.0282987	0.0274713	0.027323	0.021157	0.0189773	0.0206497	0.012447
	674.5	0.0133233	0.022255	0.021786	0.029662	0.028717	0.028684	0.0222053	0.019829	0.021592	0.0130383
	675	0.0137597	0.0232007	0.0228337	0.031097	0.0298267	0.030182	0.0231727	0.0207733	0.0224363	0.013591
	675.5	0.0144227	0.024293	0.023964	0.032648	0.0309933	0.031724	0.0241977	0.021803	0.0234037	0.0141463
	676	0.0151733	0.0254807	0.0250533	0.0341773	0.0322973	0.033172	0.025331	0.0228997	0.0245093	0.014787
	676.5	0.0159537	0.0266997	0.026187	0.0357397	0.0339157	0.034639	0.026502	0.023964	0.0257387	0.0154703
	677	0.0166807	0.0279563	0.027336	0.037355	0.0355413	0.036098	0.0276597	0.025013	0.0270047	0.016152
	677.5	0.017508	0.029237	0.0285397	0.0390043	0.0371323	0.037661	0.0288423	0.0260213	0.0281513	0.0168423
	678	0.018293	0.0304993	0.0298187	0.040527	0.038664	0.039274	0.0301003	0.0270707	0.0291583	0.0175417
	678.5	0.0189967	0.0316913	0.0310697	0.0419977	0.0404027	0.040907	0.0313267	0.028182	0.0302283	0.0182923
	679	0.0196233	0.0328567	0.0323367	0.0434653	0.0421267	0.042475	0.0325217	0.0293833	0.031419	0.019038
	679.5	0.0202037	0.0339813	0.0335037	0.0450873	0.0437907	0.043948	0.0337703	0.03053	0.032801	0.0198087
	680	0.0207963	0.0350747	0.034553	0.046655	0.0451453	0.045185	0.0349803	0.031601	0.0341227	0.0205473
	680.5	0.021369	0.0360763	0.0354253	0.0479653	0.0462257	0.046393	0.036104	0.0325503	0.035202	0.02124
	681	0.0219063	0.036982	0.0362173	0.0490903	0.0471693	0.047602	0.0370387	0.0335097	0.0361003	0.0218737
	681.5	0.022278	0.0376817	0.036935	0.0500527	0.0481053	0.048767	0.037946	0.0343913	0.03695	0.0224407
	682	0.022598	0.0382247	0.0374327	0.0509223	0.049016	0.049749	0.0387957	0.0350193	0.037732	0.02291
	682.5	0.0228467	0.038578	0.0378537	0.051539	0.0497127	0.050571	0.0394913	0.03556	0.038403	0.0233143
	683	0.0230073	0.0388487	0.038201	0.0520117	0.0502477	0.051373	0.0401	0.0361737	0.0389113	0.0236867
	683.5	0.0230047	0.0389157	0.038446	0.0523803	0.0507163	0.051961	0.0405507	0.036918	0.0393927	0.024126
	684	0.0229103	0.0389263	0.0385133	0.0526757	0.0512537	0.052212	0.040874	0.0374497	0.039744	0.0245773
	684.5	0.0227997	0.038847	0.038383	0.0527303	0.0515237	0.052275	0.0410357	0.037754	0.0400053	0.0249727
	685	0.022604	0.038595	0.038114	0.0524657	0.0513177	0.052342	0.041136	0.037846	0.0402123	0.0252067
	685.5	0.0223583	0.038269	0.0377643	0.0519917	0.050828	0.052667	0.0412083	0.037902	0.040382	0.02533
	686	0.021923	0.037767	0.0373413	0.0514227	0.050324	0.052834	0.0410457	0.03791	0.0404833	0.025419
	686.5	0.0213587	0.0371577	0.0367793	0.0507623	0.0497943	0.052775	0.04071	0.037907	0.040394	0.0254757
	687	0.020693	0.0363237	0.0360287	0.0499727	0.0491877	0.052394	0.0403263	0.0378113	0.0400227	0.025535
	687.5	0.0201793	0.0354477	0.0352193	0.0490027	0.0484223	0.051893	0.039932	0.037612	0.039569	0.0256163
	688	0.0197593	0.034594	0.0343857	0.047904	0.0475323	0.051317	0.0394793	0.0373413	0.0390993	0.025666
	688.5	0.019377	0.033766	0.033432	0.0466643	0.0465117	0.050558	0.0389153	0.0369693	0.0386417	0.025609
	689	0.0187973	0.0328823	0.0324153	0.0454263	0.045549	0.04971	0.038415	0.0364583	0.0380613	0.0253923
	689.5	0.0180353	0.0318937	0.031441	0.044177	0.0446217	0.048794	0.037802	0.035954	0.0374937	0.0251437
	690	0.017403	0.0309207	0.0305303	0.043021	0.0436403	0.047909	0.037057	0.0355057	0.0369313	0.0249273
	690.5	0.0168417	0.0298963	0.029568	0.041859	0.042637	0.047304	0.0363677	0.0350647	0.0364673	0.024811
	691	0.0163763	0.0290267	0.0286013	0.0407123	0.041755	0.046745	0.035856	0.0345883	0.0360093	0.0246893
	691.5	0.0156967	0.0279773	0.0276673	0.0395143	0.0409407	0.046127	0.035277	0.0341173	0.0353753	0.0246017
	692	0.0149987	0.0269463	0.0267997	0.0384247	0.0401063	0.045368	0.034544	0.0336103	0.0346733	0.0245113
	692.5	0.014375	0.0258923	0.0259677	0.0373533	0.0391053	0.044565	0.033855	0.0329447	0.033939	0.0243137
	693	0.0139127	0.0251203	0.0251847	0.03635	0.0381133	0.043891	0.0332343	0.032306	0.0333617	0.0240383
	693.5	0.013388	0.0243447	0.0244233	0.035381	0.0370903	0.043199	0.0326807	0.0316973	0.0327443	0.023797
	694	0.012728	0.0233793	0.023644	0.0344737	0.036137	0.042437	0.032061	0.0312387	0.0321827	0.023622
	694.5	0.012189	0.02249	0.022877	0.0335503	0.035215	0.041645	0.031557	0.0308493	0.0316993	0.0234877
	695	0.0118327	0.0217653	0.02219	0.0325983	0.0344753	0.040811	0.031103	0.030573	0.0313167	0.023316
	695.5	0.0115806	0.021186	0.021607	0.03166	0.033947	0.04005	0.0306177	0.0302147	0.030904	0.0231423
	696	0.0111315	0.020475	0.0210363	0.0308563	0.0334417	0.03933	0.0301647	0.029779	0.0304657	0.0229537
	696.5	0.0107418	0.019876	0.020511	0.0301103	0.0328213	0.038647	0.0296207	0.0292953	0.0301213	0.0227737
	697	0.0104045	0.0193473	0.0200277	0.0294007	0.0320773	0.037899	0.029186	0.028976	0.0296143	0.022621
	697.5	0.0102226	0.018873	0.0195583	0.0286023	0.031402	0.03717	0.0287287	0.0286913	0.0291023	0.0224957
	698	0.0100458	0.018399	0.0190403	0.027942	0.0308483	0.036642	0.0283943	0.0283907	0.0285643	0.022486
	698.5	0.0097994	0.017865	0.0184783	0.027401	0.0303423	0.036263	0.0279597	0.0279913	0.0282713	0.0224853
	699	0.00955227	0.0173407	0.0178847	0.0268967	0.0299413	0.03591	0.027487	0.0276613	0.0279073	0.0224927
	699.5	0.0092998	0.016909	0.0174187	0.0262753	0.0294903	0.035429	0.0270637	0.0274017	0.0275607	0.022398
	700	0.00906263	0.0165253	0.017046	0.0256983	0.028952	0.03497	0.0267847	0.0271763	0.0272373	0.0223063
	700.5	0.0087469	0.0161193	0.0167993	0.0252083	0.0283327	0.034571	0.0265333	0.026904	0.0269943	0.022189
	701	0.00842643	0.015645	0.016427	0.024811	0.0276963	0.034246	0.026237	0.0265747	0.026715	0.022001
	701.5	0.00817337	0.0152927	0.01604	0.024322	0.0270217	0.033798	0.025862	0.0261963	0.026335	0.0217763
	702	0.0079858	0.014957	0.0156827	0.023803	0.0263663	0.033433	0.0254913	0.0258627	0.0259923	0.021507
	702.5	0.00786853	0.0146737	0.0154203	0.023256	0.0257893	0.033018	0.0251037	0.0255667	0.025729	0.021357
	703	0.00778777	0.0144543	0.0152023	0.0227857	0.0253673	0.032668	0.024815	0.025301	0.025617	0.021341
	703.5	0.00767787	0.0142163	0.0148103	0.0223423	0.0250177	0.032006	0.024522	0.0250857	0.0254657	0.0213943
	704	0.00751683	0.0138643	0.014472	0.0219417	0.0247107	0.031451	0.0242353	0.024898	0.02528	0.0214193
	704.5	0.00736077	0.013537	0.014076	0.021596	0.0244227	0.030918	0.024011	0.0247267	0.0250033	0.0214583
	705	0.0071075	0.0131273	0.0138037	0.021247	0.0240793	0.030582	0.0238727	0.0244767	0.024684	0.021436
	705.5	0.00688973	0.0128007	0.013452	0.020839	0.0237773	0.030193	0.0236623	0.0242003	0.0241203	0.0213243
	706	0.00664833	0.0125097	0.0131697	0.02046	0.0234027	0.029897	0.023419	0.0239	0.02384	0.0211027
	706.5	0.00645633	0.0123107	0.012942	0.020166	0.023119	0.029648	0.023177	0.023629	0.023702	0.0208867
	707	0.0064111	0.012276	0.0128023	0.0199493	0.0227227	0.029544	0.0230353	0.0235087	0.0236703	0.0207003
	707.5	0.00649783	0.0123137	0.0126633	0.0197293	0.0225717	0.029564	0.02293	0.0234187	0.0235357	0.0206343
	708	0.00647777	0.012259	0.0124543	0.0195223	0.0223483	0.029468	0.0228293	0.023233	0.0234927	0.0206317
	708.5	0.00628863	0.0120883	0.012281	0.019309	0.0220703	0.029081	0.0226493	0.0230513	0.0234687	0.02066
	709	0.00614987	0.0118987	0.012226	0.019142	0.0217383	0.028621	0.0224203	0.022951	0.0233993	0.020715
	709.5	0.00632483	0.0119493	0.012162	0.0188907	0.021453	0.028344	0.02223	0.0229103	0.0233123	0.02077
	710	0.00647533	0.0119537	0.0120657	0.018622	0.021293	0.0282	0.0220467	0.0227507	0.023262	0.020769
	710.5	0.00651167	0.011926	0.0119613	0.0184767	0.0211523	0.028007	0.0218673	0.0225223	0.0231233	0.0206517
	711	0.0063099	0.01173	0.011876	0.0183987	0.0211657	0.027849	0.0216773	0.0223437	0.0229657	0.0205277
	711.5	0.00616767	0.0115297	0.0117887	0.0183847	0.0210707	0.027918	0.0215933	0.0223417	0.0229317	0.020471
	712	0.00613637	0.0113983	0.011665	0.0182613	0.0209427	0.028042	0.021618	0.02235	0.0230637	0.0205347
	712.5	0.00613643	0.011397	0.0116367	0.0181857	0.0207757	0.028001	0.0215623	0.0222687	0.023119	0.020639
	713	0.00601477	0.0113217	0.0115573	0.018084	0.0207177	0.027726	0.0213603	0.0222093	0.023044	0.0207147
	713.5	0.0058162	0.011067	0.0114843	0.0179543	0.0205177	0.027507	0.0211577	0.0221473	0.0229467	0.0206727
	714	0.0056553	0.0107707	0.01137	0.0178277	0.0204077	0.027453	0.0212237	0.0221393	0.0229507	0.0205703
	714.5	0.00552727	0.0105413	0.0112787	0.017818	0.0203243	0.027711	0.0213593	0.0220853	0.0228533	0.020515
	715	0.00548	0.0104733	0.0112073	0.01784	0.0202467	0.02797	0.0213223	0.0221163	0.0225797	0.0205523
	715.5	0.00549297	0.010449	0.0112367	0.017723	0.020185	0.027964	0.021135	0.0220757	0.0226253	0.0206707
	716	0.00560963	0.0104623	0.011254	0.017536	0.0200917	0.027508	0.020915	0.0219553	0.022763	0.02078
	716.5	0.005655	0.010445	0.0112657	0.017416	0.0201047	0.027128	0.020795	0.0218793	0.022979	0.020873
	717	0.00574693	0.0106077	0.011274	0.0174463	0.02011	0.027087	0.020822	0.021876	0.0228733	0.020897
	717.5	0.005713	0.010653	0.0112647	0.0174503	0.0200733	0.027077	0.020962	0.0219913	0.0228283	0.020851
	718	0.00568607	0.0106607	0.011217	0.0174043	0.0199507	0.02717	0.0210973	0.0221653	0.0228113	0.0208453
	718.5	0.0056312	0.010566	0.0112577	0.017359	0.0199423	0.027283	0.0211417	0.022277	0.0227977	0.020902
	719	0.0056542	0.0106517	0.0113537	0.0173283	0.020295	0.027437	0.0210783	0.0222887	0.0227727	0.0210267
	719.5	0.0055938	0.0106457	0.011245	0.0173093	0.020674	0.026967	0.0210197	0.0222633	0.0226747	0.0210427
	720	0.00558213	0.010686	0.0109527	0.0173603	0.0207673	0.02679	0.0209263	0.0223143	0.022722	0.0209427
	720.5	0.00557813	0.010708	0.010674	0.0173817	0.0205653	0.026922	0.020911	0.0222957	0.0227513	0.0208683
	721	0.00559137	0.0107503	0.010729	0.0174137	0.0201093	0.027239	0.021034	0.0222577	0.0227547	0.0209123
	721.5	0.0055947	0.010694	0.0109377	0.0173643	0.0198863	0.027275	0.0211657	0.022052	0.022738	0.0210407
	722	0.00559087	0.010569	0.0111883	0.017386	0.0198943	0.027265	0.0211833	0.0218473	0.0228323	0.0210377
	722.5	0.00553473	0.010414	0.0112217	0.0174297	0.0201337	0.027489	0.0211293	0.0217907	0.023096	0.021096
	723	0.00550063	0.0103977	0.0111507	0.0174617	0.020201	0.027624	0.0211237	0.0219743	0.0232403	0.0212257
	723.5	0.0054757	0.010492	0.0109227	0.0174583	0.020212	0.027543	0.0211233	0.0221373	0.0231817	0.021263
	724	0.0055221	0.0106297	0.0107877	0.0173987	0.020201	0.027231	0.0210913	0.0222533	0.0231027	0.0211497
	724.5	0.0054888	0.010616	0.0107313	0.0173907	0.0202397	0.02709	0.0210773	0.0223623	0.0230843	0.0210707
	725	0.00547363	0.0105897	0.0108077	0.0174907	0.0202737	0.027189	0.0210427	0.022445	0.023068	0.0211363
	725.5	0.00547953	0.0105723	0.010956	0.0175777	0.0204063	0.027428	0.021119	0.0224813	0.023052	0.0212727
	726	0.00568313	0.0107427	0.011079	0.0176247	0.0205237	0.027592	0.0213727	0.0225203	0.023133	0.0214017
	726.5	0.00573627	0.010743	0.01096	0.0175663	0.020576	0.027734	0.0216823	0.022562	0.0232867	0.0214643
	727	0.00569837	0.0106847	0.01084	0.0175233	0.0207197	0.027549	0.0218717	0.0226887	0.0234363	0.0214293
	727.5	0.00573167	0.0107023	0.0107593	0.0174323	0.0208063	0.027653	0.0218527	0.0228647	0.0236203	0.0214633
	728	0.00582103	0.0108927	0.0108453	0.01747	0.0207177	0.027751	0.0218057	0.0229913	0.0238703	0.021611
	728.5	0.00582007	0.010943	0.0108803	0.0175253	0.0206463	0.027806	0.0218617	0.0229323	0.0238963	0.0218077
	729	0.00568243	0.010815	0.0109847	0.0176537	0.0206403	0.027584	0.0218653	0.0228583	0.023779	0.0219413
	729.5	0.00568743	0.0107937	0.0110677	0.0178197	0.0206857	0.027516	0.021799	0.0228777	0.023682	0.02202
	730	0.00571883	0.01089	0.011173	0.017894	0.0206347	0.027583	0.0217067	0.023004	0.0238713	0.0221677
	730.5	0.0057804	0.0109767	0.011268	0.017906	0.020731	0.027676	0.0216313	0.0230923	0.023949	0.022142
	731	0.0056473	0.0108133	0.011283	0.0178533	0.020786	0.027944	0.0216727	0.0231587	0.023838	0.0220663
	731.5	0.00552937	0.0107	0.0112163	0.0177847	0.0207733	0.028348	0.0216807	0.0231013	0.023652	0.0220443
	732	0.00540497	0.010718	0.0111717	0.017637	0.020761	0.028521	0.0217643	0.0232027	0.0237003	0.022197
	732.5	0.00550693	0.0108903	0.011114	0.017531	0.020855	0.028436	0.0219523	0.023239	0.0239613	0.0223773
	733	0.0056715	0.0109693	0.0110923	0.0176047	0.0211273	0.028283	0.022213	0.0233247	0.0241147	0.022404
	733.5	0.00566657	0.010861	0.0110403	0.0177587	0.021311	0.028247	0.0222353	0.0233397	0.024342	0.0224267
	734	0.00558457	0.0107643	0.0110213	0.0178863	0.0213787	0.028306	0.0220047	0.023294	0.024445	0.0224197
	734.5	0.00542407	0.0106027	0.0110093	0.0178553	0.0214457	0.028284	0.0219007	0.023327	0.0243997	0.0223967
	735	0.0055468	0.0107553	0.0111947	0.0178177	0.0213797	0.028352	0.022004	0.0234813	0.024379	0.0224153
	735.5	0.0054931	0.010764	0.0112607	0.017749	0.021182	0.02866	0.0221307	0.0236157	0.0242573	0.022547
	736	0.0054687	0.010851	0.0112563	0.0177643	0.0207963	0.028836	0.0221453	0.0234787	0.024292	0.0226613
	736.5	0.00547843	0.010932	0.0111443	0.017789	0.020681	0.028673	0.022113	0.0231927	0.024126	0.022748
	737	0.00588397	0.01131	0.011115	0.0179017	0.0206003	0.028395	0.0220347	0.0229583	0.0239863	0.022801
	737.5	0.0060414	0.0113023	0.0111737	0.0179603	0.0206193	0.028157	0.02198	0.0228133	0.0238363	0.0228327
	738	0.0060583	0.0111593	0.0112427	0.017975	0.0207303	0.028297	0.0219197	0.02287	0.0237177	0.0227047
	738.5	0.00578297	0.010902	0.0112743	0.017941	0.020818	0.028365	0.0218323	0.023009	0.023787	0.0225007
	739	0.00562953	0.0107843	0.0110913	0.0179707	0.0210247	0.028235	0.0217013	0.023141	0.0240783	0.0223353
	739.5	0.00563867	0.0107127	0.0108353	0.0179367	0.021278	0.027908	0.021746	0.0230983	0.024225	0.022273
	740	0.0057263	0.0106963	0.0106087	0.017854	0.0211007	0.027796	0.0217127	0.0230107	0.0241033	0.02213
	740.5	0.00564843	0.0107127	0.0105623	0.017672	0.0205713	0.027969	0.0217993	0.0229667	0.0237403	0.0220743
	741	0.00566523	0.0108607	0.0106183	0.0176053	0.020314	0.028057	0.021815	0.0230447	0.0233713	0.0220693
	741.5	0.0056185	0.0108783	0.010646	0.01747	0.020227	0.028049	0.0217507	0.0229537	0.0230513	0.0220347
	742	0.00534937	0.01052	0.0107423	0.017315	0.0200787	0.027915	0.0214957	0.0228683	0.022724	0.0217163
	742.5	0.00500293	0.0101285	0.0108677	0.0171913	0.0199827	0.027722	0.0212787	0.022686	0.022652	0.0213433
	743	0.0050538	0.0100605	0.010811	0.017196	0.0199567	0.02762	0.021118	0.0225093	0.022466	0.021104
	743.5	0.0052716	0.010172	0.0105587	0.0172277	0.019744	0.027381	0.0210153	0.022203	0.0225063	0.02101
	744	0.00530077	0.0101115	0.0102789	0.0171337	0.019331	0.027097	0.020833	0.0218173	0.0225673	0.0210157
	744.5	0.0050477	0.00994313	0.0102518	0.0168737	0.0192817	0.026769	0.0206533	0.021529	0.0225507	0.0210387
	745	0.00465393	0.009601	0.0102836	0.0165363	0.019416	0.026356	0.0204497	0.021144	0.02219	0.0209247
	745.5	0.00446613	0.00948177	0.0101985	0.0162727	0.0194053	0.025903	0.0203897	0.021018	0.02162	0.020573
	746	0.00453793	0.00955873	0.0100122	0.0161007	0.0192067	0.025565	0.020248	0.0209033	0.0212457	0.0201743
	746.5	0.00480993	0.0097653	0.00978407	0.0158677	0.018897	0.025592	0.0199427	0.0207923	0.021177	0.0200133
	747	0.00507727	0.00987767	0.00948027	0.0155633	0.0186383	0.025584	0.019266	0.020439	0.021328	0.019895
	747.5	0.005053	0.00974883	0.00915743	0.015354	0.0182317	0.025134	0.019158	0.0200333	0.0211897	0.0196793
	748	0.00463747	0.00930123	0.0089705	0.0151723	0.01766	0.024456	0.0190663	0.0195803	0.0207203	0.0192713
	748.5	0.00434867	0.008976	0.00895263	0.0150013	0.01717	0.02416	0.018996	0.019325	0.0203043	0.0189573
	749	0.0044749	0.00897663	0.00908533	0.0146657	0.017009	0.023788	0.0184497	0.0189787	0.0200563	0.0187713
	749.5	0.00480323	0.0091306	0.00905403	0.0144447	0.0167617	0.023422	0.0179297	0.01855	0.0196383	0.0186133
	750	0.005013	0.0091273	0.00881633	0.0143327	0.0163617	0.023031	0.0174063	0.018173	0.019068	0.018343
	750.5	0.00495213	0.00893083	0.0083986	0.0141733	0.0160177	0.022955	0.0170523	0.017874	0.018584	0.0180213
	751	0.0046696	0.00848787	0.00809943	0.013934	0.01593	0.022613	0.0168607	0.017691	0.018347	0.017664
	751.5	0.00436837	0.00818077	0.007923	0.013571	0.0159077	0.022135	0.0167983	0.0173217	0.01805	0.0173
	752	0.0043844	0.008152	0.007752	0.0132967	0.015749	0.021525	0.0167673	0.0170343	0.0177723	0.016874
	752.5	0.00454853	0.00824693	0.00753543	0.012928	0.0154563	0.021042	0.0166347	0.016813	0.017401	0.016602
	753	0.00448733	0.00809247	0.00726547	0.0127213	0.0149983	0.020583	0.016311	0.0167583	0.0170427	0.0162637
	753.5	0.00404597	0.00767653	0.00700573	0.0124467	0.014542	0.019771	0.0158503	0.0164723	0.0164183	0.0158263
	754	0.003666	0.00736223	0.006825	0.0123157	0.0141433	0.019192	0.0152953	0.0160033	0.0157133	0.0152753
	754.5	0.0034757	0.0072658	0.00663207	0.0121063	0.0139337	0.018931	0.014862	0.01562	0.015279	0.0149477
	755	0.0035983	0.00746217	0.006634	0.0118813	0.0137737	0.018961	0.0145793	0.015382	0.0151073	0.0147417
	755.5	0.00371273	0.0074708	0.0066999	0.0115653	0.0135493	0.018653	0.0143923	0.0151287	0.0152977	0.0146267
	756	0.00388177	0.00726107	0.00653793	0.011317	0.0131933	0.017995	0.013979	0.0146727	0.015259	0.014331
	756.5	0.0038191	0.00689977	0.0061321	0.011105	0.0129433	0.017268	0.0135513	0.0144057	0.0150097	0.0141213
	757	0.00374187	0.0066839	0.0060465	0.0109067	0.012535	0.017018	0.013358	0.014206	0.0145607	0.0138523
	757.5	0.00345597	0.0064027	0.00604663	0.010583	0.0120187	0.017088	0.013224	0.014061	0.014184	0.013579
	758	0.0032383	0.0060979	0.00596717	0.0102439	0.0117003	0.016846	0.0126747	0.01369	0.0139913	0.0132213
	758.5	0.003055	0.005892	0.00576467	0.00999753	0.011679	0.016431	0.0123137	0.013337	0.0136473	0.0128813
	759	0.0029342	0.00586417	0.00588063	0.00976323	0.0115847	0.016115	0.0121347	0.0131097	0.0130667	0.0126203
	759.5	0.00293747	0.0059646	0.00592293	0.00954137	0.0113217	0.015907	0.011986	0.0129407	0.0125383	0.0123953
	760	0.00281217	0.00579947	0.00592777	0.00933763	0.0108133	0.015784	0.011648	0.0127623	0.0121437	0.0120837
	760.5	0.0026544	0.00554247	0.00560417	0.0091579	0.010471	0.015533	0.011392	0.012433	0.011861	0.0116923
	761	0.00252707	0.00541863	0.00530223	0.0090711	0.010631	0.014969	0.0113133	0.011967	0.011729	0.0112933
	761.5	0.00269033	0.0054683	0.00500433	0.00908863	0.010977	0.01432	0.0111687	0.0114303	0.0115453	0.011145
	762	0.0029217	0.00554137	0.00478597	0.0090647	0.010749	0.013738	0.0110163	0.0112767	0.011484	0.0109893
	762.5	0.00320927	0.0057179	0.004576	0.00881983	0.0102081	0.013379	0.0106472	0.011149	0.0112103	0.0108287
	763	0.0033065	0.00579693	0.00444083	0.00859983	0.00984173	0.013145	0.0102565	0.0109067	0.0110753	0.0105854
	763.5	0.0032731	0.0057339	0.00442343	0.0084753	0.0096926	0.013192	0.0098116	0.0105413	0.0109463	0.0104937
	764	0.0030468	0.00541697	0.004521	0.00813733	0.0095677	0.012937	0.00947003	0.010296	0.0106737	0.0102047
	764.5	0.0028175	0.00512347	0.00452597	0.00775657	0.00945113	0.012604	0.00913493	0.0100633	0.0101215	0.00991073
	765	0.00286547	0.0050814	0.00428813	0.0074716	0.00920837	0.012309	0.00898077	0.00981483	0.00978	0.0094249
	765.5	0.0028861	0.00499187	0.00391073	0.00732837	0.00893143	0.012158	0.00857453	0.0096443	0.00958753	0.0091571
	766	0.00265947	0.00467273	0.00381837	0.00685853	0.00839747	0.011556	0.00834893	0.00932727	0.0092745	0.00891377
	766.5	0.00241463	0.00444793	0.00368473	0.0064917	0.007963	0.010968	0.00804817	0.009117	0.00887267	0.00879547
	767	0.00225853	0.00441667	0.0034453	0.00631453	0.00758027	0.010328	0.00803807	0.00883263	0.00848683	0.00865357
	767.5	0.00221737	0.00441343	0.00324923	0.00630643	0.00726553	0.010331	0.00815637	0.0085372	0.00801903	0.0084349
	768	0.00209717	0.00414813	0.0031955	0.0062061	0.0069786	0.010509	0.0081123	0.00815507	0.00778207	0.0081387
	768.5	0.00204207	0.00396367	0.00302817	0.0060508	0.00674563	0.010771	0.007982	0.0079982	0.00762683	0.00776517
	769	0.0022387	0.00406513	0.0028004	0.00590537	0.006466	0.010574	0.00767877	0.0079362	0.00752227	0.0075287
	769.5	0.00237157	0.00408273	0.0027477	0.00560437	0.00617957	0.010518	0.00745727	0.00780453	0.00723117	0.00737587
	770	0.00240697	0.0039972	0.0028022	0.0053092	0.00612887	0.010446	0.00724773	0.00770107	0.00725287	0.00723737
	770.5	0.0023116	0.00388807	0.0028617	0.0051606	0.0060525	0.010024	0.00675763	0.0074438	0.00725137	0.0069731
	771	0.0021861	0.00382157	0.00293937	0.00511227	0.0060067	0.0093521	0.0062566	0.0071108	0.007129	0.00674237
	771.5	0.00201093	0.00368407	0.0028952	0.0051132	0.00586023	0.0085289	0.0060405	0.0067094	0.00689303	0.00660027
	772	0.002037	0.0035817	0.00280973	0.00504623	0.0057551	0.0079543	0.00599397	0.00639243	0.00673017	0.0064346
	772.5	0.00179167	0.00322073	0.00279263	0.004954	0.00542577	0.0077126	0.0059053	0.00627373	0.00637497	0.006245
	773	0.00148547	0.00280273	0.00245137	0.00482293	0.0053107	0.0078367	0.00535837	0.00626473	0.0056366	0.00612807
	773.5	0.00140047	0.00265903	0.00199563	0.00466443	0.0052214	0.0081318	0.00495073	0.0062968	0.0051019	0.0060313
	774	0.0015516	0.00276333	0.0018293	0.0043914	0.00516723	0.0079871	0.00476203	0.00604307	0.00497147	0.00584903
	774.5	0.00167063	0.00292597	0.00171637	0.0042153	0.00505393	0.007454	0.00496913	0.00571983	0.0050365	0.00559127
	775	0.00168103	0.00297967	0.00160363	0.00419093	0.00511443	0.0069131	0.0052562	0.00534507	0.00513433	0.00530743
	775.5	0.00149717	0.00277147	0.0015337	0.00432167	0.00498473	0.0067267	0.0054979	0.00524127	0.00483593	0.00504353
	776	0.0014318	0.0025216	0.0015467	0.00422087	0.0050627	0.0066657	0.00555793	0.00532403	0.00468327	0.00499303
	776.5	0.00167467	0.0027348	0.00160563	0.004103	0.00494137	0.0066499	0.005308	0.0052616	0.00453723	0.0049714
	777	0.002099	0.00313983	0.0016451	0.0040124	0.00439363	0.0066887	0.00498207	0.0050978	0.00454837	0.0048913
	777.5	0.0019278	0.0029786	0.00168297	0.00395957	0.00380577	0.0066102	0.0047493	0.00509217	0.00439017	0.00477377
	778	0.00142087	0.00243083	0.0014735	0.0038571	0.0038997	0.0064173	0.00438513	0.00507463	0.00408063	0.00481543
	778.5	0.00101575	0.00200103	0.00134176	0.00364087	0.00420017	0.0062012	0.00402283	0.00497427	0.00389067	0.00476953
	779	0.00092493	0.00188687	0.00123321	0.0033972	0.00429203	0.0060547	0.0038008	0.0046655	0.00390247	0.0047174
	779.5	0.00095036	0.00196227	0.00136227	0.0032855	0.0040682	0.006103	0.00407197	0.00437	0.00389783	0.0044173
	780	0.0010187	0.00206283	0.00128953	0.00318617	0.00393387	0.0059489	0.0042466	0.00415197	0.0037757	0.00412307
	780.5	0.000946583	0.0019871	0.00110184	0.00309147	0.00376283	0.0056006	0.00420997	0.00403797	0.00358243	0.00375447
	781	0.000874417	0.00202953	0.00082293	0.0028609	0.00364277	0.0051734	0.00408433	0.0039984	0.00364593	0.0035789
	781.5	0.000976373	0.00213393	0.000804943	0.00274543	0.00336917	0.0052437	0.0040914	0.00412583	0.00352773	0.00351037
	782	0.00167007	0.0027281	0.000689943	0.00273407	0.00316047	0.0055087	0.00389927	0.00395707	0.00350163	0.00371897
	782.5	0.00206317	0.0031263	0.00067476	0.00288143	0.00314137	0.0055919	0.00345213	0.0035926	0.00345353	0.00390027
	783	0.00197373	0.00300413	0.000564796	0.00295913	0.00343063	0.0053008	0.003227	0.00337413	0.00352553	0.00393123
	783.5	0.001593	0.00239737	0.00046845	0.002866	0.0034042	0.005487	0.00315107	0.00364007	0.0031015	0.00383933
	784	0.00133116	0.00211027	0.000514629	0.00269267	0.0027891	0.0056857	0.003399	0.0037949	0.0027281	0.00380093
	784.5	0.00111445	0.0023129	0.0007844	0.00257393	0.0025357	0.0056008	0.0035367	0.00361087	0.00251933	0.0037339
	785	0.00105932	0.0024574	0.00124927	0.00251863	0.0025002	0.0050361	0.00360597	0.00371077	0.0029353	0.00372933
	785.5	0.00108726	0.00226807	0.00122385	0.0024546	0.00270407	0.004771	0.0032235	0.00363723	0.00319413	0.00370707
	786	0.00112262	0.0019255	0.00107363	0.00241797	0.00297763	0.00473	0.00298237	0.0034409	0.00316077	0.0036073
	786.5	0.00112476	0.00184653	0.00100842	0.0025026	0.00343993	0.0047762	0.00311517	0.00339157	0.00285887	0.00343623
	787	0.00108983	0.00189327	0.00111949	0.00261663	0.00346917	0.0046739	0.00336783	0.00357293	0.00273337	0.00315993
	787.5	0.0013494	0.00204027	0.0012173	0.0027115	0.0031928	0.0045856	0.00328003	0.00368027	0.0027973	0.0029893
	788	0.0016712	0.00220953	0.0011116	0.00270643	0.00299307	0.0044816	0.00323257	0.00374597	0.0029687	0.00307077
	788.5	0.001552	0.00230673	0.00088951	0.0026601	0.00272807	0.0043012	0.0031965	0.0039435	0.0031718	0.00327597
	789	0.00110215	0.00204363	0.000753443	0.00252477	0.00239293	0.0043153	0.00328373	0.00384853	0.00294263	0.0033704
	789.5	0.000883527	0.00180673	0.00090712	0.00237253	0.00248783	0.0040469	0.00300657	0.0033235	0.0027571	0.00337387
	790	0.000861897	0.00180387	0.000909463	0.0023428	0.00300057	0.0040251	0.00277727	0.00293273	0.00228927	0.00299517
	790.5	0.00086507	0.00203243	0.000772417	0.0023691	0.00335863	0.0039653	0.00295897	0.00281483	0.00238063	0.00286947
	791	0.00087433	0.00199487	0.000621703	0.00239797	0.0032935	0.0037032	0.0032394	0.002864	0.00248327	0.00282277
	791.5	0.00108694	0.00192553	0.000465889	0.00237817	0.00314863	0.0034262	0.00317187	0.0029703	0.00259687	0.00299153
	792	0.00112104	0.0017332	0.000385233	0.00231123	0.00297217	0.0035555	0.00268813	0.00318583	0.0024282	0.0032838
	792.5	0.0011248	0.00186477	0.000339233	0.00225693	0.00299303	0.0038823	0.00270497	0.00333493	0.00230527	0.00339603
	793	0.00129827	0.00201967	0.000345967	0.0021026	0.00285467	0.0039695	0.00306747	0.00327737	0.0021959	0.0031955
	793.5	0.00167437	0.00216313	0.000356567	0.0021061	0.0024184	0.0042898	0.00297157	0.00311773	0.002275	0.00275167
	794	0.00157943	0.00198307	0.0003907	0.00199303	0.00211273	0.0048958	0.00270403	0.0030254	0.00236293	0.00264287
	794.5	0.00117394	0.00181083	0.0003926	0.00209023	0.00230403	0.0052724	0.0028035	0.0029186	0.00237987	0.0027163
	795	0.00104335	0.00177323	0.0003387	0.0019453	0.0020264	0.0054109	0.00285807	0.00307913	0.00235273	0.00294233
	795.5	0.00113205	0.0017305	0.000313113	0.00195127	0.00171087	0.0050137	0.00261933	0.00305527	0.00217553	0.0031444
	796	0.00131758	0.0018474	0.000364329	0.0018111	0.00176393	0.0042877	0.00225673	0.00264297	0.0020731	0.00317513
	796.5	0.00144027	0.00204153	0.000420445	0.00182963	0.00203733	0.0039452	0.00190917	0.00224877	0.0021096	0.00290607
	797	0.00125073	0.00187053	0.000393267	0.00176263	0.00224767	0.004016	0.00206897	0.00218327	0.0023371	0.0026546
	797.5	0.000796017	0.00137953	0.0003805	0.00179383	0.00273887	0.0036597	0.0024616	0.00214847	0.00243247	0.00252717
	798	0.000479193	0.0011914	0.000279573	0.0019123	0.0031406	0.0033955	0.00265607	0.00223367	0.0022438	0.0024746
	798.5	0.000680297	0.00156547	0.000281733	0.0018888	0.00315933	0.0035942	0.00232413	0.00233563	0.00225223	0.00233133
	799	0.00122307	0.0020079	0.00032048	0.0019088	0.00288387	0.0042154	0.00190623	0.00235867	0.00207463	0.00233357
	799.5	0.00181417	0.0024509	0.0003365	0.0020135	0.00275493	0.0040536	0.00198103	0.00233307	0.00172877	0.0022272
	800	0.0017886	0.00253477	0.000278897	0.0023389	0.0026107	0.0035415	0.0021817	0.00211813	0.0012901	0.00224473
	800.5	0.001563	0.00225413	0.000360667	0.00228887	0.00269033	0.0033626	0.00220623	0.002361	0.000935043	0.0024718
	801	0.00109514	0.0018729	0.000441311	0.00219577	0.00271377	0.003555	0.00193377	0.0028202	0.0009302	0.00300387
	801.5	0.00066106	0.00153967	0.00050709	0.0020601	0.0026768	0.0039335	0.0015865	0.00305843	0.00138585	0.00305227
	802	0.000312943	0.0012717	0.000461433	0.00201157	0.00211567	0.0035312	0.00193647	0.00262493	0.00210063	0.00303433
	802.5	0.00049869	0.00130789	0.000450833	0.00209897	0.0019795	0.0032553	0.00233657	0.0023498	0.00265607	0.00277537
	803	0.00108154	0.00186977	0.0003763	0.00200087	0.00209137	0.0031824	0.00233863	0.00197963	0.0027295	0.00263557
	803.5	0.00141747	0.00211483	0.00027453	0.00171953	0.0024063	0.0037206	0.0021165	0.00151713	0.00250373	0.00266133
	804	0.00156043	0.00208473	0.000249313	0.0015739	0.00260997	0.0039052	0.00187307	0.00146883	0.0023524	0.0028411
	804.5	0.00130355	0.00182713	0.00029278	0.00172713	0.00260337	0.0038965	0.00229887	0.00184743	0.00215807	0.00294117
	805	0.001206	0.00180767	0.000367176	0.00201623	0.00239597	0.003876	0.0023492	0.00228457	0.0017107	0.00287523
	805.5	0.00121272	0.00202637	0.000380164	0.0021638	0.00180117	0.0041639	0.00249553	0.00232687	0.0014151	0.0027387
	806	0.00127844	0.00195267	0.000337767	0.0020341	0.00164887	0.0039108	0.0024063	0.00232593	0.0012214	0.00258873
	806.5	0.00133077	0.0018366	0.000277163	0.00176193	0.0017607	0.0035931	0.0026198	0.00240473	0.00106672	0.00270373
	807	0.00127844	0.0017925	0.000227537	0.001563	0.0019343	0.0034545	0.00244507	0.0020926	0.00134087	0.00297903
	807.5	0.00107486	0.0017366	0.000273053	0.00166423	0.00216217	0.0033719	0.00200137	0.00189637	0.0018535	0.00307963
	808	0.00105395	0.0019425	0.000357867	0.0016364	0.0022067	0.0032624	0.00159907	0.00200763	0.0024635	0.0029182
	808.5	0.00115168	0.0020039	0.000417533	0.0014856	0.0019663	0.003458	0.0016798	0.0023189	0.00240343	0.002663
	809	0.0011697	0.00201747	0.0003516	0.00160013	0.00169107	0.0034225	0.00195193	0.00218	0.00236643	0.00251823
	809.5	0.00118142	0.00214833	0.000232717	0.00186273	0.00188527	0.003498	0.00229273	0.00206997	0.00256463	0.002148
	810	0.0017265	0.00275287	0.000126597	0.00174173	0.00222563	0.0039731	0.00266263	0.00205983	0.00258143	0.00194267

## Sheet: Exp. A bottle 3
Experiment A		Average of Bottle 3 Chl fluorescence measurements [W]; time in hours
bottle 3		12	24	36	48	60	72	84	96	108	168
	Wavelength [nm]	Pm	Am	Pm	Am	Pm	Am	Pm	Am	Pm	Am
	400	0.00194223	0.0015987	0.000625407	0.00057512	0.00021179	0.00030884	0.000115377	0.00026038	2.11547e-05	0.000329713
	400.5	0.00197747	0.00159025	0.000592847	0.000588727	0.000275947	0.0003131	0.000156743	0.00022701	4.95797e-05	0.000289247
	401	0.0019967	0.00160895	0.00059533	0.000610717	0.00024641	0.00036307	0.00021782	0.000149015	4.07663e-05	0.00021446
	401.5	0.00201547	0.00164595	0.000632603	0.00061284	0.000258683	0.00037775	0.000213213	0.000105778	1.7691e-05	0.000143819
	402	0.00200067	0.00164775	0.000668137	0.000601453	0.00024883	0.00035938	0.000189447	7.3837e-05	3.75467e-06	9.29177e-05
	402.5	0.00200217	0.0016467	0.000682447	0.000574727	0.000224008	0.00030228	0.00016522	8.2941e-05	0	7.137e-05
	403	0.00200097	0.00162055	0.000685743	0.000544097	0.000253283	0.0002113	0.0001553	7.56283e-05	0	7.25647e-05
	403.5	0.0019975	0.00160355	0.00069055	0.000523667	0.00027487	0.00016071	0.000209483	7.76577e-05	0	6.5695e-05
	404	0.00200743	0.00159025	0.000736233	0.000507523	0.00028317	0.00017502	0.000267387	9.751e-05	0	5.29567e-05
	404.5	0.0019955	0.0015591	0.000781273	0.00050287	0.000259827	0.00022727	0.000294813	0.000122097	0	7.70283e-05
	405	0.00200237	0.00154775	0.000787183	0.000522057	0.000173153	0.00027836	0.000291197	0.00016901	3.08491e-06	0.000124853
	405.5	0.00200507	0.00151045	0.00076341	0.00055024	0.000120584	0.00032262	0.0002279	0.00020643	4.93173e-05	0.000171457
	406	0.0019962	0.00152165	0.00075522	0.0005576	0.000106683	0.00033493	0.000204358	0.0002229	0.000107391	0.000220287
	406.5	0.0020317	0.00156995	0.000735723	0.000542777	0.000118378	0.00034004	0.000177842	0.000218773	0.000152	0.00023448
	407	0.002071	0.0016074	0.00072236	0.00051349	0.000152894	0.00034319	0.00011972	0.000205957	8.15107e-05	0.000230677
	407.5	0.00210643	0.00163945	0.00070364	0.000487427	0.000200017	0.00035704	0.000113448	0.000193567	2.9668e-05	0.000238823
	408	0.00213103	0.001632	0.000660313	0.000477987	0.00022097	0.00036576	0.000104879	0.00017929	2.56647e-05	0.000279523
	408.5	0.00212953	0.00163405	0.000645553	0.000482177	0.000249027	0.00038271	0.00012016	0.000153093	3.1409e-05	0.00030117
	409	0.00210153	0.0016328	0.00065713	0.000512933	0.000285463	0.00034611	0.000113829	0.000114168	1.43403e-05	0.000310397
	409.5	0.0020926	0.00165455	0.000672107	0.000543807	0.000327187	0.00029954	7.5339e-05	9.90613e-05	0	0.0003137
	410	0.00207527	0.00166675	0.00070382	0.00059328	0.000355593	0.00022701	6.01053e-05	0.000115348	0	0.000281453
	410.5	0.00208077	0.00170725	0.00073084	0.000602757	0.00031848	0.00018429	7.18177e-05	0.000155586	0	0.000248044
	411	0.00210653	0.00174045	0.000763723	0.000601873	0.000237703	0.00015667	6.85217e-05	0.00020741	0	0.000198804
	411.5	0.00211667	0.0017428	0.000809753	0.00058055	0.000175926	0.00013204	6.6476e-05	0.000235907	0	0.00013865
	412	0.0021436	0.0017421	0.00090532	0.000549863	0.000185567	0.00012853	7.1753e-05	0.000255263	0	0.000102703
	412.5	0.00214993	0.00175675	0.000979253	0.000536583	0.00024916	0.000131	0.000115095	0.000254783	0	8.0365e-05
	413	0.00216233	0.0017985	0.00100348	0.000544557	0.000288193	0.00018295	0.000174683	0.000249117	0	7.84047e-05
	413.5	0.0021922	0.00184395	0.00099497	0.000581263	0.000330813	0.00029103	0.000195793	0.000206577	0	0.000122758
	414	0.0022699	0.0019176	0.00095401	0.00061748	0.00035515	0.00039643	0.000177707	0.00017173	0	0.000178077
	414.5	0.0023956	0.00202025	0.00093273	0.000643097	0.000409443	0.00043081	0.00015048	0.00014223	0	0.000198323
	415	0.00248957	0.00209265	0.00092151	0.000654873	0.0004151	0.00040349	0.000116639	0.000127014	0	0.00017715
	415.5	0.00253313	0.0021016	0.000898193	0.000672353	0.00039088	0.00035741	0.000113222	0.000175503	1.58727e-06	0.00013282
	416	0.00257423	0.0020874	0.000896283	0.000706443	0.000358403	0.0003356	0.000124053	0.000222437	7.587e-06	0.000114271
	416.5	0.00261347	0.00208415	0.000918033	0.000733567	0.000286283	0.00037726	0.000152097	0.00026698	1.12418e-05	0.000116814
	417	0.0027126	0.00214755	0.000953653	0.00073487	0.00031792	0.00042482	0.00020163	0.000258313	3.06633e-05	0.000131929
	417.5	0.00278787	0.00222465	0.00101058	0.000732867	0.000347613	0.00042565	0.000282543	0.000260663	1.51369e-05	0.000158193
	418	0.00286477	0.00230345	0.00107123	0.000749037	0.000428327	0.00041435	0.000327587	0.000276343	1.1982e-05	0.00019292
	418.5	0.00295147	0.00235265	0.00114783	0.000785333	0.000535573	0.00040066	0.00035307	0.000294967	1.76783e-06	0.000220033
	419	0.00302973	0.0024026	0.00120757	0.00082988	0.000589373	0.00038404	0.000360153	0.00029138	0	0.000199683
	419.5	0.0031266	0.0024486	0.0013329	0.000842143	0.000626803	0.0003743	0.000337137	0.000263837	0	0.000194273
	420	0.00324643	0.00251465	0.00143877	0.000852893	0.000664017	0.00036763	0.000347697	0.000281123	0	0.000193003
	420.5	0.0033714	0.0026204	0.00155603	0.000870947	0.00063914	0.00039158	0.00029746	0.00031333	0	0.000210477
	421	0.00347613	0.00269395	0.00163687	0.00090747	0.00060041	0.00042817	0.000262103	0.00036067	0	0.000223563
	421.5	0.00355233	0.00274775	0.00164273	0.000979993	0.00054373	0.00043584	0.000200523	0.00035985	0	0.000259713
	422	0.00366243	0.00282705	0.00163857	0.0010598	0.00050275	0.00041805	0.000205017	0.000322517	6.00403e-05	0.000308693
	422.5	0.00382347	0.00293555	0.0016521	0.00113977	0.000518823	0.00041581	0.000226407	0.00030916	0.000116771	0.000334757
	423	0.00399637	0.00309055	0.0017435	0.0012018	0.000558053	0.00046002	0.000259393	0.000284867	0.000126	0.00033793
	423.5	0.00416963	0.0032492	0.00185527	0.0012439	0.000598313	0.00053378	0.000302283	0.00025947	0.000104015	0.00027636
	424	0.00435343	0.00342265	0.00199323	0.0013049	0.00064335	0.00062535	0.000300763	0.000248277	0.000110332	0.000224107
	424.5	0.00458393	0.0036391	0.00208827	0.00137303	0.0006856	0.00066986	0.00032158	0.000203533	0.000149967	0.000236087
	425	0.00487343	0.00388765	0.00219807	0.00142093	0.000736813	0.00070677	0.000317743	0.00019778	0.000178809	0.000292683
	425.5	0.00520003	0.00414405	0.00232097	0.00145713	0.000762437	0.00069475	0.000341003	0.00025322	0.000212433	0.000322357
	426	0.00554797	0.0043975	0.00245403	0.0015022	0.000839737	0.00064884	0.00036212	0.000342337	0.000275613	0.000338563
	426.5	0.00588903	0.0046271	0.00259577	0.00159087	0.000899277	0.00059911	0.000392707	0.000414897	0.000365763	0.000313293
	427	0.0062095	0.00482165	0.00273057	0.0016976	0.00100408	0.0005794	0.000420663	0.000423507	0.00045538	0.00027884
	427.5	0.00655303	0.0050493	0.00289273	0.00179917	0.00110417	0.00060865	0.000449277	0.000394637	0.00048812	0.000306093
	428	0.0069527	0.00535075	0.00308163	0.0018926	0.00115393	0.00062767	0.00049089	0.000395043	0.00047911	0.000356237
	428.5	0.0073856	0.0056928	0.00331283	0.0020045	0.00123	0.00066375	0.000539167	0.000472533	0.00047363	0.00042612
	429	0.00788937	0.00609725	0.0035675	0.0021398	0.00133733	0.00064834	0.000616267	0.000554363	0.000469827	0.0004852
	429.5	0.00840767	0.00648665	0.00382233	0.0023111	0.0014384	0.00069064	0.000634463	0.000596377	0.000526193	0.000540693
	430	0.00898543	0.0068973	0.00406987	0.00248707	0.00156417	0.00073747	0.000634817	0.000608367	0.000594003	0.000578413
	430.5	0.00962297	0.0073787	0.0043171	0.00264383	0.00168227	0.00076958	0.00063405	0.00062338	0.000646707	0.000605883
	431	0.0103168	0.00789845	0.00462093	0.00283337	0.00176897	0.00077536	0.00066562	0.000672457	0.00064317	0.0006198
	431.5	0.0110353	0.00844555	0.00497293	0.00301607	0.0019018	0.00080124	0.000759877	0.000746333	0.000606657	0.00065135
	432	0.0118453	0.00905205	0.00539173	0.00321137	0.00201547	0.00089044	0.000834847	0.00082104	0.000579043	0.000700657
	432.5	0.0127327	0.0096958	0.0058189	0.00343447	0.00212613	0.0010025	0.00088449	0.000870063	0.000643853	0.00077431
	433	0.0137083	0.0104423	0.00627967	0.0036796	0.00228	0.0010934	0.000937567	0.000913023	0.000775877	0.000832213
	433.5	0.014757	0.0112478	0.00675197	0.003944	0.00242603	0.0011297	0.000984027	0.000966867	0.00093279	0.000869807
	434	0.015829	0.01208	0.0072323	0.0042292	0.00257477	0.0011484	0.00103357	0.00101286	0.00109264	0.000899037
	434.5	0.0169013	0.0129045	0.0077328	0.00448593	0.0027312	0.0012153	0.00108396	0.00110295	0.00118787	0.00096457
	435	0.0180667	0.013737	0.00825057	0.00476797	0.00290357	0.0013522	0.0011393	0.001213	0.0012511	0.00102355
	435.5	0.0194187	0.014729	0.00888187	0.0051218	0.0031493	0.0014598	0.0012468	0.00130573	0.00131153	0.00110887
	436	0.021014	0.015875	0.00960617	0.0055421	0.00340893	0.0015373	0.00139407	0.00142277	0.00137223	0.00119843
	436.5	0.022841	0.0172175	0.0104542	0.00602813	0.00367623	0.0015668	0.00156013	0.00151673	0.00146887	0.00133547
	437	0.0248677	0.018715	0.0114262	0.0065584	0.00395057	0.0016296	0.00172727	0.00161	0.00161693	0.0014834
	437.5	0.0269787	0.0202265	0.0124257	0.00709597	0.00423237	0.0017712	0.0018882	0.00171337	0.00183897	0.00164223
	438	0.029202	0.0218715	0.0134757	0.00764497	0.0045819	0.0019892	0.00202617	0.00184653	0.00209413	0.0017538
	438.5	0.031535	0.023599	0.014572	0.00823187	0.00495727	0.0022104	0.0021861	0.00203027	0.0023382	0.00184657
	439	0.034042	0.0255055	0.015741	0.00886073	0.00533693	0.0024143	0.00233937	0.0022225	0.00252793	0.00194393
	439.5	0.0367633	0.027596	0.016998	0.0095576	0.00576733	0.0026119	0.0024993	0.0024072	0.0027002	0.0020549
	440	0.0396687	0.0298165	0.0183653	0.0103383	0.00623427	0.0027681	0.0026674	0.0025746	0.0029413	0.00221947
	440.5	0.0427943	0.0322125	0.019858	0.011227	0.00678587	0.00295	0.0028692	0.0027699	0.00318717	0.00240853
	441	0.0461577	0.0347685	0.021464	0.012169	0.0074068	0.0031889	0.00313243	0.00300217	0.00342927	0.00262987
	441.5	0.0498643	0.03759	0.0232033	0.0131967	0.0080218	0.0034386	0.0034474	0.00327783	0.00373723	0.00288437
	442	0.0538583	0.040601	0.0250653	0.0142537	0.0086516	0.0037243	0.00378163	0.0035694	0.00408103	0.00315433
	442.5	0.058066	0.0438395	0.027086	0.0153843	0.00931567	0.0040086	0.00409197	0.00388927	0.00443173	0.0034384
	443	0.0625117	0.047282	0.029333	0.016635	0.0100587	0.0042764	0.00440903	0.0042048	0.00475187	0.00371953
	443.5	0.067273	0.0510205	0.031755	0.017982	0.0109023	0.0046285	0.00475287	0.0045437	0.00508583	0.0039916
	444	0.0725077	0.0551555	0.034391	0.0194677	0.0118723	0.004993	0.00516487	0.00493253	0.00553137	0.00429927
	444.5	0.0781313	0.0596055	0.037213	0.0210987	0.0129283	0.005383	0.00562097	0.00533243	0.00604673	0.00464313
	445	0.0841333	0.0643755	0.0402523	0.0228723	0.0140427	0.0058621	0.00609763	0.0057811	0.00657677	0.0050564
	445.5	0.090559	0.069477	0.0435553	0.024819	0.015209	0.0063542	0.00660383	0.00624403	0.00707623	0.00550837
	446	0.097513	0.0749895	0.0471683	0.026936	0.0164573	0.0069424	0.00715663	0.00676507	0.00762703	0.0059735
	446.5	0.105217	0.081062	0.0512043	0.0292707	0.0178687	0.0075746	0.00779537	0.00737247	0.00830793	0.00645473
	447	0.113443	0.0875935	0.0556017	0.0317853	0.0194963	0.0082491	0.00848203	0.00803	0.0090699	0.006963
	447.5	0.12215	0.0945395	0.0602963	0.034503	0.0212777	0.0089521	0.00921967	0.00873443	0.00990603	0.00751627
	448	0.131523	0.102013	0.0653777	0.0374713	0.0232077	0.0097115	0.0100481	0.00948213	0.0108303	0.00811043
	448.5	0.141687	0.110197	0.0708823	0.0407683	0.025297	0.010552	0.0109907	0.0102698	0.0118086	0.00876357
	449	0.153013	0.11928	0.0770457	0.0444637	0.0275103	0.011481	0.0120697	0.0111418	0.012833	0.00946447
	449.5	0.16529	0.12922	0.083781	0.0484707	0.0298937	0.012496	0.013174	0.01208	0.0139263	0.0102712
	450	0.178287	0.139815	0.0910203	0.0527403	0.032511	0.013581	0.0143487	0.0131047	0.015067	0.0111783
	450.5	0.191987	0.151055	0.098661	0.0572067	0.035335	0.014783	0.0155977	0.014236	0.016285	0.0121287
	451	0.206943	0.16331	0.106954	0.062117	0.0385557	0.016087	0.0169787	0.0155007	0.0176413	0.013183
	451.5	0.22274	0.176795	0.116073	0.06754	0.0421473	0.017518	0.0185033	0.016879	0.0191203	0.014342
	452	0.236467	0.1912	0.125857	0.0734093	0.0460513	0.019037	0.0200787	0.018381	0.0207393	0.0156
	452.5	0.24543	0.205705	0.13647	0.079775	0.050268	0.020675	0.0218023	0.0199923	0.022536	0.016958
	453	0.24953	0.218325	0.147733	0.086581	0.0546787	0.0225	0.0236977	0.021707	0.02448	0.018388
	453.5	0.25016	0.22903	0.158737	0.0939587	0.0594117	0.024491	0.025768	0.023509	0.026632	0.0198707
	454	0.2501	0.23777	0.168317	0.101754	0.0643833	0.026619	0.0280047	0.0254047	0.0289443	0.021474
	454.5	0.24937	0.24357	0.175147	0.109807	0.0695457	0.028852	0.0303133	0.0273697	0.031267	0.023159
	455	0.24823	0.24646	0.178917	0.118267	0.0750207	0.031175	0.0327317	0.029505	0.033673	0.0249093
	455.5	0.24646	0.24646	0.180327	0.127057	0.0806617	0.033578	0.03525	0.031758	0.0361947	0.026747
	456	0.24493	0.24493	0.180473	0.136217	0.0865687	0.035994	0.0378483	0.0340523	0.0387643	0.0286287
	456.5	0.2434	0.2434	0.17965	0.14542	0.0925927	0.038484	0.0404663	0.0364077	0.0413817	0.030573
	457	0.24217	0.24217	0.17876	0.154773	0.098716	0.041002	0.043107	0.038782	0.044076	0.0326003
	457.5	0.24099	0.24099	0.17789	0.16389	0.104847	0.043522	0.0457313	0.041213	0.0467953	0.0346837
	458	0.23963	0.23963	0.17686	0.170727	0.110617	0.045933	0.0483117	0.043495	0.0494823	0.0366877
	458.5	0.2385	0.2385	0.17602	0.174693	0.116203	0.048224	0.050814	0.0456903	0.052099	0.0386303
	459	0.23728	0.23728	0.17514	0.175793	0.121543	0.050357	0.053213	0.0477727	0.0545197	0.040453
	459.5	0.23619	0.23619	0.17435	0.17513	0.126673	0.052419	0.0554083	0.049786	0.0567697	0.042137
	460	0.23524	0.23524	0.17366	0.17444	0.131523	0.054303	0.0574383	0.0517327	0.058917	0.0437187
	460.5	0.23421	0.23421	0.17284	0.17365	0.135593	0.055953	0.0591893	0.053358	0.0607957	0.0450303
	461	0.23343	0.23343	0.17218	0.17301	0.138953	0.057329	0.06061	0.0546967	0.0623983	0.0461277
	461.5	0.23281	0.23281	0.17168	0.17253	0.14161	0.05838	0.0617433	0.0557287	0.0637183	0.0469753
	462	0.232	0.232	0.17107	0.17194	0.14347	0.059047	0.0625227	0.05637	0.0646417	0.047587
	462.5	0.23145	0.23145	0.17069	0.17158	0.1447	0.059387	0.0630013	0.0567633	0.0652843	0.0479987
	463	0.23094	0.23094	0.17032	0.17121	0.144907	0.059342	0.0630763	0.0567857	0.0654997	0.0481657
	463.5	0.2307	0.2307	0.17014	0.17104	0.144527	0.059117	0.0628807	0.056663	0.0654817	0.048118
	464	0.22984	0.22984	0.1695	0.17041	0.143433	0.058625	0.062384	0.0563273	0.0650967	0.047805
	464.5	0.22874	0.22874	0.16869	0.16961	0.141593	0.057789	0.0615007	0.055639	0.0643557	0.0471683
	465	0.22772	0.22772	0.16797	0.16886	0.139067	0.056644	0.0602793	0.0546283	0.063319	0.046331
	465.5	0.22678	0.22678	0.16729	0.16816	0.135747	0.055102	0.0587107	0.0533003	0.0619353	0.0452693
	466	0.22627	0.22627	0.16687	0.16774	0.131883	0.053379	0.0569957	0.0518147	0.060318	0.0441217
	466.5	0.22566	0.22566	0.16635	0.16726	0.12776	0.051515	0.0551967	0.0502837	0.0585443	0.0428637
	467	0.22501	0.22501	0.16577	0.16674	0.123213	0.049484	0.0531853	0.0485513	0.0565537	0.041459
	467.5	0.22476	0.22476	0.16559	0.16656	0.118377	0.047411	0.0510327	0.04668	0.05453	0.039954
	468	0.22425	0.22425	0.16529	0.16622	0.11329	0.045273	0.0487817	0.0446957	0.0523853	0.0383193
	468.5	0.22411	0.22411	0.16528	0.16553	0.10825	0.043192	0.0466247	0.0427237	0.0502793	0.0366603
	469	0.22426	0.22426	0.16546	0.163387	0.103263	0.041167	0.0445093	0.0408143	0.0481357	0.0349723
	469.5	0.22388	0.22388	0.1652	0.15894	0.098309	0.039175	0.042345	0.038863	0.045949	0.0332727
	470	0.22281	0.22281	0.16442	0.15237	0.0933703	0.037188	0.0401647	0.0369033	0.0437553	0.0315987
	470.5	0.2215	0.2215	0.16344	0.14512	0.088754	0.035383	0.038086	0.0350573	0.041666	0.03007
	471	0.22001	0.22001	0.16235	0.138213	0.0844483	0.033655	0.0361537	0.033373	0.0396907	0.028684
	471.5	0.21918	0.21918	0.16176	0.13198	0.080579	0.032137	0.0344117	0.0318513	0.037921	0.027447
	472	0.21817	0.21817	0.16103	0.126183	0.0769653	0.03064	0.032834	0.03045	0.0362543	0.0262927
	472.5	0.21698	0.21698	0.16015	0.120677	0.073543	0.029253	0.031367	0.029097	0.0346943	0.0251663
	473	0.21586	0.21586	0.159243	0.11553	0.070431	0.028046	0.0300797	0.0279007	0.0333247	0.0240607
	473.5	0.21484	0.21484	0.15796	0.110747	0.0675547	0.026947	0.028897	0.0267637	0.032054	0.0230217
	474	0.21393	0.21393	0.156287	0.106377	0.064907	0.025994	0.0278383	0.025721	0.0308587	0.022091
	474.5	0.21301	0.21301	0.15419	0.10242	0.0624773	0.025105	0.0268767	0.024761	0.0297003	0.0213017
	475	0.21166	0.21165	0.15178	0.0987767	0.060185	0.024286	0.0259833	0.023903	0.0285957	0.020578
	475.5	0.20985	0.209515	0.149293	0.0954147	0.0580827	0.023522	0.025173	0.02312	0.0276037	0.0198687
	476	0.2082	0.206805	0.147017	0.0923253	0.0561743	0.022794	0.0244227	0.0223753	0.0267337	0.0191593
	476.5	0.20706	0.20366	0.144847	0.0894837	0.054444	0.022092	0.0237177	0.0217	0.0259713	0.018559
	477	0.20645	0.20046	0.142663	0.0868173	0.052852	0.021407	0.023035	0.021059	0.0252603	0.0180513
	477.5	0.20592	0.19746	0.14027	0.0843003	0.0514037	0.020789	0.022372	0.020484	0.024579	0.017599
	478	0.20462	0.194095	0.137377	0.0817927	0.0499547	0.020199	0.021677	0.0199053	0.0238453	0.0171223
	478.5	0.20253	0.19017	0.13381	0.0792353	0.0484167	0.019631	0.0209913	0.019297	0.0230587	0.0165637
	479	0.20023	0.18601	0.129693	0.076597	0.0467963	0.01906	0.0202657	0.0186433	0.0222413	0.015967
	479.5	0.19829	0.181985	0.12521	0.0738793	0.0451023	0.018499	0.0195513	0.018002	0.02148	0.0153927
	480	0.1972	0.178575	0.12086	0.0713067	0.0435297	0.017934	0.0188737	0.0173983	0.0207663	0.0148533
	480.5	0.19605	0.175065	0.116583	0.0687693	0.0419917	0.017369	0.0182187	0.0168643	0.020061	0.014366
	481	0.1946	0.170585	0.112311	0.066252	0.0404667	0.016762	0.017575	0.016314	0.0193203	0.0138647
	481.5	0.19235	0.165065	0.107996	0.063742	0.0389067	0.016136	0.0169617	0.0157247	0.018536	0.0133343
	482	0.188677	0.15856	0.103567	0.061156	0.0372847	0.015497	0.016326	0.0150837	0.017744	0.0127727
	482.5	0.18405	0.15183	0.0992207	0.0586417	0.0356797	0.014908	0.0156987	0.0144893	0.0169867	0.0122127
	483	0.17785	0.14525	0.0949717	0.056201	0.034126	0.014282	0.015075	0.013914	0.0162697	0.0116733
	483.5	0.170713	0.138715	0.090756	0.0537823	0.0326267	0.013686	0.0144423	0.0133307	0.0155957	0.0111548
	484	0.16312	0.13242	0.0867157	0.0514503	0.0312447	0.013093	0.0138447	0.0127477	0.0149717	0.0106386
	484.5	0.155303	0.126245	0.082764	0.049129	0.0299087	0.012522	0.0132193	0.012172	0.0142997	0.0101557
	485	0.147607	0.120145	0.0788707	0.0468473	0.0286073	0.012003	0.0126097	0.011652	0.0136293	0.00973897
	485.5	0.140243	0.114272	0.0751997	0.0446927	0.0273287	0.011525	0.012033	0.0111704	0.0130033	0.00936983
	486	0.133203	0.108641	0.0717237	0.042661	0.0261243	0.01111	0.0114837	0.0107088	0.0124283	0.0090308
	486.5	0.12666	0.103411	0.068501	0.0407893	0.0250227	0.010711	0.0110403	0.0102749	0.0119253	0.00864827
	487	0.120553	0.0986145	0.0655057	0.0390557	0.0239957	0.010348	0.0106428	0.0098828	0.0114423	0.00823393
	487.5	0.11487	0.0942485	0.0626707	0.0374927	0.023096	0.010018	0.0103158	0.0095116	0.0109625	0.00788197
	488	0.109377	0.090044	0.0599527	0.0360183	0.0222127	0.0096843	0.00995863	0.0091355	0.0105221	0.00755667
	488.5	0.10424	0.086019	0.0574543	0.0346067	0.021388	0.009373	0.00960137	0.00879327	0.0101102	0.00729377
	489	0.0993767	0.082118	0.055157	0.0332583	0.020597	0.0090597	0.00923223	0.00848893	0.00973703	0.00704593
	489.5	0.094888	0.078535	0.0530747	0.0319997	0.0198767	0.0087929	0.00890453	0.00823323	0.0094326	0.006795
	490	0.0908037	0.0753595	0.0511813	0.0308893	0.0192353	0.0086004	0.00862827	0.00800733	0.009145	0.00656557
	490.5	0.0870183	0.0724585	0.0493873	0.02988	0.018658	0.0083993	0.00840547	0.00777793	0.00886077	0.00637173
	491	0.0835163	0.0698085	0.047691	0.0289547	0.0181327	0.0082001	0.00821397	0.00753677	0.00857353	0.00617227
	491.5	0.0801877	0.067271	0.0460873	0.02808	0.0176017	0.0079832	0.00801367	0.00731517	0.00830437	0.00600373
	492	0.0771313	0.0649635	0.044649	0.027275	0.0171333	0.0077746	0.00784057	0.00713153	0.00807047	0.00585877
	492.5	0.074338	0.062834	0.0433263	0.0265673	0.0167017	0.0075888	0.00767267	0.00698903	0.0078528	0.00571187
	493	0.0717967	0.060876	0.042147	0.0259397	0.0163197	0.007465	0.00751633	0.00689563	0.00764267	0.0055759
	493.5	0.069448	0.0590405	0.041055	0.025383	0.016017	0.007377	0.00738917	0.0068072	0.00748533	0.00543787
	494	0.0671387	0.0572705	0.0400337	0.0248353	0.0157453	0.0073112	0.00726197	0.0067268	0.0073639	0.0053584
	494.5	0.0648533	0.055517	0.0390397	0.0242847	0.0154983	0.0072164	0.00716537	0.00662463	0.00724617	0.00530553
	495	0.06256	0.053796	0.0380437	0.023727	0.0152327	0.0070849	0.00706997	0.0064926	0.00709327	0.0052302
	495.5	0.060382	0.0521425	0.0370817	0.0232123	0.0149553	0.006994	0.00696003	0.0063774	0.0069033	0.00513353
	496	0.058331	0.050581	0.0361323	0.0226957	0.0146523	0.0068953	0.00687003	0.0062613	0.00672597	0.00503857
	496.5	0.0564227	0.0491045	0.03524	0.0222043	0.014378	0.006816	0.00679407	0.00614797	0.0066027	0.00494533
	497	0.054601	0.0477105	0.0344	0.0217387	0.0141337	0.0066629	0.00672733	0.00602283	0.00650253	0.00488157
	497.5	0.052811	0.0463395	0.033581	0.021282	0.0139113	0.0064736	0.00663557	0.00589867	0.00639613	0.00481557
	498	0.0510123	0.0449565	0.03277	0.0208523	0.0136953	0.0062974	0.00652817	0.00579207	0.00627943	0.00474153
	498.5	0.0492213	0.0435455	0.0319007	0.020397	0.013422	0.0062038	0.006428	0.00571813	0.00614203	0.00463553
	499	0.047397	0.042075	0.0310087	0.0199373	0.0131317	0.0061576	0.0063236	0.00563673	0.00602013	0.00451253
	499.5	0.0456163	0.0406135	0.0301377	0.0194657	0.012863	0.0061608	0.00620253	0.00554223	0.00592283	0.0044115
	500	0.0439083	0.0392215	0.0292847	0.018997	0.0125993	0.0061265	0.00608193	0.0054533	0.00581597	0.0043398
	500.5	0.042258	0.037907	0.0284647	0.0185177	0.012393	0.0060382	0.00595883	0.00533233	0.0057186	0.00427983
	501	0.0406507	0.03666	0.0276333	0.018038	0.0121973	0.005946	0.0058309	0.0052409	0.00560247	0.0042214
	501.5	0.0390117	0.035403	0.026774	0.0175563	0.0120013	0.0058204	0.0057106	0.00512697	0.00547307	0.00417493
	502	0.0374197	0.0341365	0.0259227	0.0170907	0.0117587	0.0057187	0.00556923	0.00502197	0.00535957	0.00416117
	502.5	0.0358627	0.0328655	0.025075	0.016643	0.0114743	0.0056384	0.00549643	0.00493923	0.00522917	0.00411537
	503	0.0343323	0.031586	0.0242473	0.016184	0.0112063	0.0055694	0.00542377	0.00484597	0.005053	0.0040427
	503.5	0.0328593	0.030338	0.0234557	0.0157233	0.0109513	0.0054852	0.00536123	0.00480767	0.0048716	0.0039468
	504	0.031504	0.029186	0.0226637	0.0152927	0.0107297	0.0053845	0.00527133	0.0047401	0.00470957	0.00386527
	504.5	0.0302263	0.0280875	0.0219137	0.0148667	0.0104473	0.0052227	0.0051533	0.00465953	0.00461807	0.00377453
	505	0.0289713	0.027041	0.0211753	0.01446	0.0101965	0.0050666	0.00505083	0.00455903	0.0045566	0.0036819
	505.5	0.027718	0.0260235	0.0204737	0.0140527	0.0099623	0.0049177	0.00496837	0.00447033	0.0044968	0.0036001
	506	0.026504	0.0250265	0.0197993	0.013635	0.00977413	0.0047777	0.00491357	0.00441113	0.00442527	0.0035369
	506.5	0.025411	0.024096	0.0191843	0.0132477	0.00961327	0.0046636	0.0048594	0.00434407	0.00434113	0.00350707
	507	0.0243843	0.023202	0.0186133	0.0128877	0.00942027	0.0045953	0.00481133	0.00426943	0.00424817	0.0034651
	507.5	0.023421	0.0223805	0.0180787	0.012558	0.00921393	0.0045654	0.00475797	0.00420407	0.00413683	0.00341917
	508	0.0225013	0.0215815	0.0175343	0.0122533	0.00898853	0.0045596	0.0046735	0.00415473	0.00404493	0.0033945
	508.5	0.0216513	0.020838	0.017015	0.0119693	0.00878127	0.0045198	0.00457877	0.0040944	0.00398737	0.003375
	509	0.020826	0.020082	0.0165017	0.0116997	0.00860863	0.0044658	0.0044923	0.0040234	0.0039005	0.0033583
	509.5	0.0200303	0.019374	0.0160283	0.0114383	0.0084379	0.0043968	0.00445347	0.00394527	0.00381853	0.00331457
	510	0.0192887	0.0187295	0.0155857	0.011177	0.0082913	0.0043412	0.0044449	0.00390507	0.003719	0.0032306
	510.5	0.018584	0.018132	0.0151803	0.010911	0.0081578	0.0043204	0.0044172	0.00389327	0.0036546	0.00316607
	511	0.0179187	0.0175785	0.0147917	0.0106603	0.00802307	0.0043092	0.0043733	0.0038607	0.00362987	0.00310793
	511.5	0.017246	0.0169895	0.0143847	0.010442	0.0078935	0.0043205	0.00434793	0.00383017	0.00363577	0.003066
	512	0.016632	0.0164745	0.0139903	0.0102523	0.00775487	0.0043174	0.00433583	0.0037853	0.0036605	0.0030146
	512.5	0.0160727	0.0159785	0.0136123	0.0100516	0.00764217	0.0042587	0.00431127	0.00376007	0.0036637	0.00294737
	513	0.015561	0.015515	0.013259	0.00984463	0.0075565	0.0041613	0.00425577	0.0037592	0.00363337	0.00291817
	513.5	0.0150753	0.0150965	0.0129123	0.00962097	0.00750037	0.0040447	0.004216	0.00375657	0.00360137	0.00291253
	514	0.0145707	0.0146505	0.0125963	0.009416	0.00745407	0.0039886	0.00417883	0.0037553	0.0035933	0.00293397
	514.5	0.014122	0.014272	0.0122933	0.0092291	0.00738417	0.0039805	0.00415723	0.00373207	0.0035561	0.0029734
	515	0.01367	0.013836	0.0120117	0.00903167	0.00728287	0.0039884	0.00413007	0.00369633	0.00345397	0.003001
	515.5	0.0132227	0.0133835	0.0117333	0.00883163	0.00716207	0.0039474	0.00408703	0.00364513	0.0033529	0.00301803
	516	0.0127227	0.012914	0.011441	0.0086325	0.00703567	0.0038569	0.00404733	0.00361003	0.00329117	0.00300513
	516.5	0.0122473	0.0124925	0.011153	0.0084423	0.0069355	0.0037693	0.00399607	0.00358153	0.00329167	0.00295527
	517	0.0118213	0.012117	0.0108351	0.0082719	0.00679943	0.0036777	0.00392847	0.00352707	0.00326787	0.00288147
	517.5	0.0114217	0.0117525	0.0104901	0.00809543	0.00667327	0.0036307	0.00389027	0.0034847	0.00322187	0.0028276
	518	0.0110307	0.011372	0.0101552	0.00790507	0.0065434	0.0036152	0.0038351	0.00343593	0.00318333	0.00280343
	518.5	0.0106423	0.0109998	0.00984177	0.0077128	0.00644693	0.0035677	0.00378973	0.0034159	0.00312337	0.00279917
	519	0.0102671	0.0106667	0.00956217	0.0075228	0.006366	0.0035008	0.00374077	0.00339867	0.00309137	0.0027882
	519.5	0.00992833	0.0103555	0.00927997	0.00733413	0.00623557	0.0034116	0.00371287	0.00334913	0.00305297	0.00274373
	520	0.0095937	0.0100421	0.00898373	0.00714473	0.0060495	0.0033459	0.00368447	0.0032849	0.00303997	0.00269973
	520.5	0.00926047	0.0097021	0.00869713	0.0069482	0.0058258	0.0032808	0.00364693	0.00321087	0.0030363	0.0026635
	521	0.00891577	0.00934785	0.00841373	0.00674767	0.00562797	0.0031817	0.00357187	0.0031615	0.00297963	0.0026045
	521.5	0.0086001	0.00901455	0.00813313	0.00652203	0.00550687	0.0030829	0.00346693	0.00310283	0.0029203	0.00256233
	522	0.00831907	0.00871525	0.00784797	0.0063119	0.00540227	0.0030236	0.00335633	0.0030409	0.00284813	0.002519
	522.5	0.0080616	0.0084136	0.00757287	0.00613463	0.00529983	0.0030009	0.0032506	0.0029824	0.00278727	0.00248453
	523	0.00776687	0.0080777	0.00731293	0.00596527	0.0051771	0.0029622	0.0031732	0.0029366	0.0027462	0.00244413
	523.5	0.00745513	0.00774225	0.0070815	0.00578483	0.00503707	0.0029118	0.00313057	0.002902	0.00267503	0.00240253
	524	0.00716327	0.00744435	0.0068364	0.00557367	0.00489367	0.0028319	0.00309123	0.00283987	0.00258233	0.0023631
	524.5	0.0068825	0.00720385	0.00659307	0.0053806	0.0047326	0.0027639	0.0030555	0.00274707	0.00248287	0.0023153
	525	0.00661567	0.0069808	0.00634987	0.00521843	0.0045356	0.0026999	0.00298467	0.0026537	0.00236253	0.0022343
	525.5	0.0063675	0.0067409	0.00610967	0.00505823	0.00433917	0.0026342	0.00290977	0.00259293	0.00228553	0.0021321
	526	0.0061506	0.0065074	0.00589117	0.00489677	0.004168	0.0025633	0.00285717	0.00256173	0.0022596	0.00207233
	526.5	0.00595807	0.0062841	0.0056621	0.00472543	0.0040293	0.0024875	0.0028113	0.00255583	0.00224403	0.00204733
	527	0.00572973	0.00604945	0.0054424	0.00457277	0.00394157	0.0024066	0.00274497	0.00249683	0.00224073	0.00202913
	527.5	0.00553317	0.00585415	0.00526323	0.00442133	0.00387273	0.0023435	0.00265153	0.00239047	0.00218317	0.00198367
	528	0.00533333	0.005647	0.00511313	0.00426193	0.00380193	0.0023044	0.00255987	0.00225763	0.0021062	0.00189953
	528.5	0.0051727	0.00546985	0.0049756	0.00410287	0.0036986	0.0022468	0.00248487	0.00215897	0.00203357	0.00183077
	529	0.00500347	0.00528325	0.00481533	0.00398113	0.00353733	0.0021598	0.00243837	0.00211433	0.0019805	0.00179053
	529.5	0.00484443	0.00510335	0.00462887	0.00386437	0.00338117	0.0020562	0.00236903	0.00207743	0.0019271	0.00178617
	530	0.0046874	0.0049334	0.00446867	0.00374467	0.0032368	0.0019482	0.00228973	0.0020339	0.00186247	0.00175573
	530.5	0.00455107	0.00479295	0.00433657	0.00361173	0.00314687	0.0018741	0.00220093	0.00198213	0.001773	0.0017064
	531	0.00440923	0.0046443	0.0042387	0.00350203	0.00309923	0.0018295	0.00211033	0.00195277	0.00169403	0.00163813
	531.5	0.00427147	0.00450435	0.00411517	0.0034221	0.00299227	0.0017784	0.0020356	0.0019147	0.00164277	0.00158163
	532	0.0041318	0.0043425	0.0039619	0.00335083	0.00286007	0.0017732	0.00198643	0.00186863	0.0016088	0.00153767
	532.5	0.0040095	0.0041826	0.0038128	0.00323267	0.0027147	0.0017674	0.0019403	0.00179957	0.0015891	0.00149647
	533	0.00390343	0.0040458	0.00367613	0.00309883	0.00263187	0.0017573	0.00189087	0.00174787	0.00155953	0.00146207
	533.5	0.0038072	0.00394405	0.0035501	0.002975	0.00262453	0.0017378	0.00183167	0.00170287	0.00150947	0.00139863
	534	0.00371837	0.0038868	0.0034226	0.002888	0.00259287	0.0016921	0.0017598	0.00164367	0.00143547	0.00136473
	534.5	0.00357263	0.0037784	0.00328247	0.00282143	0.00252887	0.0016465	0.00171603	0.00156167	0.00138313	0.00131437
	535	0.0034375	0.0036448	0.00317083	0.00274617	0.00242863	0.0015805	0.0016696	0.0014731	0.00134623	0.00130013
	535.5	0.00330507	0.00347675	0.00306137	0.00267083	0.00234357	0.0015152	0.00163743	0.00143697	0.00131863	0.00128187
	536	0.00319243	0.0033281	0.00297793	0.00260533	0.00226287	0.0014213	0.00161957	0.00144413	0.00128487	0.00125037
	536.5	0.00309883	0.0032274	0.00287383	0.0025205	0.0021907	0.0013145	0.0015629	0.00145417	0.00121237	0.0012023
	537	0.00300703	0.00316365	0.0027812	0.00244177	0.00215313	0.0012364	0.0015037	0.00143563	0.00119137	0.00117463
	537.5	0.0029508	0.00313045	0.00270197	0.00234953	0.0021092	0.0011992	0.00141847	0.0013913	0.00115627	0.0011555
	538	0.00292067	0.0030847	0.00263807	0.0022784	0.00206173	0.0012172	0.00134607	0.00133947	0.00112667	0.00112757
	538.5	0.0028895	0.0030156	0.0025729	0.00220027	0.00199843	0.0012333	0.0013085	0.00126913	0.0011031	0.00109487
	539	0.00284387	0.0029481	0.00247597	0.00211407	0.00193703	0.0012182	0.00127067	0.00121607	0.0010504	0.00105398
	539.5	0.002791	0.00287815	0.00237923	0.00203583	0.00189963	0.0012028	0.00127643	0.00118347	0.00102328	0.00101945
	540	0.00269867	0.002779	0.00229657	0.00197747	0.00182317	0.0011781	0.0012718	0.0011569	0.000950983	0.00097078
	540.5	0.00258617	0.00266395	0.0022249	0.0019311	0.001757	0.0011696	0.00126757	0.00110723	0.00087766	0.000940853
	541	0.00251117	0.00258115	0.00213843	0.00188223	0.0017033	0.0011808	0.0012108	0.00100933	0.00086584	0.000926417
	541.5	0.00244807	0.0025109	0.00206453	0.00183303	0.00166813	0.0011797	0.0011289	0.000946143	0.00086828	0.00090779
	542	0.0024067	0.00244735	0.00199917	0.00179093	0.00161277	0.0011757	0.00103983	0.000950883	0.000868507	0.00085429
	542.5	0.00235943	0.00237775	0.0019658	0.0017538	0.00155147	0.0011044	0.000972457	0.000969053	0.000820013	0.000801523
	543	0.0023011	0.0023056	0.00195743	0.00171307	0.0014869	0.0010015	0.000957813	0.0009888	0.000712987	0.000768003
	543.5	0.00224603	0.0022459	0.00192177	0.00165483	0.00142637	0.00091333	0.00093543	0.00097868	0.000651893	0.000755717
	544	0.00220507	0.00220755	0.0018728	0.00159737	0.00137647	0.00087652	0.000912417	0.000954887	0.00058603	0.000724547
	544.5	0.00216623	0.00218005	0.00182347	0.0015531	0.0013053	0.0008844	0.00088219	0.000899523	0.000607	0.00068672
	545	0.00214513	0.00216155	0.00176807	0.00152833	0.00126977	0.00088462	0.000855693	0.00083265	0.00066539	0.000661427
	545.5	0.00210323	0.00213375	0.00173857	0.00149023	0.00122923	0.00089351	0.000848477	0.000798133	0.00072133	0.000647683
	546	0.00205247	0.00209485	0.00169733	0.00145563	0.00116773	0.00089104	0.000840027	0.000764787	0.00070971	0.0006346
	546.5	0.00200913	0.00205575	0.00165203	0.0014098	0.00109957	0.00086985	0.000819007	0.00074498	0.00063147	0.0006289
	547	0.00196947	0.00203795	0.0016009	0.00137253	0.00105199	0.00081901	0.000804637	0.000696793	0.000557137	0.000603523
	547.5	0.00195077	0.0020254	0.00153023	0.0013418	0.00102353	0.00077101	0.00075618	0.000688653	0.00051517	0.000606977
	548	0.00192547	0.0020092	0.00149013	0.00130977	0.00102151	0.00079125	0.000722217	0.00069829	0.000545853	0.000596203
	548.5	0.00190153	0.0019701	0.00146403	0.00128217	0.00102266	0.00081721	0.000678663	0.000709057	0.000551423	0.000574193
	549	0.00184867	0.00189895	0.00143797	0.00125313	0.00104863	0.00084696	0.000639517	0.00070136	0.000562297	0.000552697
	549.5	0.0017947	0.00181455	0.0014025	0.00121023	0.0010751	0.00080829	0.000617833	0.00067642	0.000538393	0.00056495
	550	0.0017539	0.0017434	0.0013364	0.00116933	0.00108383	0.00078185	0.000611517	0.0006443	0.00051913	0.000596633
	550.5	0.0017528	0.00170935	0.00127883	0.00114103	0.00108687	0.0007243	0.000637807	0.000615733	0.00052041	0.000593413
	551	0.0017238	0.0016804	0.00121523	0.0011173	0.00105427	0.00067692	0.000692633	0.00060733	0.00051623	0.000565337
	551.5	0.00167947	0.0016385	0.00117643	0.0011028	0.00100898	0.00063597	0.00072816	0.000580783	0.00047951	0.00051862
	552	0.0016089	0.0015761	0.00114983	0.0010796	0.000956343	0.00061013	0.000731973	0.000560727	0.000440133	0.000495207
	552.5	0.00156157	0.00152215	0.00114503	0.0010555	0.000903857	0.0006043	0.00067652	0.000534723	0.000387597	0.000455913
	553	0.0015181	0.00148975	0.00113903	0.00103374	0.00087468	0.00059704	0.00063428	0.000533393	0.00036721	0.00042622
	553.5	0.0014741	0.0014612	0.00109573	0.00101561	0.000821457	0.00057188	0.000602387	0.000544923	0.00038226	0.000429527
	554	0.0014403	0.001431	0.0010427	0.00099819	0.000802437	0.00055573	0.000596737	0.000542283	0.000398023	0.00043609
	554.5	0.00143137	0.0014265	0.0009815	0.000978497	0.000817873	0.00055293	0.000548193	0.00052275	0.000423653	0.000436893
	555	0.00144457	0.0014318	0.000975557	0.000954593	0.000827983	0.00055157	0.00050633	0.000490487	0.00043004	0.000405113
	555.5	0.00146087	0.00144545	0.000978507	0.000932227	0.000790247	0.00056749	0.000470917	0.00047118	0.000440267	0.000374653
	556	0.00144793	0.0014374	0.0009715	0.000903963	0.00072262	0.00058727	0.000503787	0.00047621	0.000415163	0.00036658
	556.5	0.00143453	0.00141725	0.000931863	0.000872353	0.000670557	0.00058096	0.00053005	0.000466017	0.000415523	0.000358903
	557	0.0014211	0.00139465	0.000886907	0.000855723	0.000682093	0.00052747	0.000546867	0.000443913	0.00037705	0.000386333
	557.5	0.00142673	0.00138935	0.000840443	0.000838407	0.000727493	0.00048833	0.00051858	0.00040971	0.000338227	0.000395243
	558	0.00142483	0.0013886	0.00084127	0.000819693	0.000763163	0.00044553	0.000483147	0.000414743	0.00029669	0.000385873
	558.5	0.00141187	0.0014011	0.0008459	0.000790033	0.00080434	0.00046331	0.000462067	0.0004293	0.000259167	0.00039288
	559	0.00137463	0.0013698	0.000841597	0.000771463	0.000824533	0.00043985	0.000463413	0.00044608	0.00024038	0.000361247
	559.5	0.00132967	0.0013198	0.000836917	0.000760213	0.000818627	0.00042794	0.000466757	0.00047135	0.00021803	0.00033274
	560	0.0012931	0.00128225	0.000824837	0.000761967	0.000744707	0.00044644	0.000453137	0.000467623	0.000187373	0.000297303
	560.5	0.00125137	0.0012348	0.000826913	0.00074476	0.000652967	0.00042843	0.000437023	0.00043166	0.000179587	0.000259147
	561	0.0011857	0.00119385	0.000817503	0.000715117	0.000584523	0.00045255	0.00039892	0.00035629	0.000175513	0.000252367
	561.5	0.00112737	0.00113955	0.00080448	0.00067388	0.000552003	0.00047013	0.00039696	0.00029148	0.000159133	0.000251303
	562	0.00112703	0.0011209	0.000788393	0.000647497	0.00053031	0.0005018	0.000364997	0.000261143	0.00015025	0.00023394
	562.5	0.00116917	0.00114255	0.000758017	0.00064416	0.000530247	0.00049072	0.000351683	0.000255997	0.000176517	0.000242743
	563	0.00122817	0.0011807	0.000720693	0.00063926	0.00057131	0.00043676	0.000327543	0.000278783	0.000229967	0.000262873
	563.5	0.00122257	0.00117615	0.00071251	0.000651457	0.000623633	0.00039705	0.000318443	0.000305683	0.000258477	0.000306333
	564	0.00120053	0.00115945	0.000721113	0.000643427	0.00064433	0.00038038	0.000322473	0.000325787	0.000253047	0.000336103
	564.5	0.00115067	0.0011376	0.000731827	0.000646987	0.00061232	0.00040017	0.000349863	0.00033483	0.000167267	0.00030095
	565	0.00111237	0.0011169	0.000702033	0.000632607	0.00053893	0.0004249	0.000373223	0.00032914	9.55073e-05	0.00023864
	565.5	0.00110593	0.0010974	0.000664003	0.000622937	0.000474267	0.00044233	0.000359847	0.000340627	2.012e-05	0.000207187
	566	0.00109263	0.00104179	0.000648277	0.000619047	0.00046145	0.00049129	0.000321797	0.00033223	8.32533e-06	0.00021292
	566.5	0.00109267	0.00100907	0.00062937	0.00061361	0.000485053	0.00054128	0.000279267	0.000320807	1.87017e-05	0.000238957
	567	0.00108717	0.000996505	0.000598087	0.000594867	0.00054124	0.00057954	0.00025801	0.000297267	6.04703e-05	0.00025619
	567.5	0.00108823	0.00099958	0.000555797	0.000577617	0.000550677	0.00054182	0.000241863	0.000255883	0.000120727	0.000228067
	568	0.00107743	0.00099099	0.000525627	0.00057658	0.00054491	0.00044066	0.000195497	0.000232237	0.000142473	0.000188213
	568.5	0.0010489	0.000975325	0.00052433	0.00058929	0.00049622	0.00033517	0.000181543	0.000222437	0.000132663	0.000130483
	569	0.00105103	0.00098171	0.000527037	0.000580247	0.000430033	0.00028636	0.000179653	0.00020599	0.000126914	0.000116783
	569.5	0.00105752	0.00099793	0.00053533	0.000544797	0.00039538	0.00031823	0.000174963	0.000186517	0.00015334	0.000139473
	570	0.00108597	0.00100178	0.00052208	0.000519437	0.000347583	0.00037374	0.00016881	0.000163487	0.00017581	0.00020439
	570.5	0.00109893	0.0009906	0.00051884	0.000515323	0.000335727	0.00041322	0.00018725	0.000186047	0.000134677	0.00026616
	571	0.00110787	0.00099628	0.00049958	0.000521673	0.000288787	0.00038334	0.000235463	0.000225147	5.24243e-05	0.000295163
	571.5	0.00105357	0.000999865	0.000499163	0.000515203	0.00029156	0.00034031	0.00027248	0.000228527	2.27825e-05	0.000278193
	572	0.00097897	0.000963415	0.00049857	0.000493863	0.00029581	0.00032149	0.000274253	0.00019244	1.66915e-05	0.000273343
	572.5	0.00091086	0.000904705	0.00048347	0.000466513	0.000314763	0.00033761	0.00026452	0.000160617	8.0623e-06	0.00027339
	573	0.000895133	0.000859625	0.000467247	0.000438843	0.000286547	0.00034763	0.000259873	0.00019576	4.90307e-06	0.000284967
	573.5	0.000875597	0.000832525	0.000450293	0.00042203	0.00029258	0.00039392	0.000251763	0.000241387	1.4476e-05	0.000192273
	574	0.000849987	0.00081166	0.000457917	0.000411797	0.000282697	0.0004387	0.000238687	0.000277013	3.91323e-05	8.54517e-05
	574.5	0.00084139	0.000825075	0.000491157	0.00040687	0.000284567	0.0004399	0.000238867	0.000242437	4.92477e-05	2.3727e-05
	575	0.000839073	0.000841525	0.000500593	0.000400763	0.000286547	0.00035414	0.00023707	0.000166433	3.40364e-05	3.308e-05
	575.5	0.00082303	0.00084438	0.000494587	0.000387177	0.00027313	0.00021568	0.000202087	0.000114071	1.53322e-05	7.10957e-05
	576	0.00080576	0.000814485	0.000446123	0.000390157	0.000273683	0.00016764	0.000165163	6.67785e-05	1.33733e-05	0.000104893
	576.5	0.00080307	0.000786575	0.00039116	0.00039418	0.0002593	0.00019913	0.00012565	9.6498e-05	5.68967e-06	0.000157653
	577	0.00083858	0.00080172	0.000364723	0.000400787	0.000286	0.00026475	0.000115345	0.000128726	2.4631e-06	0.00016596
	577.5	0.0008583	0.000813125	0.000383613	0.000394163	0.00030369	0.00033396	0.000122655	0.000164293	0	0.000152077
	578	0.000865657	0.000803185	0.000449607	0.000382523	0.00030271	0.00037856	0.000130907	0.00017611	6.89993e-07	0.000150623
	578.5	0.000857863	0.00079165	0.00048063	0.000387617	0.000276663	0.00036604	0.0001489	0.00017308	2.73673e-06	0.00015659
	579	0.00084407	0.00078319	0.000458613	0.000401007	0.00026365	0.00028066	0.000190933	0.000164097	4.93567e-06	0.000149054
	579.5	0.000818553	0.00076735	0.00037922	0.000426493	0.00028655	0.00014434	0.000210873	0.000172197	1.89723e-07	8.2302e-05
	580	0.000822837	0.000773835	0.000343307	0.000437167	0.00030192	9.2839e-05	0.00021497	0.00016962	0	4.77537e-05
	580.5	0.000831183	0.000775315	0.000352033	0.000452743	0.00033176	0.00010129	0.000178753	0.000173283	0	2.40023e-05
	581	0.000850563	0.000807425	0.000395693	0.00044562	0.000337923	0.00014788	0.0001511	0.000165257	0	4.15717e-05
	581.5	0.000800297	0.00079496	0.000430313	0.000422263	0.000346237	0.00023137	0.000119562	0.000186193	6.20633e-07	6.69273e-05
	582	0.000725863	0.00075577	0.00041232	0.000369043	0.00036563	0.0003093	8.12057e-05	0.000208327	5.48967e-06	8.2004e-05
	582.5	0.000687327	0.000702465	0.000370963	0.000319007	0.000330903	0.0003596	7.75713e-05	0.000232263	1.6489e-05	9.97637e-05
	583	0.00071417	0.000677085	0.00031649	0.000290767	0.000282387	0.00034002	7.38013e-05	0.000204267	9.8829e-06	0.000147957
	583.5	0.000734187	0.000683335	0.000292437	0.00028479	0.000236307	0.00027847	9.88237e-05	0.000180083	5.72867e-06	0.000200443
	584	0.000780893	0.000719545	0.000280473	0.00030795	0.000229077	0.00020845	0.000114158	0.000152918	0	0.000247967
	584.5	0.000797343	0.000731325	0.00026107	0.00032897	0.00022145	0.00018437	0.000135467	0.000164442	3.02447e-06	0.000243607
	585	0.00085013	0.00076498	0.000245963	0.000346393	0.000194447	0.00014259	0.000167397	0.000140075	1.4815e-05	0.000228953
	585.5	0.000837063	0.000772665	0.000255293	0.000353747	0.00019449	0.00017328	0.000159077	0.000149013	2.44753e-05	0.000232877
	586	0.000784117	0.00075046	0.00026567	0.00034313	0.000220457	0.00018526	0.000168123	0.00010806	3.50534e-05	0.000210563
	586.5	0.00074382	0.000735555	0.000267693	0.00034335	0.00027101	0.00020167	0.000159786	9.40753e-05	3.08397e-06	0.000205967
	587	0.000729743	0.000732715	0.0002512	0.000337503	0.000295473	0.00015472	0.000180337	8.73943e-05	0	0.00020202
	587.5	0.000719587	0.00071745	0.000237317	0.0003252	0.000337583	0.00012951	0.000186647	9.89957e-05	0	0.000198333
	588	0.000713613	0.000685335	0.000231313	0.000308083	0.000339467	0.00012077	0.000167967	0.000130009	0	0.000194783
	588.5	0.000695133	0.000647425	0.000196123	0.000281783	0.000290153	0.00015661	0.000113644	0.000111481	0	0.00016201
	589	0.000728483	0.00066843	0.00018846	0.000265527	0.000244707	0.000173	4.84422e-05	7.43746e-05	2.7867e-06	0.000149042
	589.5	0.00071724	0.000655695	0.000211013	0.00026661	0.000231397	0.00022839	1.87457e-05	5.7858e-05	6.18433e-06	0.000140692
	590	0.000691357	0.00062514	0.000254183	0.000304697	0.000205833	0.00030893	2.50673e-05	5.70643e-05	0	0.000165249
	590.5	0.000654397	0.000584955	0.0002654	0.00033599	0.000157489	0.00036422	4.8478e-05	7.2979e-05	0	0.000194493
	591	0.000664053	0.000569715	0.000259883	0.000334103	0.000100372	0.00033705	7.7619e-05	0.000100162	0	0.0002047
	591.5	0.000709327	0.00058944	0.00023309	0.00029923	5.84067e-05	0.00029801	0.0001052	8.09233e-05	0	0.000185015
	592	0.000738203	0.00060204	0.000217937	0.000267423	6.91057e-05	0.00030163	0.000115871	9.80677e-05	0	0.000172254
	592.5	0.00072851	0.00062888	0.000193053	0.00029773	5.80835e-05	0.00033659	9.86943e-05	9.35483e-05	0	0.000162166
	593	0.000688493	0.000647295	0.000163264	0.000324843	7.1712e-05	0.00036317	8.22867e-05	0.000114103	0	0.00016926
	593.5	0.000684953	0.000679495	0.000133043	0.0003299	6.71857e-05	0.00030575	9.9078e-05	0.00012084	0	0.000140283
	594	0.000671157	0.000679835	0.000114265	0.000300107	0.000100931	0.00026182	0.000141163	0.00015402	0	0.000132513
	594.5	0.000647073	0.00062531	0.00011714	0.000270967	0.000160127	0.00023326	0.00018584	0.000189073	1.46713e-05	0.000122466
	595	0.00061549	0.00053669	0.000125718	0.00029036	0.000216423	0.00028752	0.000169207	0.000213117	1.86617e-05	0.00013406
	595.5	0.00059786	0.00049892	0.000147235	0.000307163	0.000219723	0.00034602	0.000156543	0.000227013	2.65073e-06	0.000142424
	596	0.00059111	0.0005315	0.000136734	0.00028833	0.000179177	0.00038588	0.000113886	0.000201943	0	0.000121226
	596.5	0.000586937	0.00059011	0.000129824	0.000260827	0.00016506	0.00033812	8.05083e-05	0.000207643	0	9.95537e-05
	597	0.000564497	0.000612315	0.000133989	0.00022816	0.00017449	0.00030357	5.1107e-05	0.000155283	0	8.2209e-05
	597.5	0.000527287	0.00055636	0.000182072	0.000214087	0.000204963	0.00026703	7.49267e-05	0.000146967	0	0.000102643
	598	0.000498327	0.000479095	0.000231253	0.000213147	0.000188027	0.00023558	9.2003e-05	0.000121215	0	0.000130525
	598.5	0.000491193	0.00044906	0.00024138	0.000238823	0.000161127	0.00021785	8.57237e-05	0.000138352	0	0.00014255
	599	0.000525027	0.000489395	0.000187446	0.000294077	0.000100894	0.00017166	4.60693e-05	0.000137131	0	0.000102196
	599.5	0.0005839	0.00055017	0.000131247	0.0003274	4.92667e-05	0.00014163	3.9616e-05	0.000123633	0	8.3475e-05
	600	0.000590697	0.000538675	0.00012681	0.000315553	1.46462e-05	0.00016209	6.60913e-05	0.000123547	0	0.000101645
	600.5	0.000594437	0.000514835	0.000142557	0.00027744	2.03241e-05	0.00020547	0.00013367	0.000128989	0	0.000151255
	601	0.000585333	0.00050303	0.000140145	0.000250017	9.80243e-05	0.00030287	0.000158093	0.000151909	0	0.00014716
	601.5	0.00058671	0.000504765	9.65128e-05	0.00020846	0.000141192	0.00030518	0.00017315	0.000158117	7.50633e-06	7.40257e-05
	602	0.00059494	0.00047805	8.9367e-05	0.00018286	0.000140766	0.0002378	0.000133678	0.000153623	3.41767e-06	2.01963e-05
	602.5	0.000601257	0.000480735	0.000100293	0.00016018	8.67573e-05	0.00015959	0.000100267	0.00016462	0	2.90473e-05
	603	0.000605913	0.000480075	0.000162255	0.00016553	7.6507e-05	0.0001111	8.79713e-05	0.00015452	0	4.529e-05
	603.5	0.0006409	0.000515435	0.00020598	0.00018025	6.11377e-05	0.0001093	8.70847e-05	0.000152048	0	6.69863e-05
	604	0.000608643	0.000477685	0.000254897	0.000189783	4.09567e-05	9.0681e-05	8.6375e-05	0.000130645	0	7.56153e-05
	604.5	0.000609073	0.000483775	0.00022379	0.000191617	3.98043e-05	0.0001212	6.51517e-05	0.000155277	0	3.20296e-05
	605	0.000583127	0.000493485	0.000152376	0.000210417	9.05713e-05	0.00022019	8.73703e-05	0.000189137	0	1.93163e-05
	605.5	0.00060322	0.000560085	9.24833e-05	0.00023244	0.000142767	0.00032392	0.000136783	0.000231703	0	3.90339e-05
	606	0.000620133	0.00061819	7.71144e-05	0.000237713	0.000133747	0.00032144	0.00018157	0.00023859	0	7.69553e-05
	606.5	0.00062467	0.00063662	9.13412e-05	0.000207013	7.9305e-05	0.00029424	0.00018521	0.000165813	0	9.96713e-05
	607	0.000616907	0.000628925	9.87993e-05	0.000171057	4.70607e-05	0.00027528	0.000176337	9.7479e-05	0	6.29942e-05
	607.5	0.000575243	0.000577845	8.12197e-05	0.000137245	4.45506e-06	0.00028908	0.000142035	5.27123e-05	0	3.61133e-05
	608	0.000519243	0.000484665	6.0318e-05	0.00014396	1.04623e-07	0.00026711	0.00013282	5.5429e-05	0	1.33873e-05
	608.5	0.00049158	0.00042071	3.69367e-05	0.000159243	7.195e-06	0.0002202	9.437e-05	5.29617e-05	0	4.26613e-05
	609	0.0004888	0.000417215	2.7087e-05	0.000175707	4.50029e-05	0.00017418	0.000131096	6.90377e-05	0	7.34893e-05
	609.5	0.00054889	0.000517775	2.30797e-05	0.000185383	0.000117589	0.00014765	0.000139726	0.00012778	0	9.5323e-05
	610	0.00058785	0.000609215	2.77097e-05	0.00020438	0.000123344	0.00011063	9.02183e-05	0.000196157	0	0.000117993
	610.5	0.000608893	0.000652665	3.72433e-05	0.000212193	7.05643e-05	9.8689e-05	8.61753e-06	0.000217997	3.57733e-06	0.000107395
	611	0.000613367	0.000688315	4.07033e-05	0.00020868	3.73059e-05	8.202e-05	4.91663e-06	0.000178567	4.589e-06	9.6775e-05
	611.5	0.000623713	0.00068789	3.574e-05	0.00018629	6.8683e-05	0.00012759	8.29003e-05	0.000139548	1.3084e-05	6.80833e-05
	612	0.000627783	0.000662295	3.24367e-05	0.000167783	9.20267e-05	0.00016046	0.000166707	7.76663e-05	0	6.4762e-05
	612.5	0.000586697	0.000564045	3.768e-05	0.000152837	0.000122697	0.00022914	0.00017296	3.3098e-05	0	2.9431e-05
	613	0.000521423	0.000446245	5.83533e-05	0.000151613	0.00012455	0.00025882	0.000138157	1.97869e-05	0	9.1428e-07
	613.5	0.000500917	0.000409745	6.36771e-05	0.00014511	0.00015951	0.00033126	0.000123801	4.84027e-05	0	0
	614	0.000507983	0.000428565	6.17667e-05	0.00013915	0.00016284	0.00038676	0.000142024	9.76207e-05	0	2.28633e-06
	614.5	0.000501037	0.000430855	6.72133e-05	0.000118176	0.000175007	0.00039502	0.000121833	0.000128197	0	6.5596e-05
	615	0.000513747	0.00044378	7.62104e-05	0.000127059	0.000174023	0.00031682	9.49897e-05	0.000112453	0	0.000149256
	615.5	0.00050444	0.000444205	8.55011e-05	0.000165043	0.000163812	0.00019885	7.612e-05	9.76657e-05	0	0.000192223
	616	0.000547467	0.00052766	0.000111991	0.000193107	0.000155774	0.00011851	6.88737e-05	0.000124676	6.70077e-06	0.000160952
	616.5	0.000571273	0.00058419	0.000147795	0.00021413	9.69295e-05	7.0909e-05	6.853e-05	0.000149387	4.0912e-05	0.000132329
	617	0.000599607	0.000581625	0.000163702	0.000255287	8.45113e-05	2.6533e-05	5.86953e-05	0.000139366	1.02694e-05	0.000100459
	617.5	0.000560273	0.00050344	0.000138968	0.00027668	4.99937e-05	5.3486e-05	7.22462e-05	9.0201e-05	0	0.000133583
	618	0.000528587	0.000451725	0.000110184	0.00027265	5.96697e-05	0.00013687	8.61957e-05	0.000108154	0	0.00012457
	618.5	0.000514383	0.000464145	9.31779e-05	0.000236663	6.46513e-05	0.0002901	0.000120735	0.000129806	0	9.95283e-05
	619	0.000539683	0.00053327	7.08803e-05	0.00021455	7.11243e-05	0.00040723	0.000115316	0.000145562	0	6.50557e-05
	619.5	0.00047601	0.00049931	5.27733e-05	0.00021636	0.000103808	0.00046526	0.000109437	0.00013299	0	7.4679e-05
	620	0.00041127	0.00043328	5.569e-05	0.00021942	0.000149227	0.00048138	0.000104701	0.000109164	0	7.49175e-05
	620.5	0.00036307	0.000354395	6.54133e-05	0.000219653	0.00020225	0.00044593	8.394e-05	0.000125786	0	8.05147e-05
	621	0.000363913	0.000326715	7.192e-05	0.000236627	0.000228663	0.00035986	0.000123496	0.000116168	0	4.59239e-05
	621.5	0.00041767	0.00036844	7.48333e-05	0.000267667	0.00021921	0.00028813	0.000165277	5.91857e-05	0	5.829e-05
	622	0.000448013	0.000419805	6.70867e-05	0.000278113	0.000180797	0.00019367	0.00025553	1.13604e-05	3.97567e-06	4.09032e-05
	622.5	0.000510327	0.00050153	7.257e-05	0.000275333	0.000159698	0.00014237	0.00025909	1.03057e-05	1.0447e-05	2.00307e-05
	623	0.000540513	0.000538345	6.79433e-05	0.000243937	0.000167657	0.0001001	0.000205457	1.32057e-05	1.05983e-05	1.5967e-05
	623.5	0.000536403	0.00052512	6.802e-05	0.000224177	0.000216993	9.1191e-05	9.17437e-05	1.1207e-05	7.414e-06	5.54723e-05
	624	0.000532013	0.0005289	5.26567e-05	0.000254173	0.000265392	0.00011909	3.5186e-05	3.8217e-06	0	0.00015963
	624.5	0.000522567	0.00051104	3.01953e-05	0.00026792	0.000238107	0.00015807	1.69967e-05	3.6465e-05	0	0.000209767
	625	0.000536933	0.000562945	8.983e-06	0.000242343	0.000229737	0.00022245	3.26743e-05	0.00010121	0	0.000192353
	625.5	0.000519147	0.000580365	1.42743e-06	0.000180693	0.000177183	0.00022222	7.10983e-05	0.000177607	0	0.00014524
	626	0.00052572	0.00059861	6.34533e-06	0.000118462	0.00014106	0.00020892	0.000100476	0.000204967	0	9.91523e-05
	626.5	0.000548687	0.000598195	2.8857e-05	0.000118877	0.000139591	0.00016155	0.000165115	0.000193723	0	9.2702e-05
	627	0.000586287	0.00057762	4.62667e-05	0.000136957	0.000120224	0.00017459	0.00019168	0.000185493	8.849e-08	8.09303e-05
	627.5	0.000534757	0.000521065	5.492e-05	0.00019245	0.000225777	0.00020723	0.000225453	0.000137887	7.95667e-06	0.000104328
	628	0.000514737	0.000487355	4.74667e-05	0.000217017	0.000257137	0.00035519	0.00022726	0.000110709	2.92703e-05	8.00481e-05
	628.5	0.000513203	0.00049663	3.12873e-05	0.00023049	0.00026414	0.00047048	0.000220187	9.3717e-05	4.30433e-05	7.51567e-05
	629	0.00050161	0.000507435	4.37433e-05	0.000227527	0.000223703	0.00053182	0.00023853	0.000188007	5.20063e-05	0.000101947
	629.5	0.000506937	0.000530275	5.76814e-05	0.00027033	0.000225747	0.00049042	0.000243583	0.000252497	6.69352e-05	0.000170647
	630	0.000523403	0.00052445	8.63897e-05	0.000318007	0.000317843	0.00043562	0.000253667	0.000237003	3.80327e-05	0.00022074
	630.5	0.000529653	0.000523695	9.10719e-05	0.000344163	0.000375223	0.00045629	0.000213333	0.000189997	1.01324e-05	0.000249377
	631	0.000498097	0.0005227	0.000122382	0.00033597	0.000357947	0.00044416	0.000122178	0.000183447	6.73367e-06	0.000222233
	631.5	0.000455287	0.00052903	0.000136958	0.000322603	0.00030297	0.00040632	8.3308e-05	0.000193383	3.475e-06	0.000208767
	632	0.000449497	0.000539305	0.000130096	0.000348163	0.00024946	0.0003352	7.07963e-05	0.000202243	6.96833e-06	0.000182173
	632.5	0.000429893	0.00051599	0.000105839	0.00038564	0.000246683	0.00031701	0.000114743	0.000183423	2.946e-07	0.000191953
	633	0.000454953	0.00056578	9.70467e-05	0.00042523	0.00025375	0.00033172	0.000154777	0.000211077	0	0.000214623
	633.5	0.00051568	0.0006344	0.000100223	0.000427333	0.00031651	0.00040967	0.000193387	0.00021658	0	0.000212393
	634	0.000589283	0.000723745	0.000107137	0.000409683	0.000385317	0.00053225	0.000236077	0.00020183	2.4794e-06	0.000155379
	634.5	0.000572967	0.000697095	0.000128607	0.0003756	0.000394553	0.00069982	0.000286247	0.000189468	2.31847e-05	0.0001492
	635	0.000552697	0.000675925	0.000198016	0.00038814	0.000307357	0.0007689	0.0003494	0.00018425	4.54656e-05	0.000156192
	635.5	0.000552873	0.000694725	0.000291207	0.000449923	0.000200373	0.00077855	0.000411427	0.000201703	0.000115258	0.000250407
	636	0.00058949	0.000745105	0.00031116	0.00049244	0.00016868	0.00069799	0.000442617	0.000237287	0.000130524	0.000282547
	636.5	0.0006487	0.00081108	0.000249153	0.00049152	0.000126246	0.000714	0.000443053	0.00024934	8.84313e-05	0.00025549
	637	0.000701573	0.00082996	0.000179235	0.00046247	0.000119056	0.00073951	0.000422483	0.000285933	6.98347e-05	0.000263203
	637.5	0.000690187	0.000804245	0.000140348	0.000483327	0.000147605	0.00069288	0.00042541	0.000300617	0.000105863	0.00029549
	638	0.000648543	0.000797485	0.000154119	0.000511637	0.000290387	0.00064393	0.00050668	0.000309247	0.000150021	0.000368617
	638.5	0.000581853	0.000776225	0.000166277	0.000524777	0.000424623	0.00062577	0.000579177	0.000340353	0.000216433	0.000378357
	639	0.000582617	0.00080148	0.000182154	0.00055919	0.00051083	0.00076983	0.000565147	0.000366793	0.000258177	0.000336807
	639.5	0.000617587	0.000793615	0.000247872	0.000615947	0.000548973	0.00093145	0.000485347	0.00044778	0.000356083	0.000320813
	640	0.00068732	0.00083113	0.00028046	0.000675583	0.000622217	0.0010883	0.00042791	0.000448433	0.000448223	0.000355123
	640.5	0.000748747	0.0008781	0.000327023	0.00068333	0.000640617	0.0011165	0.000480937	0.000464773	0.00049123	0.000429527
	641	0.000722807	0.00090611	0.00033631	0.00066518	0.0007187	0.0010684	0.00059341	0.000446323	0.000503967	0.00050308
	641.5	0.00069124	0.000952395	0.000344207	0.000674067	0.000802793	0.0010179	0.00067637	0.000499763	0.000505187	0.00054149
	642	0.000614287	0.000926725	0.000362547	0.000706023	0.000947583	0.0010985	0.00073812	0.00062041	0.000494093	0.00055697
	642.5	0.00064322	0.000967475	0.00038453	0.000766673	0.000979743	0.0011363	0.000786847	0.000751743	0.000453117	0.00056816
	643	0.000691387	0.00098648	0.000475033	0.00084628	0.00094287	0.0011009	0.000866107	0.000862733	0.000444957	0.00061185
	643.5	0.00086534	0.0011304	0.000554207	0.000964553	0.000920263	0.001047	0.000900703	0.000889257	0.000563397	0.000669203
	644	0.00098307	0.00122825	0.000608477	0.0010931	0.00099941	0.0011494	0.000943817	0.000930623	0.000667413	0.000683493
	644.5	0.0010519	0.0013171	0.000624407	0.00117563	0.0011151	0.0012879	0.00100451	0.000975623	0.000732033	0.00068269
	645	0.00102294	0.0013436	0.000678157	0.00125107	0.0012206	0.0013993	0.00109117	0.000984213	0.00078747	0.00069344
	645.5	0.00102558	0.00139765	0.000764833	0.00133053	0.00129303	0.0014518	0.00115943	0.00099904	0.000883703	0.000752607
	646	0.00104752	0.00143675	0.000851987	0.00147373	0.0014173	0.0015002	0.00123923	0.00103265	0.00097198	0.000842327
	646.5	0.00110273	0.0015147	0.000964137	0.00158407	0.0015645	0.001651	0.00133253	0.00112757	0.00095074	0.000934463
	647	0.0010811	0.0015548	0.00104774	0.00163183	0.00177293	0.0019331	0.00142783	0.0011996	0.000957657	0.00106248
	647.5	0.000989457	0.0015368	0.00116906	0.0016653	0.00191927	0.0022266	0.00147613	0.00127313	0.000999753	0.0011467
	648	0.000905573	0.0015141	0.00129213	0.00174957	0.00203837	0.0024151	0.00152153	0.00138063	0.0010911	0.00121163
	648.5	0.00095231	0.00160105	0.00138933	0.00190047	0.00218343	0.0024617	0.0016279	0.0014789	0.0012573	0.00121493
	649	0.00105592	0.00174935	0.00145863	0.00200163	0.0023294	0.0024576	0.00173883	0.00152033	0.0014307	0.0012072
	649.5	0.00125057	0.0019491	0.0014752	0.0021124	0.00246053	0.0025556	0.00184223	0.00151757	0.00159697	0.00122733
	650	0.00136233	0.00210805	0.00154293	0.0022114	0.0025428	0.0026544	0.0018904	0.0015773	0.00166367	0.00126503
	650.5	0.00151313	0.0022828	0.00166967	0.0023757	0.00269117	0.002834	0.00196997	0.00173883	0.00173687	0.0012671
	651	0.00157223	0.0023948	0.0017715	0.00249657	0.00281887	0.0028902	0.00209553	0.0019364	0.00178737	0.00126953
	651.5	0.0016436	0.0025044	0.0018853	0.00261817	0.0029551	0.003066	0.00224307	0.00206717	0.00190573	0.00135263
	652	0.00166087	0.00257285	0.00195397	0.00276897	0.00301847	0.0032389	0.0024055	0.00218777	0.00203247	0.00151193
	652.5	0.00161673	0.00253815	0.00202497	0.00295863	0.00314233	0.0034158	0.00255433	0.0022976	0.00228777	0.0016923
	653	0.00162307	0.00254565	0.00205767	0.00312187	0.00324787	0.0035197	0.0026705	0.0024022	0.00250747	0.0018043
	653.5	0.00167257	0.00261245	0.0021342	0.00321703	0.00349507	0.0036517	0.00280403	0.00249993	0.0027152	0.0018775
	654	0.00175453	0.0027956	0.0022519	0.00333867	0.0037156	0.0038892	0.00293957	0.00259613	0.0027888	0.00198747
	654.5	0.00181717	0.0029401	0.00242903	0.00349197	0.00393603	0.0040793	0.00310937	0.0027584	0.00283547	0.00211177
	655	0.00182727	0.003045	0.00260197	0.00370833	0.0040596	0.0042086	0.003219	0.0028946	0.00286853	0.00219017
	655.5	0.00189663	0.0032283	0.00280137	0.00392217	0.00421047	0.0042507	0.00332333	0.00308497	0.00295987	0.00221197
	656	0.00199497	0.00343635	0.00297353	0.00413107	0.00435567	0.0043336	0.00338237	0.00323103	0.00317977	0.00224997
	656.5	0.0021863	0.00371245	0.0031206	0.00435923	0.00447737	0.0044885	0.00348483	0.0033631	0.00335737	0.00239513
	657	0.00234253	0.00385585	0.00325513	0.00456363	0.00466327	0.0047745	0.00369693	0.00349523	0.003506	0.00247423
	657.5	0.00243463	0.00393745	0.00340597	0.00475723	0.00501213	0.0050709	0.00400147	0.00369987	0.00361867	0.00255197
	658	0.0025078	0.00405975	0.0035888	0.00494093	0.00541963	0.00543	0.0043472	0.0039553	0.00382643	0.0026279
	658.5	0.00256523	0.00426165	0.00375003	0.00520713	0.00577507	0.0056939	0.00461623	0.00414783	0.00408907	0.00273667
	659	0.00263623	0.00448625	0.00395677	0.0055353	0.00598353	0.0060084	0.00483393	0.0042524	0.00433823	0.0028879
	659.5	0.0026854	0.0046046	0.00416403	0.00586117	0.0062247	0.0062871	0.0049866	0.0043789	0.00453947	0.0030994
	660	0.00281547	0.0047774	0.00444667	0.00614287	0.00651627	0.0066444	0.0051867	0.0045582	0.0048378	0.00335347
	660.5	0.00296383	0.00500355	0.00472647	0.006432	0.00688793	0.0070165	0.00539097	0.0048576	0.00511557	0.00351617
	661	0.0032073	0.00542035	0.0050091	0.00672903	0.0073423	0.0074403	0.0056523	0.00515507	0.00544597	0.00356637
	661.5	0.00338773	0.0058207	0.00533617	0.0071147	0.00780123	0.0078691	0.005938	0.00548263	0.0057381	0.00369507
	662	0.00357533	0.0062299	0.00568753	0.00764507	0.0082628	0.0082843	0.0063883	0.0057684	0.0060985	0.0038945
	662.5	0.0036882	0.00658	0.00605233	0.00827123	0.00873847	0.0086476	0.0068791	0.00613257	0.00649257	0.00415653
	663	0.00389093	0.0069564	0.00642463	0.00886423	0.0093283	0.0090879	0.00736613	0.0065246	0.0069322	0.0043956
	663.5	0.00418233	0.00740165	0.0068354	0.00936247	0.0100627	0.0096722	0.0077806	0.00694853	0.00737047	0.00463573
	664	0.00450157	0.00790145	0.00734177	0.00986097	0.010779	0.01036	0.00815933	0.00736137	0.00784167	0.00487177
	664.5	0.00477297	0.00843645	0.00782487	0.0104533	0.0114043	0.011033	0.00856287	0.007696	0.0082248	0.00508547
	665	0.00502957	0.00892855	0.00834047	0.011071	0.0119353	0.011677	0.0090153	0.00807413	0.00858513	0.0053019
	665.5	0.0054037	0.00945635	0.00886073	0.0117567	0.0124847	0.012255	0.0095224	0.00844457	0.00895837	0.005594
	666	0.00584213	0.0100223	0.00944113	0.012444	0.0132087	0.012826	0.0100955	0.0088818	0.00947547	0.00593347
	666.5	0.00618183	0.0105421	0.0100492	0.0132007	0.0140653	0.013375	0.0106953	0.00933093	0.0100707	0.006358
	667	0.0063407	0.0109502	0.0106322	0.013932	0.0149813	0.014128	0.011306	0.009766	0.0106443	0.00678517
	667.5	0.00648733	0.0114235	0.011223	0.0147697	0.015797	0.015022	0.0119167	0.0102693	0.0112463	0.00721737
	668	0.00684817	0.012057	0.0117767	0.015622	0.0166317	0.015991	0.0125553	0.0107927	0.0118193	0.00762347
	668.5	0.00734083	0.0127745	0.0123983	0.0164907	0.017598	0.016819	0.0131923	0.011449	0.01247	0.0080369
	669	0.0078923	0.013544	0.013093	0.0173377	0.0186567	0.017587	0.013839	0.0121253	0.0131337	0.00840703
	669.5	0.00824877	0.0142535	0.013846	0.0182217	0.0197457	0.018273	0.0145147	0.0127607	0.013803	0.008761
	670	0.00860577	0.014931	0.0146093	0.019129	0.0207387	0.019045	0.0152847	0.0133073	0.0143857	0.00911877
	670.5	0.0090003	0.01561	0.0153953	0.0200583	0.021657	0.019907	0.0161093	0.0138553	0.014927	0.00952607
	671	0.00957603	0.016476	0.016173	0.0210243	0.0226023	0.020849	0.0169113	0.014561	0.0155857	0.00999527
	671.5	0.0100957	0.0173385	0.0169283	0.0220727	0.023638	0.021784	0.017745	0.015312	0.016351	0.0103965
	672	0.010572	0.018228	0.0176973	0.0232137	0.024809	0.022856	0.0185657	0.0159963	0.0171453	0.0108037
	672.5	0.0110707	0.0191675	0.0184503	0.0243177	0.0259467	0.023838	0.0193657	0.0166807	0.017885	0.011227
	673	0.011675	0.0202235	0.0192707	0.0254233	0.027141	0.024834	0.0201683	0.0174153	0.018725	0.0117303
	673.5	0.012211	0.021167	0.0201317	0.026557	0.0284087	0.025713	0.02107	0.018302	0.0197117	0.012369
	674	0.0126913	0.022027	0.021093	0.0277847	0.0297913	0.026908	0.0221167	0.019122	0.020761	0.0129453
	674.5	0.0131627	0.0228895	0.0221243	0.0290933	0.0312697	0.02827	0.023228	0.0199653	0.021813	0.0136013
	675	0.0136547	0.0238305	0.023135	0.0304027	0.0327833	0.029805	0.0242667	0.0208703	0.0228417	0.0142043
	675.5	0.0142067	0.0248915	0.0242423	0.031895	0.034324	0.031217	0.025387	0.0218847	0.023882	0.0148853
	676	0.014848	0.0260655	0.025315	0.0334423	0.03589	0.032617	0.026546	0.0230223	0.0248937	0.015508
	676.5	0.0155863	0.027332	0.0264603	0.034997	0.0375073	0.034125	0.0278097	0.024094	0.0259967	0.016154
	677	0.0163273	0.028628	0.0276787	0.0365343	0.0390807	0.03572	0.029105	0.0250887	0.0272107	0.0168217
	677.5	0.017069	0.02997	0.0289613	0.03813	0.0407373	0.03741	0.0303747	0.0260293	0.0284437	0.0175547
	678	0.017817	0.03127	0.030272	0.039753	0.0424203	0.038928	0.031644	0.0270647	0.0294827	0.018392
	678.5	0.018561	0.0324645	0.031501	0.0412873	0.0442357	0.040425	0.0327683	0.0282347	0.03055	0.0192323
	679	0.019219	0.0335515	0.032744	0.0427437	0.0459217	0.041733	0.0339417	0.0294073	0.0317467	0.0199727
	679.5	0.019811	0.0345675	0.0338593	0.044214	0.0476463	0.043219	0.0352297	0.0305133	0.033172	0.0206143
	680	0.0203397	0.035596	0.03493	0.0456833	0.0490573	0.044684	0.036573	0.0315737	0.034518	0.021342
	680.5	0.020911	0.036601	0.035815	0.0469933	0.0503613	0.046193	0.037759	0.0326	0.0356153	0.0221677
	681	0.0214543	0.037605	0.0366803	0.048145	0.0515067	0.047475	0.0388433	0.0336193	0.0366057	0.0229603
	681.5	0.0218843	0.038486	0.0374387	0.049093	0.0527017	0.04863	0.039884	0.034496	0.037557	0.0236007
	682	0.022193	0.0392125	0.038012	0.0498833	0.0537693	0.04962	0.0408273	0.0351557	0.0383963	0.023965
	682.5	0.022418	0.039628	0.0384227	0.0505053	0.0545807	0.050494	0.0415563	0.035728	0.0391187	0.0242797
	683	0.022528	0.03977	0.03873	0.051042	0.0551803	0.051194	0.0421727	0.0363783	0.0395897	0.0246233
	683.5	0.022467	0.039797	0.0389613	0.0514363	0.0556093	0.051691	0.0427883	0.0370457	0.0400667	0.0250827
	684	0.0223367	0.039859	0.03908	0.051742	0.0560217	0.051977	0.0433113	0.0375457	0.0404843	0.0255243
	684.5	0.022201	0.0398815	0.0390073	0.0517603	0.0562317	0.052151	0.043647	0.0379303	0.0408777	0.0259047
	685	0.0219817	0.039595	0.038747	0.0515207	0.055986	0.052189	0.0437407	0.038181	0.041095	0.0261327
	685.5	0.0217617	0.039135	0.038423	0.0511093	0.0554677	0.052312	0.043734	0.038269	0.0411813	0.0262537
	686	0.0214613	0.0384845	0.0379343	0.050639	0.054881	0.052561	0.0436377	0.038246	0.0412807	0.026403
	686.5	0.0210943	0.0377465	0.0373217	0.0500447	0.0542723	0.052709	0.0433933	0.038228	0.0412433	0.0264393
	687	0.020515	0.0368415	0.0364517	0.0492237	0.0535573	0.052532	0.0431363	0.0382113	0.040948	0.0264177
	687.5	0.0198687	0.0359595	0.035614	0.048153	0.0527003	0.051992	0.042779	0.038021	0.0404457	0.0262247
	688	0.0192537	0.035148	0.034769	0.0470343	0.0516493	0.051365	0.0423643	0.037736	0.0399173	0.0261917
	688.5	0.0187063	0.0343125	0.0338353	0.0458803	0.0504703	0.050548	0.0418137	0.0373267	0.0394187	0.0261647
	689	0.0181767	0.0332195	0.0327773	0.0447977	0.0493533	0.049663	0.0412557	0.0367897	0.0388467	0.0261753
	689.5	0.0175627	0.0320545	0.0317093	0.0435997	0.0482807	0.048817	0.04066	0.0363247	0.0382513	0.0260993
	690	0.017015	0.031129	0.0307503	0.0424217	0.0471073	0.048075	0.03996	0.0358987	0.037653	0.025918
	690.5	0.0164113	0.030273	0.0297787	0.0412947	0.0458043	0.047309	0.0393407	0.0354517	0.0371617	0.025682
	691	0.015902	0.029441	0.0288107	0.0402433	0.0446843	0.046514	0.0387723	0.034883	0.036732	0.0254383
	691.5	0.0152547	0.028379	0.0279117	0.039149	0.043701	0.045702	0.0381417	0.0343957	0.0361983	0.0251773
	692	0.0145953	0.0273435	0.0270793	0.0380457	0.0427913	0.045054	0.037373	0.0339747	0.0356	0.024963
	692.5	0.0139787	0.0262215	0.0262947	0.0369267	0.041821	0.04446	0.036686	0.0335243	0.0348673	0.024724
	693	0.013562	0.025318	0.0255207	0.035856	0.0408197	0.044053	0.0360577	0.0329973	0.0341733	0.024525
	693.5	0.0131267	0.024488	0.0247563	0.034852	0.0396523	0.043525	0.035586	0.0323943	0.0334957	0.0242937
	694	0.0124943	0.02361	0.023983	0.0338893	0.038488	0.042882	0.035059	0.0317967	0.0329887	0.0240273
	694.5	0.0118623	0.0227285	0.0232377	0.0329573	0.0374577	0.04217	0.0346193	0.0313147	0.0325737	0.0238257
	695	0.0114647	0.0220045	0.022547	0.0321003	0.0366637	0.041348	0.0341413	0.0310073	0.032118	0.0237207
	695.5	0.0111827	0.0213885	0.0219117	0.031251	0.0360273	0.04046	0.0336347	0.030792	0.0316833	0.0236547
	696	0.010803	0.0206715	0.0212753	0.030461	0.0353407	0.039561	0.033083	0.030503	0.0313107	0.0234037
	696.5	0.010478	0.020007	0.0207173	0.0296663	0.0346267	0.038723	0.032469	0.0300937	0.0311067	0.023135
	697	0.0101873	0.019439	0.020212	0.0289923	0.033827	0.03803	0.031928	0.0296117	0.0306027	0.022878
	697.5	0.0100031	0.0190435	0.0197137	0.0281997	0.0330867	0.037429	0.0313663	0.029094	0.0300007	0.0227177
	698	0.00972487	0.018665	0.0191457	0.0275003	0.032416	0.036958	0.030892	0.028662	0.029306	0.0225053
	698.5	0.00941253	0.018223	0.0185427	0.0268163	0.0318253	0.036506	0.0304527	0.0282973	0.0288687	0.022363
	699	0.00908237	0.017689	0.017939	0.0262843	0.0313593	0.036055	0.029981	0.0280667	0.0284827	0.0221793
	699.5	0.00885197	0.0171865	0.0174707	0.025718	0.0307623	0.035584	0.02944	0.0278537	0.0282163	0.0220373
	700	0.00866193	0.0166755	0.0170547	0.0252217	0.0301733	0.035076	0.0289243	0.0276307	0.0279843	0.0218433
	700.5	0.00842573	0.016209	0.016769	0.024762	0.029512	0.034645	0.0285953	0.0273573	0.0277413	0.0218007
	701	0.00814213	0.015755	0.0164303	0.0243153	0.028899	0.034181	0.0284143	0.0270507	0.027367	0.0217557
	701.5	0.00794687	0.015382	0.016088	0.0238337	0.0281887	0.033541	0.0282407	0.0266577	0.026965	0.0216747
	702	0.0077712	0.015002	0.0157367	0.02335	0.0275467	0.032937	0.0279753	0.0262823	0.0265343	0.0214233
	702.5	0.0076988	0.0147175	0.0154537	0.0228823	0.027007	0.032461	0.0276647	0.0259303	0.0262603	0.0213163
	703	0.00767403	0.0145195	0.0152943	0.0224733	0.0265387	0.032195	0.0273293	0.025614	0.02607	0.0213467
	703.5	0.00762907	0.014295	0.0149543	0.0220967	0.0262363	0.031842	0.0269123	0.0252483	0.026011	0.0212933
	704	0.0073927	0.0139505	0.0146107	0.0217373	0.0259647	0.031453	0.0264857	0.0249863	0.0258573	0.0211043
	704.5	0.00713783	0.0136285	0.0141583	0.0213287	0.0257143	0.030868	0.0261363	0.0248047	0.025694	0.0209763
	705	0.0068294	0.0133035	0.0138527	0.0208967	0.02526	0.030443	0.0259627	0.0246643	0.0254547	0.0209387
	705.5	0.00662453	0.0130755	0.0134773	0.020425	0.0247813	0.030252	0.0257487	0.0244377	0.0249943	0.0207857
	706	0.0064403	0.0127135	0.0131993	0.0200833	0.024384	0.030244	0.0255217	0.024081	0.024662	0.0205777
	706.5	0.00632977	0.0123495	0.0130233	0.0197993	0.024182	0.030097	0.025209	0.023724	0.0244307	0.02051
	707	0.0062859	0.0121575	0.012861	0.019542	0.023949	0.029754	0.0249603	0.0235963	0.024327	0.0205567
	707.5	0.00635247	0.012266	0.012658	0.0192487	0.0238	0.029359	0.0248213	0.023611	0.0241577	0.0204927
	708	0.0063441	0.012274	0.0124143	0.019062	0.0235027	0.028897	0.0246953	0.0235047	0.0240687	0.0203163
	708.5	0.00629713	0.012093	0.0122477	0.01898	0.023131	0.028498	0.0244977	0.0232327	0.0239853	0.0201237
	709	0.00624057	0.011881	0.0121663	0.0188953	0.022763	0.028287	0.024256	0.0231033	0.0238817	0.020139
	709.5	0.0063124	0.011904	0.0120923	0.0186477	0.0225367	0.028069	0.0239897	0.022967	0.0237047	0.0201757
	710	0.00633057	0.011985	0.0120323	0.0183217	0.0224507	0.027897	0.0237707	0.022843	0.023526	0.0202067
	710.5	0.00628613	0.0119225	0.0119573	0.0181013	0.022352	0.027694	0.0235807	0.0226157	0.023298	0.0200863
	711	0.0061279	0.0116285	0.0118283	0.0179983	0.0221973	0.027493	0.0235753	0.0224657	0.0232133	0.019948
	711.5	0.00597943	0.0113329	0.0117697	0.0179657	0.0219343	0.027262	0.023599	0.0223423	0.0231697	0.0198993
	712	0.00594263	0.0112721	0.0117367	0.01783	0.02174	0.027164	0.0235797	0.0223327	0.0232257	0.019935
	712.5	0.0059677	0.0112878	0.011751	0.0177077	0.0215623	0.027214	0.0235	0.0223943	0.0232463	0.019876
	713	0.0058557	0.0111316	0.0116263	0.0175993	0.0214883	0.027261	0.0233993	0.022437	0.0232423	0.0197153
	713.5	0.0056512	0.0109058	0.0115017	0.017511	0.0212247	0.027322	0.023223	0.0223287	0.0232103	0.0196967
	714	0.00551023	0.0108137	0.0113787	0.0174177	0.021052	0.027414	0.0232027	0.0222993	0.023076	0.0198063
	714.5	0.00540703	0.0107902	0.0112643	0.0173947	0.0208603	0.027625	0.023222	0.022265	0.0228917	0.0198973
	715	0.005384	0.0107386	0.011172	0.017434	0.0207697	0.027668	0.0231933	0.0222827	0.022686	0.019945
	715.5	0.00537803	0.0106484	0.0112063	0.017415	0.0208093	0.027471	0.0230067	0.0221413	0.0228337	0.0200733
	716	0.00537933	0.0106458	0.0112587	0.0173037	0.020886	0.026928	0.0228133	0.022004	0.0230297	0.0200623
	716.5	0.00534883	0.0106497	0.0112587	0.0172023	0.020983	0.026483	0.022817	0.0219257	0.023309	0.0200157
	717	0.00542473	0.0107181	0.0112207	0.0171707	0.0209533	0.026391	0.022918	0.0219263	0.0233517	0.020107
	717.5	0.00549453	0.0106523	0.011151	0.017186	0.0209467	0.026587	0.0231037	0.0220497	0.023394	0.020299
	718	0.00551893	0.0106342	0.011115	0.0171567	0.0209377	0.026903	0.0231443	0.022256	0.0233017	0.0204177
	718.5	0.0055022	0.0106182	0.011126	0.0171827	0.020929	0.027006	0.0229927	0.0224143	0.0231117	0.0203387
	719	0.0055615	0.0107417	0.011171	0.0171657	0.021163	0.027012	0.0228553	0.022526	0.0229173	0.0202797
	719.5	0.0055655	0.0107559	0.0110288	0.0170477	0.0214547	0.026794	0.0228527	0.0224383	0.0226947	0.0202737
	720	0.00561133	0.010895	0.0108123	0.0169423	0.0215403	0.026721	0.022958	0.0223777	0.0227273	0.020216
	720.5	0.0056438	0.0109874	0.0106133	0.0168723	0.0213157	0.026725	0.023028	0.0222113	0.022853	0.020272
	721	0.005608	0.0109327	0.0106653	0.0168757	0.020959	0.026857	0.0231687	0.022173	0.0230213	0.0202473
	721.5	0.00549137	0.0107174	0.0108416	0.0168963	0.020896	0.026917	0.0232473	0.0220637	0.023103	0.0203627
	722	0.00531793	0.0105488	0.011078	0.0169507	0.0208743	0.027121	0.023291	0.021844	0.0231753	0.0202793
	722.5	0.00516887	0.0104966	0.0111957	0.01704	0.0209737	0.027401	0.023271	0.021807	0.023336	0.0203613
	723	0.00518313	0.0105834	0.0112	0.017063	0.0209643	0.027568	0.023324	0.02192	0.0234633	0.0204867
	723.5	0.005283	0.0105925	0.0110117	0.0170873	0.021097	0.027431	0.0233343	0.0221447	0.0234783	0.020601
	724	0.00543543	0.0106153	0.0107993	0.0170863	0.021232	0.027107	0.0232193	0.022211	0.0234587	0.020602
	724.5	0.00541947	0.0105152	0.0106392	0.0171317	0.021249	0.026983	0.0230463	0.0223137	0.0233923	0.020676
	725	0.00540443	0.0105618	0.010745	0.0172757	0.0212273	0.026999	0.0229163	0.0223533	0.0233567	0.0207133
	725.5	0.00536037	0.010631	0.0110166	0.0173023	0.0211183	0.027221	0.0230123	0.0224797	0.0233723	0.0206843
	726	0.0055187	0.0108395	0.011168	0.017213	0.0211647	0.027349	0.0233803	0.022589	0.02347	0.020566
	726.5	0.00553787	0.0108691	0.011054	0.0171313	0.0212343	0.027379	0.023745	0.0226837	0.02346	0.020531
	727	0.0054818	0.0107759	0.0109197	0.017127	0.0214157	0.027141	0.0239237	0.022687	0.02348	0.0205043
	727.5	0.00550093	0.0107695	0.010886	0.0171513	0.0213667	0.027149	0.0238417	0.022798	0.0236047	0.0206447
	728	0.0056409	0.0108597	0.010929	0.0171933	0.0211317	0.027284	0.023821	0.0229647	0.0238847	0.0208447
	728.5	0.0057045	0.0109418	0.0109947	0.0172407	0.021103	0.027661	0.0238637	0.0230523	0.023947	0.0211963
	729	0.0055745	0.0107618	0.0111847	0.0172813	0.0212753	0.027767	0.023929	0.023098	0.023881	0.021487
	729.5	0.0055301	0.0106948	0.0113753	0.0173827	0.021454	0.027725	0.0237897	0.0230613	0.0239093	0.0216947
	730	0.00552557	0.0107262	0.011561	0.017457	0.0215113	0.02759	0.0235757	0.0230363	0.0240487	0.021665
	730.5	0.00557333	0.0109511	0.0116323	0.0174967	0.021605	0.027787	0.023605	0.0230773	0.0241293	0.021475
	731	0.0054317	0.0108409	0.0115587	0.0174807	0.0215347	0.027977	0.0238747	0.0231457	0.0241023	0.0213017
	731.5	0.0053694	0.0107211	0.011335	0.0174337	0.0214433	0.028009	0.023946	0.0231827	0.0240007	0.0212113
	732	0.0053946	0.0106387	0.0111717	0.017335	0.0214267	0.027809	0.0238873	0.023322	0.0240237	0.021327
	732.5	0.0054875	0.010745	0.011051	0.0172157	0.0215573	0.027913	0.0239757	0.023363	0.0242467	0.021488
	733	0.0056106	0.0109804	0.0110244	0.0172183	0.0217267	0.028057	0.0242047	0.02336	0.024467	0.021446
	733.5	0.00556637	0.0109827	0.0109958	0.0172767	0.0218173	0.028124	0.0242753	0.0232473	0.0245833	0.021459
	734	0.00546063	0.0109214	0.0109848	0.017361	0.0219053	0.028166	0.0242107	0.0232813	0.024577	0.0216343
	734.5	0.0052045	0.0106105	0.0109711	0.017377	0.02202	0.028296	0.0242267	0.023349	0.0245507	0.0217617
	735	0.00527377	0.010686	0.0111003	0.0173923	0.0218897	0.028452	0.024171	0.023574	0.024626	0.0217643
	735.5	0.00523947	0.0106652	0.0112447	0.017352	0.0216097	0.028498	0.024137	0.023606	0.0245783	0.0217437
	736	0.00525813	0.010729	0.0113257	0.0174703	0.0213487	0.028516	0.0241337	0.0236467	0.0245543	0.021777
	736.5	0.0053199	0.0107414	0.011261	0.01757	0.0214153	0.028522	0.0241813	0.023513	0.0243463	0.0218713
	737	0.00563837	0.0110745	0.011185	0.017673	0.0215047	0.028484	0.0240493	0.023373	0.0241277	0.021887
	737.5	0.00564693	0.0110989	0.011175	0.0176587	0.0216213	0.028284	0.023939	0.0230813	0.0240653	0.022038
	738	0.0056467	0.0110175	0.011193	0.0176687	0.0218013	0.028291	0.0238887	0.023036	0.0240713	0.0221773
	738.5	0.005568	0.0107113	0.0111753	0.0176193	0.0217877	0.028352	0.0238527	0.023001	0.024256	0.0222377
	739	0.00558363	0.0105861	0.010984	0.0175693	0.0218243	0.028396	0.0236803	0.0230337	0.024519	0.02203
	739.5	0.0055351	0.0105159	0.0107756	0.017548	0.022066	0.028112	0.0235713	0.0229133	0.024609	0.0217943
	740	0.00550953	0.0106368	0.0106047	0.0174887	0.0220753	0.027657	0.023509	0.0228573	0.024407	0.0216727
	740.5	0.00542627	0.0108157	0.010627	0.017331	0.0215697	0.027501	0.0237487	0.0229467	0.0240523	0.0216227
	741	0.00554403	0.0111103	0.0106554	0.0171893	0.0212017	0.027469	0.0239297	0.0230523	0.0236637	0.0214957
	741.5	0.00566143	0.0111054	0.0106373	0.017075	0.0210297	0.02747	0.0239107	0.022839	0.0232077	0.0211673
	742	0.00543643	0.0107326	0.0106339	0.0169477	0.020855	0.027451	0.023667	0.0225117	0.0227523	0.0209087
	742.5	0.00513583	0.010253	0.0107403	0.0167917	0.0207313	0.027231	0.0234493	0.022291	0.022847	0.020882
	743	0.0050149	0.0102086	0.0107954	0.0167523	0.0207013	0.026838	0.0232853	0.0221787	0.022815	0.020827
	743.5	0.00509673	0.0102929	0.0106985	0.0167697	0.0204903	0.02646	0.0231957	0.0220163	0.022933	0.0206793
	744	0.00501833	0.0102312	0.0104997	0.016789	0.0200337	0.026516	0.022963	0.021799	0.0229057	0.0205363
	744.5	0.0049095	0.0100224	0.0104019	0.0166273	0.0198487	0.026579	0.0226793	0.0214953	0.0229143	0.020461
	745	0.0046619	0.00979465	0.0103248	0.0162513	0.0198743	0.026327	0.0224127	0.0211677	0.0225713	0.0202687
	745.5	0.00454167	0.0096414	0.010123	0.0158193	0.019849	0.025759	0.022277	0.0210167	0.022139	0.0199333
	746	0.00469287	0.0096538	0.0098993	0.0155733	0.0197663	0.025452	0.0221263	0.0209547	0.0216723	0.0195253
	746.5	0.00497283	0.0098318	0.009697	0.0154013	0.0196327	0.025319	0.0217623	0.0208333	0.0213943	0.0191703
	747	0.00520377	0.0099306	0.00940797	0.015241	0.019423	0.025062	0.021187	0.020508	0.0212733	0.018919
	747.5	0.00504577	0.0097679	0.0090421	0.014984	0.0189257	0.024474	0.0208873	0.0201687	0.021066	0.0187143
	748	0.00457353	0.0092403	0.00893033	0.0146943	0.0183617	0.023904	0.0206037	0.0197153	0.020539	0.0183383
	748.5	0.00424173	0.0089777	0.00893797	0.0144337	0.017972	0.023699	0.0203973	0.0194297	0.020161	0.017912
	749	0.00431517	0.0090251	0.00904167	0.014167	0.0177947	0.023718	0.0199327	0.0190327	0.019989	0.0175963
	749.5	0.00454657	0.0091916	0.00890583	0.014011	0.01745	0.023532	0.0195363	0.0186997	0.0197317	0.0175947
	750	0.00477287	0.0092266	0.0086852	0.0139433	0.0169943	0.023026	0.0189423	0.0183407	0.0192127	0.017503
	750.5	0.00478427	0.00910405	0.00829263	0.013766	0.0165357	0.022348	0.0185197	0.017987	0.0188207	0.0173613
	751	0.0045388	0.00872565	0.00797717	0.0135007	0.0163517	0.021819	0.0181323	0.0176603	0.0185613	0.017174
	751.5	0.00423253	0.0082999	0.00786683	0.013139	0.0161897	0.021337	0.0178523	0.017324	0.0183273	0.0169403
	752	0.0042141	0.0081314	0.0077456	0.0129113	0.0160037	0.020847	0.0177603	0.0171743	0.0179567	0.016487
	752.5	0.00440563	0.00819445	0.00751293	0.012614	0.015748	0.020581	0.0176287	0.0169627	0.0174967	0.0159903
	753	0.00438613	0.0081212	0.00719193	0.0123947	0.0154193	0.020222	0.01732	0.0167487	0.0169977	0.0155313
	753.5	0.0040277	0.00779315	0.00706067	0.012111	0.0151423	0.019759	0.0167297	0.016316	0.016567	0.015129
	754	0.00367763	0.0074376	0.006964	0.012009	0.0148023	0.01916	0.016151	0.0159877	0.0160913	0.0147313
	754.5	0.0035533	0.00721525	0.00677203	0.0118187	0.014516	0.018751	0.015809	0.0157133	0.01557	0.0145373
	755	0.00367657	0.0072731	0.0066677	0.0115803	0.014226	0.018632	0.0156607	0.0154613	0.0151863	0.0142147
	755.5	0.00367043	0.0071941	0.00670897	0.011242	0.0139397	0.018505	0.0155957	0.015069	0.0152687	0.013894
	756	0.003573	0.00698855	0.00660463	0.0109653	0.0135627	0.018004	0.0151973	0.0145263	0.0153293	0.0136103
	756.5	0.00342267	0.00675775	0.00633517	0.0106557	0.0132713	0.017395	0.014761	0.014251	0.014919	0.0133067
	757	0.00339493	0.0066225	0.00618123	0.0104497	0.012902	0.017018	0.0145563	0.0141143	0.0144243	0.0128717
	757.5	0.00325053	0.0063662	0.0060546	0.0102089	0.012387	0.016911	0.0144863	0.0140543	0.014194	0.012642
	758	0.0029969	0.00609295	0.0058779	0.00997393	0.0120277	0.016704	0.014064	0.0137933	0.014265	0.0126083
	758.5	0.00283303	0.00600945	0.00566873	0.0097674	0.0119103	0.016479	0.01362	0.0135003	0.0140193	0.0125167
	759	0.00283703	0.00600935	0.0057483	0.00962037	0.011802	0.016109	0.013209	0.0132757	0.013417	0.0123333
	759.5	0.00311143	0.00610965	0.0057736	0.00938403	0.0115373	0.015562	0.012989	0.012944	0.0129113	0.012034
	760	0.00316987	0.0059106	0.0057593	0.00908863	0.0111373	0.015051	0.0125867	0.012666	0.012454	0.011417
	760.5	0.00300383	0.0055358	0.00539937	0.00897727	0.0108487	0.014739	0.0122717	0.0122723	0.0120533	0.0108247
	761	0.0028683	0.0052914	0.005117	0.00898427	0.0109903	0.014319	0.0120833	0.0118957	0.0117983	0.0105143
	761.5	0.00288087	0.00533405	0.004882	0.00904783	0.011187	0.014135	0.011928	0.0114553	0.011641	0.0106677
	762	0.00291203	0.0054476	0.0047428	0.0088826	0.0110243	0.014047	0.0116453	0.0113307	0.0115183	0.010725
	762.5	0.00305297	0.0056403	0.0045357	0.00855257	0.0105197	0.01401	0.01127	0.0111703	0.0111107	0.0105919
	763	0.0031692	0.00573235	0.0043792	0.0082629	0.0100499	0.013742	0.0109417	0.0109887	0.010631	0.0102786
	763.5	0.0031472	0.00557115	0.00433133	0.0081721	0.00978737	0.013505	0.0106047	0.0107063	0.010388	0.0103572
	764	0.00290577	0.00524765	0.00444393	0.0079556	0.00970913	0.013089	0.010222	0.0104049	0.0103417	0.0103469
	764.5	0.0027828	0.00496945	0.0045413	0.0077073	0.0096152	0.012776	0.0098235	0.01013	0.0100467	0.0101488
	765	0.00292567	0.00505755	0.00444583	0.00749847	0.00916377	0.012525	0.00952477	0.00978097	0.00980363	0.00957503
	765.5	0.00301813	0.0049888	0.004074	0.00734063	0.00874783	0.012331	0.009075	0.00952563	0.00965553	0.00894193
	766	0.0027062	0.004674	0.0036881	0.0068306	0.00839953	0.011542	0.00898793	0.0093101	0.00952787	0.00840803
	766.5	0.0023833	0.0043538	0.00330053	0.00640717	0.0081954	0.010878	0.00891403	0.00907303	0.0089669	0.00808547
	767	0.00217807	0.0042462	0.00310537	0.00615863	0.00787157	0.010453	0.00893237	0.0087328	0.00841963	0.0080022
	767.5	0.00221727	0.0043473	0.0030921	0.00612777	0.00734407	0.010436	0.00880027	0.00842037	0.0078201	0.00791467
	768	0.00205523	0.0042742	0.00316827	0.00607323	0.007037	0.010574	0.0086628	0.00825667	0.00747203	0.00789877
	768.5	0.00191533	0.00412495	0.0030632	0.00597357	0.0068846	0.010597	0.0085048	0.00810273	0.0072358	0.00760083
	769	0.00202017	0.00408125	0.0028058	0.0058705	0.0068265	0.010252	0.0083531	0.00793003	0.00720153	0.00729133
	769.5	0.00211793	0.0040477	0.002723	0.0055775	0.0064627	0.0098517	0.00807537	0.00779453	0.00714947	0.0069198
	770	0.0021092	0.00403415	0.00276857	0.0052716	0.00622903	0.0098862	0.0078151	0.0077767	0.0071881	0.0068616
	770.5	0.00210203	0.0038679	0.00289723	0.0050349	0.00594093	0.0099303	0.00731163	0.00744183	0.00695183	0.00671603
	771	0.0020391	0.00367305	0.00288293	0.00491347	0.00601167	0.0097105	0.0068092	0.00698403	0.0066814	0.00659383
	771.5	0.0018336	0.0033999	0.00270427	0.00481563	0.0060239	0.0091712	0.00658877	0.00653407	0.00635957	0.00625097
	772	0.00171937	0.0033718	0.00259503	0.00470097	0.0059992	0.0085001	0.00664153	0.0061777	0.00620387	0.00597147
	772.5	0.0015388	0.00306565	0.00260923	0.00460753	0.00555217	0.0078789	0.0065656	0.0060844	0.00597147	0.00580503
	773	0.0013246	0.00270265	0.00225053	0.00448223	0.00540733	0.0074376	0.00597527	0.00610647	0.00546553	0.00575087
	773.5	0.00133049	0.0026197	0.00180953	0.0043068	0.00516123	0.0076105	0.00552883	0.0061018	0.00502153	0.005782
	774	0.00144926	0.00284875	0.00162692	0.00408943	0.0049713	0.007718	0.00560687	0.00583587	0.00487217	0.00565167
	774.5	0.00150601	0.00305535	0.00155637	0.00400183	0.0048477	0.0074891	0.00579983	0.00558773	0.00501813	0.00555323
	775	0.00136563	0.0030769	0.00153187	0.00393027	0.00488257	0.0070578	0.0058463	0.00537613	0.00514493	0.00538123
	775.5	0.0011408	0.00295625	0.00152741	0.0039332	0.00487803	0.0068694	0.0058929	0.00547773	0.0049224	0.00530163
	776	0.00102621	0.0029045	0.00141881	0.00385267	0.00507523	0.006886	0.00594137	0.00559063	0.00483913	0.00519057
	776.5	0.001262	0.0029878	0.00130799	0.003811	0.0052829	0.0068466	0.0055192	0.0053315	0.00474243	0.00499167
	777	0.00184227	0.0033351	0.00129971	0.00381243	0.00486143	0.0067719	0.00511607	0.0050274	0.00461617	0.0048117
	777.5	0.00178113	0.0032278	0.00142983	0.00373573	0.00413563	0.0065086	0.00485673	0.00494647	0.004427	0.0046477
	778	0.00125583	0.002769	0.00128641	0.003642	0.0039616	0.0064051	0.0046869	0.00506717	0.0041374	0.00436207
	778.5	0.000828853	0.00229805	0.00117309	0.00346423	0.0041842	0.0063546	0.0044185	0.0049557	0.00386793	0.0041141
	779	0.00079034	0.002024	0.00101918	0.0033907	0.0043032	0.0062536	0.00419173	0.00483067	0.00369477	0.00409323
	779.5	0.00100594	0.0020062	0.00110145	0.00334453	0.0041066	0.0059967	0.0041726	0.0046094	0.0035864	0.00403747
	780	0.00121279	0.0021116	0.000991657	0.00327847	0.0039033	0.0056757	0.00409883	0.0046434	0.00346943	0.00383287
	780.5	0.00113062	0.00218025	0.000818543	0.00305463	0.00363397	0.0053256	0.0040314	0.00456293	0.00339327	0.00355457
	781	0.00101611	0.00219575	0.00066562	0.002798	0.0037417	0.0051384	0.00400573	0.0044836	0.0035151	0.00355367
	781.5	0.00098548	0.0021973	0.000746948	0.00266577	0.00361273	0.0052086	0.0040997	0.00436907	0.00327427	0.00349507
	782	0.0015154	0.00274665	0.000781853	0.00268803	0.00338747	0.0052779	0.00408503	0.0041313	0.0031909	0.0033404
	782.5	0.00186997	0.00323245	0.000768245	0.0026772	0.00323973	0.005292	0.00408543	0.00377297	0.00299947	0.00323483
	783	0.00185353	0.00325205	0.000673407	0.0025511	0.0034584	0.0054309	0.0040197	0.00355197	0.00302263	0.0035579
	783.5	0.0015274	0.00274125	0.000564133	0.0023579	0.00342177	0.0059198	0.00372673	0.00370533	0.0027024	0.0038758
	784	0.00133893	0.0024526	0.000659385	0.0022447	0.00291547	0.005908	0.0036171	0.0038794	0.0027514	0.00402287
	784.5	0.001336	0.00229105	0.000947583	0.0022484	0.00271247	0.0055686	0.0037198	0.00380023	0.0027835	0.00385797
	785	0.0014032	0.00226045	0.00137346	0.00226233	0.0027774	0.004828	0.00380307	0.0037081	0.00313513	0.00355117
	785.5	0.00127347	0.0021887	0.00131128	0.002207	0.00288263	0.0045199	0.00352813	0.0036443	0.00318837	0.0033108
	786	0.00102987	0.0021524	0.0010537	0.00212727	0.00297797	0.004324	0.00343037	0.00370207	0.00308163	0.00321003
	786.5	0.000974857	0.0022751	0.00082972	0.00220373	0.00324553	0.004284	0.0035366	0.0038966	0.00275883	0.0031057
	787	0.00109934	0.00243335	0.000805467	0.0023725	0.00325213	0.0042256	0.0035872	0.00378613	0.0025903	0.00281963
	787.5	0.00141577	0.00257925	0.000801383	0.00250047	0.00315097	0.0045059	0.0034976	0.00358393	0.00264163	0.00260253
	788	0.0016939	0.00251655	0.000642265	0.00253867	0.00308877	0.0049108	0.00344587	0.00360003	0.00275637	0.00272893
	788.5	0.0016485	0.00227475	0.000539567	0.00256367	0.00287507	0.0048982	0.00342453	0.00389227	0.00292187	0.00282957
	789	0.00134507	0.00199215	0.0005283	0.00244637	0.00243993	0.0047218	0.00332433	0.00382183	0.0025869	0.0029735
	789.5	0.00106908	0.00170925	0.000570748	0.0023397	0.00235273	0.004524	0.0030761	0.00340327	0.0023348	0.00304703
	790	0.00097935	0.0014926	0.000570645	0.00226457	0.0026367	0.0045585	0.00295157	0.00312013	0.0020263	0.00298013
	790.5	0.000847693	0.0014201	0.000426133	0.0023509	0.00291677	0.0042057	0.0032632	0.00311537	0.00218793	0.00300827
	791	0.000773707	0.00149725	0.000375133	0.00223093	0.00302137	0.0036268	0.0036033	0.0032493	0.00229863	0.00294757
	791.5	0.000909117	0.00173025	0.000315863	0.00210057	0.00303243	0.0032985	0.0034767	0.00329407	0.00246363	0.00292893
	792	0.00092262	0.0019423	0.000325937	0.00204367	0.00291373	0.003528	0.00305537	0.00323343	0.00242413	0.0029579
	792.5	0.000996617	0.00216905	0.000323857	0.0022028	0.0027828	0.0039742	0.00291473	0.0033439	0.00236647	0.00298033
	793	0.00114268	0.0022934	0.00028754	0.00219627	0.0025034	0.0041867	0.00312857	0.0034646	0.0023019	0.0026998
	793.5	0.00138073	0.0023173	0.000265497	0.00201023	0.0020991	0.0044614	0.0028578	0.00335943	0.00234037	0.00245747
	794	0.00129903	0.0020794	0.0003669	0.00175307	0.0019639	0.0046023	0.00266663	0.00309967	0.0023904	0.00238537
	794.5	0.00106703	0.0018471	0.000472467	0.0019093	0.00222807	0.0046131	0.00281933	0.00287647	0.00234637	0.0025817
	795	0.00109947	0.00179195	0.000470967	0.0018409	0.00205273	0.0049214	0.003216	0.00298967	0.002358	0.0025686
	795.5	0.00110351	0.0017667	0.000496	0.00175677	0.0018003	0.0050081	0.00300967	0.00289767	0.00208047	0.0026235
	796	0.00123887	0.00174485	0.000502167	0.0015675	0.00186227	0.0048372	0.00263237	0.00249493	0.00179963	0.00247797
	796.5	0.0014699	0.0018164	0.000477633	0.0015866	0.00223513	0.0045709	0.0021779	0.0023062	0.00191837	0.00219657
	797	0.0014288	0.0016608	0.000388533	0.0015546	0.00268403	0.0042841	0.0022763	0.0024498	0.00221193	0.0023264
	797.5	0.000933007	0.0013015	0.000328863	0.0015455	0.00307133	0.0033431	0.00246337	0.002412	0.00217837	0.00273803
	798	0.000618257	0.00134655	0.000274557	0.0017272	0.00317133	0.0028038	0.0026161	0.0022298	0.00181177	0.0028854
	798.5	0.000819477	0.0018428	0.00029201	0.00176733	0.00296607	0.0026231	0.00249743	0.00202103	0.00180687	0.0026169
	799	0.00126944	0.00242935	0.0003439	0.00183833	0.00260497	0.0033102	0.00224337	0.0020373	0.00182477	0.00269453
	799.5	0.00180353	0.00261555	0.000415167	0.0017771	0.0023628	0.0036232	0.0021762	0.0020673	0.00160517	0.00272333
	800	0.00203427	0.00260995	0.000432233	0.0019341	0.0021348	0.0037384	0.00207083	0.0018476	0.00125463	0.00301417
	800.5	0.0017961	0.0021459	0.000532684	0.00190277	0.00219553	0.0039179	0.0022104	0.002069	0.00093867	0.0029401
	801	0.00118133	0.0014652	0.000615291	0.00174387	0.00241347	0.0041546	0.0020083	0.0025665	0.00103707	0.00288917
	801.5	0.000781467	0.00097041	0.000519903	0.00154843	0.0023432	0.0040741	0.00184557	0.0026591	0.0013373	0.00257663
	802	0.000563413	0.000968675	0.000332143	0.00152443	0.0017942	0.0035609	0.0021044	0.0022503	0.00173773	0.00242193
	802.5	0.00055279	0.00132011	0.000322633	0.0016273	0.00163943	0.0034102	0.00237027	0.0019283	0.00218123	0.0022478
	803	0.000991853	0.00212695	0.000412	0.00157143	0.00194683	0.0033194	0.0022238	0.00178497	0.00235717	0.00235523
	803.5	0.00136707	0.00248625	0.000411633	0.00147703	0.00243003	0.0033894	0.00211133	0.0016985	0.00218233	0.0023599
	804	0.0015867	0.002625	0.000382367	0.00151207	0.0025097	0.0034737	0.00215207	0.0020874	0.00202433	0.00245223
	804.5	0.00149847	0.0023544	0.000313397	0.00159223	0.00226427	0.0038178	0.00253087	0.00249383	0.00203763	0.00260913
	805	0.00153057	0.0022501	0.00018857	0.0017012	0.0021025	0.003999	0.00249367	0.0026097	0.00166803	0.0026002
	805.5	0.00157407	0.00225545	0.000123027	0.0017349	0.00174707	0.0041058	0.00253103	0.00242463	0.0013447	0.00253833
	806	0.00136643	0.00204905	0.000191583	0.00156433	0.00146503	0.0041126	0.00240563	0.0022299	0.00105884	0.00237027
	806.5	0.00117828	0.0018703	0.00025231	0.0011854	0.0015696	0.0041427	0.00247657	0.00222743	0.00088981	0.00237693
	807	0.00121861	0.0018356	0.000216537	0.00108502	0.00179437	0.0040173	0.00254563	0.00193637	0.00129123	0.00254423
	807.5	0.00115968	0.0017345	0.000197883	0.00125053	0.00202183	0.0033018	0.00245013	0.00193627	0.00172097	0.0028346
	808	0.00135426	0.00189195	0.000212767	0.00132187	0.00189837	0.003048	0.00204077	0.0020903	0.002242	0.00253753
	808.5	0.00127298	0.0020184	0.000224897	0.00122533	0.00172517	0.0033802	0.00190087	0.00242393	0.0021521	0.00238713
	809	0.0014538	0.00195005	0.000257757	0.00142381	0.00147422	0.0036445	0.00196723	0.00222467	0.0022416	0.00227757
	809.5	0.00165387	0.00186225	0.00027368	0.00160947	0.00160093	0.0037013	0.00242873	0.00206987	0.00258937	0.00198323
	810	0.00206267	0.0020668	0.00020552	0.0015459	0.00191407	0.0036847	0.00274773	0.0019799	0.00269033	0.0018593

## Sheet: Exp. B bottle 1
Experiment B		Average of Bottle 1 Chl fluorescence measurements [W]; time in hours
		0	12	24	36	48	72	84	96	108	168
bottle 1	Wavelength [nm]	Am	Pm	Am	Pm	Am	Am	PM	Am	PM	Am
	390	0.000633933	0.000619167	0.0003166	0.000125373	0	0	8.19813e-05	0	6.45067e-05	0
	390.5	0.000624233	0.000692033	0.000376433	0.000175267	0	1.57833e-06	8.23631e-05	0	7.883e-05	0
	391	0.000620967	0.000726667	0.000409233	0.000241567	0	1.637e-05	6.49867e-05	0	0.000115327	0
	391.5	0.000625833	0.000735533	0.000424367	0.000323333	0	2.30933e-05	5.18467e-05	0	0.00016138	0
	392	0.000641667	0.0006585	0.0003489	0.0003415	0	2.104e-05	6.30653e-05	0	0.00016465	0
	392.5	0.000671767	0.0006225	0.000308167	0.0003397	0	7.92e-06	5.537e-05	0	0.0001651	0
	393	0.000692333	0.000650833	0.0003311	0.000321467	0	1.75867e-06	4.95167e-05	0	0.000158033	0
	393.5	0.000689533	0.0007728	0.000432233	0.000333667	0	3.56333e-06	5.752e-05	0	0.000146747	1.51e-06
	394	0.0006976	0.000888533	0.000513733	0.000353133	0	1.654e-05	7.65767e-05	0	0.000131267	4.95e-06
	394.5	0.000737033	0.000951433	0.000570533	0.0003678	0	2.27667e-05	0.000107063	0	0.000105753	1.83767e-05
	395	0.000829167	0.0009755	0.000598367	0.000357033	0	2.385e-05	0.000124387	0	7.56733e-05	4.81467e-05
	395.5	0.000927467	0.000979933	0.0006094	0.000374667	0	2.412e-05	9.31363e-05	0	3.639e-05	3.93767e-05
	396	0.000986033	0.000996833	0.0006292	0.000380967	0	2.04133e-05	7.899e-05	0	6.10267e-05	1.35267e-05
	396.5	0.000996733	0.0009636	0.000592167	0.000383	0	1.87633e-05	8.026e-05	0	9.58467e-05	0
	397	0.000961067	0.0009346	0.0005448	0.0004078	0	8.84333e-06	0.000113847	0	0.00011967	0
	397.5	0.000898733	0.000940133	0.000564	0.0004281	0	0	0.000176367	0	0.000125	0
	398	0.000873167	0.000967633	0.0005946	0.000457067	0	0	0.000202133	0	0.000110723	0
	398.5	0.000890167	0.0010119	0.000640933	0.000470333	0	1.23833e-05	0.000192833	0	8.05867e-05	0
	399	0.000941467	0.0010091	0.0006527	0.000476533	0	3.52667e-05	0.000167967	0	7.06563e-05	0
	399.5	0.00103537	0.000968933	0.000619733	0.0004746	0	6.46333e-05	0.000130783	0	5.75567e-05	0
	400	0.00104193	0.000933433	0.000581767	0.0004816	0	6.42e-05	8.93933e-05	0	5.65033e-05	6.19667e-08
	400.5	0.00102417	0.000898133	0.0005291	0.000433633	0	5.00333e-05	8.72467e-05	0	4.61733e-05	7.65e-08
	401	0.0009773	0.0008853	0.000488433	0.000403667	0	1.28433e-05	0.000103903	0	4.46267e-05	1.71233e-06
	401.5	0.0008939	0.0009039	0.000474367	0.0003822	0	0	0.000133073	0	5.29233e-05	0
	402	0.000870467	0.0009521	0.000517367	0.000392367	0	0	0.000156167	0	7.90233e-05	0
	402.5	0.000856333	0.00103683	0.000615033	0.0004253	0	1.10447e-06	0.000125233	0	0.000114992	0
	403	0.000883033	0.00110597	0.000695233	0.000413033	0	1.2031e-05	8.619e-05	0	0.00011277	0
	403.5	0.000902367	0.00112447	0.0007126	0.000406	0	2.56e-05	5.6853e-05	0	0.000108987	0
	404	0.000891833	0.00111	0.0006947	0.0003872	0	1.68233e-05	4.14367e-05	0	8.84437e-05	0
	404.5	0.000927	0.001078	0.000650967	0.0003918	0	1.63063e-05	3.04867e-05	0	6.99063e-05	0
	405	0.000953433	0.00105467	0.000614	0.000406333	0	2.70543e-05	3.09093e-05	0	7.70325e-05	0
	405.5	0.00102233	0.00105233	0.000575333	0.000412267	0	2.106e-05	3.49267e-05	0	8.42863e-05	0
	406	0.00111333	0.00102803	0.0005162	0.0004263	0	2.62933e-05	3.66333e-05	0	0.000106987	0
	406.5	0.00112833	0.0010119	0.0005128	0.000431833	0	2.18433e-05	7.02133e-05	0	0.00011825	0
	407	0.00110133	0.00100987	0.000558867	0.000441667	0	9.21667e-06	0.000110773	0	9.086e-05	0
	407.5	0.0010555	0.0010389	0.000620033	0.000462467	0	6.75667e-06	0.000184633	0	4.64267e-05	0
	408	0.00102117	0.00105113	0.000653033	0.0004611	0	1.56167e-05	0.000252867	0	2.35933e-05	0
	408.5	0.00101727	0.0010638	0.000674033	0.000438	0	2.72933e-05	0.000285233	0	3.69077e-05	0
	409	0.0010213	0.00109953	0.000709933	0.000440233	0	3.03673e-05	0.0002836	0	7.304e-05	0
	409.5	0.00100447	0.0011116	0.000730367	0.000449167	0	4.23e-05	0.0002379	0	0.000106757	2.95733e-06
	410	0.000965067	0.00115267	0.000753667	0.0004843	0	4.45e-05	0.0002009	0	0.000137157	1.484e-05
	410.5	0.000971367	0.001151	0.000727467	0.000527233	0	5.02333e-05	0.00016732	0	0.000183297	1.636e-05
	411	0.00102633	0.00111967	0.000679033	0.000539467	0	4.52667e-05	0.000152033	0	0.000222067	2.65467e-06
	411.5	0.00111907	0.00110667	0.000649233	0.000567433	0	3.206e-05	0.000135637	0	0.000233667	0
	412	0.00120467	0.0010102	0.000550433	0.000538567	0	3.12967e-05	0.00013928	0	0.000185633	0
	412.5	0.001287	0.000968733	0.000506867	0.000498467	0	4.69533e-05	0.000146303	0	0.00010351	0
	413	0.00133333	0.000989367	0.000538633	0.000472933	0	7.651e-05	0.000140473	0	6.48737e-05	0
	413.5	0.00135467	0.00105267	0.0005966	0.000458367	0	9.79233e-05	0.000130017	0	5.75667e-05	0
	414	0.001392	0.001151	0.000688933	0.000480133	0	9.754e-05	9.41333e-05	0	0.00010965	7.89667e-06
	414.5	0.00141867	0.00119233	0.0007143	0.0004777	0	8.00167e-05	8.412e-05	0	0.000180067	1.9814e-05
	415	0.00142767	0.00122867	0.000723	0.000493333	0	7.45767e-05	0.000107713	0	0.000202567	1.77867e-05
	415.5	0.001445	0.00129	0.0007614	0.000533833	0	5.93252e-05	0.000153667	0	0.0002077	1.32167e-05
	416	0.001435	0.00136833	0.0008234	0.0005624	0	6.67e-05	0.000193733	0	0.000181867	2.12367e-06
	416.5	0.00144367	0.001446	0.000887433	0.000584	0	8.387e-05	0.0001833	0	0.000172367	0
	417	0.00154267	0.001476	0.000906267	0.0005533	0	8.63e-05	0.0001656	0	0.000156133	0
	417.5	0.00166333	0.00153633	0.0009426	0.000517533	0	8.52667e-05	0.000152067	0	0.000148267	1.13567e-05
	418	0.00177867	0.00160267	0.000976067	0.0005444	0	5.47833e-05	0.00013998	0	0.000138167	2.01567e-05
	418.5	0.001845	0.00169233	0.0010468	0.0005925	0	3.019e-05	0.000127437	0	0.00010993	2.021e-05
	419	0.00187767	0.00177833	0.00112933	0.000661167	0	3.11467e-05	0.000116417	0	0.000125433	8.01e-06
	419.5	0.00194633	0.00178367	0.001126	0.000653633	0	6.435e-05	0.0001391	0	0.000168767	0
	420	0.00205933	0.00178133	0.001106	0.000630233	0	0.000116233	0.000193133	0	0.0002397	0
	420.5	0.00217533	0.00175833	0.00106743	0.000609967	0	0.000148023	0.000258433	0	0.000303933	0
	421	0.002282	0.001798	0.0010915	0.000631167	0	0.000143253	0.000302567	0	0.000298867	0
	421.5	0.00239133	0.001895	0.001195	0.0007374	0	0.000114163	0.000361033	0	0.000265233	0
	422	0.00247933	0.00205333	0.00136833	0.0008663	0	0.00011043	0.000419533	0	0.000233	0
	422.5	0.00257967	0.00222667	0.00153133	0.0009984	0	0.00015656	0.0004348	0	0.000216167	2.258e-06
	423	0.00272167	0.00234267	0.00161933	0.001095	0	0.0002527	0.000421833	0	0.000191647	3.48e-06
	423.5	0.00288933	0.00243333	0.00166267	0.00112767	0	0.000340967	0.000375367	0	0.000185033	1.75333e-07
	424	0.00310033	0.002511	0.00167733	0.00112167	0	0.0003536	0.000368967	0	0.000221067	0
	424.5	0.003345	0.002645	0.00173733	0.00112967	0	0.0003543	0.000412767	0	0.000295867	2.337e-06
	425	0.003585	0.00283067	0.00184967	0.00118	0	0.0003473	0.0004617	0	0.000388833	3.637e-05
	425.5	0.00384167	0.00302867	0.001974	0.001273	0	0.000352733	0.0004848	0	0.000452	9.5e-05
	426	0.00414967	0.003215	0.00209667	0.00135833	0	0.000408033	0.000481267	1.42133e-06	0.000483633	0.000119766
	426.5	0.004475	0.00338833	0.00222133	0.001428	0	0.000465067	0.000504633	1.52833e-05	0.0005185	0.00011756
	427	0.00482633	0.003602	0.00239333	0.001532	0	0.000511	0.000567567	5.00333e-05	0.000552133	0.00011412
	427.5	0.00516167	0.003843	0.002605	0.00166867	0	0.000580233	0.000656433	8.67567e-05	0.0005756	0.000133343
	428	0.00547967	0.00410233	0.00279967	0.00181733	4.10467e-05	0.000620333	0.000735267	0.00011934	0.0006268	0.0001513
	428.5	0.00579967	0.00437867	0.002986	0.001908	6.01567e-05	0.0006585	0.000791467	0.000159867	0.000679633	0.000155103
	429	0.006163	0.004653	0.00314967	0.00197133	7.34233e-05	0.000711933	0.000846733	0.000203333	0.000717633	0.000153987
	429.5	0.00662433	0.005037	0.003393	0.002068	9.8007e-05	0.000756333	0.000912567	0.000253567	0.0007655	0.0001688
	430	0.007125	0.00542167	0.00365933	0.002225	0.000185543	0.000804367	0.000970067	0.0002813	0.000804933	0.0002428
	430.5	0.00773033	0.00582333	0.00394733	0.00245633	0.000342933	0.000855733	0.00103767	0.0003202	0.000870733	0.0003513
	431	0.00842767	0.00623933	0.00423767	0.00270367	0.000504067	0.000886933	0.00111233	0.000370533	0.00097	0.0004573
	431.5	0.00914367	0.00666867	0.00452567	0.00290733	0.0006348	0.000939733	0.001214	0.000484967	0.00106333	0.000576567
	432	0.00992467	0.00716467	0.00482167	0.00313167	0.000778633	0.00102663	0.001295	0.0005909	0.00117267	0.000657967
	432.5	0.01073	0.00771267	0.00515367	0.00333967	0.0009174	0.00111273	0.00137767	0.000693133	0.00128733	0.000736767
	433	0.0115933	0.00825133	0.005473	0.00359333	0.0010728	0.0012063	0.00144233	0.000770067	0.00141	0.000769
	433.5	0.01256	0.00887633	0.00587	0.003904	0.00124867	0.00128867	0.001533	0.000840067	0.00155333	0.000774467
	434	0.0136033	0.00959267	0.00633067	0.00422433	0.001423	0.00140967	0.001653	0.0009196	0.00167967	0.000736633
	434.5	0.0147033	0.010367	0.006845	0.00456267	0.00160333	0.001539	0.00175533	0.0009786	0.00182467	0.0006412
	435	0.0159	0.0112167	0.00743367	0.00491333	0.00179233	0.00165733	0.00187567	0.0010362	0.001947	0.0005697
	435.5	0.0172033	0.01212	0.008084	0.00530233	0.002022	0.00177067	0.002019	0.00111267	0.00210533	0.000637733
	436	0.0186367	0.0131267	0.00880967	0.00573767	0.002288	0.00193	0.00219633	0.00124367	0.00228433	0.000861533
	436.5	0.0201667	0.01426	0.00960433	0.00621067	0.00257267	0.00214633	0.00240167	0.00139333	0.00247133	0.00117933
	437	0.0219067	0.0154867	0.0104547	0.006764	0.00288833	0.00243233	0.002583	0.001555	0.00268267	0.001427
	437.5	0.0237633	0.0167733	0.0113433	0.00736433	0.00320867	0.00270067	0.002758	0.00171633	0.00289733	0.001604
	438	0.0258267	0.0181533	0.01225	0.00803233	0.003596	0.002976	0.00299267	0.00190133	0.003126	0.00177167
	438.5	0.02805	0.0196667	0.01323	0.00871333	0.003988	0.00325167	0.003269	0.00212733	0.00336267	0.001968
	439	0.0304033	0.0213333	0.0143333	0.00941367	0.00438867	0.00354433	0.003582	0.002385	0.00366533	0.002177
	439.5	0.0329467	0.0231167	0.01553	0.0101773	0.00480633	0.00386133	0.00391567	0.00265067	0.004014	0.00236133
	440	0.0356267	0.02502	0.01684	0.0110333	0.00526467	0.00418233	0.00426433	0.00290767	0.004387	0.00256867
	440.5	0.0385833	0.0270567	0.0182367	0.0120033	0.00580433	0.00452867	0.00466867	0.00319133	0.00479267	0.002823
	441	0.04178	0.0292733	0.0197533	0.0130433	0.00640767	0.00489167	0.00509633	0.003465	0.00522233	0.00311967
	441.5	0.04523	0.0316967	0.0214567	0.01413	0.00704567	0.00528633	0.005522	0.003762	0.00571633	0.00341433
	442	0.04888	0.0342633	0.0232867	0.0152833	0.00772933	0.005706	0.00598767	0.004116	0.00623233	0.00369333
	442.5	0.0528233	0.0370633	0.0252633	0.0165833	0.008478	0.00614967	0.006478	0.00449767	0.00674767	0.00396933
	443	0.0570933	0.0400367	0.0273267	0.01801	0.00931833	0.00666533	0.007005	0.00492667	0.00721733	0.004301
	443.5	0.0617567	0.04332	0.0296	0.0195967	0.010221	0.00721267	0.00754733	0.005365	0.00774	0.00468333
	444	0.0668033	0.04691	0.03212	0.02124	0.01118	0.007864	0.00811367	0.005809	0.00835033	0.005092
	444.5	0.0722033	0.0508167	0.0349	0.02294	0.01215	0.00854567	0.00875667	0.00628267	0.00901933	0.005525
	445	0.0780167	0.0550967	0.03794	0.02483	0.0132267	0.00927867	0.00950167	0.00684667	0.00978933	0.005985
	445.5	0.0842233	0.0596433	0.04118	0.02692	0.0144233	0.0100617	0.0103233	0.00744267	0.0105743	0.00649467
	446	0.09098	0.06457	0.0446767	0.0292733	0.0157633	0.010889	0.0112167	0.008115	0.011419	0.007046
	446.5	0.0982333	0.0699	0.04853	0.0318233	0.01723	0.0117933	0.01215	0.00883567	0.0123133	0.00768767
	447	0.106077	0.0756267	0.0527	0.0345933	0.0188267	0.0127567	0.01315	0.00957933	0.0133	0.008364
	447.5	0.114867	0.0819433	0.0572733	0.0376867	0.0205633	0.0138567	0.0142833	0.0104267	0.0144333	0.00910333
	448	0.1245	0.0888567	0.0622667	0.0411033	0.0224767	0.0151	0.01554	0.0113733	0.01567	0.00989033
	448.5	0.134933	0.09633	0.06761	0.0448133	0.0245433	0.01645	0.0168867	0.0124133	0.017	0.0107017
	449	0.1463	0.104573	0.07353	0.0489067	0.0268267	0.0179433	0.0183167	0.0135467	0.01844	0.01162
	449.5	0.1584	0.1134	0.0799167	0.0532967	0.02928	0.0195167	0.0198333	0.0147333	0.0199633	0.01261
	450	0.171967	0.1234	0.0870767	0.05832	0.0320833	0.02123	0.0215267	0.0160567	0.0216833	0.0137467
	450.5	0.1865	0.1341	0.0948767	0.0637167	0.0351033	0.0230867	0.02344	0.0175167	0.02356	0.0149767
	451	0.202133	0.1456	0.103297	0.0695267	0.0384067	0.0251567	0.02557	0.01914	0.0256333	0.0163167
	451.5	0.218167	0.158267	0.112533	0.0758967	0.0420433	0.0274333	0.0279133	0.0209	0.0278967	0.0177767
	452	0.233233	0.1718	0.1224	0.08269	0.0459367	0.0298533	0.0303867	0.0227467	0.0302933	0.0193633
	452.5	0.245267	0.1863	0.133	0.09003	0.0501433	0.0323967	0.0329633	0.0246933	0.0327967	0.0210833
	453	0.252267	0.201367	0.1441	0.0977433	0.0545633	0.0350833	0.0356267	0.0267167	0.0354467	0.0228833
	453.5	0.255567	0.2176	0.156167	0.106053	0.0593067	0.0380467	0.0385433	0.0288967	0.0383333	0.0247533
	454	0.2561	0.2333	0.169	0.114867	0.0643433	0.0411967	0.0417067	0.03124	0.0414333	0.0267533
	454.5	0.2556	0.245567	0.182667	0.124133	0.0696333	0.04449	0.0451133	0.03379	0.04474	0.0288733
	455	0.2547	0.2524	0.197067	0.133933	0.07523	0.0479467	0.04874	0.03653	0.0481933	0.0311433
	455.5	0.2532	0.254133	0.2119	0.144133	0.0810833	0.0516	0.05252	0.0394333	0.05174	0.03351
	456	0.2518	0.2535	0.226033	0.154567	0.08708	0.0553633	0.0563233	0.0423967	0.0553267	0.0358967
	456.5	0.2505	0.2521	0.2375	0.165233	0.09322	0.05921	0.0602	0.0453667	0.05897	0.0382833
	457	0.2493	0.2509	0.244667	0.175967	0.09939	0.0630133	0.0641367	0.0482867	0.0626633	0.04073
	457.5	0.2479	0.2494	0.247467	0.186467	0.10545	0.0667233	0.0679767	0.0510967	0.06636	0.0431767
	458	0.2468	0.2483	0.248033	0.196967	0.111533	0.07043	0.07181	0.0539267	0.0701033	0.04568
	458.5	0.2459	0.2475	0.2475	0.206967	0.117467	0.07404	0.07549	0.0567	0.0737967	0.04814
	459	0.2452	0.2468	0.2468	0.2165	0.1231	0.0775433	0.07908	0.0594467	0.0773667	0.05048
	459.5	0.2444	0.2459	0.2459	0.224367	0.128267	0.0807867	0.0823833	0.0619467	0.08057	0.05261
	460	0.2436	0.2451	0.2451	0.230633	0.1329	0.0837333	0.0853633	0.06424	0.0834633	0.0545833
	460.5	0.2427	0.2442	0.2442	0.2344	0.1368	0.0861667	0.0879	0.0661733	0.0858533	0.05628
	461	0.2423	0.2438	0.2438	0.236867	0.140167	0.0882467	0.09008	0.06787	0.0879733	0.0577867
	461.5	0.242	0.2435	0.2435	0.238333	0.142867	0.0899367	0.0919333	0.06924	0.0896867	0.0589233
	462	0.2415	0.2431	0.2431	0.2391	0.144767	0.0911433	0.09324	0.0702467	0.0909867	0.0597833
	462.5	0.2414	0.243	0.243	0.239767	0.146	0.09191	0.0940167	0.07083	0.0918333	0.06032
	463	0.2412	0.2429	0.2429	0.239733	0.146167	0.0919833	0.0941533	0.07092	0.09202	0.06048
	463.5	0.2409	0.2426	0.2426	0.2392	0.1455	0.0916333	0.09376	0.0706533	0.0917733	0.06032
	464	0.2396	0.2412	0.2412	0.237467	0.143867	0.0907433	0.0928533	0.0699533	0.0910033	0.0596967
	464.5	0.2384	0.2401	0.2401	0.2356	0.141667	0.0894933	0.09162	0.06898	0.08984	0.0588067
	465	0.2374	0.2391	0.2391	0.2332	0.1389	0.0877933	0.08993	0.0676733	0.08827	0.0576367
	465.5	0.2368	0.2385	0.2385	0.2303	0.135567	0.0857233	0.08782	0.0660333	0.0862567	0.05626
	466	0.2364	0.2382	0.2382	0.2265	0.131667	0.0833067	0.08535	0.06423	0.08385	0.0547067
	466.5	0.2358	0.2375	0.2375	0.221	0.127333	0.08064	0.0826333	0.0622833	0.0813133	0.0530733
	467	0.2356	0.2371	0.2371	0.214467	0.122767	0.0778467	0.0798767	0.0602467	0.07865	0.0513933
	467.5	0.2358	0.2374	0.2374	0.207	0.118033	0.07494	0.0769833	0.05805	0.0758333	0.0495667
	468	0.2357	0.2373	0.2373	0.1984	0.113033	0.0719433	0.07386	0.0556533	0.0728133	0.0475967
	468.5	0.2353	0.2369	0.2369	0.1893	0.107777	0.0687833	0.07055	0.05312	0.06963	0.0454733
	469	0.2349	0.2365	0.2365	0.1802	0.102533	0.0655633	0.0672	0.0506	0.06645	0.0433067
	469.5	0.2345	0.236	0.235567	0.171533	0.09747	0.0623933	0.0639833	0.0481933	0.0633767	0.0412367
	470	0.234	0.2355	0.233767	0.163333	0.0927333	0.0593933	0.0609433	0.04587	0.0604467	0.0392633
	470.5	0.2334	0.235	0.2305	0.155633	0.0883467	0.0566433	0.05814	0.0437467	0.0576967	0.0374433
	471	0.2326	0.2343	0.225	0.148567	0.0843633	0.0541233	0.05553	0.0417633	0.0551567	0.03576
	471.5	0.2319	0.2334	0.217767	0.1418	0.0805333	0.05171	0.0530533	0.03991	0.05272	0.0341433
	472	0.2306	0.2321	0.2089	0.135467	0.0768667	0.0493733	0.0506667	0.0381433	0.05037	0.03264
	472.5	0.2291	0.2305	0.1998	0.129633	0.0734033	0.0471533	0.0484133	0.0364533	0.04815	0.0312367
	473	0.2275	0.2288	0.191267	0.124133	0.0702033	0.0451433	0.0463367	0.0348633	0.04612	0.0299833
	473.5	0.2265	0.227733	0.183867	0.119333	0.0674533	0.0433767	0.0445133	0.0334733	0.0443433	0.0288433
	474	0.2257	0.2263	0.177033	0.1149	0.0649233	0.0418067	0.0428267	0.0322033	0.0426967	0.0277633
	474.5	0.225	0.224333	0.170867	0.1108	0.0625867	0.04037	0.04128	0.0310433	0.0411533	0.0267667
	475	0.224	0.221633	0.1652	0.107177	0.0604533	0.03906	0.03987	0.03002	0.0397433	0.0258133
	475.5	0.2222	0.217767	0.159733	0.103687	0.0583867	0.03779	0.0385267	0.0289767	0.0383967	0.0249533
	476	0.2205	0.213333	0.154567	0.100313	0.05648	0.0365567	0.0372667	0.0280067	0.0371867	0.0241467
	476.5	0.2194	0.208133	0.149733	0.0972033	0.05476	0.03539	0.0360767	0.02709	0.0360733	0.02343
	477	0.2187	0.202467	0.145267	0.09425	0.0531333	0.0343367	0.03499	0.0262667	0.0349733	0.0227267
	477.5	0.2177	0.196267	0.1408	0.0914033	0.05152	0.0333033	0.0339167	0.0254767	0.03389	0.0219767
	478	0.2158	0.190033	0.136367	0.08861	0.0498567	0.0322767	0.0328333	0.02469	0.0327633	0.02118
	478.5	0.2135	0.183833	0.132067	0.08576	0.04819	0.0312033	0.0317433	0.02389	0.0317033	0.0204333
	479	0.2114	0.1779	0.127833	0.0828933	0.0465667	0.0301533	0.0306733	0.0231167	0.03071	0.0197467
	479.5	0.209967	0.172167	0.123767	0.08007	0.0450467	0.02912	0.02966	0.0223567	0.0297233	0.0191433
	480	0.207933	0.166333	0.119633	0.0772567	0.0435	0.0281433	0.02861	0.0215833	0.0286867	0.0185167
	480.5	0.2045	0.1602	0.115233	0.07444	0.0418967	0.02715	0.02754	0.02081	0.0275767	0.0178267
	481	0.1994	0.153867	0.1106	0.07156	0.0401933	0.02615	0.0264333	0.0199867	0.0264233	0.0170733
	481.5	0.193367	0.147533	0.105983	0.0686033	0.03842	0.0251167	0.02535	0.0191567	0.0252867	0.0163167
	482	0.186767	0.1412	0.101413	0.06561	0.0366867	0.0240567	0.0242733	0.0183267	0.0241833	0.0156
	482.5	0.179833	0.1352	0.09714	0.0627833	0.0350967	0.0230133	0.02326	0.0175267	0.0231433	0.0149633
	483	0.1723	0.1292	0.0929067	0.0600567	0.0336233	0.0220033	0.0222567	0.0167733	0.0221233	0.0143167
	483.5	0.1645	0.1233	0.08877	0.0574167	0.03218	0.0210167	0.0212733	0.01601	0.0210933	0.0136633
	484	0.156767	0.117433	0.0846333	0.0547767	0.03071	0.0200667	0.02028	0.0152567	0.0200467	0.0129833
	484.5	0.149233	0.111767	0.0806767	0.0522	0.0292367	0.0191467	0.01929	0.0144967	0.0191	0.0123267
	485	0.142	0.1064	0.0769533	0.0497233	0.0278333	0.01826	0.01839	0.01382	0.0182033	0.01174
	485.5	0.135133	0.101393	0.07346	0.0474033	0.02652	0.0174167	0.01758	0.0132167	0.0173733	0.0112133
	486	0.128667	0.0966367	0.07012	0.0452467	0.02529	0.0166367	0.01685	0.0126833	0.0165433	0.0107133
	486.5	0.122567	0.0921267	0.0669433	0.0432733	0.0241767	0.01591	0.01615	0.01218	0.0157433	0.0102057
	487	0.1168	0.0877933	0.0639033	0.04145	0.0231433	0.0152267	0.0154167	0.0116533	0.0150233	0.00972067
	487.5	0.1114	0.08379	0.0611133	0.0396667	0.0221733	0.01459	0.0147133	0.0111267	0.0143867	0.00930167
	488	0.106333	0.08008	0.0585067	0.03798	0.0212867	0.014	0.0140733	0.01062	0.0137867	0.00890967
	488.5	0.10158	0.0767133	0.05613	0.03642	0.02043	0.01343	0.01351	0.010167	0.01322	0.00858967
	489	0.09707	0.0735567	0.0539233	0.03499	0.0196233	0.01294	0.0130067	0.00976233	0.0126633	0.00825833
	489.5	0.0929133	0.0705467	0.05185	0.0337367	0.0188867	0.01246	0.0125433	0.00940567	0.0121567	0.007923
	490	0.0890767	0.06772	0.0499	0.0326033	0.01822	0.0120167	0.0120833	0.009029	0.01168	0.007616
	490.5	0.0855967	0.06516	0.0481133	0.0315667	0.01764	0.0116	0.0116733	0.008681	0.0112567	0.00733267
	491	0.0825133	0.0628867	0.0465067	0.0306433	0.01712	0.0112033	0.01129	0.008374	0.0109013	0.00710767
	491.5	0.0796167	0.0608033	0.0450667	0.0297533	0.01663	0.01085	0.01094	0.008112	0.010581	0.006936
	492	0.0768967	0.0588967	0.0437833	0.0289333	0.0162033	0.0105433	0.0106233	0.007909	0.010289	0.00675933
	492.5	0.0743333	0.0571233	0.04256	0.02818	0.0158333	0.010282	0.0103067	0.00771067	0.00999933	0.00660533
	493	0.0718733	0.0554067	0.0414033	0.02748	0.0154933	0.0100577	0.010028	0.00753967	0.00970867	0.006453
	493.5	0.06959	0.0537567	0.0402933	0.02682	0.01517	0.00985933	0.00978733	0.00737933	0.009437	0.00630567
	494	0.0674133	0.0521167	0.03923	0.0261833	0.01483	0.00965967	0.009583	0.007207	0.00920633	0.00614867
	494.5	0.06539	0.0506333	0.0382833	0.0256267	0.0145133	0.00945633	0.009411	0.00704167	0.00899067	0.00599733
	495	0.06351	0.0493667	0.03741	0.0251033	0.0142333	0.009252	0.009237	0.006897	0.00880033	0.00587833
	495.5	0.06171	0.0481733	0.03658	0.0246333	0.01399	0.00905867	0.00905833	0.00677767	0.00859667	0.005769
	496	0.0599067	0.04694	0.0357967	0.0241667	0.0137533	0.008883	0.00887533	0.00665667	0.00837933	0.00565867
	496.5	0.0581467	0.0456433	0.0349667	0.02368	0.0134967	0.008732	0.00869333	0.00653033	0.008167	0.005557
	497	0.0563333	0.04428	0.03408	0.0231733	0.0132167	0.008551	0.00851133	0.00639533	0.00794533	0.00546433
	497.5	0.05456	0.0429633	0.03319	0.0226833	0.0129533	0.00839267	0.008332	0.00626467	0.007733	0.00540333
	498	0.0527733	0.0417367	0.0323067	0.0221967	0.0126967	0.008224	0.00814233	0.00611933	0.007544	0.005334
	498.5	0.0510367	0.0405833	0.03148	0.0216867	0.0124467	0.00806	0.007939	0.00596067	0.00739833	0.00523267
	499	0.04932	0.03946	0.0306667	0.0211333	0.01218	0.00789267	0.00774267	0.005813	0.00725033	0.00511467
	499.5	0.04763	0.0382933	0.0298233	0.02057	0.0118833	0.00773033	0.007559	0.00570133	0.00708167	0.00500233
	500	0.0459533	0.0370733	0.0290067	0.02005	0.0115867	0.00756967	0.00740133	0.00560433	0.00687	0.00489333
	500.5	0.0443233	0.03586	0.0282067	0.0195633	0.01129	0.007423	0.00727233	0.005536	0.006667	0.00478633
	501	0.0427767	0.03468	0.0274233	0.01912	0.0110333	0.00726	0.00712467	0.00541233	0.00648867	0.00468867
	501.5	0.0412267	0.0335667	0.0267133	0.01869	0.01083	0.00708167	0.00698167	0.005281	0.00634767	0.00458767
	502	0.0396867	0.03246	0.0259733	0.01825	0.01064	0.00692367	0.00683667	0.005134	0.00620667	0.00452267
	502.5	0.03813	0.03139	0.0252333	0.0177367	0.010376	0.00679667	0.00669467	0.00498733	0.00608133	0.004453
	503	0.0365667	0.03028	0.02441	0.0171533	0.0100623	0.00670733	0.00654067	0.00487767	0.00595133	0.00434533
	503.5	0.0351167	0.0292033	0.0235967	0.01662	0.009735	0.006598	0.00639033	0.00474967	0.00581867	0.00423033
	504	0.0337167	0.0281633	0.0228367	0.0161567	0.009453	0.00644667	0.00623633	0.00464167	0.005675	0.00411567
	504.5	0.0323933	0.0271433	0.0220967	0.0157733	0.00924367	0.006245	0.006112	0.004537	0.005512	0.00404167
	505	0.0311667	0.0262067	0.02138	0.01537	0.00904433	0.006063	0.00599033	0.00442833	0.005346	0.00398933
	505.5	0.0299833	0.0252967	0.0206733	0.0149367	0.00885833	0.00594667	0.00587033	0.004337	0.005212	0.00390533
	506	0.02886	0.0244033	0.0199967	0.0144767	0.008644	0.005855	0.005756	0.004234	0.00507633	0.00379267
	506.5	0.02775	0.0235333	0.01936	0.01406	0.00843167	0.00574867	0.00566	0.004148	0.00495133	0.003695
	507	0.0267	0.0227567	0.0188167	0.01373	0.00822433	0.00563367	0.00556267	0.00407367	0.00483	0.003626
	507.5	0.02571	0.0220233	0.01829	0.0134267	0.00804233	0.00552633	0.005461	0.004009	0.00471933	0.00360333
	508	0.02477	0.02134	0.01779	0.0131267	0.00786733	0.005465	0.005373	0.00395933	0.00464333	0.00357267
	508.5	0.0239033	0.0206667	0.0172833	0.0128067	0.00770567	0.005424	0.00529933	0.00391367	0.004559	0.00352133
	509	0.02307	0.02001	0.0167933	0.0125133	0.00756133	0.005389	0.00524833	0.00385467	0.004486	0.003471
	509.5	0.0223067	0.0194	0.0163467	0.0122467	0.007422	0.00532067	0.005181	0.003787	0.00438933	0.00342767
	510	0.0215733	0.0188167	0.01593	0.012	0.00732267	0.00523133	0.005111	0.00372333	0.00429467	0.003366
	510.5	0.02086	0.0182633	0.01553	0.01178	0.00723067	0.00513367	0.00506667	0.003695	0.00420067	0.00330733
	511	0.0201967	0.0177467	0.01514	0.0115633	0.007118	0.00510567	0.005035	0.00367833	0.004129	0.00326433
	511.5	0.0195567	0.0172533	0.0147533	0.01139	0.00700433	0.00509667	0.00500333	0.00364333	0.00409933	0.00323833
	512	0.0189567	0.01679	0.0143833	0.01122	0.00687367	0.005084	0.004932	0.00356767	0.00408233	0.003238
	512.5	0.0184133	0.0163633	0.0140267	0.0110433	0.00676433	0.005061	0.004847	0.003501	0.00406433	0.00321533
	513	0.0178867	0.0159233	0.0136867	0.0108333	0.006681	0.004991	0.00479167	0.00347967	0.00401367	0.003204
	513.5	0.0173667	0.0154933	0.0133633	0.0106167	0.00660967	0.00492933	0.004778	0.00349133	0.00397367	0.00316867
	514	0.0168667	0.0150833	0.01305	0.0104077	0.006543	0.00488533	0.00476533	0.00349467	0.00393467	0.003125
	514.5	0.0163533	0.0147067	0.01277	0.0102183	0.00647433	0.004821	0.00475233	0.00345867	0.00391133	0.00309333
	515	0.01584	0.0143167	0.01248	0.0100357	0.006383	0.00477767	0.004715	0.00341933	0.003872	0.003042
	515.5	0.0153667	0.0139167	0.0121667	0.00982567	0.00626367	0.004741	0.00467767	0.003384	0.00384033	0.002995
	516	0.0148633	0.0134967	0.0118533	0.009629	0.00615733	0.004687	0.00464067	0.00336267	0.00382233	0.00295
	516.5	0.0144333	0.01313	0.01159	0.00942933	0.00604267	0.00465633	0.00458833	0.003327	0.00379833	0.00292
	517	0.014	0.0127833	0.01132	0.009248	0.00594467	0.00458967	0.004551	0.003285	0.00376767	0.002923
	517.5	0.0135867	0.01244	0.0110333	0.00904167	0.00582267	0.004537	0.00450367	0.003239	0.00371433	0.002903
	518	0.01318	0.0120733	0.0106833	0.00883467	0.005689	0.00450933	0.00444333	0.003215	0.00364333	0.002848
	518.5	0.0127633	0.0117133	0.0103433	0.008627	0.00556133	0.004473	0.00435533	0.00318333	0.003559	0.002803
	519	0.0123333	0.0113767	0.0100607	0.00840867	0.005438	0.00443967	0.004268	0.00314567	0.003495	0.002749
	519.5	0.0118933	0.0110267	0.00981	0.00819267	0.00535067	0.00437733	0.00420433	0.003114	0.00345233	0.00274267
	520	0.0114667	0.01069	0.00957667	0.00798067	0.00525867	0.004273	0.00415867	0.00307933	0.0034	0.00274533
	520.5	0.0110533	0.010326	0.009321	0.00777167	0.00515167	0.00414333	0.00410167	0.00303033	0.00337333	0.002733
	521	0.0106667	0.009967	0.00904667	0.007578	0.005012	0.00401833	0.00402933	0.002973	0.00331933	0.00268833
	521.5	0.0103077	0.009633	0.00877567	0.00736167	0.00485233	0.00393533	0.00395633	0.002908	0.00324567	0.002623
	522	0.00998133	0.00929267	0.008478	0.00714	0.00469067	0.00389667	0.00388567	0.00286433	0.00317033	0.002566
	522.5	0.009634	0.00897567	0.00819333	0.006954	0.00456033	0.00384133	0.00380767	0.00282033	0.00307267	0.00247133
	523	0.00930533	0.008696	0.007937	0.00677467	0.004441	0.003767	0.003719	0.00276367	0.00302333	0.002396
	523.5	0.00894733	0.00842933	0.00770667	0.00661733	0.00434533	0.00367267	0.00364933	0.00270333	0.00296567	0.00233
	524	0.00859467	0.00815767	0.00747367	0.00642133	0.00419967	0.00357167	0.00358133	0.00262	0.002886	0.00231167
	524.5	0.00826133	0.00786333	0.00719833	0.00619033	0.004026	0.00345433	0.00351533	0.00253267	0.00282	0.002289
	525	0.00793433	0.00756167	0.00690467	0.00596433	0.00384233	0.00333933	0.003423	0.002442	0.00275567	0.00222267
	525.5	0.00766233	0.00729933	0.00664733	0.00576167	0.00366733	0.003259	0.00332433	0.00235233	0.00271033	0.00212533
	526	0.007414	0.00704533	0.00641733	0.00559233	0.00354433	0.00318433	0.00323867	0.00228433	0.002662	0.00204167
	526.5	0.007186	0.00679933	0.00619433	0.00540733	0.003395	0.00311833	0.00317533	0.00224967	0.002598	0.00197033
	527	0.00697367	0.006569	0.00597167	0.00521167	0.00325033	0.00304433	0.00311767	0.00223067	0.00252967	0.001925
	527.5	0.00673033	0.00635167	0.00576333	0.00502667	0.00312	0.00297967	0.00304533	0.00221433	0.00246367	0.00191033
	528	0.006489	0.00615067	0.00562	0.00486733	0.00301333	0.00292833	0.002953	0.00216967	0.002413	0.00186333
	528.5	0.00627233	0.00596033	0.00548733	0.004738	0.00292333	0.00285933	0.002845	0.00208833	0.00236833	0.00177867
	529	0.006076	0.00575367	0.005338	0.00461933	0.002817	0.002762	0.00274533	0.00200333	0.00230667	0.001676
	529.5	0.005891	0.005587	0.00517133	0.004502	0.002704	0.00265467	0.00265267	0.00190933	0.002222	0.001607
	530	0.00567567	0.00535233	0.004925	0.00435133	0.00259133	0.00255867	0.00260233	0.00183833	0.00214167	0.00155833
	530.5	0.00545467	0.00513133	0.004692	0.00418867	0.002475	0.00247367	0.00256233	0.00180033	0.00206633	0.001517
	531	0.00524067	0.00499633	0.00453733	0.00405867	0.00237867	0.002421	0.00254767	0.001779	0.00203667	0.00147467
	531.5	0.00504767	0.004905	0.004435	0.00397	0.00229633	0.002365	0.00249533	0.00174833	0.00201967	0.00145133
	532	0.004874	0.004858	0.00438333	0.00390833	0.00223833	0.00229967	0.00241667	0.001698	0.002004	0.00143733
	532.5	0.00475633	0.00470967	0.004241	0.003808	0.00218033	0.002226	0.00232167	0.00160667	0.00196933	0.001374
	533	0.00466	0.00453267	0.00408333	0.00364967	0.00208333	0.00212067	0.00221567	0.001521	0.00192067	0.00129267
	533.5	0.00455933	0.004375	0.003947	0.003484	0.00197967	0.00204933	0.002132	0.00143833	0.00188133	0.00123233
	534	0.00442833	0.00425267	0.00384733	0.00335333	0.00188033	0.00198167	0.00206033	0.00137367	0.00179533	0.001211
	534.5	0.00428667	0.00417967	0.00379933	0.00328133	0.00181633	0.001934	0.002019	0.00134767	0.001696	0.00118667
	535	0.00412333	0.00410733	0.00373533	0.00321867	0.00176533	0.001904	0.002003	0.001316	0.00158	0.00112567
	535.5	0.00397533	0.00403067	0.00366767	0.003128	0.001692	0.00188033	0.001959	0.00128	0.00149267	0.00106867
	536	0.00384933	0.003922	0.003558	0.00301933	0.0016	0.00186067	0.00188067	0.00122267	0.00143433	0.00101437
	536.5	0.00376367	0.00379433	0.00343167	0.002898	0.00148033	0.00180333	0.00178267	0.001153	0.001385	0.000984167
	537	0.00369567	0.003666	0.003283	0.00284733	0.00141033	0.00172367	0.001698	0.00111767	0.00135733	0.000934133
	537.5	0.00359967	0.00353467	0.003143	0.00280233	0.00134733	0.001633	0.001629	0.00106133	0.00133633	0.0008558
	538	0.00350967	0.00340033	0.00301167	0.00273467	0.00130067	0.00154633	0.00158367	0.00102263	0.00133433	0.000767533
	538.5	0.003431	0.00327233	0.002894	0.00263867	0.00123633	0.001483	0.001519	0.000957	0.00130633	0.0006818
	539	0.00336667	0.00317	0.002795	0.002524	0.00117467	0.00143267	0.00147067	0.000906367	0.00127533	0.0005915
	539.5	0.00330733	0.00308767	0.00270233	0.00242767	0.001095	0.001382	0.001388	0.0008443	0.00121233	0.000469867
	540	0.00320067	0.00299467	0.00259333	0.00236333	0.001039	0.001302	0.00133167	0.000790967	0.00118133	0.000284833
	540.5	0.00311933	0.00291533	0.00249867	0.00228667	0.0009601	0.00119933	0.00128	0.0007305	0.001159	8.04467e-05
	541	0.00304167	0.002834	0.002407	0.00223333	0.000913767	0.00112033	0.00125667	0.000683867	0.00113833	1.144e-05
	541.5	0.00295733	0.00277067	0.00235133	0.00217233	0.0008555	0.00107333	0.00120933	0.000624167	0.00110467	1.377e-05
	542	0.00286767	0.002733	0.00231733	0.00212167	0.000814833	0.00108257	0.00116333	0.000583667	0.00104863	2.26367e-05
	542.5	0.002778	0.00268467	0.00227	0.00205933	0.000759167	0.00106843	0.00111083	0.0005501	0.00101193	2.215e-05
	543	0.00272167	0.00265533	0.00221533	0.00199633	0.0007163	0.00102633	0.00105963	0.0005201	0.000965867	1.501e-05
	543.5	0.00265367	0.00261067	0.002149	0.00193767	0.000677967	0.000968833	0.0010085	0.000486133	0.000926433	4.78e-06
	544	0.002564	0.002599	0.00212767	0.00187033	0.0006091	0.0009213	0.000928733	0.000414567	0.000862833	0
	544.5	0.00245433	0.00256467	0.002085	0.001771	0.000498133	0.0009128	0.000871767	0.000371867	0.000814	0
	545	0.002377	0.002489	0.00201033	0.001663	0.000371567	0.0008811	0.000843233	0.0003296	0.0008137	0
	545.5	0.002339	0.00237533	0.00190967	0.001558	0.0002574	0.000847333	0.000839167	0.000324267	0.000836767	0
	546	0.00231467	0.00225867	0.00182733	0.00149967	0.000216733	0.000804867	0.0008507	0.0003262	0.000846267	0
	546.5	0.00228767	0.00222467	0.00182867	0.001485	0.0002264	0.000769	0.000847667	0.000331967	0.000824033	0
	547	0.002233	0.002216	0.001855	0.00147067	0.0002502	0.000737667	0.0008501	0.0003346	0.000772167	0
	547.5	0.00218	0.00218433	0.001844	0.00147	0.000266633	0.000715967	0.000833533	0.0003336	0.0007212	6.86333e-05
	548	0.00212367	0.00208467	0.00175633	0.00146333	0.000271067	0.000716567	0.000847633	0.000347867	0.000698433	9.82567e-05
	548.5	0.00205533	0.00196567	0.00164233	0.00146533	0.000268367	0.0007489	0.000874767	0.000379633	0.000669467	0.00012759
	549	0.00198967	0.001881	0.00156233	0.00149767	0.000284733	0.000777733	0.000912433	0.000421533	0.000678367	0.0001523
	549.5	0.001936	0.00185067	0.00154967	0.00151433	0.000295533	0.000767267	0.0009206	0.000430633	0.000669967	0.000192633
	550	0.00188867	0.001854	0.00156	0.001515	0.000281433	0.0007213	0.0008703	0.0004001	0.000662833	0.000240133
	550.5	0.00180867	0.00183133	0.001548	0.00147567	0.0002411	0.000682867	0.0008028	0.0003446	0.0006696	0.000244633
	551	0.00174133	0.001806	0.001538	0.00141033	0.000185033	0.000656	0.0007462	0.000297733	0.000658567	0.000215233
	551.5	0.001706	0.00177533	0.00152433	0.00137933	0.0001755	0.0006525	0.0007037	0.000258367	0.000632567	0.0001784
	552	0.00171667	0.001774	0.00151567	0.00136	0.000181867	0.000620267	0.0006828	0.000230267	0.000601633	0.000176433
	552.5	0.00170967	0.00175333	0.00148567	0.001355	0.0001885	0.000574067	0.000665067	0.0002204	0.000566967	0.000176633
	553	0.00170433	0.00167933	0.00139933	0.00129533	0.000125	0.000525567	0.000669	0.000234633	0.000556433	0.0001738
	553.5	0.00170467	0.00163767	0.00135333	0.001245	6.543e-05	0.000490233	0.000666867	0.000252967	0.000551233	0.0001856
	554	0.00169	0.001583	0.001291	0.00120933	3.84533e-05	0.0004866	0.000662133	0.000240133	0.000533833	0.000199733
	554.5	0.00164767	0.001595	0.001277	0.00121867	4.12567e-05	0.000514567	0.0006502	0.000209267	0.000512267	0.0002054
	555	0.00159633	0.00157467	0.00126333	0.001235	5.73633e-05	0.000532567	0.0006416	0.0001809	0.0004808	0.000185567
	555.5	0.001562	0.001556	0.00127533	0.00121533	3.841e-05	0.000531067	0.000618433	0.000154033	0.0004571	0.000165033
	556	0.001546	0.00154833	0.001301	0.001174	1.34467e-05	0.000503367	0.0005975	0.0001316	0.000422533	0.000166967
	556.5	0.00153467	0.00153167	0.001286	0.001128	0	0.000462933	0.000578133	0.0001078	0.000389	0.000182667
	557	0.00149333	0.00151933	0.001247	0.00109767	0	0.000463	0.000569567	9.63367e-05	0.000368067	0.0001839
	557.5	0.00145567	0.00149633	0.00119533	0.00109867	0	0.0004599	0.0005524	9.65433e-05	0.000387933	0.000178
	558	0.00142667	0.001484	0.00116533	0.00111	0	0.000457333	0.000523267	9.799e-05	0.0004327	0.0001458
	558.5	0.00140533	0.00146067	0.00115267	0.00109467	0	0.000451967	0.000485633	0.000101157	0.000455533	0.000115563
	559	0.001354	0.00145933	0.00117667	0.00105033	0	0.000440933	0.000480067	8.72233e-05	0.000419033	7.17167e-05
	559.5	0.00130533	0.00141867	0.001177	0.000979667	0	0.000436833	0.0004943	6.66767e-05	0.0003703	6.89433e-05
	560	0.001249	0.001381	0.001172	0.000949233	0	0.000432367	0.000498667	2.422e-05	0.000351133	9.16833e-05
	560.5	0.00123233	0.00131833	0.00113333	0.000932833	0	0.000410433	0.000503667	6.22667e-08	0.0003782	0.000116073
	561	0.00121067	0.001247	0.001077	0.000906733	0	0.000401367	0.000481133	4.85e-06	0.000389033	0.000126047
	561.5	0.00117333	0.00117867	0.00102733	0.0008796	0	0.000359767	0.000454733	1.50733e-05	0.000374267	0.0001211
	562	0.0011083	0.00116233	0.00100813	0.0008608	0	0.000325267	0.0003986	1.38567e-05	0.0003251	0.0001252
	562.5	0.0010385	0.00120567	0.00102893	0.000847633	0	0.000293267	0.0003571	1.68267e-06	0.0003041	0.000122267
	563	0.000963167	0.001265	0.001049	0.000810067	0	0.000293733	0.000335467	0	0.000288367	7.06633e-05
	563.5	0.0009588	0.00126533	0.00100353	0.0007422	0	0.000302633	0.000357833	0	0.000293967	3.63193e-05
	564	0.000991033	0.00122967	0.000955033	0.000721767	0	0.0002827	0.0003484	0	0.0003135	2.47283e-05
	564.5	0.00102627	0.00117133	0.000892	0.0007439	0	0.0002623	0.000326933	0	0.000309333	3.71127e-05
	565	0.00100693	0.001108	0.0008373	0.0007387	0	0.000225333	0.000298533	0	0.000312433	3.36697e-05
	565.5	0.0009401	0.00103467	0.000775933	0.000716767	0	0.000176333	0.000279933	0	0.0003288	2.044e-05
	566	0.000877433	0.000986633	0.000750567	0.000674633	0	0.000144667	0.000286767	0	0.0003489	9.18667e-06
	566.5	0.000851167	0.000968567	0.000757867	0.000671467	0	0.000156267	0.000291567	0	0.000328967	1.74067e-05
	567	0.000833533	0.0009948	0.0007951	0.000684567	0	0.0001697	0.000293633	0	0.0002485	1.997e-05
	567.5	0.000837367	0.00101027	0.0007896	0.0006735	0	0.0002144	0.000269267	0	0.000173433	1.38e-05
	568	0.0008698	0.00100707	0.000773267	0.000641467	0	0.000227767	0.000250933	0	0.000160503	2.20283e-05
	568.5	0.000885	0.00100293	0.000760367	0.0006215	0	0.000240867	0.000259567	0	0.000149817	4.16733e-05
	569	0.0008556	0.000990367	0.000731133	0.000637067	0	0.000216467	0.0002738	0	0.000158633	1.82563e-05
	569.5	0.0008301	0.00101787	0.0007494	0.000694033	0	0.000170043	0.000264833	0	0.0001542	1.30857e-05
	570	0.000838433	0.00106157	0.000781767	0.000719467	0	0.00015906	0.000254	0	0.0001666	1.841e-05
	570.5	0.000855	0.0010784	0.000808833	0.0006943	0	0.000180517	0.000262667	0	0.0001884	3.49e-05
	571	0.000859533	0.00106203	0.000802567	0.000653433	0	0.000192267	0.000269867	0	0.00015825	3.96667e-05
	571.5	0.000832767	0.00104767	0.000795333	0.000631133	0	0.00020349	0.000237167	0	0.000154003	2.79567e-05
	572	0.000811533	0.00103133	0.000770933	0.000629833	0	0.000149693	0.0002049	0	0.00012768	1.193e-06
	572.5	0.0007679	0.00100727	0.000749233	0.000607867	0	0.00011028	0.000209067	0	0.000132133	0
	573	0.0007253	0.000956467	0.000697867	0.000537333	0	6.46997e-05	0.000228267	0	0.000143607	0
	573.5	0.0007102	0.000920933	0.0006847	0.0004823	0	6.07233e-05	0.00022309	0	0.000146177	0
	574	0.0007018	0.000896	0.0006801	0.0004654	0	8.18033e-05	0.00021298	0	0.00013157	0
	574.5	0.000688033	0.000858567	0.000641533	0.0004673	0	0.000102346	0.000225717	0	9.16033e-05	0
	575	0.000666567	0.0007916	0.0005798	0.000482433	0	0.00011927	0.000253	0	7.343e-05	0
	575.5	0.000644067	0.000753567	0.000527167	0.0004846	0	0.000126943	0.0002548	0	9.77733e-05	0
	576	0.000641333	0.0007656	0.0005615	0.000510233	0	0.000110363	0.000235133	0	0.000116587	0
	576.5	0.0006153	0.000754033	0.000572667	0.0005345	0	0.000107077	0.000195967	0	0.000162783	0
	577	0.0005899	0.000763933	0.0005973	0.0005214	0	0.000109553	0.000141847	0	0.000142273	0
	577.5	0.000560033	0.000720333	0.000554133	0.0005039	0	0.000104303	0.000104837	0	0.000109883	0
	578	0.000506233	0.0006897	0.000507233	0.000459233	0	9.985e-05	7.85167e-05	0	8.46967e-05	0
	578.5	0.0004864	0.0006674	0.0004619	0.0004143	0	8.77467e-05	7.85767e-05	0	0.000100593	0
	579	0.000465167	0.0006589	0.0004278	0.000372433	0	7.78367e-05	5.99433e-05	0	0.0001362	0
	579.5	0.000494833	0.0006495	0.0004162	0.000338167	0	7.57767e-05	6.324e-05	0	0.0001411	0
	580	0.000553433	0.000638267	0.000422167	0.000362067	0	6.06933e-05	6.55167e-05	0	0.000121433	0
	580.5	0.0005946	0.0006143	0.000438967	0.000373667	0	3.17433e-05	6.63567e-05	0	7.39533e-05	0
	581	0.000590233	0.0006187	0.000458533	0.0004109	0	4.11467e-06	5.35533e-05	0	5.21033e-05	0
	581.5	0.0005181	0.000626067	0.0004733	0.0003871	0	0	3.98337e-05	0	4.28333e-05	0
	582	0.000439067	0.000654033	0.0004986	0.000342067	0	0	6.023e-05	0	5.39107e-05	0
	582.5	0.0004224	0.0006687	0.000511633	0.0003236	0	1.65633e-05	8.55333e-05	0	0.000108893	0
	583	0.000441967	0.000696733	0.0005331	0.000322033	0	4.2e-05	0.000102496	0	0.000124623	0
	583.5	0.000467533	0.0007104	0.000518833	0.000373467	0	3.75503e-05	0.00010338	0	0.0001023	0
	584	0.0004555	0.000748833	0.000525	0.000361767	0	1.684e-05	9.65633e-05	0	6.28233e-05	0
	584.5	0.000417267	0.0007428	0.000518567	0.000326467	0	7.09e-06	9.951e-05	0	6.98533e-05	0
	585	0.000370233	0.0007248	0.000497833	0.000279067	0	0	0.000121843	0	0.000107267	0
	585.5	0.0003423	0.000674433	0.0004556	0.0002581	0	0	0.000118153	0	0.0001308	0
	586	0.0003298	0.000640267	0.000414833	0.000273667	0	0	0.000116757	0	0.00010323	0
	586.5	0.000368067	0.000605367	0.000378567	0.000296667	0	4.16333e-06	7.36367e-05	0	7.54167e-05	0
	587	0.0003893	0.0005838	0.000354167	0.0003369	0	2.93667e-05	6.541e-05	0	5.82233e-05	0
	587.5	0.000384533	0.000570233	0.0003573	0.000366833	0	4.02e-05	6.813e-05	0	3.95667e-05	0
	588	0.000348833	0.0005457	0.000369067	0.000349467	0	3.42333e-05	6.982e-05	0	2.45377e-05	0
	588.5	0.000303967	0.000527433	0.000373167	0.000284433	0	2.37433e-05	8.099e-05	0	3.11567e-05	0
	589	0.000312267	0.0005039	0.000330333	0.000220467	0	1.77767e-05	7.938e-05	0	3.66333e-05	0
	589.5	0.000297267	0.000467333	0.0002522	0.0002193	0	1.71867e-05	8.89577e-05	0	3.23333e-05	0
	590	0.000269133	0.000427567	0.000199	0.000260633	0	1.06733e-05	9.18333e-05	0	8.45667e-06	0
	590.5	0.000203813	0.000394233	0.000159667	0.0002864	0	2.428e-06	8.12867e-05	0	0	0
	591	0.000177833	0.0004153	0.000170133	0.0002747	0	0	6.07267e-05	0	8.38667e-06	0
	591.5	0.000163633	0.000452567	0.000191767	0.000291	0	0	4.2898e-05	0	3.94533e-05	0
	592	0.00015697	0.000494667	0.000208567	0.0002638	0	0	2.54433e-05	0	9.189e-05	1.99367e-06
	592.5	0.000149817	0.000494033	0.000226833	0.000249633	0	0	1.61367e-05	0	7.05573e-05	0
	593	0.000197233	0.0004802	0.000225267	0.000243	0	2.80933e-06	1.0326e-05	0	5.2597e-05	0
	593.5	0.000210567	0.000433967	0.0002171	0.0002809	0	1.69467e-05	3.71133e-05	0	4.07333e-05	0
	594	0.000206033	0.0004143	0.0002177	0.0003287	0	1.94167e-05	2.819e-05	0	3.43e-05	0
	594.5	0.000146237	0.000445767	0.0002573	0.0003301	0	1.286e-05	1.3391e-05	0	2.27633e-05	0
	595	0.00012542	0.000517233	0.000324367	0.000297933	0	7.95667e-06	0	0	2.02167e-06	0
	595.5	0.000124277	0.000596633	0.000377667	0.000261067	0	1.42833e-05	0	0	0	0
	596	0.000129647	0.000592633	0.0003582	0.0001835	0	1.98167e-05	0	0	0	0
	596.5	0.00014344	0.0005794	0.000332233	0.000152133	0	2.21733e-05	8.22e-06	0	6.20667e-07	0
	597	0.000130343	0.0005336	0.000292533	0.000192667	0	1.033e-05	5.76667e-07	0	6.70667e-06	0
	597.5	0.000113767	0.000491367	0.0002688	0.0002342	0	4.27e-07	8.51667e-06	0	9.27667e-06	0
	598	9.64667e-05	0.000404733	0.000227433	0.0002124	0	0	6.57333e-06	0	7.73e-06	0
	598.5	8.29e-05	0.000346167	0.000213133	8.98333e-05	0	0	2.81063e-05	0	2.30067e-06	0
	599	9.22167e-05	0.0003359	0.000222433	3.70197e-05	0	0	7.053e-05	0	2.575e-06	0
	599.5	0.000141807	0.0003589	0.000229233	7.52533e-05	0	7.66333e-07	6.96967e-05	0	3.247e-05	0
	600	0.000183227	0.000369667	0.000214133	0.00012118	0	5.06e-07	6.408e-05	0	6.22533e-05	0
	600.5	0.000233	0.0003839	0.000232633	0.000185467	0	0	2.722e-05	0	5.28092e-05	0
	601	0.000217033	0.000397833	0.000248967	0.0001887	0	2.22833e-06	4.472e-05	0	5.86967e-05	0
	601.5	0.000197333	0.000401033	0.000262467	0.000164367	0	2.38067e-06	5.289e-05	0	5.51023e-05	0
	602	0.00012333	0.0004082	0.0002581	0.000124357	0	1.95533e-07	6.5505e-05	0	4.38033e-05	0
	602.5	6.33e-05	0.000418733	0.000259267	8.73667e-05	0	0	4.54717e-05	0	1.697e-05	0
	603	4.26e-05	0.0004843	0.0002976	9.81233e-05	0	0	1.646e-05	0	1.34983e-06	0
	603.5	2.50033e-05	0.000492967	0.0002806	0.00011689	0	0	0	0	0	0
	604	2.27067e-05	0.000486533	0.0002612	0.000158467	0	0	0	0	0	0
	604.5	2.52767e-05	0.000435533	0.0002458	0.000204233	0	0	0	0	6.24667e-06	0
	605	3.45333e-05	0.000359867	0.000220233	0.000207567	0	0	2.38767e-05	0	5.69e-06	0
	605.5	3.44e-05	0.0003254	0.000218867	0.0001964	0	9.61e-06	3.67483e-05	0	1.48533e-07	0
	606	3.26267e-05	0.000247367	0.00011744	0.000118853	0	3.226e-06	5.09567e-05	0	2.938e-06	0
	606.5	3.66667e-05	0.000221133	6.73667e-05	5.31337e-05	0	0	6.50833e-05	0	2.051e-05	0
	607	3.074e-05	0.000217133	5.464e-05	3.71267e-05	0	0	8.089e-05	0	3.18267e-05	0
	607.5	4.48333e-06	0.000279167	0.00013285	8.23433e-05	0	0	7.732e-05	0	1.345e-05	0
	608	0	0.000329467	0.0001911	0.000176733	0	0	6.79467e-05	0	0	0
	608.5	0	0.000328667	0.000192367	0.0002141	0	0	7.62767e-05	0	0	0
	609	0	0.0002994	0.000143867	0.000195867	0	0	9.542e-05	0	0	0
	609.5	0	0.0003155	0.000127367	0.00011793	0	0	7.755e-05	0	4.01e-06	0
	610	1.68533e-05	0.000318567	9.34267e-05	3.34333e-05	0	0	4.80967e-05	0	4.89667e-06	0
	610.5	3.80333e-05	0.000293167	1.276e-05	8.00333e-07	0	0	2.683e-05	0	0	0
	611	5.42333e-05	0.000256633	0	5.96667e-07	0	0	6.62667e-06	0	0	0
	611.5	6.69372e-05	0.0002975	8.28667e-08	2.337e-05	0	0	0	0	8.28867e-07	0
	612	6.43067e-05	0.0003526	3.37867e-05	5.43167e-05	0	0	0	0	3.0992e-05	0
	612.5	2.81633e-05	0.000380233	8.45933e-05	0.00010902	0	0	0	0	6.58467e-05	0
	613	0	0.000346033	0.000101747	0.000181567	0	0	0	0	4.59868e-05	0
	613.5	0	0.000299633	6.473e-05	0.000184333	0	0	1.48333e-06	0	3.76333e-05	0
	614	8.04667e-07	0.000272767	6.277e-05	0.000148533	0	0	1.491e-06	0	4.32167e-05	0
	614.5	2.26033e-05	0.0003082	8.90533e-05	7.93333e-05	0	0	1.38633e-05	0	5.72733e-05	0
	615	2.9637e-05	0.000370967	0.00013895	4.90667e-05	0	0	9.46333e-06	0	7.816e-05	0
	615.5	1.87367e-06	0.000392767	0.000129553	3.125e-05	0	0	9.06667e-08	0	6.88013e-05	0
	616	0	0.000304033	3.57833e-05	1.71933e-06	0	0	1.509e-06	0	7.07263e-05	0
	616.5	0	0.000177967	0	0	0	5.97333e-06	4.96667e-06	0	6.82133e-05	0
	617	0	4.733e-05	0	0	0	3.18167e-05	1.87283e-05	0	7.763e-05	0
	617.5	0	2.30567e-05	0	0	0	3.10533e-05	1.703e-05	0	4.329e-05	0
	618	0	3.62727e-05	0	0	0	1.70233e-05	9.41e-06	0	2.51433e-05	0
	618.5	0	0.000116093	3.018e-05	3.65867e-05	0	4.54333e-07	4.54333e-06	0	9.24e-06	0
	619	0	0.0001788	4.51533e-05	0.000109227	0	0	0	0	0	0
	619.5	0	0.000195533	1.5959e-05	9.83933e-05	0	0	4.85333e-06	0	0	0
	620	0	0.0002243	1.23767e-05	0.000101313	0	0	0	0	0	0
	620.5	0	0.000265933	1.88487e-05	0.000156307	0	1.35467e-05	5.21333e-06	0	5.35333e-08	0
	621	0	0.000330333	6.19167e-05	0.0002445	0	7.12667e-06	2.397e-06	0	1.89817e-05	0
	621.5	0	0.0003802	0.00012832	0.000257867	0	7.97667e-06	3.54667e-06	0	7.59533e-05	0
	622	0	0.000418467	0.0002131	0.000207067	0	1.09867e-05	8.4e-06	0	0.000144967	0
	622.5	0	0.000447467	0.000287567	0.00014965	0	2.195e-05	1.288e-05	0	0.000109667	0
	623	0	0.000445067	0.000275667	0.000165217	0	4.28667e-05	2.82133e-05	0	4.10033e-05	0
	623.5	0	0.0003708	0.000177333	0.000177457	0	5.27333e-05	4.29667e-05	0	3.90667e-06	0
	624	0	0.000298	0.000106787	0.000215967	0	4.39e-05	5.6219e-05	0	2.962e-06	0
	624.5	0	0.000210567	8.088e-05	0.0001834	0	1.42267e-05	5.75067e-05	0	2.92933e-05	0
	625	0	0.00015744	8.133e-05	0.000168767	0	1.93533e-06	3.43133e-05	0	5.37333e-05	0
	625.5	0	0.000128707	7.134e-05	0.000122097	0	0	3.52733e-05	0	9.19567e-05	0
	626	0	0.0001873	8.788e-05	0.00013465	0	0	6.383e-05	0	6.4778e-05	0
	626.5	0	0.0002003	8.59233e-05	0.000122867	0	0	8.78e-05	0	4.587e-05	0
	627	0	0.0001953	8.1427e-05	0.0001298	0	3.99e-07	6.54462e-05	0	5.01633e-05	0
	627.5	0	0.00016194	4.4102e-05	0.000148477	0	2.42767e-05	5.01667e-05	0	4.04447e-05	0
	628	0	0.000196803	5.46533e-05	0.000166437	0	2.19367e-05	6.8653e-05	0	7.43467e-05	0
	628.5	0	0.0002482	0.000106337	0.0002351	0	5.05e-06	0.000112473	0	8.37033e-05	0
	629	0	0.0002304	8.593e-05	0.0002354	0	0	0.0001762	0	9.25667e-05	0
	629.5	0	0.0002187	5.54877e-05	0.000214967	0	1.329e-05	0.0002135	0	7.10033e-05	0
	630	0	0.000210933	3.62667e-05	0.000127183	0	2.153e-05	0.000242433	0	0.000124513	0
	630.5	0	0.000237	6.112e-05	0.000110193	0	2.522e-05	0.000210933	0	0.000198067	0
	631	0	0.0002834	8.20733e-05	0.00013028	0	3.84667e-05	0.000153247	0	0.000285533	0
	631.5	0	0.0002894	5.572e-05	0.0002217	0	2.52233e-05	0.00011709	0	0.0002981	0
	632	0	0.0003117	4.03567e-05	0.0002825	0	1.65733e-05	0.000134255	0	0.0003168	0
	632.5	0	0.0003822	0.000127433	0.000334933	0	4.27333e-07	0.000187443	0	0.0002574	0
	633	0	0.000492033	0.0002845	0.000347167	0	3.462e-05	0.000210733	0	0.000169297	0
	633.5	0	0.000558267	0.000381267	0.000267167	0	5.277e-05	0.000204767	0	9.66667e-05	0
	634	0	0.000547	0.0003769	0.000188267	0	6.39367e-05	0.00017261	0	8.92e-05	0
	634.5	0	0.000516267	0.0003328	0.000152537	0	8.1378e-05	0.000171933	0	0.00014185	0
	635	0	0.0004673	0.000313033	0.000282467	0	0.000111797	0.000224967	0	0.000221833	2.91033e-06
	635.5	0	0.0004319	0.000320867	0.000427367	0	0.000129733	0.000318967	0	0.000274633	2.17067e-05
	636	1.08333e-05	0.000408	0.000331533	0.000552867	0	0.00010715	0.000404033	0	0.000308133	3.21753e-05
	636.5	3.596e-05	0.000416867	0.000369533	0.0006053	0	0.000127303	0.000443233	0	0.000311233	3.91373e-05
	637	8.26867e-05	0.000461833	0.0004153	0.000613467	0	0.0002081	0.000442467	0	0.000337833	2.595e-05
	637.5	7.17633e-05	0.000499	0.000450667	0.000620633	0	0.000290133	0.0004761	0	0.0003985	5.78e-06
	638	0.000109143	0.0005167	0.000452067	0.0006436	0	0.000275	0.000521467	0	0.000478333	0
	638.5	0.000118677	0.000522067	0.000437167	0.000702667	0	0.000250033	0.0005448	0	0.000596133	0
	639	0.000143363	0.000609467	0.000532267	0.000811533	0	0.0002802	0.000532233	0	0.0006516	2.88067e-07
	639.5	0.000154533	0.0007729	0.000703267	0.000939767	0	0.000343367	0.000491267	0	0.000622533	4.612e-05
	640	0.000142667	0.0009001	0.000866	0.0010075	0	0.000395267	0.000470733	0	0.000618867	0.00015014
	640.5	0.000159333	0.000909	0.0008872	0.0010088	0	0.000435733	0.000467767	0	0.0006391	0.0002352
	641	0.000186463	0.000897067	0.000833933	0.000954333	0	0.000463533	0.000517767	0	0.000674567	0.000237467
	641.5	0.000278067	0.000879233	0.000796967	0.0009156	0	0.0005462	0.000575233	3.41167e-05	0.000684367	0.00017872
	642	0.000432967	0.000937433	0.0008713	0.000861167	0	0.000584	0.000644567	9.171e-05	0.000769733	9.7678e-05
	642.5	0.0005255	0.0009882	0.0009933	0.000875833	0	0.00067	0.000708333	0.000105843	0.000897967	0.00012077
	643	0.000554433	0.0010648	0.00110367	0.0010175	0	0.0007228	0.000788967	0.000119913	0.0010133	0.000213
	643.5	0.000544467	0.00113133	0.00119567	0.00123967	0	0.000812	0.000918567	0.0001998	0.00104737	0.0003021
	644	0.000606	0.00119133	0.00122733	0.00146833	3.19467e-05	0.0008567	0.0010395	0.000321833	0.001079	0.000347333
	644.5	0.000774333	0.00126467	0.001249	0.00157533	0.000118277	0.000915933	0.00117033	0.0004472	0.00109	0.0003274
	645	0.000846367	0.001361	0.001303	0.001653	0.0002359	0.0009725	0.00129533	0.000528133	0.001126	0.0003382
	645.5	0.000924133	0.00148467	0.00140967	0.00168867	0.0003109	0.00109577	0.00145433	0.0006478	0.00120733	0.000372833
	646	0.000934133	0.001702	0.00164167	0.00168733	0.0003031	0.00125433	0.00156067	0.000737533	0.00129833	0.0004934
	646.5	0.00103593	0.00181433	0.001759	0.00165533	0.000307967	0.001453	0.00159833	0.000773267	0.00138467	0.000595067
	647	0.00113177	0.00189167	0.00185933	0.001714	0.0003713	0.00155833	0.00161833	0.000786867	0.001496	0.000638767
	647.5	0.001229	0.001904	0.00190333	0.001887	0.000526767	0.00162567	0.00168167	0.0008478	0.00161933	0.000683633
	648	0.001366	0.002003	0.00204367	0.00217067	0.000760333	0.00171033	0.001716	0.000938833	0.00172567	0.000794467
	648.5	0.001475	0.00211567	0.00218133	0.00232033	0.000924033	0.001823	0.00180967	0.001078	0.001818	0.0008759
	649	0.001605	0.00218733	0.00228733	0.00242167	0.001091	0.00194733	0.001893	0.00117167	0.00189667	0.000911567
	649.5	0.001745	0.00230667	0.00243267	0.002488	0.00124567	0.00199233	0.00209767	0.001322	0.00198933	0.000860333
	650	0.00190167	0.00247167	0.002664	0.002615	0.00139833	0.002103	0.00223667	0.00142033	0.002114	0.000861867
	650.5	0.00203533	0.002575	0.002798	0.00279167	0.00153367	0.00225467	0.00239167	0.00153333	0.002279	0.0008969
	651	0.00214667	0.00264933	0.00284367	0.00302767	0.00170133	0.00241667	0.00256733	0.001656	0.00243867	0.00108667
	651.5	0.00231367	0.002736	0.002898	0.00328167	0.001923	0.002558	0.002752	0.00176867	0.002601	0.00132067
	652	0.002499	0.00297133	0.00311	0.00344267	0.00212133	0.00266567	0.00292867	0.001889	0.00273567	0.00150467
	652.5	0.00272	0.00321467	0.00342633	0.00353333	0.002227	0.00282233	0.003026	0.00197033	0.002886	0.00157933
	653	0.00282167	0.00338567	0.00368633	0.00366367	0.00235733	0.002987	0.00313767	0.00204633	0.002935	0.00158533
	653.5	0.00297767	0.003456	0.00382	0.00386967	0.00259	0.00314967	0.003298	0.00218633	0.00298633	0.00153667
	654	0.00308667	0.00351767	0.003904	0.00410833	0.00284733	0.00334533	0.00349067	0.00237067	0.00308967	0.00153733
	654.5	0.00328267	0.00364767	0.00401233	0.00427733	0.00303967	0.00355867	0.00372167	0.002622	0.00331033	0.00165233
	655	0.00356633	0.003845	0.00422433	0.004513	0.003247	0.003762	0.00388633	0.002817	0.003571	0.001825
	655.5	0.00380833	0.00409733	0.00446067	0.004724	0.00343633	0.00394767	0.00405567	0.00297433	0.00386733	0.001948
	656	0.00401867	0.00431567	0.004694	0.00501233	0.00368733	0.004112	0.004223	0.00313267	0.00414867	0.00203033
	656.5	0.00409767	0.00456867	0.00496467	0.00532533	0.003978	0.004321	0.004441	0.00333167	0.00442967	0.00216433
	657	0.00438533	0.00484233	0.00526267	0.00567	0.00435033	0.004546	0.00464667	0.00354867	0.00458567	0.002373
	657.5	0.00474067	0.005139	0.00556767	0.00600733	0.00472933	0.004782	0.00482867	0.003729	0.004727	0.00261
	658	0.00510567	0.00549333	0.00592767	0.006271	0.005021	0.00496367	0.00504967	0.00395233	0.00487867	0.00282733
	658.5	0.00532133	0.00588233	0.00634567	0.006564	0.005317	0.00516667	0.005274	0.00412033	0.00517567	0.00308667
	659	0.00550867	0.00632533	0.00681333	0.006863	0.00559567	0.00549833	0.00551867	0.00429067	0.00546967	0.00322367
	659.5	0.00578	0.006652	0.007178	0.00725433	0.00592733	0.00599267	0.00579	0.00449333	0.00580667	0.003269
	660	0.00616967	0.00691433	0.007547	0.00767933	0.00633367	0.006479	0.00618233	0.00486933	0.006067	0.00328067
	660.5	0.00668367	0.007168	0.007917	0.008125	0.00682967	0.00685833	0.00658833	0.005275	0.006365	0.0034
	661	0.007231	0.007529	0.008375	0.00858233	0.00738833	0.00711733	0.00700633	0.00561933	0.006669	0.00362667
	661.5	0.00771267	0.007936	0.008832	0.009069	0.007965	0.00746133	0.007441	0.00596067	0.00711733	0.00383567
	662	0.00812467	0.00838433	0.009325	0.00965667	0.008585	0.00792033	0.007979	0.00634967	0.00758433	0.00412433
	662.5	0.00858667	0.00887667	0.00985533	0.010282	0.00923133	0.008484	0.00855067	0.00679167	0.00803067	0.004405
	663	0.00913867	0.00939067	0.0104	0.0109467	0.00988867	0.00901767	0.00912633	0.00722533	0.008493	0.00467733
	663.5	0.00980933	0.009974	0.0110267	0.01162	0.0106167	0.00950767	0.00960633	0.007645	0.00895267	0.004972
	664	0.0104553	0.01069	0.0118133	0.01238	0.0114333	0.0100277	0.010078	0.00808733	0.00945767	0.00537367
	664.5	0.0111283	0.0115833	0.01281	0.0131333	0.0122433	0.0106667	0.0105567	0.00855167	0.00995967	0.00578233
	665	0.0118	0.0124567	0.0138067	0.01386	0.01302	0.0114	0.0111067	0.00908933	0.0105933	0.00610467
	665.5	0.01265	0.0131867	0.0146333	0.01459	0.0138	0.01207	0.01174	0.009691	0.0112333	0.00634267
	666	0.01357	0.0137667	0.01533	0.01551	0.0147233	0.0127033	0.01243	0.0102733	0.0118467	0.006674
	666.5	0.01447	0.0144067	0.0161167	0.0165133	0.0157167	0.01336	0.0132	0.01091	0.0124167	0.007076
	667	0.0152467	0.01521	0.0170633	0.0174033	0.0166867	0.0141233	0.01398	0.0115933	0.01304	0.00754533
	667.5	0.0160967	0.01616	0.0181233	0.01822	0.01759	0.0150367	0.0148033	0.0123433	0.01378	0.008
	668	0.0170733	0.01713	0.01917	0.0191767	0.0185667	0.01594	0.01567	0.0130967	0.0146067	0.008453
	668.5	0.0180833	0.0180233	0.0201467	0.0204	0.0197033	0.0168467	0.01657	0.0137767	0.0155133	0.00892567
	669	0.01905	0.0189033	0.0211333	0.0216267	0.0209167	0.0176333	0.0175333	0.0145	0.0163433	0.009372
	669.5	0.0199833	0.0198433	0.02221	0.0227833	0.0221367	0.01846	0.0183933	0.0151567	0.0171133	0.009781
	670	0.02096	0.0209133	0.02341	0.0238433	0.0232967	0.0193733	0.01921	0.0159	0.0178767	0.0101437
	670.5	0.0220333	0.0220533	0.02458	0.02503	0.02453	0.0202967	0.0200767	0.01673	0.01876	0.0104887
	671	0.0232867	0.02319	0.02573	0.02634	0.0258633	0.02126	0.0209833	0.0176033	0.01973	0.0109
	671.5	0.0245567	0.0243433	0.0269933	0.02768	0.02724	0.0223067	0.02204	0.0185433	0.0207967	0.0114467
	672	0.0257933	0.0256	0.02847	0.02898	0.0286133	0.02337	0.02318	0.0195067	0.02188	0.0121
	672.5	0.02695	0.0268267	0.0299567	0.03025	0.03	0.0244567	0.02444	0.02062	0.02284	0.01277
	673	0.02831	0.02812	0.0314333	0.0316367	0.03149	0.0255967	0.0256233	0.02163	0.0237333	0.01344
	673.5	0.0297167	0.0293633	0.0327567	0.0332	0.0331467	0.02692	0.02668	0.0225867	0.0246733	0.01414
	674	0.0311433	0.0307733	0.03425	0.0348233	0.03479	0.0283267	0.0277933	0.0234933	0.0258333	0.01486
	674.5	0.0324967	0.03222	0.03586	0.03652	0.0364833	0.0297433	0.0289833	0.0245633	0.0270933	0.0155533
	675	0.0340167	0.0337767	0.0376567	0.0382	0.0382167	0.0311733	0.0303	0.0257333	0.0284633	0.0161267
	675.5	0.0356567	0.0352733	0.0394567	0.03994	0.0401267	0.0327133	0.0317067	0.0270267	0.0298067	0.0166933
	676	0.03735	0.0367933	0.0412167	0.0416533	0.04212	0.0342867	0.0331033	0.02831	0.03116	0.0173167
	676.5	0.0389733	0.0384533	0.0430733	0.0434533	0.0441233	0.0358667	0.03457	0.0296333	0.0325367	0.01805
	677	0.0406233	0.04019	0.0450067	0.0453967	0.0462	0.03737	0.03605	0.0308533	0.0339333	0.0189267
	677.5	0.0423233	0.0418933	0.0469367	0.04739	0.0482667	0.0388367	0.0376067	0.03207	0.03539	0.0198733
	678	0.0441033	0.0435567	0.0488667	0.0494	0.05035	0.04027	0.0392833	0.0333933	0.0368033	0.02091
	678.5	0.0460233	0.04535	0.0508467	0.0514767	0.0523967	0.0417733	0.0410267	0.03495	0.03829	0.02194
	679	0.04796	0.04713	0.0528533	0.0534833	0.0545	0.04343	0.0427567	0.03653	0.0397767	0.0228367
	679.5	0.04979	0.04886	0.0547067	0.0554067	0.0566	0.0452	0.0442633	0.0379733	0.0412467	0.0236433
	680	0.05133	0.05041	0.0564233	0.0570833	0.0585933	0.04688	0.0455333	0.0392	0.0426567	0.02434
	680.5	0.05268	0.0518033	0.0579467	0.05869	0.0603767	0.0483167	0.04672	0.0403167	0.0438367	0.0249733
	681	0.0539067	0.0529733	0.0592467	0.0600567	0.06193	0.04948	0.0478633	0.0413633	0.04483	0.02562
	681.5	0.0549333	0.05395	0.0603267	0.0612633	0.0633867	0.0505467	0.0491167	0.0424667	0.04566	0.0263233
	682	0.0556967	0.05493	0.06144	0.0622067	0.0646067	0.0514933	0.05003	0.04343	0.0464167	0.0270767
	682.5	0.0563433	0.05584	0.0623933	0.06295	0.0656433	0.05229	0.0508	0.0442133	0.0472433	0.0276667
	683	0.0568933	0.05664	0.06313	0.0634967	0.0664933	0.05292	0.0513067	0.0448067	0.0479833	0.0281467
	683.5	0.0572267	0.05706	0.0635033	0.0638667	0.0671367	0.0534333	0.0517433	0.04532	0.0485867	0.0285667
	684	0.05727	0.05702	0.06355	0.0639267	0.0672933	0.0538433	0.0519567	0.0458133	0.0487867	0.0288067
	684.5	0.0571633	0.0568233	0.06344	0.0637967	0.0671533	0.05397	0.0520733	0.0460633	0.04879	0.0290167
	685	0.0570333	0.05655	0.0632067	0.06362	0.06699	0.0538733	0.0522167	0.04616	0.04871	0.0292267
	685.5	0.0564667	0.0560567	0.0627867	0.0632867	0.0668867	0.05374	0.0521933	0.04609	0.0485833	0.0295267
	686	0.0556433	0.0553433	0.0620767	0.0625567	0.06648	0.0534833	0.05193	0.0459467	0.0483567	0.02955
	686.5	0.0545867	0.05459	0.0611267	0.0614867	0.0657533	0.05309	0.0513733	0.0457367	0.0479733	0.0293767
	687	0.0535067	0.0537767	0.06002	0.0602967	0.0647467	0.0525167	0.05073	0.04547	0.0474333	0.02916
	687.5	0.0522567	0.05276	0.0588433	0.0591767	0.0636767	0.0519	0.0499567	0.04515	0.0467867	0.0290933
	688	0.0509267	0.05152	0.0574967	0.0580133	0.0624967	0.0511667	0.0491867	0.04461	0.0461267	0.0290133
	688.5	0.0495633	0.0502567	0.0562333	0.0567933	0.0613467	0.0502033	0.0483533	0.0439033	0.0455067	0.02883
	689	0.0480167	0.04887	0.0547833	0.0553167	0.0601967	0.0492433	0.0475467	0.0431433	0.04482	0.0285033
	689.5	0.0464967	0.0475567	0.05342	0.0539233	0.0590167	0.0483867	0.04684	0.0425733	0.04401	0.0283167
	690	0.0450133	0.0462333	0.0519333	0.0526467	0.0577167	0.04761	0.0460533	0.0419233	0.0431067	0.0281833
	690.5	0.04358	0.0448933	0.05039	0.0513433	0.0562033	0.0466733	0.0450067	0.0410633	0.04214	0.02798
	691	0.0421167	0.04347	0.0488433	0.0499133	0.0547233	0.04568	0.04387	0.0401767	0.0412567	0.0276
	691.5	0.0406267	0.0421	0.04748	0.0484833	0.05337	0.04471	0.04293	0.0394767	0.04039	0.02726
	692	0.0392633	0.0408667	0.0463133	0.0471967	0.0521367	0.0438767	0.0422367	0.03889	0.0395367	0.0268967
	692.5	0.0377867	0.03953	0.04496	0.0457867	0.0508967	0.04299	0.0413867	0.03802	0.0387	0.0264967
	693	0.0364133	0.03816	0.0434333	0.04434	0.0496433	0.04213	0.0405133	0.0372167	0.03793	0.0261967
	693.5	0.0350533	0.0367633	0.0418133	0.0429967	0.0483867	0.0413267	0.03971	0.0366233	0.0372533	0.0260067
	694	0.0339367	0.0356833	0.04054	0.0419867	0.04725	0.04065	0.0390533	0.03631	0.0367067	0.0258567
	694.5	0.03281	0.03477	0.0395667	0.04101	0.0461933	0.0400267	0.0384067	0.0358667	0.0362967	0.0255633
	695	0.0316933	0.03401	0.0387633	0.04001	0.0451367	0.03939	0.03781	0.03539	0.03592	0.0251933
	695.5	0.03049	0.0331367	0.0378767	0.0391	0.0441233	0.0386767	0.0372367	0.0348733	0.03535	0.02483
	696	0.02937	0.03224	0.03681	0.0382	0.0431467	0.0379	0.03667	0.0344167	0.0346333	0.0245567
	696.5	0.0284167	0.0312467	0.0356667	0.0372167	0.0421833	0.0372233	0.0359767	0.0339333	0.0338933	0.0244133
	697	0.0276567	0.03017	0.0344433	0.0361033	0.0412033	0.0367133	0.0354033	0.0335467	0.0332867	0.02424
	697.5	0.0268767	0.0291033	0.0333167	0.0351033	0.0401933	0.03629	0.0348867	0.0331833	0.03285	0.0240333
	698	0.02607	0.0282433	0.03243	0.03437	0.0394167	0.0357233	0.03439	0.0327933	0.03243	0.0238233
	698.5	0.0252033	0.02764	0.0317733	0.0338067	0.0388233	0.0351	0.0337933	0.03238	0.03211	0.0236833
	699	0.0244633	0.0272333	0.03127	0.0332267	0.0383033	0.0344767	0.0333033	0.03201	0.0319267	0.0235833
	699.5	0.0237433	0.0266667	0.0305967	0.03249	0.0375933	0.0339433	0.0328667	0.0317233	0.0317267	0.02338
	700	0.0231133	0.0260567	0.0299067	0.0317267	0.0367867	0.0334267	0.0324133	0.03138	0.0313033	0.0233467
	700.5	0.0225967	0.0253133	0.02909	0.03108	0.0360467	0.0329367	0.03193	0.0310367	0.0308133	0.0233733
	701	0.0221033	0.0246933	0.02848	0.0305467	0.0354133	0.0325	0.03168	0.0308033	0.0305	0.02341
	701.5	0.02152	0.02384	0.0276867	0.0299567	0.0346867	0.0320767	0.03139	0.0304767	0.0303033	0.0231233
	702	0.02088	0.02303	0.02688	0.0293333	0.03399	0.0316867	0.03111	0.03018	0.03004	0.0226867
	702.5	0.0203367	0.0224267	0.0261367	0.02878	0.03327	0.0313433	0.0307233	0.0298433	0.02983	0.0223633
	703	0.0199033	0.0220333	0.02559	0.02836	0.0327067	0.0310233	0.0304733	0.0296733	0.0295667	0.02223
	703.5	0.0193933	0.0217033	0.0251533	0.0279733	0.0321167	0.0305967	0.0302433	0.0294367	0.0292233	0.02232
	704	0.0188867	0.0212767	0.0247133	0.0274967	0.0315867	0.0300767	0.0300233	0.02923	0.0288133	0.0223267
	704.5	0.01843	0.02095	0.0243667	0.02694	0.03099	0.0295733	0.0297233	0.0290033	0.0285433	0.0222667
	705	0.0181067	0.0206033	0.0240767	0.02641	0.03053	0.02929	0.02937	0.0287933	0.0283433	0.0221367
	705.5	0.0177933	0.02025	0.02371	0.0259567	0.03012	0.0290367	0.0288167	0.0283633	0.0281833	0.02214
	706	0.01741	0.01994	0.0233033	0.0255833	0.0296967	0.0288733	0.0282567	0.02791	0.02785	0.0221433
	706.5	0.0171033	0.01966	0.0228933	0.0251567	0.0290733	0.0286467	0.02785	0.0275267	0.0275833	0.02208
	707	0.0167867	0.0194167	0.0226533	0.0247167	0.02854	0.0283367	0.0277567	0.0273233	0.0274333	0.02188
	707.5	0.0164467	0.0190133	0.0223433	0.02432	0.0281433	0.0279	0.0276067	0.0270633	0.0274967	0.02176
	708	0.0160667	0.0187433	0.02207	0.02416	0.02808	0.0275967	0.02737	0.0268367	0.0274733	0.0217667
	708.5	0.0158533	0.0185333	0.02167	0.0241233	0.028	0.02754	0.0271367	0.0267267	0.0273	0.0218567
	709	0.0157133	0.01852	0.0214567	0.02409	0.02794	0.0274867	0.0270433	0.0267867	0.0270133	0.0219167
	709.5	0.0155633	0.0184833	0.0213233	0.0239267	0.0276833	0.0272033	0.0269433	0.0267767	0.0268767	0.0219267
	710	0.0153333	0.0183033	0.02123	0.02364	0.0273367	0.0267967	0.0267967	0.0266733	0.0267633	0.02187
	710.5	0.0151367	0.01802	0.0210333	0.0232433	0.02689	0.0264967	0.02673	0.0266	0.0267467	0.0217767
	711	0.0148933	0.0177367	0.0207433	0.0229267	0.0265533	0.02642	0.02665	0.0265333	0.02658	0.02172
	711.5	0.01473	0.01747	0.0203933	0.0226367	0.0263033	0.02642	0.0265633	0.02644	0.02633	0.0217233
	712	0.0146233	0.0172667	0.0201633	0.0224267	0.0261633	0.02639	0.0263733	0.02627	0.02614	0.02174
	712.5	0.01463	0.0171567	0.0200467	0.0223167	0.0261033	0.0263433	0.02626	0.0262533	0.0261567	0.0217133
	713	0.0144167	0.01708	0.01998	0.0222967	0.0260067	0.0262333	0.02613	0.02617	0.02642	0.0217633
	713.5	0.0141867	0.0169133	0.0198	0.0222133	0.02572	0.0262467	0.0260667	0.0260433	0.02661	0.02182
	714	0.0140167	0.0167367	0.0195567	0.02208	0.02535	0.0262567	0.0260267	0.0258467	0.02667	0.02191
	714.5	0.0140067	0.01667	0.0193867	0.0221	0.02523	0.0262233	0.02598	0.0257867	0.02653	0.0218967
	715	0.0140067	0.0166967	0.0193667	0.02223	0.02525	0.02611	0.0259667	0.0258367	0.0264367	0.02188
	715.5	0.0140267	0.01662	0.0193467	0.02218	0.0253	0.0260667	0.02606	0.02599	0.0264667	0.0220567
	716	0.01409	0.0166967	0.01948	0.0220933	0.0252133	0.0260367	0.02618	0.0261367	0.0265733	0.0223867
	716.5	0.0141067	0.0168133	0.0195833	0.02207	0.0251867	0.0259667	0.02622	0.02617	0.0266033	0.0226833
	717	0.0139667	0.0169133	0.01966	0.0219967	0.0250767	0.0258833	0.0262167	0.02616	0.0265833	0.02268
	717.5	0.01384	0.01667	0.01953	0.02182	0.0250267	0.02599	0.02623	0.0260833	0.0265233	0.02248
	718	0.01383	0.0165633	0.0195733	0.0216833	0.0250867	0.0261333	0.02628	0.02604	0.0265667	0.0223067
	718.5	0.01385	0.0164267	0.0196267	0.0216433	0.0251567	0.0261467	0.0262367	0.02601	0.0265733	0.0221567
	719	0.0139167	0.01649	0.0195267	0.02162	0.0251267	0.02618	0.0261667	0.0261233	0.0266833	0.0221867
	719.5	0.01392	0.0164467	0.0193267	0.02158	0.02497	0.0262667	0.0261867	0.02626	0.0266833	0.0222433
	720	0.01379	0.0164667	0.0192333	0.0216333	0.0249067	0.0263367	0.0261833	0.0262433	0.0267567	0.0222633
	720.5	0.0136067	0.01644	0.01935	0.02167	0.0249	0.02626	0.0261467	0.02615	0.0267633	0.0223033
	721	0.0136	0.0164733	0.0195	0.0217467	0.025	0.02615	0.0261267	0.02617	0.0268033	0.0223567
	721.5	0.0136733	0.0165133	0.0195067	0.0216233	0.0249167	0.0262233	0.02614	0.02618	0.0267	0.0224767
	722	0.0136867	0.01633	0.01922	0.0214033	0.02474	0.02622	0.0261333	0.0261567	0.0266833	0.0225433
	722.5	0.0136633	0.0161133	0.0189567	0.0212633	0.0245533	0.0260933	0.0261433	0.02605	0.02676	0.0225667
	723	0.0136367	0.01591	0.0188633	0.0212233	0.02452	0.0258967	0.0261733	0.0259533	0.0268933	0.02263
	723.5	0.0136233	0.01609	0.0190867	0.0214933	0.0246867	0.0259033	0.02628	0.02604	0.0269367	0.0225567
	724	0.0135433	0.0163267	0.0192	0.0217	0.0247867	0.0259567	0.0263233	0.0262133	0.0268267	0.0226433
	724.5	0.0134867	0.01646	0.0191633	0.02185	0.02484	0.02597	0.0263733	0.02639	0.0266767	0.0227733
	725	0.0134	0.0165533	0.01922	0.02181	0.0247833	0.02598	0.02642	0.0264467	0.0265467	0.0230033
	725.5	0.01328	0.0166367	0.01936	0.02176	0.02479	0.0259467	0.0264233	0.02642	0.0266667	0.0231033
	726	0.0131267	0.0167133	0.0194233	0.0217167	0.02477	0.0258167	0.02641	0.0264367	0.02686	0.0230133
	726.5	0.0131	0.0165533	0.0191933	0.02175	0.02483	0.02583	0.0263433	0.0263867	0.02702	0.02307
	727	0.0132667	0.01637	0.01896	0.0218033	0.0248933	0.02605	0.02641	0.02639	0.0270533	0.02311
	727.5	0.0135267	0.01632	0.01888	0.02215	0.02521	0.0263933	0.02653	0.0264867	0.0271733	0.0232633
	728	0.0136533	0.0162767	0.0188967	0.0222733	0.0253567	0.02661	0.0266833	0.0266933	0.02727	0.0231167
	728.5	0.0136167	0.0163433	0.019	0.02227	0.0253433	0.0268267	0.02675	0.0267833	0.0273933	0.0230667
	729	0.01352	0.0165267	0.01928	0.0221267	0.02522	0.0268867	0.0266767	0.02675	0.0274633	0.0230567
	729.5	0.0133333	0.01668	0.01951	0.0221033	0.0251767	0.0267367	0.0267033	0.02679	0.0274333	0.0231133
	730	0.0132733	0.0165267	0.0193667	0.02201	0.0250267	0.0267167	0.0266867	0.0268567	0.0274433	0.0231133
	730.5	0.0133767	0.0165133	0.0191967	0.0220533	0.0250333	0.02683	0.0267867	0.02699	0.0276667	0.02319
	731	0.0136133	0.0167033	0.01922	0.0221167	0.0250867	0.0269733	0.0268433	0.0269367	0.0278833	0.0235233
	731.5	0.0138067	0.0169033	0.01936	0.02244	0.02539	0.02688	0.02697	0.0269267	0.02784	0.02393
	732	0.01376	0.01683	0.0193933	0.0226033	0.02548	0.02675	0.0270567	0.0268667	0.02775	0.0240933
	732.5	0.01351	0.0167633	0.0195333	0.0225967	0.0254167	0.0266467	0.0271633	0.0269433	0.0278267	0.0240333
	733	0.0132433	0.0167433	0.0196633	0.02244	0.0252667	0.0267467	0.0272567	0.02698	0.0280067	0.02393
	733.5	0.01315	0.01676	0.0197467	0.02243	0.02535	0.0269633	0.0273	0.02708	0.02812	0.0239533
	734	0.0133233	0.01689	0.0198067	0.0225133	0.0255633	0.02708	0.0273833	0.0272333	0.0280933	0.02406
	734.5	0.0135533	0.0170767	0.0199067	0.02247	0.0256033	0.0272033	0.02747	0.0274533	0.02807	0.02406
	735	0.0138433	0.0170433	0.0198933	0.02227	0.0255167	0.02719	0.0274867	0.02748	0.0282367	0.0239867
	735.5	0.0137967	0.01691	0.01977	0.0220633	0.02538	0.0271333	0.02745	0.0274167	0.02836	0.02382
	736	0.01373	0.0167633	0.0195833	0.0219167	0.0251667	0.0270367	0.02733	0.0273233	0.02831	0.0237433
	736.5	0.0136067	0.0167633	0.0195433	0.0220267	0.02513	0.02703	0.0270933	0.0272267	0.02823	0.02368
	737	0.0137467	0.01677	0.01955	0.0221967	0.0251867	0.0269767	0.0268533	0.0270333	0.0281233	0.02359
	737.5	0.01376	0.0168233	0.0196367	0.02244	0.02543	0.0268667	0.0269467	0.0269233	0.02819	0.0235233
	738	0.0136467	0.01681	0.01952	0.02252	0.0254367	0.0268	0.0270333	0.0268233	0.02806	0.0236033
	738.5	0.0133733	0.01666	0.0192567	0.0224067	0.0253133	0.0267233	0.0269733	0.0267433	0.0277733	0.02373
	739	0.0132533	0.01637	0.01891	0.0222	0.02506	0.0265867	0.0268467	0.0266867	0.0274	0.0238167
	739.5	0.0131667	0.01619	0.0188567	0.02207	0.02483	0.0263567	0.0267367	0.0265933	0.0271233	0.02352
	740	0.0130933	0.01615	0.0189733	0.0221067	0.02474	0.0262533	0.02655	0.02653	0.02708	0.02327
	740.5	0.0128433	0.0162267	0.0191233	0.02195	0.02465	0.02621	0.0262533	0.0263933	0.02714	0.0229867
	741	0.0127067	0.0161733	0.0190867	0.0217633	0.0246	0.02624	0.02602	0.02624	0.0271967	0.0228967
	741.5	0.0126367	0.0161633	0.01905	0.0214833	0.02444	0.0261767	0.0259533	0.0261833	0.02711	0.0230233
	742	0.01254	0.0159967	0.0188533	0.02126	0.0241567	0.02606	0.0259	0.02612	0.02686	0.0229033
	742.5	0.01241	0.01548	0.01829	0.0207633	0.0236067	0.0259833	0.0258333	0.0259633	0.02675	0.02257
	743	0.0123	0.0151233	0.0178867	0.0204033	0.02314	0.0258733	0.0257567	0.0256133	0.02637	0.02203
	743.5	0.01227	0.0149767	0.01777	0.02023	0.0227833	0.0256733	0.0257333	0.02537	0.0260467	0.0218767
	744	0.0122667	0.01525	0.0180133	0.02034	0.02262	0.02519	0.0256433	0.0251733	0.0257533	0.02191
	744.5	0.0122167	0.01502	0.0177533	0.0202367	0.0223167	0.02472	0.02533	0.02492	0.0255867	0.02173
	745	0.0119393	0.01441	0.01713	0.0199233	0.0220233	0.0243633	0.0248633	0.02464	0.0252667	0.0211967
	745.5	0.0115997	0.0139933	0.01669	0.01962	0.0217467	0.0241333	0.0244	0.0242433	0.0248633	0.0207467
	746	0.011424	0.0142	0.01673	0.01949	0.0216533	0.0236967	0.0239533	0.02377	0.0245533	0.0207033
	746.5	0.0114037	0.0144033	0.0167767	0.01934	0.02144	0.02332	0.0236333	0.02333	0.0241633	0.02058
	747	0.0111997	0.0144233	0.01673	0.0189933	0.0209967	0.02307	0.0233033	0.0228767	0.0237933	0.0201433
	747.5	0.0107567	0.0141667	0.0165067	0.0187067	0.0204667	0.02277	0.0228267	0.0223667	0.0233867	0.0196333
	748	0.0105287	0.01374	0.0161433	0.0184067	0.0199267	0.0221633	0.0223867	0.0219467	0.02306	0.0193233
	748.5	0.0105177	0.0132033	0.0156	0.0180367	0.0193633	0.02179	0.02201	0.02158	0.0227	0.0191833
	749	0.0103533	0.0129467	0.01518	0.0176167	0.0188967	0.02154	0.0216867	0.02133	0.0223733	0.01903
	749.5	0.00993467	0.01273	0.0148267	0.0173	0.0185467	0.0211933	0.0213167	0.0210333	0.0220167	0.0187733
	750	0.009482	0.0124567	0.0145833	0.0169367	0.0181767	0.0204767	0.0210633	0.0208267	0.0217667	0.01827
	750.5	0.009201	0.0120767	0.0144333	0.0164967	0.0177333	0.0198433	0.0208167	0.0203967	0.0213533	0.0179267
	751	0.00904033	0.01183	0.0142133	0.01611	0.0172667	0.0195367	0.0204833	0.0199933	0.0208733	0.0175667
	751.5	0.008977	0.0115467	0.01384	0.0157233	0.01676	0.0193333	0.0201633	0.01966	0.0202967	0.01709
	752	0.008817	0.0112933	0.0134067	0.0153433	0.0162467	0.0191467	0.0198767	0.0194367	0.0199633	0.0165267
	752.5	0.00846133	0.0112733	0.0132833	0.01507	0.01598	0.0188167	0.0194333	0.0190067	0.0197033	0.0161733
	753	0.00801767	0.0113467	0.0133233	0.0149333	0.01579	0.0184533	0.0190167	0.0185233	0.01934	0.01594
	753.5	0.007851	0.0115367	0.0134867	0.01485	0.0155633	0.01815	0.01866	0.0181033	0.01876	0.01577
	754	0.007831	0.0114767	0.01328	0.01442	0.0149333	0.0178933	0.01827	0.0177067	0.01824	0.0155133
	754.5	0.00781867	0.0111833	0.0127867	0.0139533	0.0143367	0.0175433	0.0176033	0.0171633	0.0178333	0.0151833
	755	0.00770867	0.0105233	0.01207	0.0134667	0.0137333	0.0168933	0.0170267	0.0166867	0.0176533	0.01472
	755.5	0.00738167	0.00990533	0.0116233	0.0132867	0.0135233	0.01634	0.01658	0.0162033	0.01751	0.01437
	756	0.007031	0.00956367	0.0113667	0.0132267	0.0133	0.0159133	0.0161633	0.0157233	0.01723	0.0142667
	756.5	0.00677833	0.00948367	0.01121	0.0132133	0.0131033	0.0157733	0.0156333	0.0151833	0.0168433	0.01421
	757	0.006533	0.009375	0.0109067	0.0127733	0.0125133	0.01556	0.0152967	0.0148533	0.0165	0.0140033
	757.5	0.00632167	0.009281	0.01072	0.0122967	0.0121	0.01525	0.0152033	0.0146733	0.01613	0.0137067
	758	0.006138	0.00931	0.0107267	0.0119933	0.01183	0.01468	0.01499	0.0144333	0.01557	0.0134767
	758.5	0.005974	0.00936933	0.0108033	0.0118067	0.0116667	0.01428	0.0145167	0.01397	0.0151133	0.0132567
	759	0.00577633	0.00919367	0.0104727	0.0116067	0.0114033	0.0138867	0.01405	0.01358	0.0147967	0.0128867
	759.5	0.00566433	0.00870933	0.0100207	0.01129	0.0110167	0.0135667	0.0138633	0.0134	0.0145967	0.0122367
	760	0.00558967	0.007891	0.009338	0.0108627	0.0104767	0.01307	0.0137533	0.0132067	0.0142367	0.0115367
	760.5	0.00538167	0.00756033	0.00907533	0.0105497	0.00999033	0.01264	0.0134667	0.01279	0.0137767	0.0110933
	761	0.005106	0.00753433	0.008966	0.010487	0.00964933	0.0124767	0.0130933	0.0122567	0.0132833	0.0109067
	761.5	0.00481367	0.00772533	0.009015	0.0104647	0.00935967	0.01248	0.0126533	0.01184	0.01307	0.0107133
	762	0.00443933	0.00754967	0.008806	0.0100343	0.00891233	0.0124633	0.01236	0.0114733	0.0129533	0.0105443
	762.5	0.004102	0.007441	0.00861	0.009459	0.008371	0.0120967	0.0120967	0.0112333	0.01279	0.010308
	763	0.00389767	0.00720467	0.00831333	0.00904633	0.007973	0.0117567	0.0117833	0.01087	0.0123867	0.0101513
	763.5	0.003914	0.006804	0.00779533	0.00887367	0.007757	0.0114333	0.01135	0.01058	0.01198	0.009828
	764	0.004039	0.006364	0.00728267	0.008558	0.00745567	0.0111233	0.0108333	0.0101737	0.01168	0.009462
	764.5	0.003933	0.00600033	0.00695	0.00826067	0.00698	0.01087	0.0104897	0.009789	0.0115533	0.00898867
	765	0.003802	0.00611	0.00708133	0.008178	0.00652667	0.0105767	0.0102737	0.009389	0.0112067	0.00889367
	765.5	0.00356833	0.00627667	0.00724933	0.00812133	0.006212	0.0102383	0.0100477	0.00893533	0.0107233	0.00888867
	766	0.00311367	0.006002	0.006862	0.007762	0.00588867	0.00984833	0.00970333	0.00849967	0.0103567	0.008727
	766.5	0.002713	0.00557167	0.00656467	0.00757067	0.00567967	0.009763	0.00952533	0.00825233	0.0101333	0.00834167
	767	0.0025	0.00530833	0.00628467	0.00743833	0.00547667	0.00929833	0.00943233	0.00823333	0.00961267	0.00790833
	767.5	0.00232567	0.005462	0.00636033	0.007313	0.00516867	0.00867367	0.009342	0.008145	0.00912467	0.00751267
	768	0.00211067	0.00545167	0.00611333	0.00702133	0.00477767	0.008035	0.009164	0.00800267	0.00878767	0.00731533
	768.5	0.00190247	0.00520167	0.005871	0.00680467	0.00441633	0.00762567	0.008909	0.007715	0.00872067	0.00731533
	769	0.00209033	0.00481	0.00549467	0.006642	0.00419033	0.00736667	0.008406	0.007235	0.008499	0.007157
	769.5	0.00216967	0.00451267	0.005287	0.00627933	0.003861	0.00735067	0.00809433	0.00687033	0.00830633	0.00693433
	770	0.00203767	0.004392	0.005043	0.005992	0.00358167	0.00717667	0.007999	0.00667967	0.00808233	0.00644367
	770.5	0.00151493	0.004177	0.00473533	0.00589133	0.00337133	0.00678933	0.00791733	0.006542	0.00793367	0.00621933
	771	0.0011406	0.003775	0.00438133	0.005909	0.00327233	0.006336	0.00764367	0.00631033	0.007717	0.00609067
	771.5	0.00106097	0.00370067	0.00441767	0.005815	0.00318	0.00643667	0.00732767	0.006008	0.007559	0.00592333
	772	0.00120797	0.00365767	0.00417	0.00545033	0.002953	0.006639	0.00703867	0.00567633	0.00726333	0.005534
	772.5	0.00133587	0.00339	0.00373267	0.00510233	0.00251533	0.00678233	0.006623	0.00533367	0.00685633	0.005198
	773	0.00107207	0.00296433	0.00337033	0.005054	0.002211	0.006647	0.00641033	0.005112	0.00642333	0.00500533
	773.5	0.0004572	0.00301733	0.00361067	0.00520567	0.00229433	0.00636367	0.00644133	0.00527433	0.00611833	0.005094
	774	0.00010901	0.00326467	0.00379	0.005075	0.00218	0.00589567	0.00627367	0.00518433	0.00612	0.00516667
	774.5	0.000365533	0.00341367	0.00380133	0.00484567	0.00188867	0.00544933	0.00596767	0.004833	0.005965	0.00525967
	775	0.0008191	0.00337067	0.003611	0.004636	0.001496	0.00517	0.00573767	0.004309	0.00569867	0.00526133
	775.5	0.000866567	0.00329	0.00346733	0.00445967	0.00124567	0.00512533	0.00558933	0.004063	0.00554567	0.005198
	776	0.000787967	0.00325133	0.003454	0.00436867	0.001174	0.00526	0.005369	0.004053	0.00576433	0.00492467
	776.5	0.000676667	0.00283667	0.00338967	0.00436667	0.00117033	0.00520933	0.005416	0.00421967	0.00598	0.00446133
	777	0.000364553	0.00243567	0.00315833	0.00442633	0.001191	0.00494667	0.00555567	0.00433767	0.00608467	0.00397767
	777.5	3.32733e-05	0.00218933	0.00286633	0.00441933	0.0009881	0.004673	0.005419	0.00415	0.00571133	0.00378433
	778	0	0.00235233	0.00283	0.004208	0.000676067	0.00465967	0.005218	0.00394833	0.00498633	0.00396033
	778.5	0	0.00226233	0.002737	0.00386667	0.000329833	0.004596	0.00509433	0.003895	0.004323	0.00378967
	779	0	0.00232833	0.00268333	0.003475	4.03667e-05	0.004309	0.004766	0.003652	0.003782	0.003582
	779.5	6.48567e-05	0.00241333	0.00262433	0.00320367	0	0.003859	0.004266	0.003242	0.00363033	0.003114
	780	1.48833e-05	0.00263733	0.002799	0.002944	0	0.00369333	0.00402533	0.002859	0.003811	0.00283333
	780.5	0	0.00250133	0.00280267	0.00279267	0	0.003724	0.00403833	0.00254133	0.00413367	0.00263233
	781	0	0.00232367	0.00268167	0.002889	0	0.00398233	0.00397667	0.00208567	0.00424133	0.00292133
	781.5	0	0.00203433	0.00237767	0.00291267	0	0.00406233	0.00386167	0.001885	0.00433167	0.003076
	782	0	0.00185733	0.00224433	0.00284267	0	0.00393633	0.00394267	0.00195467	0.00437033	0.00300233
	782.5	0	0.001724	0.00226467	0.00261	0	0.003739	0.004042	0.00217433	0.00435667	0.00288567
	783	0	0.00159467	0.00227	0.00254033	0	0.003422	0.00404167	0.00220233	0.004281	0.00290133
	783.5	0	0.001627	0.00216567	0.00261967	0	0.00319833	0.00391233	0.00217367	0.00409867	0.00278433
	784	0	0.00151133	0.001939	0.00251267	0	0.00293833	0.003807	0.00209	0.003798	0.002604
	784.5	0	0.00133337	0.00168567	0.00225467	0	0.002788	0.00385267	0.00202533	0.003517	0.00251867
	785	0	0.00120323	0.00150033	0.002137	0	0.00271067	0.00407633	0.002008	0.00345967	0.00266267
	785.5	0	0.00144667	0.00160967	0.002391	0	0.00285033	0.00429633	0.00205633	0.00366433	0.00298833
	786	0	0.001835	0.001693	0.00252867	0	0.003048	0.00405267	0.002065	0.00376767	0.00312533
	786.5	0	0.001969	0.001612	0.00251167	0	0.003198	0.00369967	0.002026	0.00376133	0.00273267
	787	0	0.00188233	0.00154467	0.00241433	0	0.00318567	0.00343	0.00200067	0.00352633	0.00229867
	787.5	0	0.001591	0.00143033	0.00237733	0	0.00299033	0.003562	0.002074	0.00334933	0.00236967
	788	6.51333e-06	0.00122033	0.00114107	0.00237067	0	0.00272967	0.003414	0.00198467	0.00317067	0.002645
	788.5	0	0.0011015	0.00105777	0.00210333	0	0.00256867	0.00319333	0.001942	0.003068	0.00255133
	789	0	0.00101443	0.00101297	0.00185267	0	0.00255	0.003175	0.00189833	0.003128	0.00204367
	789.5	0	0.00100507	0.001165	0.00172267	0	0.00252833	0.003288	0.001495	0.003051	0.001804
	790	0	0.001217	0.00145367	0.001983	0	0.00242633	0.00309667	0.00102513	0.002962	0.002086
	790.5	0	0.001709	0.001881	0.00213533	0	0.00240867	0.002785	0.000786833	0.00266333
	791	0	0.001839	0.00186533	0.00237367	0	0.00242867	0.00312933	0.00115963	0.00286767
	791.5	0	0.00163467	0.00156433	0.00226467	0	0.00236833	0.00360033	0.001643	0.003133
	792	0	0.00122567	0.001201	0.002199	0	0.00231067	0.00376533	0.001842	0.00319167
	792.5	0	0.00122987	0.001164	0.001851	0	0.00219567	0.00368333	0.00166867	0.00304467
	793	0	0.001349	0.001228	0.00164667	0	0.00206933	0.00361433	0.001445	0.00300767
	793.5	0	0.00107953	0.0010867	0.00159667	0	0.00195033	0.00347533	0.00140467	0.00291867
	794	0	0.000548467	0.0008156	0.001804	0	0.00196033	0.00324667	0.00135567	0.00248233
	794.5	0	0.000376167	0.0006107	0.00178567	0	0.00205967	0.00315167	0.001327	0.00221633
	795	0	0.000733033	0.000800933	0.00171367	0	0.00213133	0.00291867	0.001122	0.00228533
	795.5	0	0.000734967	0.0007596	0.00176867	0	0.00215133	0.002477	0.000799533	0.00240467
	796	0	0.000787467	0.000773767	0.00151467	0	0.00198533	0.00228267	0.0005917	0.00247167
	796.5	0	0.000996833	0.000861833	0.00122917	0	0.00176933	0.00255833	0.0006613	0.00267533
	797	0	0.00129683	0.00122133	0.0010821	0	0.00152567	0.00273533	0.0003531	0.002624
	797.5	0	0.00147133	0.0014354	0.00118177	0	0.00138807	0.00261867	9.05667e-05	0.002485
	798	0	0.00156033	0.0015263	0.00119557	0	0.0013033	0.002558	5.92e-05	0.00253133
	798.5	0	0.00163467	0.00137953	0.00118247	0	0.00124167	0.002587	0.000221233	0.00287233
	799	0	0.00138533	0.00109843	0.00131417	0	0.00125587	0.00255667	0.000364367	0.00304933
	799.5	0	0.00107513	0.0009663	0.001664	0	0.001492	0.00247233	0.000348633	0.00303733
	800	0	0.000821	0.000936733	0.00190167	0	0.00153867	0.002483	0.000296573	0.002933
	800.5	0	0.000561067	0.000701267	0.0017551	0	0.00162483	0.00268533	0.000489833	0.002478
	801	0	0.000538567	0.0004221	0.00131327	0	0.001764	0.002704	0.0006183	0.00219733
	801.5	0	0.000813133	0.000268233	0.000764167	0	0.002154	0.00256033	0.000591867	0.002228
	802	0	0.000844267	7.37603e-05	0.0010274	0	0.002014	0.00237633	0.000685467	0.00256733
	802.5	0	0.000589367	8.67333e-05	0.00139033	0	0.001758	0.00250567	0.0009194	0.002655
	803	0	0.0004871	0.000219783	0.0013109	0	0.001442	0.00275033	0.00117367	0.00285533
	803.5	0	0.0007246	0.0007452	0.000939333	0	0.00141443	0.00276367	0.000827767	0.00286933
	804	0	0.0009068	0.0009745	0.00111193	0	0.00133537	0.00238633	0.000194087	0.00261633
	804.5	0	0.000975667	0.0011002	0.00139167	0	0.0014635	0.00212267	0	0.00214067
	805	0	0.000978667	0.00100993	0.00141953	0	0.00150167	0.00205	0	0.00162867
	805.5	0	0.0006732	0.000667167	0.00131467	0	0.001696	0.00190833	0	0.00152533
	806	0	0.000185883	0.000106063	0.00115303	0	0.001612	0.00155733	0	0.00176667
	806.5	0	0.0001259	0.000102233	0.000850633	0	0.00159267	0.00162033	1.71967e-05	0.00208267
	807	0	0.000165307	0.000307867	0.00080365	0	0.00144233	0.00169	0.000157267	0.00211167
	807.5	0	0.0004698	0.000639733	0.000799233	0	0.001372	0.001805	0.000271645	0.002458
	808	0	0.000385533	0.000410733	0.000800567	0	0.00128433	0.00217667	0.000328433	0.00266567
	808.5	0	0.000282433	0.0001889	0.000689233	0	0.00112437	0.00275967	0.0007283	0.002434
	809	0	0.000369733	0.000246867	0.000417967	0	0.00102783	0.002952	0.00100343	0.00206067
	809.5	0	0.0003698	0.00032231	0.000288307	0	0.000919967	0.00276433	0.0006653	0.00174933
	810	0	0.000147743	0.000140632	0.000530023	0	0.00111803	0.00230933	1.46313e-05	0.00149333

## Sheet: Exp. B b2
Experiment B		Average of Bottle 2 measurements [W]; time in hours
		0	12	24	36	48	72	84	96	108	168
bottle 2	Wavelength [nm]	Am	Pm	Am	Pm	Am	Am	PM	Am	PM	Am
	390	0.000719467	0.0008327	0.000537567	2.10833e-06	0	0	0	0	3.028e-05	0
	390.5	0.000727467	0.000916567	0.000581567	1.53133e-05	0	0	0	0	3.57433e-05	0
	391	0.000754567	0.000959267	0.000587467	4.53667e-05	0	0	0	0	3.02047e-05	0
	391.5	0.000799733	0.000971867	0.000573667	9.21077e-05	0	0	0	0	3.22503e-05	0
	392	0.000850467	0.000902733	0.000494033	0.000109333	0	0	0	0	1.98453e-05	0
	392.5	0.000890533	0.0008801	0.000483367	9.11883e-05	0	0	0	0	2.66033e-05	0
	393	0.000898033	0.000928133	0.000526233	7.94405e-05	0	0	0	0	2.55867e-05	0
	393.5	0.000890433	0.00103937	0.000622867	8.15167e-05	0	0	0	0	2.45533e-05	0
	394	0.000890167	0.001122	0.0006929	0.000110847	0	0	0	0	2.85633e-05	0
	394.5	0.000910733	0.00117633	0.000720433	0.00013778	0	0	1.84067e-06	0	2.29967e-05	6.32667e-07
	395	0.000987467	0.00119833	0.000744933	0.000134207	0	0	1.76933e-05	0	2.02567e-05	1.28933e-05
	395.5	0.001066	0.00120767	0.0007735	0.000133177	0	0	1.65713e-05	0	7.46333e-06	2.49067e-05
	396	0.001129	0.001218	0.0007925	0.00010867	0	0	2.52e-05	0	9.78667e-06	2.51733e-05
	396.5	0.00116833	0.001157	0.000762567	0.0001036	0	0	4.36367e-05	0	7.38e-06	6.52333e-06
	397	0.001145	0.00109367	0.0007241	0.00011691	0	0	6.724e-05	0	1.0021e-05	0
	397.5	0.00109217	0.00108667	0.000727433	0.00015034	0	0	0.000107033	0	2.65427e-05	0
	398	0.00105527	0.001122	0.000755467	0.000182867	0	0	0.000107777	0	7.21867e-06	0
	398.5	0.00104347	0.00117767	0.000798567	0.000183933	0	0	7.621e-05	0	0	0
	399	0.00109743	0.001218	0.0008063	0.000181897	0	0	4.96533e-05	0	2.34367e-06	0
	399.5	0.001195	0.00120767	0.000776567	0.000191233	0	0	2.00895e-05	0	1.096e-05	0
	400	0.00123767	0.00117333	0.000753767	0.0002158	0	0	9.19333e-06	0	2.38893e-05	0
	400.5	0.001262	0.00114233	0.000712867	0.0002094	0	0	9.80167e-06	0	3.70867e-05	0
	401	0.001244	0.00110567	0.0006728	0.000198633	0	0	1.018e-05	0	3.05933e-05	0
	401.5	0.00118633	0.00110433	0.000667367	0.000188703	0	0	2.63567e-05	0	1.131e-05	0
	402	0.001161	0.00114667	0.000704933	0.000181277	0	0	4.023e-05	0	3.54667e-06	0
	402.5	0.00113833	0.00121467	0.000779667	0.000184137	0	0	2.63367e-05	0	6.49e-06	0
	403	0.001165	0.00127233	0.000837833	0.000173907	0	0	1.0659e-05	0	1.28e-05	0
	403.5	0.001186	0.00128567	0.000846833	0.000171467	0	0	2.97733e-07	0	2.31343e-05	0
	404	0.00118833	0.001276	0.000828967	0.00017645	0	0	0	0	3.128e-05	0
	404.5	0.001228	0.001257	0.000796467	0.000175333	0	0	0	0	3.557e-05	0
	405	0.001265	0.00125333	0.000786433	0.000171013	0	0	0	0	5.208e-05	0
	405.5	0.001339	0.00124733	0.0007825	0.00016697	0	0	0	0	6.26933e-05	0
	406	0.00142233	0.00120933	0.000759167	0.000171	0	0	2.19533e-06	0	7.58167e-05	0
	406.5	0.001411	0.00120267	0.0007734	0.00016846	0	0	1.55267e-05	0	6.23567e-05	0
	407	0.00134633	0.001226	0.000805867	0.000175133	0	0	4.04873e-05	0	2.14367e-05	0
	407.5	0.00127167	0.00127833	0.000856467	0.000184203	0	0	7.65133e-05	0	0	0
	408	0.00122133	0.00130667	0.000878233	0.00018197	0	0	0.000120433	0	3.32133e-06	0
	408.5	0.00121733	0.00132067	0.000883667	0.00015868	0	0	0.000153167	0	2.577e-05	0
	409	0.00124733	0.00135967	0.000893633	0.000142567	0	0	0.000155637	0	5.00233e-05	0
	409.5	0.00125167	0.00139367	0.000900067	0.00013945	0	0	0.000132133	0	6.17933e-05	0
	410	0.00123533	0.001427	0.000928667	0.000169183	0	0	0.00011077	0	7.542e-05	0
	410.5	0.00124867	0.00140667	0.000914433	0.000209433	0	0	8.59133e-05	0	0.000102447	0
	411	0.00130467	0.00135033	0.000873233	0.000229567	0	0	6.62767e-05	0	0.000150027	0
	411.5	0.00140567	0.001314	0.000845367	0.0002566	0	0	4.94e-05	0	0.000171567	0
	412	0.001519	0.00123533	0.0007563	0.0002542	0	0	5.70033e-05	0	0.000126677	0
	412.5	0.00160633	0.001209	0.0007259	0.000265433	0	0	6.381e-05	0	5.76367e-05	0
	413	0.00163933	0.00123233	0.000751033	0.000278933	0	0	5.68567e-05	0	2.12423e-05	0
	413.5	0.00165	0.00129333	0.0008138	0.000284767	0	8.57e-06	4.17267e-05	0	1.516e-05	0
	414	0.00167	0.00139867	0.000919167	0.0002839	0	3.47567e-05	1.6431e-05	0	4.6279e-05	0
	414.5	0.00171467	0.00146467	0.000967967	0.000260067	0	2.89553e-05	2.03933e-05	0	8.839e-05	0
	415	0.00174933	0.001524	0.00100537	0.000288333	0	2.08267e-05	4.65133e-05	0	9.97133e-05	0
	415.5	0.00179567	0.00158667	0.00103783	0.000332667	0	7.02333e-06	8.27067e-05	0	0.000112557	0
	416	0.00181367	0.00164067	0.00107677	0.0003547	0	7.02e-06	0.00011906	0	0.000105427	0
	416.5	0.00185233	0.001699	0.0011308	0.000348433	0	1.13767e-05	0.000116807	0	9.953e-05	0
	417	0.001952	0.00172967	0.0011626	0.000293867	0	2.55867e-05	9.59167e-05	0	7.59367e-05	0
	417.5	0.00206467	0.001799	0.00124377	0.000272033	0	3.62233e-05	0.00010022	0	4.76063e-05	0
	418	0.00216267	0.001863	0.00132833	0.0003236	0	1.88033e-05	0.000106213	0	4.551e-05	0
	418.5	0.00222467	0.00193833	0.00140367	0.000406433	0	7.64667e-06	0.000118967	0	4.891e-05	0
	419	0.00229233	0.00203367	0.00148733	0.0004898	0	5.74333e-09	0.00010495	0	8.35933e-05	0
	419.5	0.00241733	0.00207433	0.00147633	0.000477133	0	0	0.00010454	0	0.000113267	0
	420	0.00259567	0.00212067	0.00146567	0.0004253	0	6.5e-06	0.000126287	0	0.000143467	0
	420.5	0.00274667	0.00211933	0.001459	0.000384167	0	1.71067e-05	0.000170967	0	0.000182967	0
	421	0.00286767	0.00216833	0.00149967	0.000407767	0	1.743e-05	0.0002055	0	0.000183533	3.38667e-06
	421.5	0.00300033	0.002289	0.00161367	0.000523067	0	1.16933e-05	0.000241867	0	0.000170343	7.64333e-06
	422	0.00309867	0.00249333	0.00178267	0.0006646	0	2.13367e-05	0.000270233	0	0.000153373	1.628e-05
	422.5	0.00322767	0.002703	0.00193767	0.000776767	0	4.5159e-05	0.000273833	0	0.00014594	9.99333e-06
	423	0.00339167	0.002838	0.00202667	0.0008593	0	0.000104191	0.000276033	0	0.000156553	0
	423.5	0.00359633	0.00293567	0.00208533	0.000875533	0	0.000143433	0.000251333	0	0.000190237	0
	424	0.00386967	0.00301833	0.002137	0.0008626	0	0.000149773	0.000257867	0	0.000244833	0
	424.5	0.004148	0.00316133	0.002265	0.000876733	0	0.000182633	0.000308367	0	0.000321533	0
	425	0.00440633	0.00336567	0.00244033	0.000923867	0	0.0002333	0.0003543	0	0.000395267	4.81333e-07
	425.5	0.00468733	0.003592	0.00262467	0.00101473	2.408e-06	0.000303567	0.000388367	0	0.000448033	5.45057e-05
	426	0.00503867	0.00383033	0.00279867	0.00107817	1.648e-05	0.000373833	0.000402267	0	0.0004542	0.00010133
	426.5	0.005431	0.004062	0.00296033	0.00114263	2.16e-05	0.000422733	0.000421433	0	0.0004592	0.0001439
	427	0.005861	0.00433133	0.00315833	0.00123867	4.16e-05	0.000452033	0.000477733	2.872e-05	0.000498867	0.0001843
	427.5	0.00628133	0.00464267	0.00339533	0.00135967	7.19e-05	0.000509267	0.000541567	5.94333e-05	0.000535033	0.000244233
	428	0.006727	0.00496733	0.00361533	0.001507	0.000119417	0.000544733	0.000572633	8.53233e-05	0.000592533	0.000277167
	428.5	0.007205	0.00532667	0.00385033	0.001588	0.000141793	0.000573733	0.000604433	0.000114453	0.000638967	0.000292667
	429	0.007725	0.00567533	0.00405633	0.00165533	0.00015417	0.000597367	0.0006417	0.000160553	0.000696567	0.0002961
	429.5	0.008312	0.006102	0.00434967	0.00175867	0.000198283	0.000626667	0.000691667	0.000222833	0.000784	0.000297467
	430	0.00894467	0.00653133	0.00467133	0.00189733	0.000289933	0.0006753	0.000744533	0.000257267	0.000858233	0.0003504
	430.5	0.00969567	0.00698367	0.005003	0.00210633	0.000454233	0.000728	0.0008053	0.0003086	0.000947133	0.000426667
	431	0.0105267	0.00746667	0.00533633	0.002309	0.000645433	0.000779433	0.000871633	0.000376833	0.0010335	0.000502433
	431.5	0.0113767	0.00795833	0.005689	0.002483	0.000800833	0.000829167	0.000980633	0.0004814	0.00110753	0.0006087
	432	0.0122967	0.00853333	0.00610167	0.00269133	0.000974733	0.0009211	0.00107713	0.000564867	0.00118033	0.0007162
	432.5	0.0132767	0.00917867	0.00657233	0.00289467	0.00112227	0.00101247	0.001183	0.000627767	0.001269	0.0008584
	433	0.0143867	0.009879	0.00706	0.003147	0.0012786	0.00110477	0.00127333	0.0006731	0.00138367	0.0009672
	433.5	0.0156267	0.0106867	0.00760733	0.00343833	0.001455	0.00117633	0.00136267	0.0007542	0.001552	0.00101003
	434	0.0169367	0.0115933	0.00821333	0.00372433	0.00162333	0.00128033	0.00147033	0.000860667	0.00169633	0.000986967
	434.5	0.0183267	0.0125433	0.008899	0.004018	0.00180767	0.00141067	0.001583	0.0009616	0.00183167	0.000898067
	435	0.0197967	0.0135833	0.00964	0.00432267	0.00200867	0.00155767	0.001722	0.0010654	0.00195467	0.000868967
	435.5	0.0213833	0.01467	0.0104633	0.004678	0.00224733	0.00170733	0.00187167	0.00116433	0.00212367	0.000995633
	436	0.02314	0.01585	0.0113367	0.00508367	0.00251767	0.00188467	0.00202533	0.001275	0.00233467	0.00126137
	436.5	0.02504	0.0171233	0.0122833	0.00554033	0.002794	0.00207767	0.002197	0.001402	0.00254233	0.00159567
	437	0.0271767	0.01849	0.0132833	0.00605367	0.003108	0.00231567	0.002382	0.00155	0.002764	0.00186433
	437.5	0.02945	0.02001	0.01437	0.006589	0.00343933	0.002551	0.00258333	0.001706	0.00297133	0.002071
	438	0.0319033	0.0216633	0.0155367	0.00721367	0.00385133	0.00282167	0.00283067	0.00190533	0.00315967	0.00226767
	438.5	0.03458	0.0234533	0.0168233	0.00783467	0.00428633	0.00310833	0.00309267	0.00212033	0.003368	0.00250667
	439	0.0374533	0.0254367	0.0182233	0.00847333	0.004728	0.00339467	0.00335933	0.002345	0.003651	0.002751
	439.5	0.0405933	0.0275367	0.0196867	0.009157	0.00516967	0.00368067	0.003642	0.00258733	0.004008	0.00298367
	440	0.04394	0.0297933	0.0212933	0.00989433	0.00563267	0.00399267	0.00393533	0.00284467	0.00441567	0.00324
	440.5	0.0475667	0.0322667	0.0230767	0.0107523	0.006197	0.00434767	0.00428967	0.00315433	0.00485033	0.00355633
	441	0.0514533	0.0349167	0.0250567	0.0117033	0.00683967	0.00476367	0.00467367	0.00348067	0.005285	0.00395333
	441.5	0.0556267	0.03783	0.0272167	0.0127133	0.00753467	0.00520833	0.00508233	0.00381067	0.00576467	0.00437533
	442	0.0600467	0.0409433	0.0294567	0.0137833	0.00826033	0.00565133	0.00553233	0.00416	0.00627033	0.00480167
	442.5	0.0647667	0.04428	0.0318167	0.0149467	0.00904333	0.006117	0.00601	0.00452867	0.00678433	0.00520433
	443	0.0698267	0.0478067	0.03432	0.0162133	0.00992067	0.00665733	0.006528	0.004948	0.007297	0.00562567
	443.5	0.0752933	0.05164	0.0370733	0.0176033	0.0108683	0.007236	0.007084	0.005388	0.00786033	0.00608633
	444	0.0812467	0.05583	0.04013	0.01914	0.0118767	0.00791633	0.00767167	0.00585733	0.00849767	0.006593
	444.5	0.0876967	0.0603467	0.0434633	0.0207633	0.0129067	0.00860633	0.008316	0.00636233	0.009192	0.007154
	445	0.0947333	0.06533	0.0471233	0.0225433	0.0140267	0.009298	0.00902967	0.00692867	0.00995133	0.007768
	445.5	0.102207	0.0706467	0.0510567	0.0244633	0.0152667	0.0100463	0.009785	0.00751433	0.0107347	0.00844767
	446	0.110167	0.0763667	0.0553433	0.0265633	0.0166133	0.0108397	0.0106187	0.00817667	0.01158	0.00913933
	446.5	0.118733	0.0825533	0.0599667	0.02888	0.0181133	0.01178	0.01152	0.008882	0.0125033	0.00989867
	447	0.128	0.0891567	0.06494	0.0314167	0.0197567	0.0127967	0.0125133	0.00964767	0.0135367	0.0107047
	447.5	0.138267	0.0964833	0.0704333	0.0342	0.0216	0.0139133	0.0136	0.010497	0.0147067	0.0116167
	448	0.1493	0.1045	0.07643	0.03721	0.0236467	0.0151533	0.0148	0.011442	0.01594	0.0126433
	448.5	0.161167	0.1131	0.08291	0.0404733	0.02583	0.0165133	0.0160933	0.0124967	0.0172567	0.01372
	449	0.174067	0.122667	0.09001	0.04416	0.0282067	0.0180367	0.0174667	0.01365	0.0186967	0.01492
	449.5	0.187933	0.132867	0.09766	0.0481267	0.0307233	0.01967	0.01895	0.0148733	0.0202767	0.01621
	450	0.2035	0.1443	0.10618	0.0526233	0.03358	0.0214233	0.0206	0.0162133	0.0220367	0.0176667
	450.5	0.220167	0.1566	0.115367	0.05741	0.0366967	0.0232967	0.0224733	0.0176967	0.0239333	0.01924
	451	0.2366	0.169867	0.125267	0.0625567	0.0400867	0.02536	0.02456	0.0192967	0.0260067	0.0209467
	451.5	0.2492	0.184267	0.136167	0.0682067	0.0438367	0.0276633	0.02683	0.02102	0.0282867	0.0228033
	452	0.2565	0.199633	0.147967	0.07424	0.04782	0.0301733	0.0291767	0.0228167	0.0307433	0.0248167
	452.5	0.258233	0.216	0.160633	0.08071	0.0521167	0.0328033	0.0316667	0.0247733	0.0332967	0.0269533
	453	0.257	0.232433	0.1737	0.0875233	0.05668	0.03554	0.0342667	0.0268367	0.03598	0.02919
	453.5	0.2564	0.245533	0.1878	0.0949633	0.0616233	0.0385033	0.03711	0.02912	0.0389	0.03158
	454	0.2561	0.2541	0.202433	0.102927	0.0668667	0.0416833	0.04014	0.03153	0.04198	0.0341233
	454.5	0.2556	0.2572	0.216267	0.1113	0.0723767	0.0450333	0.0433567	0.0340833	0.0452467	0.0368233
	455	0.2547	0.2564	0.228833	0.1202	0.0781867	0.04858	0.0467467	0.03679	0.0486667	0.0397333
	455.5	0.2532	0.2549	0.239167	0.1294	0.0843033	0.0522333	0.05036	0.03966	0.05228	0.04279
	456	0.2518	0.2535	0.246167	0.1389	0.0905667	0.0560167	0.05407	0.04261	0.05605	0.04595
	456.5	0.2505	0.2521	0.250133	0.148567	0.09695	0.0599633	0.0579167	0.0455533	0.0599	0.0491667
	457	0.2493	0.2509	0.250633	0.158233	0.10341	0.06384	0.0617533	0.0485133	0.06376	0.0523867
	457.5	0.2479	0.2494	0.2494	0.167733	0.109797	0.06765	0.0654867	0.0514367	0.0675	0.0556033
	458	0.2468	0.2483	0.2483	0.177167	0.1162	0.07144	0.0691733	0.0544033	0.0711933	0.0588833
	458.5	0.2459	0.2475	0.2475	0.186367	0.1224	0.07517	0.0727767	0.05736	0.0748633	0.0620867
	459	0.2452	0.2468	0.2468	0.195167	0.1284	0.0788433	0.0763	0.0601867	0.0784533	0.0651733
	459.5	0.2444	0.2459	0.2459	0.2033	0.133867	0.0821833	0.0795233	0.0626567	0.08176	0.0679667
	460	0.2436	0.2451	0.2451	0.210733	0.138933	0.0852667	0.0825067	0.06489	0.08475	0.07056
	460.5	0.2427	0.2442	0.2442	0.216733	0.143233	0.08786	0.085	0.0667567	0.0872167	0.07287
	461	0.2423	0.2438	0.2438	0.2215	0.147	0.0902033	0.0871833	0.06846	0.0894233	0.0748933
	461.5	0.242	0.2435	0.2435	0.224833	0.150033	0.0920767	0.0890467	0.0699533	0.0912967	0.0765167
	462	0.2415	0.2431	0.2431	0.226667	0.1522	0.09345	0.0904433	0.0711067	0.0927467	0.0777633
	462.5	0.2414	0.243	0.243	0.227933	0.153633	0.09437	0.0913767	0.0718867	0.0937633	0.0786167
	463	0.2412	0.2429	0.2429	0.228067	0.154033	0.0945867	0.0916433	0.0721067	0.0941167	0.0789933
	463.5	0.2409	0.2426	0.2426	0.2274	0.153633	0.0943533	0.0913567	0.0719533	0.09396	0.0789833
	464	0.2396	0.2412	0.2412	0.225533	0.1522	0.0935	0.09057	0.07133	0.09325	0.07843
	464.5	0.2384	0.2401	0.2401	0.223133	0.1502	0.0923133	0.0894867	0.0704567	0.09216	0.0775333
	465	0.2374	0.2391	0.2391	0.2201	0.147567	0.0906967	0.08803	0.06925	0.09065	0.0762033
	465.5	0.2368	0.2385	0.2385	0.216067	0.1443	0.0887133	0.0861467	0.0677033	0.08865	0.0744767
	466	0.2364	0.2382	0.2382	0.210967	0.140333	0.0864067	0.0839	0.06593	0.0863167	0.0725167
	466.5	0.2358	0.2375	0.2375	0.2045	0.135867	0.0838267	0.0813133	0.0639467	0.08378	0.0704367
	467	0.2356	0.2371	0.2371	0.1974	0.131133	0.08106	0.0785633	0.0618467	0.0811767	0.0682733
	467.5	0.2358	0.2374	0.2374	0.1901	0.126267	0.0780867	0.0756533	0.0595733	0.07839	0.0658933
	468	0.2357	0.2373	0.2373	0.182267	0.1211	0.07494	0.07256	0.0571533	0.0753267	0.0632733
	468.5	0.2353	0.2369	0.2369	0.174033	0.115637	0.0716433	0.0693633	0.05462	0.0720267	0.0604867
	469	0.2349	0.2365	0.2365	0.1658	0.11008	0.0682933	0.06617	0.0520633	0.0686867	0.05774
	469.5	0.2345	0.236	0.236	0.1578	0.104717	0.06503	0.0630767	0.0496067	0.0655167	0.0551433
	470	0.234	0.2355	0.2355	0.150233	0.0996	0.0619267	0.0601333	0.0472533	0.0624833	0.0526167
	470.5	0.2334	0.235	0.235	0.1432	0.0949167	0.0590533	0.0574033	0.0451067	0.05967	0.0502267
	471	0.2326	0.2343	0.2343	0.136667	0.0905967	0.0564267	0.0548267	0.0430833	0.05711	0.04793
	471.5	0.2319	0.2334	0.233033	0.130467	0.0863867	0.0539667	0.0523767	0.0411467	0.05463	0.0457567
	472	0.2306	0.2321	0.230167	0.124567	0.08244	0.05162	0.0500067	0.0392833	0.05221	0.0437267
	472.5	0.2291	0.2305	0.225733	0.119033	0.0786367	0.0493233	0.0477733	0.0375067	0.04991	0.0418467
	473	0.2275	0.2288	0.219933	0.113933	0.0751867	0.04717	0.0456967	0.03586	0.0477733	0.0401333
	473.5	0.2265	0.2279	0.214233	0.109387	0.0722367	0.0452733	0.0438833	0.03443	0.0459333	0.03855
	474	0.2257	0.2272	0.208833	0.105267	0.0695233	0.04359	0.0422367	0.0331333	0.0442233	0.0370433
	474.5	0.225	0.2265	0.203833	0.10157	0.0670667	0.0420933	0.0407633	0.0319533	0.0426033	0.0356333
	475	0.224	0.2256	0.1992	0.0981833	0.06478	0.0407167	0.0394533	0.0309	0.0411433	0.0343467
	475.5	0.2222	0.2237	0.194433	0.0949833	0.0625567	0.0393267	0.03816	0.0298567	0.0397633	0.0332067
	476	0.2205	0.222	0.189767	0.0919333	0.0604667	0.03804	0.0369333	0.02888	0.0384833	0.0321667
	476.5	0.2194	0.2208	0.185033	0.08909	0.0585633	0.0368267	0.03576	0.0279833	0.0372967	0.0312033
	477	0.2187	0.2201	0.18	0.08637	0.0567667	0.0357267	0.0346467	0.0271333	0.03617	0.03025
	477.5	0.2177	0.219	0.1746	0.0837867	0.0550267	0.03467	0.03361	0.0263233	0.03509	0.02927
	478	0.2158	0.216567	0.169133	0.0812167	0.0532667	0.0335967	0.03259	0.02551	0.03399	0.0282933
	478.5	0.2135	0.212167	0.163767	0.0786433	0.05155	0.0324867	0.03156	0.02469	0.0328733	0.0273567
	479	0.2114	0.2065	0.158567	0.0760533	0.04989	0.0314133	0.0305667	0.0238833	0.0317767	0.0264833
	479.5	0.2101	0.200267	0.153567	0.0734833	0.0483	0.0303633	0.0295867	0.0230967	0.0307133	0.0256533
	480	0.2093	0.193667	0.148533	0.0709467	0.04668	0.02936	0.02856	0.0223133	0.0296667	0.0248033
	480.5	0.2082	0.1867	0.1433	0.0683533	0.0449933	0.0283467	0.0275	0.0215067	0.02857	0.0239167
	481	0.2066	0.1794	0.1378	0.06566	0.0432367	0.0272967	0.02639	0.02069	0.0274267	0.02297
	481.5	0.2044	0.172067	0.132267	0.0629333	0.0414467	0.0262367	0.0253233	0.0198667	0.02629	0.022
	482	0.202	0.1647	0.126667	0.0601733	0.0396467	0.0251167	0.0242867	0.0190467	0.0251467	0.0210333
	482.5	0.2002	0.157767	0.121333	0.0576433	0.0379633	0.0240467	0.0233267	0.0182633	0.0240967	0.0201233
	483	0.198433	0.1508	0.116033	0.0551967	0.0363667	0.0230233	0.0223467	0.0174867	0.0230933	0.0192333
	483.5	0.195267	0.1439	0.110893	0.05282	0.0348333	0.0220433	0.0213833	0.0167267	0.0221133	0.0183767
	484	0.189767	0.137067	0.105723	0.0504233	0.0332767	0.02109	0.02041	0.0159533	0.0210833	0.0175
	484.5	0.1821	0.130533	0.100737	0.0480967	0.0317233	0.0201467	0.01946	0.0151967	0.0200767	0.01664
	485	0.1735	0.124367	0.0960833	0.0458833	0.0302267	0.0192567	0.0185667	0.0144833	0.0191	0.01583
	485.5	0.1651	0.118667	0.09168	0.0438133	0.0288367	0.0183867	0.0177667	0.01383	0.0182033	0.0150967
	486	0.1571	0.113167	0.0875767	0.04186	0.0275533	0.0175633	0.01703	0.0132367	0.01736	0.0144067
	486.5	0.149567	0.108	0.0835567	0.0399767	0.0263533	0.0167667	0.0163567	0.0126933	0.0165467	0.0137467
	487	0.142467	0.103	0.0796933	0.0382133	0.02523	0.0160167	0.0156867	0.0121833	0.0158167	0.0130967
	487.5	0.135867	0.09834	0.07614	0.0365533	0.0241467	0.0153633	0.0150267	0.0116833	0.0151567	0.0125267
	488	0.1296	0.0939667	0.0728467	0.03504	0.02315	0.01478	0.0144067	0.01121	0.0145367	0.0120067
	488.5	0.123733	0.0899133	0.06987	0.03366	0.0222167	0.0142333	0.01384	0.0107633	0.0139267	0.0115567
	489	0.118167	0.0861167	0.0670567	0.03232	0.0213567	0.01375	0.0133267	0.010357	0.01334	0.0111
	489.5	0.112967	0.0826033	0.0643667	0.03108	0.0205633	0.0132633	0.01285	0.00998433	0.0128133	0.0106543
	490	0.108133	0.0793467	0.0618333	0.02993	0.0198433	0.01281	0.01239	0.009609	0.0123233	0.0102257
	490.5	0.103767	0.0763467	0.0595733	0.0289433	0.01922	0.0124033	0.0119667	0.009265	0.0119067	0.009864
	491	0.09984	0.0736367	0.0576233	0.0280967	0.0186433	0.0120233	0.01158	0.00897033	0.0115433	0.00956767
	491.5	0.0961567	0.0710933	0.0558567	0.02729	0.0181033	0.01169	0.0112333	0.00871333	0.0112053	0.009306
	492	0.0926867	0.06879	0.0542167	0.0265567	0.0176133	0.01139	0.0109397	0.00848867	0.010886	0.00907
	492.5	0.0893933	0.06664	0.0526133	0.0258733	0.0171933	0.0111	0.0106747	0.00827933	0.01056	0.00885033
	493	0.0862733	0.0645867	0.0510567	0.02527	0.01683	0.01084	0.0104407	0.00808233	0.0102447	0.00862367
	493.5	0.08335	0.0626867	0.0496133	0.02469	0.0164867	0.0106193	0.010253	0.007916	0.009956	0.00840267
	494	0.08061	0.06088	0.0482567	0.0241	0.0161167	0.0104077	0.0100453	0.00775367	0.00968333	0.00816633
	494.5	0.07813	0.0592533	0.04703	0.0235767	0.0157967	0.010202	0.00984067	0.00759333	0.00943833	0.00796533
	495	0.0757833	0.0577533	0.0459333	0.0231	0.0154933	0.00998167	0.009672	0.007444	0.00923367	0.00781267
	495.5	0.0735067	0.0562767	0.0449033	0.0226933	0.0152333	0.00977933	0.009516	0.007286	0.00904267	0.00767833
	496	0.07127	0.0547433	0.0438467	0.0222767	0.0149767	0.00960533	0.00938867	0.00712467	0.00884267	0.00755967
	496.5	0.06909	0.0531633	0.04275	0.0218333	0.01472	0.00943967	0.00925233	0.00699	0.00863467	0.00743467
	497	0.06691	0.0515533	0.0415933	0.0213733	0.0144433	0.009264	0.00907867	0.00688033	0.00839833	0.007299
	497.5	0.0647367	0.0499967	0.04047	0.0209167	0.0142	0.009096	0.00888733	0.00678267	0.008157	0.00718867
	498	0.0625567	0.0485667	0.0394167	0.0204433	0.0139233	0.00894033	0.008672	0.006663	0.00794767	0.007062
	498.5	0.0604267	0.0472333	0.0384067	0.01997	0.0136433	0.00879	0.00847	0.006511	0.00779933	0.00693267
	499	0.0583533	0.04591	0.0373833	0.0194733	0.01336	0.00863367	0.00828833	0.00637333	0.00766633	0.006776
	499.5	0.0562733	0.0445567	0.0363467	0.01899	0.0130767	0.00845067	0.008134	0.00624767	0.007505	0.00659533
	500	0.0542433	0.04315	0.0353	0.01855	0.0128033	0.00826167	0.007982	0.00614133	0.00730467	0.00640567
	500.5	0.0522933	0.0417567	0.0342667	0.0181433	0.01252	0.008076	0.00786233	0.00603367	0.007094	0.00622767
	501	0.0504467	0.04041	0.0332633	0.01775	0.0122567	0.00788967	0.00770867	0.00588833	0.00691633	0.00608767
	501.5	0.0486267	0.0391067	0.0322767	0.01734	0.0119967	0.00773667	0.00755533	0.005763	0.00676367	0.005949
	502	0.0468133	0.0378067	0.0313067	0.0168933	0.0117433	0.00759467	0.00739933	0.005632	0.00660867	0.00583667
	502.5	0.04498	0.03654	0.0303633	0.01639	0.0114433	0.00746733	0.007261	0.00553133	0.00646767	0.005709
	503	0.04312	0.03523	0.0293967	0.0158633	0.0111067	0.007335	0.00712567	0.00543633	0.00632367	0.005559
	503.5	0.0413233	0.0339767	0.02844	0.0153833	0.0107777	0.007176	0.006979	0.00533533	0.00618167	0.00541733
	504	0.03959	0.0327767	0.0275067	0.01495	0.0104997	0.00700467	0.00682233	0.00523433	0.00603433	0.00528
	504.5	0.03794	0.0315833	0.0265733	0.01458	0.01027	0.00683033	0.00667233	0.00511233	0.005842	0.00517533
	505	0.0364133	0.0304533	0.0256967	0.0142067	0.010063	0.00666667	0.00652567	0.00496667	0.00565267	0.00508167
	505.5	0.0349933	0.0293533	0.0248633	0.0138467	0.00984067	0.00653867	0.00637367	0.00483033	0.00550233	0.004956
	506	0.0336433	0.0282933	0.02405	0.0134567	0.00957733	0.00642467	0.00623	0.004716	0.005376	0.004814
	506.5	0.03234	0.02728	0.02325	0.01308	0.00930567	0.006317	0.006116	0.00464433	0.00527333	0.00469367
	507	0.0311167	0.0264	0.0225467	0.0127533	0.009081	0.00621367	0.00601967	0.00458767	0.00517133	0.004609
	507.5	0.0299267	0.0255467	0.0218767	0.0124367	0.008884	0.00610033	0.00592033	0.00451333	0.005067	0.00456467
	508	0.0288167	0.02476	0.0212433	0.0121367	0.00871633	0.00601333	0.00585267	0.004425	0.004991	0.00447733
	508.5	0.02777	0.0239833	0.0205933	0.0118167	0.00854333	0.005949	0.005793	0.00434767	0.00488267	0.00441367
	509	0.0267367	0.0232	0.0199467	0.0115333	0.00838667	0.00588733	0.005732	0.004283	0.00477433	0.004362
	509.5	0.0257567	0.0224833	0.0193667	0.0112867	0.00823467	0.00581767	0.00567767	0.004243	0.00464367	0.00431633
	510	0.0247933	0.0217433	0.01881	0.0110567	0.00809133	0.00572367	0.005601	0.004194	0.00454233	0.00424967
	510.5	0.02389	0.02109	0.0183267	0.0108733	0.007962	0.00564967	0.00554933	0.00416867	0.00444333	0.00417367
	511	0.0231	0.02049	0.0178467	0.0106993	0.00784667	0.00561233	0.00549667	0.00415	0.00436167	0.00411867
	511.5	0.0223767	0.0199533	0.0174033	0.0105437	0.00773933	0.00557267	0.00543333	0.00411	0.00432733	0.00408267
	512	0.0216967	0.0194133	0.0169567	0.010369	0.00761667	0.00551567	0.00534567	0.00405933	0.004303	0.00405867
	512.5	0.0210733	0.01888	0.01652	0.0101917	0.007518	0.00544667	0.00525067	0.00400233	0.00428667	0.004006
	513	0.0203867	0.01835	0.0161033	0.0100357	0.007413	0.00538033	0.005171	0.003965	0.00423567	0.00397033
	513.5	0.0197233	0.01783	0.01571	0.009891	0.00732367	0.00532933	0.005143	0.00397067	0.00418767	0.00390267
	514	0.0190333	0.0173267	0.0153267	0.00974533	0.00720833	0.00527367	0.00514667	0.00395	0.004146	0.00383667
	514.5	0.0183933	0.01685	0.0149333	0.00957067	0.00708933	0.005205	0.00515333	0.003919	0.00411767	0.00379967
	515	0.01782	0.0163867	0.0145333	0.00936767	0.006958	0.005143	0.00510833	0.00386367	0.004075	0.003774
	515.5	0.01726	0.0159433	0.0141367	0.009149	0.00681233	0.00511367	0.00503733	0.003806	0.00404567	0.00374533
	516	0.0167133	0.0155167	0.0137667	0.00895433	0.00667833	0.00507633	0.00495733	0.00375867	0.00403067	0.003695
	516.5	0.0162033	0.0151133	0.01345	0.00878333	0.00654533	0.00503567	0.004879	0.003707	0.00400533	0.00361967
	517	0.0157033	0.0147067	0.01314	0.008639	0.00642933	0.00495233	0.00483733	0.00367267	0.00397033	0.00357133
	517.5	0.01521	0.01427	0.01283	0.00848733	0.00631633	0.00487467	0.00478867	0.003638	0.00390833	0.00355967
	518	0.01472	0.0137933	0.0124767	0.00830833	0.00622433	0.00482667	0.004745	0.00363133	0.00384633	0.00354833
	518.5	0.0142067	0.0133433	0.0121067	0.00808867	0.006123	0.00479033	0.00468333	0.00360633	0.00376233	0.00353567
	519	0.0137267	0.01293	0.0117367	0.00785667	0.00599067	0.00474467	0.00461233	0.00355367	0.00368367	0.00346233
	519.5	0.0132367	0.0125533	0.0113667	0.00765	0.00584133	0.00466633	0.004561	0.003508	0.00360933	0.00341267
	520	0.0127433	0.0121833	0.0110413	0.00746933	0.005693	0.004566	0.00450667	0.003462	0.00353033	0.003383
	520.5	0.0122433	0.0118033	0.0107163	0.007296	0.00555067	0.004437	0.00444667	0.00341067	0.00348633	0.00334767
	521	0.01176	0.0114367	0.010361	0.007106	0.005389	0.004316	0.00436033	0.00332733	0.003437	0.00328033
	521.5	0.0113333	0.0110567	0.00999833	0.00689533	0.00521167	0.00420967	0.00427567	0.003242	0.00336433	0.00319267
	522	0.011	0.01067	0.00963233	0.00669867	0.00503667	0.00413533	0.00419433	0.003188	0.00330167	0.00312633
	522.5	0.0106567	0.0102973	0.009317	0.00652533	0.004894	0.004047	0.00411433	0.003142	0.003213	0.00304033
	523	0.0103067	0.00995367	0.00904333	0.00636667	0.00475567	0.00395033	0.004019	0.00308467	0.00316433	0.00298733
	523.5	0.00992633	0.00961333	0.008781	0.00620133	0.00463	0.00383633	0.00392733	0.00300467	0.00310533	0.00292333
	524	0.00954167	0.00927433	0.00849833	0.00600467	0.00448433	0.00373233	0.00382167	0.00292333	0.00302333	0.002882
	524.5	0.00917167	0.00891067	0.00818233	0.005789	0.00434333	0.00362533	0.003724	0.00286167	0.00295267	0.00283267
	525	0.00880333	0.00856533	0.00787633	0.00556967	0.00419367	0.00352867	0.00362033	0.00280467	0.00286533	0.00275267
	525.5	0.008493	0.008276	0.00760733	0.00537533	0.004036	0.00345233	0.003498	0.002727	0.002806	0.00266133
	526	0.008209	0.00799533	0.00733167	0.00520933	0.00387767	0.00337933	0.00338267	0.00263633	0.00276133	0.00254267
	526.5	0.00791733	0.007715	0.00704767	0.005036	0.003692	0.003302	0.00329	0.002552	0.0027	0.002441
	527	0.00762833	0.00744433	0.00676033	0.004853	0.00351367	0.003216	0.00323033	0.002491	0.00262933	0.002392
	527.5	0.00732767	0.007188	0.00652933	0.00466233	0.003359	0.00312133	0.003173	0.002427	0.00255133	0.002373
	528	0.00708133	0.006997	0.006354	0.004501	0.00323433	0.00300767	0.003096	0.00235233	0.00248967	0.00232533
	528.5	0.00684533	0.00681467	0.00619167	0.00437467	0.003142	0.002903	0.00298833	0.00225433	0.00243467	0.00222433
	529	0.00662867	0.00661367	0.00602033	0.00426567	0.00306367	0.002795	0.002903	0.00217567	0.002375	0.00209667
	529.5	0.00641333	0.006399	0.005846	0.004151	0.00298533	0.00271133	0.00280333	0.00209067	0.00230467	0.00200533
	530	0.00619967	0.00612267	0.005617	0.00401367	0.00287167	0.00263067	0.00271667	0.00201367	0.00222967	0.00193267
	530.5	0.00600133	0.00586867	0.00539033	0.003852	0.00272233	0.002537	0.00262233	0.001959	0.00215333	0.001885
	531	0.00578367	0.00568733	0.005238	0.00372067	0.00258133	0.00246333	0.00256867	0.00191967	0.00210367	0.00184567
	531.5	0.00554767	0.005548	0.005118	0.00360733	0.00248667	0.00239733	0.002523	0.001879	0.00206567	0.00181867
	532	0.00531667	0.00545767	0.005039	0.00351633	0.002425	0.00233967	0.002453	0.00181167	0.00202	0.001776
	532.5	0.005154	0.005284	0.00485833	0.00342067	0.00236	0.00228433	0.00235433	0.00172667	0.00195633	0.00169533
	533	0.00505833	0.005108	0.00465867	0.00328433	0.002223	0.00220567	0.00224433	0.001635	0.00188833	0.001611
	533.5	0.00497867	0.004937	0.00449267	0.00314633	0.002085	0.00212567	0.00217133	0.00155867	0.001845	0.001546
	534	0.00485	0.004792	0.004353	0.00302067	0.001963	0.00202933	0.00213067	0.00150767	0.001756	0.001522
	534.5	0.00468233	0.00470067	0.00426733	0.00293267	0.00190367	0.00193933	0.00210467	0.00146633	0.00163933	0.00149433
	535	0.004484	0.00460667	0.00415367	0.00286767	0.00185867	0.001874	0.002049	0.00142167	0.00152533	0.001438
	535.5	0.0043	0.004513	0.00405633	0.002789	0.00179133	0.00184833	0.00197233	0.001363	0.001446	0.001389
	536	0.00415333	0.00437367	0.003936	0.00270433	0.00170967	0.00184033	0.00187867	0.00131133	0.00141267	0.00135
	536.5	0.00405267	0.00421733	0.00382633	0.00260033	0.00161933	0.00178167	0.00178433	0.00126567	0.00138733	0.00129867
	537	0.00397967	0.00405733	0.00370133	0.002532	0.00156967	0.00170233	0.001729	0.001238	0.00138333	0.00122233
	537.5	0.00389367	0.003928	0.00357333	0.00246233	0.00149667	0.001581	0.00167333	0.00119867	0.00137167	0.00112
	538	0.003806	0.003806	0.00344933	0.00238867	0.001418	0.00151133	0.001639	0.00117433	0.00134233	0.0010147
	538.5	0.00372067	0.00367767	0.00332133	0.00229167	0.001324	0.00145633	0.00158033	0.001135	0.001301	0.000913733
	539	0.00362133	0.00356967	0.00320533	0.00220533	0.00126267	0.001403	0.00152667	0.001081	0.00127367	0.000814633
	539.5	0.00351767	0.00346767	0.00309167	0.00210933	0.00119533	0.00133333	0.00144567	0.000980033	0.00125033	0.000685
	540	0.00338933	0.003381	0.00299367	0.00203433	0.00113667	0.001235	0.00139867	0.0008887	0.00122833	0.0004981
	540.5	0.003287	0.00330367	0.00290667	0.001961	0.00106153	0.00113367	0.00135167	0.000797333	0.00118633	0.000278033
	541	0.00319667	0.00322133	0.002813	0.00191767	0.00101047	0.00106757	0.00131667	0.000747167	0.00113533	0.000122877
	541.5	0.00311433	0.003149	0.00273033	0.00186733	0.000941533	0.001036	0.001262	0.000697067	0.0010683	8.003e-05
	542	0.003024	0.003094	0.00266633	0.00181767	0.000876	0.00105367	0.001204	0.000664867	0.00101397	9.67233e-05
	542.5	0.00295267	0.00301167	0.00261933	0.001732	0.000799233	0.00104867	0.00115533	0.000650333	0.0009803	0.000116637
	543	0.00289633	0.00293733	0.00256567	0.001658	0.000747033	0.0010176	0.001106	0.000622233	0.000946867	0.000126047
	543.5	0.002832	0.002835	0.00250967	0.001595	0.000699767	0.0009498	0.001053	0.0005833	0.000916833	0.000124297
	544	0.00274533	0.00278467	0.00246933	0.00154067	0.0006467	0.0008982	0.000976367	0.000504367	0.000863	5.77067e-05
	544.5	0.00265	0.00272367	0.002419	0.00145367	0.0005566	0.000868533	0.000942333	0.0004593	0.000826833	0
	545	0.002573	0.002644	0.00232967	0.00135633	0.000446967	0.0008362	0.000906667	0.000423267	0.0008164	0
	545.5	0.00252267	0.00253	0.002208	0.00125167	0.000351933	0.000810133	0.0008938	0.0004108	0.000817133	0
	546	0.002469	0.002409	0.002102	0.00118833	0.000306933	0.000771467	0.000886133	0.0004064	0.000825467	0
	546.5	0.00239067	0.002373	0.00206667	0.00118367	0.0003162	0.000745033	0.000879567	0.0003918	0.000807067	1.094e-06
	547	0.00229733	0.00238733	0.002059	0.0012	0.000316333	0.000706933	0.0008734	0.0003807	0.0007851	3.153e-05
	547.5	0.002227	0.00239567	0.002032	0.00123167	0.000305333	0.000674867	0.000858633	0.000369033	0.000746667	0.0001505
	548	0.00218867	0.00232833	0.00194933	0.00124033	0.000292267	0.000660333	0.000865467	0.000386667	0.000730233	0.0002052
	548.5	0.00214	0.002198	0.00184633	0.001223	0.000279233	0.0006945	0.0008861	0.0004209	0.000699567	0.000247533
	549	0.002084	0.00208833	0.001758	0.00122733	0.000288433	0.000727433	0.0009004	0.0004381	0.0006863	0.000260867
	549.5	0.002031	0.002041	0.001723	0.00123233	0.000292233	0.000715067	0.000874333	0.000418	0.0006668	0.0002728
	550	0.00199333	0.00205667	0.001729	0.00123167	0.0002694	0.000663733	0.000816767	0.000363233	0.000652633	0.000304933
	550.5	0.00193567	0.00203733	0.00173867	0.00120033	0.0002314	0.000624767	0.0007726	0.000306	0.0006375	0.0003167
	551	0.001884	0.002016	0.00176433	0.0011505	0.000171367	0.000599767	0.000754367	0.000271533	0.000606267	0.000301867
	551.5	0.00185533	0.00196467	0.00176367	0.00112247	0.000154523	0.000584133	0.000720867	0.000248767	0.0005745	0.000269133
	552	0.00185367	0.00194567	0.00175167	0.00109883	0.000152953	0.0005334	0.0006826	0.0002449	0.0005655	0.000265333
	552.5	0.00183733	0.00192367	0.00170233	0.00106947	0.000162	0.0004907	0.000649867	0.000237533	0.000554367	0.000260433
	553	0.00178833	0.00184267	0.00159633	0.0009841	0.0001196	0.000457433	0.000649567	0.000235833	0.000550833	0.000267867
	553.5	0.001747	0.00179433	0.00153767	0.000927667	8.508e-05	0.000457933	0.000658	0.000235233	0.0005445	0.0003004
	554	0.001686	0.001739	0.00146967	0.0008988	6.43667e-05	0.000481933	0.000651	0.000218167	0.000530633	0.000344333
	554.5	0.00164167	0.001742	0.001444	0.000920667	6.24333e-05	0.0005059	0.000634067	0.0002014	0.0005029	0.000349033
	555	0.00161967	0.001733	0.001413	0.0009602	6.452e-05	0.000506867	0.000619933	0.0001808	0.0004527	0.000306967
	555.5	0.00161233	0.00172	0.001399	0.0009676	4.20067e-05	0.0004717	0.000581267	0.000155653	0.000402033	0.000244467
	556	0.00159867	0.00171333	0.00140833	0.000954267	8.27333e-06	0.000413133	0.000548667	0.000134767	0.000376033	0.0002033
	556.5	0.001559	0.00168167	0.00139767	0.000907067	0	0.000344467	0.000531567	0.000111073	0.000380133	0.000199133
	557	0.00150267	0.00165933	0.00137033	0.0008549	0	0.0003076	0.0005387	0.000113467	0.000387067	0.0001803
	557.5	0.00146633	0.001635	0.00135767	0.0008201	0	0.0002886	0.0005591	0.000107527	0.000398667	0.000186267
	558	0.00143333	0.00161767	0.00136167	0.000815267	0	0.000292067	0.000560433	0.000118037	0.0004118	0.000163233
	558.5	0.00140467	0.00156967	0.00136467	0.0007899	0	0.000299767	0.000546033	0.000120865	0.000423067	0.000135707
	559	0.00136367	0.00153333	0.001351	0.000762533	0	0.000309733	0.0005304	0.000120733	0.000408067	9.48533e-05
	559.5	0.001342	0.00149467	0.001311	0.000718333	0	0.0003167	0.000496167	0.00010605	0.0003731	9.44167e-05
	560	0.00131	0.00148033	0.00126933	0.000699833	0	0.000314967	0.000461167	7.243e-05	0.0003347	0.000121763
	560.5	0.00129467	0.00145533	0.00121533	0.000686467	0	0.000280367	0.000442333	4.235e-05	0.000332333	0.000152333
	561	0.00125367	0.00140567	0.00115533	0.000645	0	0.000237367	0.000443233	1.16623e-05	0.000334933	0.000164093
	561.5	0.00120967	0.00135533	0.00109533	0.000591633	0	0.0001762	0.0004407	3.7e-06	0.000336533	0.000163807
	562	0.00114367	0.001333	0.00108607	0.000567133	0	0.00015246	0.000384667	0	0.000301933	0.0001622
	562.5	0.001067	0.00136067	0.00110357	0.0005641	0	0.0001448	0.000326933	0	0.0002745	0.000153617
	563	0.001007	0.00139533	0.0011434	0.000564533	0	0.0001614	0.000275	0	0.0002382	8.32833e-05
	563.5	0.00101367	0.001373	0.00111763	0.0005401	0	0.000182267	0.0002626	0	0.000223167	3.8679e-05
	564	0.00105267	0.00131933	0.00106767	0.000554933	0	0.000173567	0.0002558	0	0.0002444	2.4128e-05
	564.5	0.001083	0.00124233	0.00100487	0.000571567	0	0.0001785	0.0002559	0	0.0002575	5.49633e-05
	565	0.001056	0.001157	0.0009486	0.000566233	0	0.000145567	0.000259267	0	0.000281167	6.23767e-05
	565.5	0.000980233	0.001078	0.000908	0.0005151	0	0.000100817	0.000262267	0	0.000292233	3.91533e-05
	566	0.000922933	0.00105633	0.000902	0.000458133	0	5.4536e-05	0.0002769	0	0.0002927	3.22533e-05
	566.5	0.000895133	0.001093	0.0009061	0.000440733	0	5.77867e-05	0.000280967	0	0.000281	3.1486e-05
	567	0.0008705	0.00116167	0.000925467	0.0004496	0	7.698e-05	0.000285133	0	0.000220267	2.96067e-05
	567.5	0.000868867	0.00117267	0.000898867	0.0004625	0	0.000128183	0.000249267	0	0.000166767	2.3568e-05
	568	0.000866967	0.00113467	0.0008492	0.000446	0	0.000150067	0.000240733	0	0.0001526	3.56067e-05
	568.5	0.000860033	0.00110367	0.0008253	0.000424533	0	0.00015438	0.000247067	0	0.000141823	5.995e-05
	569	0.000847967	0.00107333	0.0008161	0.000413133	0	0.00012073	0.000253267	0	0.00013416	4.71133e-05
	569.5	0.000845033	0.00109	0.0008461	0.000418033	0	6.89847e-05	0.000228633	0	0.00010131	3.772e-05
	570	0.0008789	0.001118	0.000868767	0.000412433	0	6.08593e-05	0.000211833	0	8.561e-05	4.12133e-05
	570.5	0.0008821	0.00110633	0.000876833	0.0003671	0	8.851e-05	0.000214367	0	8.64033e-05	5.61733e-05
	571	0.000877367	0.00107733	0.0008748	0.000347467	0	0.000108763	0.0002117	0	7.63967e-05	4.63333e-05
	571.5	0.000846633	0.00104963	0.000887333	0.000345633	0	0.00012454	0.000171633	0	0.00010339	1.34433e-05
	572	0.000834267	0.0010448	0.000875267	0.000375633	0	9.127e-05	0.000130183	0	0.000105137	0
	572.5	0.000803033	0.0010436	0.000850533	0.0003711	0	5.42833e-05	0.0001254	0	0.000123333	0
	573	0.000753967	0.00101233	0.000796067	0.000307	0	6.596e-06	0.0001397	0	0.00010871	0
	573.5	0.000729067	0.00101053	0.000759633	0.000250967	0	0	0.000131893	0	9.906e-05	0
	574	0.000690233	0.000998833	0.000723833	0.000226633	0	0	0.00013575	0	8.383e-05	0
	574.5	0.000667	0.000962567	0.000669333	0.000228027	0	1.00633e-05	0.000153567	0	6.74533e-05	0
	575	0.0006489	0.000899933	0.000615167	0.000238363	0	1.46767e-05	0.000164767	0	5.65167e-05	0
	575.5	0.000640867	0.0008748	0.000598267	0.000215277	0	4.39e-06	0.000146233	0	7.592e-05	0
	576	0.000640333	0.000912433	0.000646833	0.000212533	0	0	0.000107043	0	9.08167e-05	0
	576.5	0.0006031	0.00092	0.000673667	0.000216767	0	0	9.63997e-05	0	0.000125633	0
	577	0.000550167	0.000918433	0.000693033	0.000221133	0	0	0.000101195	0	9.60267e-05	0
	577.5	0.000510433	0.000846933	0.0006501	0.000227433	0	0	0.000106123	0	6.716e-05	0
	578	0.000454467	0.0007826	0.0006183	0.000198033	0	0	0.00011599	0	6.84783e-05	0
	578.5	0.000445367	0.000739267	0.000595633	0.0001536	0	0	9.80267e-05	0	0.000106277	0
	579	0.000432933	0.000727133	0.000585067	0.000119393	0	0	5.4177e-05	0	0.00013905	0
	579.5	0.000464933	0.0007374	0.000570433	9.61867e-05	0	0	4.08256e-05	0	0.000126743	0
	580	0.000514333	0.000738933	0.0005448	0.00013043	0	0	3.94567e-05	0	0.000100913	0
	580.5	0.0005584	0.000737167	0.000528367	0.000148523	0	0	3.85567e-05	0	5.51467e-05	0
	581	0.000545333	0.0007381	0.000504333	0.00019043	0	0	3.269e-05	0	2.2646e-05	0
	581.5	0.0004848	0.0007363	0.000483233	0.00016613	0	0	2.75133e-05	0	1.32933e-05	0
	582	0.0004146	0.000737567	0.000462867	0.000125367	0	0	2.389e-05	0	4.07767e-05	0
	582.5	0.000402233	0.000739567	0.000488	0.000106483	0	0	1.975e-05	0	8.9394e-05	0
	583	0.000400267	0.000758033	0.000532833	8.58067e-05	0	0	1.40933e-05	0	9.79167e-05	0
	583.5	0.000400033	0.000754833	0.000569967	0.00010682	0	0	6.78667e-06	0	5.80767e-05	0
	584	0.000359733	0.000773033	0.0006088	9.83133e-05	0	0	6.47233e-06	0	1.60543e-05	0
	584.5	0.000330067	0.0007732	0.0006145	0.000105559	0	0	1.309e-05	0	1.1175e-05	0
	585	0.000297933	0.000762833	0.0005939	9.5935e-05	0	0	3.04e-05	0	1.37582e-05	0
	585.5	0.000308533	0.0007157	0.0005316	8.011e-05	0	0	3.82567e-05	0	1.55353e-05	0
	586	0.0003276	0.000668667	0.000472633	6.90765e-05	0	0	6.628e-05	0	1.04773e-05	0
	586.5	0.000392833	0.0006329	0.000440767	7.18067e-05	0	0	6.04433e-05	0	1.37133e-05	0
	587	0.0003972	0.000620867	0.000418067	0.000115443	0	0	5.58467e-05	0	2.10733e-05	0
	587.5	0.000370667	0.000631633	0.000415633	0.000148313	0	0	5.25667e-05	0	1.72767e-05	0
	588	0.000303833	0.0006466	0.000412167	0.000127033	0	0	5.55333e-05	0	1.1245e-05	0
	588.5	0.000272033	0.000662	0.000411467	6.6285e-05	0	0	6.09077e-05	0	1.83493e-05	0
	589	0.000298067	0.000629167	0.000401633	3.12067e-05	0	0	4.90467e-05	0	1.9082e-05	0
	589.5	0.000297667	0.000549367	0.000344767	2.55367e-05	0	0	2.76477e-05	0	1.13533e-05	0
	590	0.000267167	0.000484033	0.000290533	4.816e-05	0	0	2.16767e-05	0	1.27373e-06	0
	590.5	0.000158633	0.000455133	0.000270567	6.15417e-05	0	0	1.50633e-05	0	2.12367e-06	0
	591	9.19967e-05	0.000475167	0.0002931	4.05107e-05	0	0	1.01067e-05	0	1.26033e-05	0
	591.5	5.41033e-05	0.000500933	0.000338833	4.06233e-05	0	0	4.95633e-06	0	1.919e-05	0
	592	8.26367e-05	0.000514733	0.000357367	4.379e-05	0	0	0	0	2.64167e-05	0
	592.5	0.000117683	0.000514433	0.000340767	4.97037e-05	0	0	0	0	1.169e-05	0
	593	0.00016539	0.0004965	0.000299867	5.30933e-05	0	0	0	0	0	0
	593.5	0.000173457	0.000453033	0.0002447	6.23703e-05	0	0	0	0	0	0
	594	0.0001692	0.0004348	0.000215667	8.28043e-05	0	0	0	0	0	0
	594.5	0.000121993	0.000451967	0.0002362	8.70267e-05	0	0	0	0	0	0
	595	9.548e-05	0.0005303	0.000296467	7.239e-05	0	0	0	0	0	0
	595.5	8.956e-05	0.000614233	0.0003754	6.73667e-05	0	0	0	0	0	0
	596	9.60977e-05	0.000615767	0.000390533	3.62667e-05	0	0	0	0	0	0
	596.5	9.572e-05	0.000598933	0.0004029	1.51433e-05	0	0	0	0	0	0
	597	7.247e-05	0.000536233	0.0003861	9.50667e-06	0	0	0	0	0	0
	597.5	3.583e-05	0.000479367	0.000352133	1.51e-05	0	0	0	0	0	0
	598	1.69982e-05	0.000410133	0.000280067	1.05933e-05	0	0	0	0	0	0
	598.5	5.97667e-06	0.000392333	0.0002229	0	0	0	0	0	0	0
	599	2.85667e-05	0.000429767	0.000237333	0	0	0	7.77e-06	0	0	0
	599.5	9.28467e-05	0.000475967	0.0002806	1.09167e-05	0	0	1.36067e-05	0	0	0
	600	0.00013871	0.0004578	0.000277867	2.452e-05	0	0	3.037e-06	0	0	0
	600.5	0.000167837	0.000460733	0.000285267	3.38e-05	0	0	0	0	0	0
	601	0.0001676	0.000477367	0.000300567	2.31633e-05	0	0	0	0	0	0
	601.5	0.0001437	0.000515767	0.000310967	1.002e-05	0	0	1.71827e-05	0	0	0
	602	7.59067e-05	0.000517033	0.000309767	3.73e-06	0	0	5.60033e-05	0	0	0
	602.5	5.57e-06	0.0005191	0.000312733	0	0	0	4.304e-05	0	0	0
	603	0	0.0005385	0.000379467	5.15e-06	0	0	1.1594e-05	0	0	0
	603.5	0	0.000525833	0.0003817	1.66567e-05	0	0	0	0	0	0
	604	0	0.000498	0.0003485	3.84e-05	0	0	0	0	1.56733e-05	0
	604.5	0	0.0004276	0.0002854	6.68033e-05	0	0	0	0	2.46167e-05	0
	605	0	0.000380167	0.0002385	7.37267e-05	0	0	6.22667e-07	0	2.27167e-05	0
	605.5	0	0.000395167	0.000246433	5.70967e-05	0	0	8.88333e-06	0	1.18833e-06	0
	606	0	0.000345067	0.000178967	1.04867e-05	0	0	4.14667e-06	0	0	0
	606.5	0	0.000314833	0.000137267	0	0	0	1.038e-07	0	4.15333e-07	0
	607	0	0.000258567	0.00011072	0	0	0	3.64667e-06	0	5.17e-06	0
	607.5	0	0.0003016	0.0001751	0	0	0	1.276e-05	0	0	0
	608	0	0.000343767	0.000225033	1.93967e-05	0	0	7.45667e-06	0	0	0
	608.5	0	0.000367167	0.000250233	3.9e-05	0	0	3.34333e-06	0	0	0
	609	0	0.000333933	0.000222033	4.43333e-05	0	0	2.159e-05	0	7.69667e-07	0
	609.5	0	0.0003215	0.000223167	2.22367e-05	0	0	2.03287e-05	0	1.745e-05	0
	610	0	0.000290367	0.000182033	0	0	0	9.79333e-06	0	9.09667e-06	0
	610.5	0	0.000239537	9.572e-05	0	0	0	0	0	0	0
	611	0	0.000198497	3.0384e-05	0	0	0	0	0	0	0
	611.5	0	0.000231167	4.377e-05	0	0	0	0	0	0	0
[truncated: 397 more rows]

## Sheet: Exp. B b3
Experiment B		Average of Bottle 3 measurements [W]; time in hours
[truncated: 843 more rows]
