# Supplementary material for: Off-line and on-line optical monitoring of microalgal growth
Source: PeerJ. 2019 Nov 1;7:e7956. doi: 10.7717/peerj.7956 (PMC6827447; doi:10.7717/peerj.7956)
Supplement: Supplemental Information 3 [file peerj-07-7956-s003.xlsx]

## Sheet: OD vs Bean penetration
	Time	Distance	L	Optical Density (OD)	ln(x/x0)	1/OD
	hours	cm	W
Experiment 1	0	9.5	0.57574	0.115	0	8.69565
	16	3.237	1.13268	0.384	1.20571	2.60417
	28	1.829	0.77768	0.773	1.90535	1.29366
	40	1.196	0.60868	1.02467	2.18719	0.975927
	52	1.055	0.5125	1.28867	2.41643	0.775996
	64	0.914	0.45478	1.698	2.69227	0.588928
	88	0.703	0.3563	2.018	2.86493	0.49554
Experiment 2	0	9.5	0.3445	0.108667	0	9.20245
	6	5.792	1.21482
	12	4.634	1.21588	0.164333	0.413612	6.08519
	24	1.506	1.01256	0.383	1.25975	2.61097
	30	1.158	0.8872
	36	0.753	0.71572	0.507333	1.54088	1.97109
	48	0.579	0.42374	0.872333	2.08289	1.14635
	60	0.463	0.42282	1.32933	2.50415	0.752257
	72	0.347	0.35586	1.66467	2.7291	0.600721
	78	0.231	0.28364
	84	0.231		1.726	2.76528	0.579374
	96	0.173	0.27064	1.82333	2.82014	0.548446
Experiment 3	0	9.5	0.102333	0.69436	0	9.77199
	4	8.26	0.119333	0.66536	0.153685	8.37989
	16	4.28	0.184333	0.5213	0.58851	5.42495
	19	4.13	0.183667	0.47398	0.584887	5.44465
	22	3.35	0.329333	0.468	1.16883	3.03644
	28	3.872	0.436667	1.21096	1.45093	2.29008
	40	2.581	0.479667	1.10004	1.54486	2.08478
	49	2.58	0.65	1.02538	1.84874	1.53846
	52	2.013	0.67	0.90812	1.87904	1.49254
	64	1.6	0.72	0.7879	1.95102	1.38889
	70	1.44	1.29	0.73624	2.53416	0.775194
	88	1.03	1.52	0.58898	2.69823	0.657895
	94	1.03	1.71	0.5669	2.81601	0.584795
Experiment 4	0	9.5	0.0976667	0.82804	0	10.2389
	6	9.01	0.101333	0.71756	0.0368551	9.86842
	12	6.785	0.135	0.57886	0.323714	7.40741
	24	6.543	0.172	0.56616	0.565934	5.81395
	30	4.846	0.238667	1.12146	0.893508	4.18994
	35	4.362	0.275333			3.63196
	48	3.681	0.28	1.06832	1.05323	3.57143
	54	3.7	0.300667	1.21072	1.12444	3.32594
	59	2.423	0.484667	1.0958	1.6019	2.06327
	72	2.278	0.333333	0.766726	1.22758	3
	78	2.181	0.404333	0.7804	1.42068	2.47321
	83	1.793	0.428667	0.71004	1.47912	2.33281
	96	1.647	0.371	0.78968	1.33464	2.69542
Experiment 5	0	9.5	0.105667	0.42604	0	9.46372
	12	6.18	0.197333	0.31594	0.624605	5.06757
	24	4.29	0.24	0.41502	0.820349	4.16667
	36	3.9	0.407667	0.32468	1.35016	2.45298
	48	3.64	0.418667	0.79508	1.37679	2.38854
	72	2.73	0.424667	0.43668	1.39102	2.35479
	84	1.95	0.437333	0.18788	1.42041	2.28659
	96	1.75	0.529667	0.87942	1.61196	1.88798
	108	1.75	0.545333	0.72576	1.64111	1.83374
	120	1.62	0.597333	0.23692	1.73219	1.67411
	132	1.1	0.569667	0.70794	1.68476	1.75541
	144	1.04	0.624333	0.93754	1.77639	1.60171
	156	1.3	0.600333	0.68212	1.7372	1.66574
	171	1.36	0.634333	0.68152	1.79229	1.57646
	180	1.95	0.630667	0.65068	1.78649	1.58562
	192	1.62	0.655	0.73502	1.82435	1.52672
	204	1.62	0.659667	0.0522	1.83145	1.51592
	216	0.84	0.752333	0.36198	1.96289	1.3292
	240	0.78	0.778	0.41438	1.99644	1.28535
	252	0.78	1.244	0.22454	2.4658	0.803859
	264	0.65	1.77933	0.145714	2.8237	0.562008
			1.47667	0.12522	2.63725	0.677201

## Sheet: Luminosity
		Luminosity mesurements
Experiment 1	Time (hours)	L_1	L_2	L_3	L_4	L_5	Average	Optical Density	ln(x/x0)	ln(1-G)
	0	0.3134	0.3109	0.9045	0.7215	0.6284	0.57574	0.115	0	0
	16	1.1273	1.0602	1.236	1.2317	1.0082	1.13268	0.384	1.20571	-0.50557
	28	0.8561	0.7913	0.8178	0.9012	0.522	0.77768	0.773	1.90535	-0.986475
	40	0.6676	0.6284	0.7226	0.7476	0.2772	0.60868	1.02467	2.18719	-1.27252
	52	0.6206	0.5387	0.5918	0.6297	0.1817	0.5125	1.28867	2.41643	-1.58633
	64	0.5034	0.4099	0.6032	0.6135	0.1439	0.45478	1.698	2.69227	-2.17256
	88	0.4071	0.321	0.4489	0.4884	0.1161	0.3563	2.018	2.86493	-2.86367
								2.4	3.03829
Experiment 2	0	0.192	0.2183	0.2486	0.2905	0.7731	0.3445	0.108667	0	0
	6	1.2051	1.0814	1.2022	1.1421	1.4433	1.21482
	12	1.0396	1.0316	1.4746	1.3828	1.1508	1.21588	0.164333	0.413612	-0.143456
	24	0.9968	1.0828	1.0479	1.0596	0.8757	1.01256	0.383	1.25975	-0.522621
	30	0.9198	0.9307	1.0028	0.9887	0.594	0.8872
	36	0.7968	0.7404	0.8156	0.8446	0.3812	0.71572	0.507333	1.54088	-0.6889
	54	0.4939	0.4219	0.5475	0.5468	0.1086	0.42374
	60	0.5105	0.5189	0.5007	0.491	0.093	0.42282	1.33	2.50465	-1.65691
	72	0.4759	0.4428	0.3984	0.4118	0.0504	0.35586	1.66	2.72629	-2.12767
	78	0.3343	0.3427	0.3714	0.3447	0.0251	0.28364	1.732	2.76875	-2.25004
	96	0.3613	0.3436	0.3304	0.2919	0.026	0.27064	1.82	2.81831	-2.41483
								2.4	3.09494
Experiment 3	0	0.5473	0.5897	0.8947	0.7663	0.6738	0.69436	0.102333	0	0
	4	0.523	0.6254	0.8116	0.7501	0.6167	0.66536	0.119333	0.153685	-0.0499382
	16	0.4263	0.5054	0.6393	0.5635	0.472	0.5213	0.184333	0.58851	-0.20645
	19	0.39	0.4233	0.5785	0.5313	0.4468	0.47398	0.183667	0.584887	-0.205039
	22	0.351	0.4309	0.5934	0.5336	0.4311	0.468	0.329333	1.16883	-0.462785
	25	1.1477	1.0812	1.3641	1.3889	1.0729	1.21096	0.436667	1.45093	-0.615975
	40	0.9388	1.0373	1.3145	1.3242	0.8854	1.10004	0.479667	1.54486	-0.672668
	46	0.9275	0.8697	1.2848	1.3232	0.7217	1.02538	0.521333	1.62815	-0.725788
	49	0.7459	0.7702	1.1674	1.197	0.6601	0.90812	0.653333	1.85385	-0.885747
	52	0.6666	0.6466	1.0745	1.0522	0.4996	0.7879	0.670333	1.87954	-0.905687
	64	0.5421	0.6206	1.0399	1.0683	0.4103	0.73624	0.717667	1.94777	-0.960666
	70	0.4292	0.4441	0.8774	0.9314	0.2628	0.58898	1.29333	2.53674	-1.62985
	76	0.3978	0.424	0.876	0.9015	0.2352	0.5669	1.45	2.65108	-1.83435
	88	0.3443	0.3828	0.8602	0.8336	0.18	0.52018	1.51583	2.69549	-1.92659
	94	0.2702	0.316	0.7722	0.8114	0.1423	0.46242	1.705	2.81308	-2.22221
	98	0.6003	0.6873	0.5629	0.5126	0.177	0.50802	1.70083	2.81064	-2.21508
								2.4	3.15499
